# Supplementary material for: Transcriptome analysis of duck embryo fibroblasts for the dynamic response to duck tembusu virus infection and dual regulation of apoptosis genes
Source: Aging (Albany NY). 2020 Sep 7;12(17):17503–27. doi: 10.18632/aging.103759 (PMC7521532; doi:10.18632/aging.103759)
Supplement: Supplementary Dataset 1 [file aging-12-103759-s005..xlsx]

## Sheet: DEGs-12h
Supplementary Dataset 1. Information of differentially expressed genes at 12, 24, 36, 48 and 60 hpi.
gene_id	baseMean	baseMean_control_12h_Con	baseMean_case_12h_DTMUV	foldChange	log2FoldChange	pval	padj	up_down	expression_Sample_12h_C_1	expression_Sample_12h_C_2	expression_Sample_12h_C_3	expression_Sample_12h_V_1	expression_Sample_12h_V_2	expression_Sample_12h_V_3	gene_Dbxref	description	GO_id	GO_term	pathway	pathway_description
ABHD14A	27.6054	38.6795	16.5313	0.427392	-1.22637	0.00244366	0.0121283	Down	3.36847	3.18669	2.83099	3.25887	0.566202	0.618274	GeneID:113845100	abhydrolase domain containing 14A	GO:0005737,GO:0016021,GO:0016787	cytoplasm|integral component of membrane|hydrolase activity
ABLIM3	85.9681	121.996	49.94	0.409357	-1.28857	3.36692e-08	4.77493e-07	Down	0.672957	0.425429	0.239745	0.14944	0.258538	0.222731	GeneID:101804679	actin binding LIM protein family member 3	GO:0001725,GO:0005737,GO:0006351,GO:0015629,GO:0030027,GO:0030032,GO:0030036,GO:0045944,GO:0046872,GO:0051015,GO:0060271,GO:0098978,GO:1903955	stress fiber|cytoplasm|transcription, DNA-templated|actin cytoskeleton|lamellipodium|lamellipodium assembly|actin cytoskeleton organization|positive regulation of transcription by RNA polymerase II|metal ion binding|actin filament binding|cilium assembly|glutamatergic synapse|positive regulation of protein targeting to mitochondrion
ACKR2	93.5367	41.6527	145.421	3.49127	1.80375	1.74328e-15	4.94947e-14	Up	0.816858	0.7394	0.366747	2.26592	1.95665	2.1218	GeneID:101797665	atypical chemokine receptor 2	GO:0004950,GO:0005044,GO:0005654,GO:0005769,GO:0005829,GO:0005884,GO:0005886,GO:0005887,GO:0006935,GO:0006954,GO:0006955,GO:0007186,GO:0007204,GO:0007275,GO:0009897,GO:0016493,GO:0019722,GO:0019956,GO:0019957,GO:0031965,GO:0043231,GO:0055037,GO:0060326	chemokine receptor activity|scavenger receptor activity|nucleoplasm|early endosome|cytosol|actin filament|plasma membrane|integral component of plasma membrane|chemotaxis|inflammatory response|immune response|G protein-coupled receptor signaling pathway|positive regulation of cytosolic calcium ion concentration|multicellular organism development|external side of plasma membrane|C-C chemokine rece…
ACKR4	1563.83	557.025	2570.64	4.61495	2.20631	1.57915e-75	2.1286e-73	Up	8.68421	8.35166	9.44832	34.9371	38.5542	35.5378	GeneID:101804100	atypical chemokine receptor 4	GO:0004950,GO:0005044,GO:0005769,GO:0006935,GO:0006955,GO:0007204,GO:0009897,GO:0016021,GO:0016493,GO:0019722,GO:0019956,GO:0019957,GO:0055037,GO:0060326	chemokine receptor activity|scavenger receptor activity|early endosome|chemotaxis|immune response|positive regulation of cytosolic calcium ion concentration|external side of plasma membrane|integral component of membrane|C-C chemokine receptor activity|calcium-mediated signaling|chemokine binding|C-C chemokine binding|recycling endosome|cell chemotaxis	path:apla04060	Cytokine-cytokine receptor interaction
ACSL5	3.74143	6.80992	0.672934	0.0988168	-3.3391	0.0294719	0.0944606	Down	0.050241	0.123697	0.0250188	0	0	0.0251197	GeneID:101801834	acyl-CoA synthetase long chain family member 5	GO:0004467,GO:0005524,GO:0005739,GO:0005741,GO:0005789,GO:0006631,GO:0007584,GO:0008654,GO:0009744,GO:0009749,GO:0010747,GO:0010867,GO:0015908,GO:0016021,GO:0032000,GO:0032869,GO:0035338,GO:0070723,GO:0102391	long-chain fatty acid-CoA ligase activity|ATP binding|mitochondrion|mitochondrial outer membrane|endoplasmic reticulum membrane|fatty acid metabolic process|response to nutrient|phospholipid biosynthetic process|response to sucrose|response to glucose|positive regulation of plasma membrane long-chain fatty acid transport|positive regulation of triglyceride biosynthetic process|fatty acid transpor…	path:apla00061,path:apla00071,path:apla03320,path:apla04146,path:apla04216,path:apla04920	Fatty acid biosynthesis|Fatty acid degradation|PPAR signaling pathway|Peroxisome|Ferroptosis|Adipocytokine signaling pathway
ACVR1C	4.06749	1.30767	6.82731	5.22097	2.38432	0.0476827	0.137848	Up	0.0289817	0.00958999	0	0.0378521	0.048381	0.0580212	GeneID:101794826	activin A receptor type 1C	GO:0002021,GO:0004674,GO:0005024,GO:0005025,GO:0005524,GO:0005886,GO:0005887,GO:0006468,GO:0007179,GO:0007389,GO:0009749,GO:0016361,GO:0019838,GO:0019915,GO:0030154,GO:0030262,GO:0032868,GO:0032924,GO:0038092,GO:0038100,GO:0043235,GO:0043280,GO:0046332,GO:0046676,GO:0046872,GO:0048179,GO:0048185,GO:1901164,GO:1901383	response to dietary excess|protein serine/threonine kinase activity|transforming growth factor beta-activated receptor activity|transforming growth factor beta receptor activity, type I|ATP binding|plasma membrane|integral component of plasma membrane|protein phosphorylation|transforming growth factor beta receptor signaling pathway|pattern specification process|response to glucose|activin recept…	path:apla04060,path:apla04350	Cytokine-cytokine receptor interaction|TGF-beta signaling pathway
ADAMTS15	552.375	743.349	361.402	0.486181	-1.04044	6.41721e-19	2.27969e-17	Down	8.27585	7.63231	6.93587	4.30045	3.50317	3.82893	GeneID:101799743	ADAM metallopeptidase with thrombospondin type 1 motif 15	GO:0004175,GO:0004222,GO:0005615,GO:0008201,GO:0008270,GO:0009986,GO:0050840,GO:0062023	endopeptidase activity|metalloendopeptidase activity|extracellular space|heparin binding|zinc ion binding|cell surface|extracellular matrix binding|collagen-containing extracellular matrix
ADAR	2509.96	1080.74	3939.18	3.6449	1.86588	1.58541e-153	4.39738e-151	Up	11.4074	11.1028	11.1535	40.692	38.3994	40.0082	GeneID:101796198	adenosine deaminase, RNA specific	GO:0003677,GO:0003725,GO:0003726,GO:0005634,GO:0005730,GO:0005737,GO:0006382,GO:0006396,GO:0006397,GO:0008251,GO:0009615,GO:0016607,GO:0031047,GO:0035455,GO:0044387,GO:0044530,GO:0045070,GO:0045087,GO:0046872,GO:0051607	DNA binding|double-stranded RNA binding|double-stranded RNA adenosine deaminase activity|nucleus|nucleolus|cytoplasm|adenosine to inosine editing|RNA processing|mRNA processing|tRNA-specific adenosine deaminase activity|response to virus|nuclear speck|gene silencing by RNA|response to interferon-alpha|negative regulation of protein kinase activity by regulation of protein phosphorylation|supraspl…	path:apla04623,path:apla05164	Cytosolic DNA-sensing pathway|Influenza A
ADGRG7	77.6369	44.5251	110.749	2.48734	1.3146	4.77804e-08	6.69716e-07	Up	0.442488	0.422977	0.459526	0.926558	0.75111	0.935355	GeneID:101794823	adhesion G protein-coupled receptor G7	GO:0004930,GO:0005622,GO:0005887,GO:0007166,GO:0007186,GO:0007189,GO:0016021	G protein-coupled receptor activity|intracellular|integral component of plasma membrane|cell surface receptor signaling pathway|G protein-coupled receptor signaling pathway|adenylate cyclase-activating G protein-coupled receptor signaling pathway|integral component of membrane
ADGRL4	14.9061	8.7583	21.0539	2.40388	1.26536	0.0224399	0.0759743	Up	0.0457567	0.0674267	0.16987	0.132812	0.237763	0.251507	GeneID:101803808	adhesion G protein-coupled receptor L4	GO:0004930,GO:0005509,GO:0005886,GO:0005887,GO:0007166,GO:0007186,GO:0007189,GO:0016021,GO:0031410,GO:0046983	G protein-coupled receptor activity|calcium ion binding|plasma membrane|integral component of plasma membrane|cell surface receptor signaling pathway|G protein-coupled receptor signaling pathway|adenylate cyclase-activating G protein-coupled receptor signaling pathway|integral component of membrane|cytoplasmic vesicle|protein dimerization activity
ADRA1B	5.38134	9.75476	1.00791	0.103325	-3.27474	0.00330151	0.0155919	Down	0.185992	0.184905	0.117742	0.0172066	0	0.0341446	GeneID:101800019	adrenoceptor alpha 1B	GO:0001994,GO:0004935,GO:0004937,GO:0005634,GO:0005737,GO:0005887,GO:0005901,GO:0007188,GO:0007200,GO:0007204,GO:0009725,GO:0014704,GO:0016020,GO:0030315,GO:0031965,GO:0035024,GO:0042493,GO:0042593,GO:0043410,GO:0043627,GO:0045907,GO:0045987,GO:0046982,GO:0048545,GO:0055117,GO:0071880	norepinephrine-epinephrine vasoconstriction involved in regulation of systemic arterial blood pressure|adrenergic receptor activity|alpha1-adrenergic receptor activity|nucleus|cytoplasm|integral component of plasma membrane|caveola|adenylate cyclase-modulating G protein-coupled receptor signaling pathway|phospholipase C-activating G protein-coupled receptor signaling pathway|positive regulation o…	path:apla04020,path:apla04080,path:apla04261,path:apla04270	Calcium signaling pathway|Neuroactive ligand-receptor interaction|Adrenergic signaling in cardiomyocytes|Vascular smooth muscle contraction
AGTR1	212.587	291.853	133.322	0.456814	-1.13032	7.57629e-14	1.9004e-12	Down	1.26936	1.36718	1.22087	0.50383	0.521746	0.600373	GeneID:101804939	angiotensin II receptor type 1	GO:0004945,GO:0005886,GO:0016021,GO:0019229	angiotensin type II receptor activity|plasma membrane|integral component of membrane|regulation of vasoconstriction	path:apla04020,path:apla04080,path:apla04261,path:apla04270,path:apla04371,path:apla04933	Calcium signaling pathway|Neuroactive ligand-receptor interaction|Adrenergic signaling in cardiomyocytes|Vascular smooth muscle contraction|Apelin signaling pathway|AGE-RAGE signaling pathway in diabetic complications
AJM1	11.6692	16.5333	6.80504	0.411597	-1.2807	0.0416113	0.123642	Down	0.0804145	0.220503	0.121635	0.0711538	0.0862169	0.0730641	GeneID:101798667	apical junction component 1 homolog	GO:0005912,GO:0005929,GO:0016324,GO:0045216	adherens junction|cilium|apical plasma membrane|cell-cell junction organization
ALDH1A1	84.1869	113.117	55.2566	0.48849	-1.0336	7.36209e-06	7.01807e-05	Down	1.78598	1.33073	2.08201	0.914006	0.571333	0.728983	GeneID:101802481	aldehyde dehydrogenase 1 family member A1	GO:0001523,GO:0001758,GO:0004029,GO:0005829,GO:0018479,GO:0042572,GO:0055114	retinoid metabolic process|retinal dehydrogenase activity|aldehyde dehydrogenase (NAD) activity|cytosol|benzaldehyde dehydrogenase (NAD+) activity|retinol metabolic process|oxidation-reduction process	path:apla00830	Retinol metabolism
ALDOB	89.9532	59.4143	120.492	2.028	1.02006	4.71188e-06	4.64838e-05	Up	1.11056	1.48701	1.6969	2.3909	2.78804	3.16443	GeneID:101796090	aldolase, fructose-bisphosphate B	GO:0001889,GO:0004332,GO:0005815,GO:0005829,GO:0006000,GO:0006094,GO:0006096,GO:0006116,GO:0008092,GO:0030388,GO:0032781,GO:0034451,GO:0042802,GO:0051117,GO:0061609,GO:0070061,GO:0070062,GO:0070072	liver development|fructose-bisphosphate aldolase activity|microtubule organizing center|cytosol|fructose metabolic process|gluconeogenesis|glycolytic process|NADH oxidation|cytoskeletal protein binding|fructose 1,6-bisphosphate metabolic process|positive regulation of ATPase activity|centriolar satellite|identical protein binding|ATPase binding|fructose-1-phosphate aldolase activity|fructose bind…	path:apla00010,path:apla00030,path:apla00051	Glycolysis / Gluconeogenesis|Pentose phosphate pathway|Fructose and mannose metabolism
ALK	503.5	324.612	682.389	2.10217	1.07188	3.4425e-19	1.24128e-17	Up	1.44884	1.50749	1.53137	3.31285	2.7003	2.95651	GeneID:101797885	ALK receptor tyrosine kinase
ALPK1	89.6381	53.902	125.374	2.32596	1.21783	3.35109e-05	0.000274307	Up	0.223474	0.335727	0.159963	0.653202	0.405067	0.699309	GeneID:101803049	alpha kinase 1	GO:0002753,GO:0004674,GO:0005524,GO:0005829,GO:0043123,GO:0045087,GO:0048029	cytoplasmic pattern recognition receptor signaling pathway|protein serine/threonine kinase activity|ATP binding|cytosol|positive regulation of I-kappaB kinase/NF-kappaB signaling|innate immune response|monosaccharide binding
ALX3	71.4573	39.9989	102.916	2.57296	1.36343	6.16715e-08	8.51185e-07	Up	0.57702	0.622467	0.442446	1.60422	1.43894	1.43598	GeneID:101803959	ALX homeobox 3	GO:0003677,GO:0003700,GO:0005634,GO:0006355,GO:0007389,GO:0035115,GO:0035116,GO:0042981,GO:0043565,GO:0048701,GO:0048704	DNA binding|DNA-binding transcription factor activity|nucleus|regulation of transcription, DNA-templated|pattern specification process|embryonic forelimb morphogenesis|embryonic hindlimb morphogenesis|regulation of apoptotic process|sequence-specific DNA binding|embryonic cranial skeleton morphogenesis|embryonic skeletal system morphogenesis
ANGPT1	149.599	76.6614	222.536	2.90285	1.53747	1.22795e-17	3.9357e-16	Up	0.446748	0.523151	0.537105	1.20382	1.47434	1.2701	GeneID:101795228	angiopoietin 1			path:apla04010	MAPK signaling pathway
ANGPTL5	27.1828	41.8807	12.4848	0.298104	-1.74611	2.79276e-05	0.000233102	Down	0.603052	0.83809	0.942567	0.346335	0.136175	0.296956	GeneID:101793067	angiopoietin like 5	GO:0005576	extracellular region
ANKFN1	94.7089	40.5482	148.87	3.67142	1.87634	5.75785e-14	1.4595e-12	Up	0.0863033	0.18122	0.130155	0.359379	0.366337	0.505689	GeneID:101791392	ankyrin repeat and fibronectin type III domain containing 1
ANKRD12	1583.53	958.698	2208.37	2.30351	1.20383	8.3847e-35	5.92806e-33	Up	4.3146	4.32776	4.46289	7.63596	9.36357	8.93611	GeneID:101802980	ankyrin repeat domain 12	GO:0005654,GO:0005829	nucleoplasm|cytosol
ANKRD33B	218.827	101.022	336.632	3.33227	1.73651	9.79975e-30	5.81653e-28	Up	0.966976	1.15168	1.07184	3.54724	3.34652	3.50427	GeneID:101794598	ankyrin repeat domain 33B	GO:0003677	DNA binding
ANKRD34B	59.2601	83.6103	34.9098	0.41753	-1.26005	4.90736e-06	4.82802e-05	Down	0.862171	0.660508	0.632062	0.312054	0.263449	0.272947	GeneID:101797474	ankyrin repeat domain 34B	GO:0005634,GO:0005737	nucleus|cytoplasm
ANKRD55	14.2927	6.49834	22.087	3.39887	1.76506	0.00225367	0.0113217	Up	0.0273533	0.0273441	0.123184	0.301402	0.281394	0.248152	GeneID:101793834	ankyrin repeat domain 55
ANKRD6	866.092	212.314	1519.87	7.1586	2.83968	8.80697e-50	8.52503e-48	Up	1.27884	1.15604	0.931043	6.85151	7.98852	7.48219	GeneID:101800417	ankyrin repeat domain 6	GO:0005634,GO:0005737,GO:0043231,GO:0090090,GO:2000096	nucleus|cytoplasm|intracellular membrane-bounded organelle|negative regulation of canonical Wnt signaling pathway|positive regulation of Wnt signaling pathway, planar cell polarity pathway
ANKRD9	122.276	20.4828	224.069	10.9394	3.45146	2.00773e-44	1.755e-42	Up	1.93853	1.38322	2.56233	29.5434	17.9144	17.7656	GeneID:101790995	ankyrin repeat domain 9	GO:0005829,GO:0016020,GO:0043194,GO:0043687,GO:0044325,GO:0072659	cytosol|membrane|axon initial segment|post-translational protein modification|ion channel binding|protein localization to plasma membrane
ANPEP	1185.66	771.047	1600.26	2.07544	1.05342	1.81065e-20	6.94546e-19	Up	8.42542	8.76464	7.66138	18.0836	17.4359	18.9099	GeneID:101804534	alanyl aminopeptidase, membrane	GO:0005737,GO:0005793,GO:0005886,GO:0006508,GO:0008270,GO:0009897,GO:0016021,GO:0042277,GO:0043171,GO:0070006,GO:0070062	cytoplasm|endoplasmic reticulum-Golgi intermediate compartment|plasma membrane|proteolysis|zinc ion binding|external side of plasma membrane|integral component of membrane|peptide binding|peptide catabolic process|metalloaminopeptidase activity|extracellular exosome	path:apla00480	Glutathione metabolism
APAF1	889.706	428.954	1350.46	3.14826	1.65455	1.47013e-75	2.0194e-73	Up	3.63189	3.78418	3.57188	10.5559	10.4234	11.2386	GeneID:101799443	apoptotic peptidase activating factor 1			path:apla04115,path:apla04210,path:apla05168	p53 signaling pathway|Apoptosis|Herpes simplex infection
APOLD1	22.3838	5.5157	39.2519	7.11639	2.83115	0.000499817	0.0030663	Up	0.058451	0.162908	0.0147899	0.338742	0.811498	0.507198	GeneID:101798726	apolipoprotein L domain containing 1	GO:0001525,GO:0001666,GO:0005576,GO:0005654,GO:0005829,GO:0005886,GO:0006869,GO:0008289,GO:0016021,GO:0030154,GO:0042118,GO:0042157,GO:0045601	angiogenesis|response to hypoxia|extracellular region|nucleoplasm|cytosol|plasma membrane|lipid transport|lipid binding|integral component of membrane|cell differentiation|endothelial cell activation|lipoprotein metabolic process|regulation of endothelial cell differentiation
AQP3	27.0337	16.555	37.5125	2.26593	1.1801	0.0130292	0.0489806	Up	0.347773	0.377328	0.81931	1.15069	0.718379	1.37153	GeneID:101795669	aquaporin 3 (Gill blood group)	GO:0002684,GO:0005634,GO:0005737,GO:0005911,GO:0015254,GO:0015840,GO:0016021,GO:0016323,GO:0032526,GO:0042476,GO:0070295,GO:0071456,GO:0090650	positive regulation of immune system process|nucleus|cytoplasm|cell-cell junction|glycerol channel activity|urea transport|integral component of membrane|basolateral plasma membrane|response to retinoic acid|odontogenesis|renal water absorption|cellular response to hypoxia|cellular response to oxygen-glucose deprivation
ARHGAP8	132.129	61.6932	202.566	3.28343	1.71521	4.06714e-19	1.45921e-17	Up	0.347997	0.381788	0.494281	1.21436	1.21935	1.47894	GeneID:101794945	Rho GTPase activating protein 8	GO:0005096,GO:0005829,GO:0007165,GO:0051056,GO:0070374	GTPase activator activity|cytosol|signal transduction|regulation of small GTPase mediated signal transduction|positive regulation of ERK1 and ERK2 cascade
ARL14EPL	33.6186	45.1961	22.041	0.487675	-1.03601	0.00423896	0.0191597	Down	0.385513	0.328509	0.305443	0.157595	0.0860069	0.215461	GeneID:101796430	ADP ribosylation factor like GTPase 14 effector protein like
ART5	26.774	8.77521	44.7728	5.10218	2.35112	6.17652e-08	8.51663e-07	Up	0.0739125	0.077298	0.150473	1.51055	1.11135	1.19996	GeneID:101800656	ADP-ribosyltransferase 5	GO:0003950,GO:0003956,GO:0005576,GO:0006471,GO:0016020,GO:0018120	NAD+ ADP-ribosyltransferase activity|NAD(P)+-protein-arginine ADP-ribosyltransferase activity|extracellular region|protein ADP-ribosylation|membrane|peptidyl-arginine ADP-ribosylation
ASB12	37.6356	52.9532	22.318	0.421467	-1.24651	0.00549658	0.0238428	Down	1.36423	1.93587	1.34814	1.22316	0.492357	0.345339	GeneID:101791994	ankyrin repeat and SOCS box containing 12	GO:0000151,GO:0005829,GO:0016567,GO:0043687	ubiquitin ligase complex|cytosol|protein ubiquitination|post-translational protein modification
ASPA	46.2117	25.9906	66.4327	2.55603	1.3539	1.33627e-05	0.000119857	Up	0.436791	0.336194	0.467029	0.824966	0.787521	0.97213	GeneID:101795665	aspartoacylase	GO:0005634,GO:0005737,GO:0016788,GO:0019807,GO:0046872	nucleus|cytoplasm|hydrolase activity, acting on ester bonds|aspartoacylase activity|metal ion binding	path:apla00250,path:apla00340	Alanine, aspartate and glutamate metabolism|Histidine metabolism
ASPG	478.202	162.146	794.257	4.89841	2.29231	1.34903e-87	2.23645e-85	Up	2.41541	3.27311	2.51578	13.3645	12.4376	11.6992	GeneID:101800984	asparaginase	GO:0004067,GO:0006528	asparaginase activity|asparagine metabolic process
ATF3	1545.92	717.683	2374.16	3.30808	1.726	3.34319e-46	3.03264e-44	Up	9.42323	10.6426	9.64427	31.9691	31.9234	29.4863	GeneID:101805187	activating transcription factor 3
ATP10A	1726.16	826.375	2625.95	3.17767	1.66797	4.91834e-108	1.04319e-105	Up	5.884	6.43571	6.2145	19.5254	18.5721	18.9979	GeneID:101795223	ATPase phospholipid transporting 10A (putative)	GO:0000287,GO:0004012,GO:0005524,GO:0005783,GO:0005789,GO:0005886,GO:0016021,GO:0045332	magnesium ion binding|phospholipid-translocating ATPase activity|ATP binding|endoplasmic reticulum|endoplasmic reticulum membrane|plasma membrane|integral component of membrane|phospholipid translocation
ATP6V0A2	1798.08	949.399	2646.76	2.78783	1.47914	3.07409e-88	5.27828e-86	Up	13.7897	13.6959	14.3365	36.2891	35.8187	36.0977	GeneID:101799483	ATPase H+ transporting V0 subunit a2	GO:0000220,GO:0001669,GO:0005765,GO:0005886,GO:0006879,GO:0006955,GO:0007035,GO:0008286,GO:0010008,GO:0015991,GO:0016021,GO:0016241,GO:0016471,GO:0030670,GO:0033572,GO:0034220,GO:0036295,GO:0046961,GO:0051117	vacuolar proton-transporting V-type ATPase, V0 domain|acrosomal vesicle|lysosomal membrane|plasma membrane|cellular iron ion homeostasis|immune response|vacuolar acidification|insulin receptor signaling pathway|endosome membrane|ATP hydrolysis coupled proton transport|integral component of membrane|regulation of macroautophagy|vacuolar proton-transporting V-type ATPase complex|phagocytic vesicle …	path:apla00190,path:apla04142,path:apla04145	Oxidative phosphorylation|Lysosome|Phagosome
AVPR1A	14.9051	8.10413	21.706	2.67839	1.42137	0.0106471	0.0414922	Up	0.0782838	0.273726	0.0974775	0.458968	0.400971	0.394744	GeneID:101796503	arginine vasopressin receptor 1A			path:apla04020,path:apla04080,path:apla04270	Calcium signaling pathway|Neuroactive ligand-receptor interaction|Vascular smooth muscle contraction
B2M	3204.38	765.179	5643.59	7.37551	2.88274	0	0	Up	43.8399	44.4433	40.2769	373.549	334.471	336.56	GeneID:101799108	beta-2-microglobulin	GO:0002474,GO:0005576,GO:0006955,GO:0042612	antigen processing and presentation of peptide antigen via MHC class I|extracellular region|immune response|MHC class I protein complex	path:apla05168	Herpes simplex infection
B3GALT2	241.43	149.739	333.122	2.22469	1.15361	7.5365e-16	2.19151e-14	Up	1.18627	1.38166	1.56537	2.63615	3.14761	2.98053	GeneID:101802460	beta-1,3-galactosyltransferase 2			path:apla00601	Glycosphingolipid biosynthesis - lacto and neolacto series
B3GNT7	23.3484	12.0299	34.667	2.88173	1.52694	0.000563144	0.00340554	Up	0.15262	0.107359	0.176837	0.322096	0.410397	0.451664	GeneID:101797691	UDP-GlcNAc:betaGal beta-1,3-N-acetylglucosaminyltransferase 7			path:apla00533	Glycosaminoglycan biosynthesis - keratan sulfate
B4GALNT4	2960.73	1539.65	4381.8	2.84597	1.50892	4.03029e-90	7.2661e-88	Up	13.6559	14.303	13.0552	40.6188	36.02	38.8966	GeneID:101795425	beta-1,4-N-acetyl-galactosaminyltransferase 4	GO:0008376,GO:0016021,GO:0032580,GO:0033842	acetylgalactosaminyltransferase activity|integral component of membrane|Golgi cisterna membrane|N-acetyl-beta-glucosaminyl-glycoprotein 4-beta-N-acetylgalactosaminyltransferase activity
BAK1	3747.33	2285.81	5208.86	2.27878	1.18826	3.89938e-75	5.20747e-73	Up	22.6005	23.7916	24.652	56.0099	52.8119	52.2738	GeneID:101789424	BCL2 antagonist/killer 1			path:apla04141,path:apla04210,path:apla05168	Protein processing in endoplasmic reticulum|Apoptosis|Herpes simplex infection
BBIP1	49.097	67.341	30.853	0.458161	-1.12607	0.00326988	0.0154476	Down	25.4952	12.7694	24.506	9.58178	8.78876	13.2939	GeneID:106015390	BBSome interacting protein 1	GO:0005737,GO:0032402,GO:0034464,GO:0060271,GO:0070121,GO:0097500	cytoplasm|melanosome transport|BBSome|cilium assembly|Kupffer's vesicle development|receptor localization to non-motile cilium
BCL2A1	35.3061	23.4663	47.1458	2.00908	1.00654	0.00405055	0.0184585	Up	1.2836	0.613582	0.43724	1.43551	1.49838	1.30028	GeneID:101800789	BCL2 related protein A1	GO:0005741,GO:0007568,GO:0008630,GO:0021987,GO:0042803,GO:0043066,GO:0046982,GO:0051400,GO:0097192,GO:2001243	mitochondrial outer membrane|aging|intrinsic apoptotic signaling pathway in response to DNA damage|cerebral cortex development|protein homodimerization activity|negative regulation of apoptotic process|protein heterodimerization activity|BH domain binding|extrinsic apoptotic signaling pathway in absence of ligand|negative regulation of intrinsic apoptotic signaling pathway	path:apla04210	Apoptosis
BCL2L15	41.5666	2.27791	80.8553	35.4954	5.14956	1.88813e-19	6.89429e-18	Up	0.213812	0.142974	0.0721651	5.54988	4.90007	3.3161	GeneID:101796858	BCL2 like 15	GO:0005634,GO:0005829,GO:0006915,GO:0042981	nucleus|cytosol|apoptotic process|regulation of apoptotic process
BCO1	135.573	66.7396	204.407	3.06275	1.61483	1.02446e-17	3.32789e-16	Up	1.17029	0.709438	0.689036	2.04025	2.76509	2.58759	GeneID:101798614	beta-carotene oxygenase 1	GO:0001523,GO:0003834,GO:0004497,GO:0004744,GO:0010436,GO:0016121,GO:0032526,GO:0042572,GO:0042574,GO:0046872,GO:1901810	retinoid metabolic process|beta-carotene 15,15'-monooxygenase activity|monooxygenase activity|retinal isomerase activity|carotenoid dioxygenase activity|carotene catabolic process|response to retinoic acid|retinol metabolic process|retinal metabolic process|metal ion binding|beta-carotene metabolic process	path:apla00830	Retinol metabolism
BIRC2	3460.87	1499.11	5422.63	3.61723	1.85488	1.99165e-168	6.11182e-166	Up	19.6569	18.5766	19.4807	63.5914	63.7631	62.9689	GeneID:101793263	baculoviral IAP repeat containing 2	GO:0005634,GO:0005737,GO:0043027,GO:0043066,GO:0046872,GO:0060546,GO:0061630,GO:1990001	nucleus|cytoplasm|cysteine-type endopeptidase inhibitor activity involved in apoptotic process|negative regulation of apoptotic process|metal ion binding|negative regulation of necroptotic process|ubiquitin protein ligase activity|inhibition of cysteine-type endopeptidase activity involved in apoptotic process	path:apla04120,path:apla04210,path:apla04217,path:apla04510,path:apla04621,path:apla05168	Ubiquitin mediated proteolysis|Apoptosis|Necroptosis|Focal adhesion|NOD-like receptor signaling pathway|Herpes simplex infection
BLK	12.9035	7.15736	18.6496	2.60566	1.38165	0.0208129	0.0715235	Up	0.096466	0.130401	0	0.26141	0.193257	0.210141	GeneID:101794713	BLK proto-oncogene, Src family tyrosine kinase	GO:0004713,GO:0004715,GO:0005102,GO:0005524,GO:0005829,GO:0007169,GO:0030154,GO:0031234,GO:0032024,GO:0038083,GO:0050853	protein tyrosine kinase activity|non-membrane spanning protein tyrosine kinase activity|signaling receptor binding|ATP binding|cytosol|transmembrane receptor protein tyrosine kinase signaling pathway|cell differentiation|extrinsic component of cytoplasmic side of plasma membrane|positive regulation of insulin secretion|peptidyl-tyrosine autophosphorylation|B cell receptor signaling pathway
BMP4	1054.65	1454.75	654.552	0.449941	-1.15219	4.75121e-32	3.08679e-30	Down	67.1354	69.1989	71.7396	31.5511	29.8786	36.4771	GeneID:101803077	bone morphogenetic protein 4	GO:0000122,GO:0001503,GO:0005125,GO:0005160,GO:0005615,GO:0008083,GO:0008283,GO:0009951,GO:0010453,GO:0010862,GO:0030509,GO:0042981,GO:0043066,GO:0043408,GO:0045606,GO:0045892,GO:0045893,GO:0048392,GO:0048468,GO:0048704,GO:0051216,GO:0060197,GO:0060395,GO:0060675,GO:0070700,GO:0071729,GO:0072138,GO:0072179,GO:0072198,GO:2000290,GO:2000872	negative regulation of transcription by RNA polymerase II|ossification|cytokine activity|transforming growth factor beta receptor binding|extracellular space|growth factor activity|cell proliferation|polarity specification of dorsal/ventral axis|regulation of cell fate commitment|positive regulation of pathway-restricted SMAD protein phosphorylation|BMP signaling pathway|regulation of apoptotic p…	path:apla04060,path:apla04350	Cytokine-cytokine receptor interaction|TGF-beta signaling pathway
BSN	315.229	420.907	209.552	0.497858	-1.00619	2.65724e-15	7.44181e-14	Down	1.71542	1.94404	1.63574	1.06114	0.907104	0.907641	GeneID:101789549	bassoon presynaptic cytomatrix protein	GO:0005634,GO:0007268,GO:0007416,GO:0008021,GO:0009986,GO:0014069,GO:0030054,GO:0030424,GO:0030425,GO:0030672,GO:0035418,GO:0044306,GO:0046872,GO:0048786,GO:0048788,GO:0060076,GO:0098685,GO:0098693,GO:0098882,GO:0098978,GO:0098982,GO:0099526	nucleus|chemical synaptic transmission|synapse assembly|synaptic vesicle|cell surface|postsynaptic density|cell junction|axon|dendrite|synaptic vesicle membrane|protein localization to synapse|neuron projection terminus|metal ion binding|presynaptic active zone|cytoskeleton of presynaptic active zone|excitatory synapse|Schaffer collateral - CA1 synapse|regulation of synaptic vesicle cycle|structu…
C12H15orf48	382.719	64.0643	701.374	10.948	3.45259	6.84317e-51	6.76021e-49	Up	2.10129	2.12422	1.62335	21.119	20.9744	18.4002	GeneID:101795211	chromosome 12 C15orf48 homolog	GO:0005634,GO:0005751,GO:0009617,GO:0022900,GO:1902600	nucleus|mitochondrial respiratory chain complex IV|response to bacterium|electron transport chain|proton transmembrane transport
C1HXorf21	9.3801	4.88048	13.8797	2.84392	1.50788	0.0341636	0.105967	Up	0.122375	0.0609886	0.122006	0.277042	0.19015	0.378944	GeneID:101803977	chromosome 1 CXorf21 homolog
C1QA	153.978	22.1076	285.849	12.9299	3.69264	5.30161e-54	5.46179e-52	Up	1.14576	1.01525	0.833276	13.3596	14.3621	14.7778	GeneID:101803758	complement C1q A chain	GO:0005576,GO:0005581,GO:0006958,GO:0045087	extracellular region|collagen trimer|complement activation, classical pathway|innate immune response
C1R	2724.25	681.497	4767	6.99489	2.8063	0	0	Up	9.05211	9.73393	10.0435	70.1551	63.0336	66.038	GeneID:101791982	complement C1r	GO:0004252,GO:0005509,GO:0006958,GO:0045087	serine-type endopeptidase activity|calcium ion binding|complement activation, classical pathway|innate immune response	path:apla04145	Phagosome
C1S	4311.66	512.097	8111.22	15.8392	3.98543	0	0	Up	7.88542	8.20344	8.86963	121.495	118.448	120.148	GeneID:101791779	complement C1s
C3H1orf115	21.9737	11.3647	32.5828	2.86702	1.51955	0.00087033	0.00498126	Up	0.321853	0.318712	0.604334	1.35213	1.13723	0.695336	GeneID:113843041	chromosome 3 C1orf115 homolog	GO:0016021	integral component of membrane
C4H4orf19	28.9162	43.5835	14.2489	0.326933	-1.61294	5.53709e-05	0.000432385	Down	0.595892	0.612782	0.336029	0.146209	0.157766	0.209518	GeneID:101796779	chromosome 4 C4orf19 homolog	GO:0005654,GO:0030054	nucleoplasm|cell junction
C4H4orf54	33.4004	50.0987	16.7021	0.333385	-1.58474	0.000791416	0.00458602	Down	0.875654	0.473163	0.917572	0.16098	0.331416	0.249777	GeneID:113843490	chromosome 4 C4orf54 homolog
C5	19.1794	4.86462	33.4942	6.88526	2.78351	1.76036e-07	2.23304e-06	Up	0.0269451	0.0874839	0	0.162853	0.149084	0.151227	GeneID:101797076	complement C5	GO:0001701,GO:0004866,GO:0005579,GO:0005615,GO:0006954,GO:0006957,GO:0006958,GO:0010575,GO:0010760,GO:0019835,GO:0045766,GO:0090197	in utero embryonic development|endopeptidase inhibitor activity|membrane attack complex|extracellular space|inflammatory response|complement activation, alternative pathway|complement activation, classical pathway|positive regulation of vascular endothelial growth factor production|negative regulation of macrophage chemotaxis|cytolysis|positive regulation of angiogenesis|positive regulation of ch…	path:apla04080,path:apla05168	Neuroactive ligand-receptor interaction|Herpes simplex infection
C5H11orf96	30.6015	41.5737	19.6293	0.472158	-1.08266	0.00446146	0.0199899	Down	5.34822	7.60619	5.68654	3.80238	2.15665	3.11479	GeneID:113843873	chromosome 5 C11orf96 homolog
CALB2	13.2087	1.62683	24.7907	15.2387	3.92966	6.10711e-08	8.43706e-07	Up	0.164088	0	0.166281	1.35018	1.27073	1.22721	GeneID:101789977	calbindin 2	GO:0005509,GO:0005634,GO:0005829,GO:0005921,GO:0030425,GO:0043005,GO:0045202,GO:0051480,GO:0098688,GO:0098793,GO:0099509,GO:0099534,GO:1900271	calcium ion binding|nucleus|cytosol|gap junction|dendrite|neuron projection|synapse|regulation of cytosolic calcium ion concentration|parallel fiber to Purkinje cell synapse|presynapse|regulation of presynaptic cytosolic calcium ion concentration|calcium ion binding involved in regulation of presynaptic cytosolic calcium ion concentration|regulation of long-term synaptic potentiation
CALCOCO2	1641.01	840.847	2441.17	2.90322	1.53766	1.15931e-55	1.23858e-53	Up	9.2638	10.6204	10.702	27.3565	26.1594	26.7165	GeneID:101797184	calcium binding and coiled-coil domain 2	GO:0000421,GO:0005776,GO:0005829,GO:0005856,GO:0031410,GO:0034341,GO:0042803,GO:0048471,GO:0098792,GO:1901098	autophagosome membrane|autophagosome|cytosol|cytoskeleton|cytoplasmic vesicle|response to interferon-gamma|protein homodimerization activity|perinuclear region of cytoplasm|xenophagy|positive regulation of autophagosome maturation	path:apla04137	Mitophagy - animal
CAPN11	430.093	591.662	268.525	0.453849	-1.13972	6.77823e-24	3.13341e-22	Down	13.9568	12.0473	12.9042	5.44966	5.4219	5.63253	GeneID:101793085	calpain 11	GO:0001669,GO:0004198,GO:0005509,GO:0005737,GO:0005886,GO:0006508	acrosomal vesicle|calcium-dependent cysteine-type endopeptidase activity|calcium ion binding|cytoplasm|plasma membrane|proteolysis	path:apla04141,path:apla04210,path:apla04217,path:apla04218	Protein processing in endoplasmic reticulum|Apoptosis|Necroptosis|Cellular senescence
CAPS2	18.5336	12.3508	24.7164	2.0012	1.00086	0.0403857	0.120622	Up	0.121414	0.195127	0.0302406	0.217494	0.219413	0.283145	GeneID:101792186	calcyphosine 2	GO:0005509	calcium ion binding
CARD19	1518.29	992.872	2043.71	2.05839	1.04151	1.1239e-42	9.53529e-41	Up	7.6839	7.85113	8.03307	15.261	15.202	15.2418	GeneID:101805327	caspase recruitment domain family member 19	GO:0005739,GO:0005789,GO:0016021,GO:0031966,GO:0042981	mitochondrion|endoplasmic reticulum membrane|integral component of membrane|mitochondrial membrane|regulation of apoptotic process
CASP7	341.143	88.9656	593.32	6.66909	2.73749	1.3565e-89	2.4154e-87	Up	1.19099	1.59785	2.06275	10.1169	10.1386	10.1156	GeneID:101799962	caspase 7	GO:0004197,GO:0005634,GO:0005654,GO:0005737,GO:0005829,GO:0006508,GO:0006915,GO:0008233,GO:0008234,GO:0072734,GO:0097153,GO:0097194,GO:0097200	cysteine-type endopeptidase activity|nucleus|nucleoplasm|cytoplasm|cytosol|proteolysis|apoptotic process|peptidase activity|cysteine-type peptidase activity|cellular response to staurosporine|cysteine-type endopeptidase activity involved in apoptotic process|execution phase of apoptosis|cysteine-type endopeptidase activity involved in execution phase of apoptosis	path:apla04210	Apoptosis
CAV3	22.8755	32.5086	13.2424	0.407351	-1.29566	0.00349945	0.0163342	Down	1.88045	2.14657	1.65908	1.29788	0.894217	0.491318	GeneID:101792227	caveolin 3	GO:0000139,GO:0001778,GO:0002027,GO:0005198,GO:0005246,GO:0005783,GO:0005887,GO:0005901,GO:0006641,GO:0007015,GO:0007520,GO:0008022,GO:0010614,GO:0010831,GO:0014819,GO:0016010,GO:0017015,GO:0017080,GO:0030154,GO:0030315,GO:0031122,GO:0032947,GO:0035995,GO:0038009,GO:0042383,GO:0042391,GO:0042593,GO:0042632,GO:0043014,GO:0043407,GO:0044325,GO:0044877,GO:0045792,GO:0046716,GO:0051001,GO:0051394,GO:…	Golgi membrane|plasma membrane repair|regulation of heart rate|structural molecule activity|calcium channel regulator activity|endoplasmic reticulum|integral component of plasma membrane|caveola|triglyceride metabolic process|actin filament organization|myoblast fusion|protein C-terminus binding|negative regulation of cardiac muscle hypertrophy|positive regulation of myotube differentiation|regul…	path:apla04144,path:apla04510	Endocytosis|Focal adhesion
CCDC110	12.9816	3.88956	22.0737	5.67511	2.50465	8.88399e-05	0.000659464	Up	0.0167151	0.0736371	0.00828291	0.173758	0.183019	0.148649	GeneID:101793501	coiled-coil domain containing 110	GO:0005634	nucleus
CCDC158	5.2042	1.94184	8.46656	4.36007	2.12435	0.0380137	0.114966	Up	0	0	0.00981065	0.0046206	0.0139914	0.00968108	GeneID:101791603	coiled-coil domain containing 158
CCDC162P	9.73396	5.20275	14.2652	2.74185	1.45515	0.0374364	0.113434	Up	0.0269941	0.0199922	0.0134071	0.0946873	0.065841	0.0601401	GeneID:101801906	coiled-coil domain containing 162, pseudogene
CCDC28A	457.38	155.998	758.762	4.86392	2.28212	3.50765e-84	5.6212e-82	Up	6.9587	7.65736	5.84854	31.0528	30.6899	30.9119	GeneID:101800238	coiled-coil domain containing 28A
CCDC3	71.3919	101.789	40.9944	0.402738	-1.31209	2.03348e-07	2.56147e-06	Down	2.43589	2.09823	1.9037	0.845317	0.650589	1.00333	GeneID:101791844	coiled-coil domain containing 3	GO:0005576,GO:0005783,GO:0010804,GO:0045600,GO:0046889	extracellular region|endoplasmic reticulum|negative regulation of tumor necrosis factor-mediated signaling pathway|positive regulation of fat cell differentiation|positive regulation of lipid biosynthetic process
CCK	12.7359	7.14527	18.3265	2.56484	1.35887	0.0242456	0.0807794	Up	0.201542	0.163063	0.285272	0.719965	0.360547	0.480568	GeneID:101794600	cholecystokinin	GO:0001764,GO:0005179,GO:0005576,GO:0007409,GO:0007586,GO:0030424	neuron migration|hormone activity|extracellular region|axonogenesis|digestion|axon	path:apla04080	Neuroactive ligand-receptor interaction
CCKAR	7.07304	10.7443	3.40178	0.316612	-1.65921	0.0491765	0.141289	Down	0.211634	0.151884	0.114077	0.0535558	0.0751379	0.0568858	GeneID:101802176	cholecystokinin A receptor			path:apla04020,path:apla04080	Calcium signaling pathway|Neuroactive ligand-receptor interaction
CCL19	117.504	2.27791	232.729	102.168	6.6748	1.00234e-88	1.74178e-86	Up	0.0729096	0.107945	0.0362521	5.92801	6.49047	7.17936	GeneID:101793244	C-C motif chemokine ligand 19	GO:0001768,GO:0001771,GO:0002407,GO:0002408,GO:0002548,GO:0002606,GO:0005615,GO:0005622,GO:0006954,GO:0007186,GO:0007257,GO:0008009,GO:0009897,GO:0010560,GO:0030593,GO:0031295,GO:0031732,GO:0031735,GO:0032735,GO:0032760,GO:0034695,GO:0042102,GO:0042379,GO:0043123,GO:0043547,GO:0043552,GO:0045627,GO:0045807,GO:0045860,GO:0046330,GO:0048020,GO:0048247,GO:0048260,GO:0048469,GO:0050718,GO:0050921,GO:…	establishment of T cell polarity|immunological synapse formation|dendritic cell chemotaxis|myeloid dendritic cell chemotaxis|monocyte chemotaxis|positive regulation of dendritic cell antigen processing and presentation|extracellular space|intracellular|inflammatory response|G protein-coupled receptor signaling pathway|activation of JUN kinase activity|chemokine activity|external side of plasma me…
CD274	626.953	65.9578	1187.95	18.0107	4.17079	1.76652e-82	2.73963e-80	Up	1.13488	1.38466	1.20305	16.1353	15.4717	15.375	GeneID:101799097	CD274 molecule	GO:0002845,GO:0005886,GO:0006955,GO:0007165,GO:0007166,GO:0009897,GO:0009986,GO:0016021,GO:0030335,GO:0031295,GO:0031901,GO:0032689,GO:0032693,GO:0034097,GO:0042102,GO:0042130,GO:0046007,GO:0055038,GO:0070062,GO:0071222,GO:1901998,GO:1903556,GO:1905404,GO:2000562,GO:2001181,GO:2001186	positive regulation of tolerance induction to tumor cell|plasma membrane|immune response|signal transduction|cell surface receptor signaling pathway|external side of plasma membrane|cell surface|integral component of membrane|positive regulation of cell migration|T cell costimulation|early endosome membrane|negative regulation of interferon-gamma production|negative regulation of interleukin-10 p…	path:apla04514	Cell adhesion molecules (CAMs)
CD28	4.89144	0.97092	8.81196	9.07589	3.18204	0.00586296	0.0251801	Up	0	0	0.047135	0.0885702	0.105014	0.200615	GeneID:101803044	CD28 molecule	GO:0001772,GO:0002020,GO:0002863,GO:0005070,GO:0006955,GO:0009897,GO:0010629,GO:0014068,GO:0019901,GO:0031295,GO:0032733,GO:0032753,GO:0044214,GO:0045060,GO:0045066,GO:0045086,GO:0045589,GO:0045840,GO:0045944,GO:0046641,GO:0048304,GO:0050852,GO:0051897,GO:0097190,GO:0098636	immunological synapse|protease binding|positive regulation of inflammatory response to antigenic stimulus|SH3/SH2 adaptor activity|immune response|external side of plasma membrane|negative regulation of gene expression|positive regulation of phosphatidylinositol 3-kinase signaling|protein kinase binding|T cell costimulation|positive regulation of interleukin-10 production|positive regulation of i…	path:apla04514,path:apla04672	Cell adhesion molecules (CAMs)|Intestinal immune network for IgA production
CD36	107.191	162.099	52.2834	0.322541	-1.63245	9.97369e-15	2.66884e-13	Down	1.59392	1.8358	1.92125	0.415415	0.562862	0.631837	GeneID:101796495	CD36 molecule	GO:0005794,GO:0006955,GO:0007155,GO:0007166,GO:0007204,GO:0016020,GO:0016021,GO:0016324,GO:0030299,GO:0031526,GO:0031623,GO:0033993,GO:0034197,GO:0044539,GO:0045121,GO:0050702,GO:0050892,GO:0050909,GO:0070374,GO:0070508,GO:0070542,GO:0070543,GO:0071404,GO:0071726,GO:0097009,GO:1900227,GO:1990000	Golgi apparatus|immune response|cell adhesion|cell surface receptor signaling pathway|positive regulation of cytosolic calcium ion concentration|membrane|integral component of membrane|apical plasma membrane|intestinal cholesterol absorption|brush border membrane|receptor internalization|response to lipid|triglyceride transport|long-chain fatty acid import|membrane raft|interleukin-1 beta secreti…	path:apla03320,path:apla04145,path:apla04512,path:apla04920	PPAR signaling pathway|Phagosome|ECM-receptor interaction|Adipocytokine signaling pathway
CD4	3.60343	6.17815	1.0287	0.166506	-2.58636	0.0493389	0.1417	Down	0.0516386	0.0772196	0.0779073	0.0256591	0.0517234	0	GeneID:101790140	CD4 molecule	GO:0002250,GO:0005886,GO:0007155,GO:0015026,GO:0016021,GO:0030217,GO:0045058	adaptive immune response|plasma membrane|cell adhesion|coreceptor activity|integral component of membrane|T cell differentiation|T cell selection	path:apla04060,path:apla04514	Cytokine-cytokine receptor interaction|Cell adhesion molecules (CAMs)
CD44	6405.68	3858.3	8953.06	2.32047	1.21442	8.30893e-88	1.39348e-85	Up	16.7188	17.9515	17.8333	37.0212	37.6692	38.482	GeneID:101797405	CD44 molecule (Indian blood group)			path:apla04512	ECM-receptor interaction
CD7	88.7311	1.29387	176.168	136.156	7.08911	6.33907e-70	7.88175e-68	Up	0	0.0427407	0.0435802	2.66506	2.44336	2.28242	GeneID:101801512	CD7 molecule	GO:0002250,GO:0016021,GO:0038023,GO:0048873	adaptive immune response|integral component of membrane|signaling receptor activity|homeostasis of number of cells within a tissue
CD74	38.8278	22.8001	54.8554	2.40593	1.2666	0.00851274	0.0345468	Up	0.181463	0.0743136	0.163671	0.42235	0.53599	0.421088	GeneID:101803352	CD74 molecule	GO:0000187,GO:0001516,GO:0001540,GO:0001961,GO:0002606,GO:0002792,GO:0002830,GO:0002906,GO:0004896,GO:0005764,GO:0005771,GO:0005783,GO:0005794,GO:0006886,GO:0006952,GO:0008283,GO:0009897,GO:0016021,GO:0016064,GO:0019886,GO:0019955,GO:0030890,GO:0035691,GO:0035692,GO:0035693,GO:0035718,GO:0042609,GO:0042613,GO:0042658,GO:0043066,GO:0043123,GO:0043518,GO:0044183,GO:0045059,GO:0045060,GO:0045581,GO:…	activation of MAPK activity|prostaglandin biosynthetic process|amyloid-beta binding|positive regulation of cytokine-mediated signaling pathway|positive regulation of dendritic cell antigen processing and presentation|negative regulation of peptide secretion|positive regulation of type 2 immune response|negative regulation of mature B cell apoptotic process|cytokine receptor activity|lysosome|mult…	path:apla05168	Herpes simplex infection
CD79B	3.26258	5.8552	0.669956	0.114421	-3.12758	0.0343761	0.106396	Down	0.146206	0.0993994	0.14733	0.0583803	0	0	GeneID:101790676	CD79b molecule	GO:0002250,GO:0004888,GO:0005654,GO:0005794,GO:0005829,GO:0005886,GO:0009617,GO:0009897,GO:0016021,GO:0019815,GO:0030183,GO:0042802,GO:0042803,GO:0050853,GO:0051260	adaptive immune response|transmembrane signaling receptor activity|nucleoplasm|Golgi apparatus|cytosol|plasma membrane|response to bacterium|external side of plasma membrane|integral component of membrane|B cell receptor complex|B cell differentiation|identical protein binding|protein homodimerization activity|B cell receptor signaling pathway|protein homooligomerization
CD83	77.28	24.055	130.505	5.42527	2.4397	5.74893e-21	2.28421e-19	Up	0.351652	0.450729	0.221006	1.59577	1.88612	1.65191	GeneID:101793226	CD83 molecule
CD86	4.57274	1.30284	7.84264	6.01963	2.58968	0.023327	0.078254	Up	0.0529827	0.0259459	0	0.0930301	0.184704	0.0264292	GeneID:101794331	CD86 molecule			path:apla04514,path:apla04620,path:apla04672	Cell adhesion molecules (CAMs)|Toll-like receptor signaling pathway|Intestinal immune network for IgA production
CDC25A	1252.61	819.321	1685.91	2.05769	1.04103	1.11025e-31	7.05423e-30	Up	10.2616	10.271	11.3443	20.0836	21.1449	18.8289	GeneID:101800901	cell division cycle 25A			path:apla04110,path:apla04218,path:apla04914	Cell cycle|Cellular senescence|Progesterone-mediated oocyte maturation
CDH17	23.5874	13.3234	33.8515	2.54075	1.34525	0.0019964	0.0102143	Up	0.114929	0.0948244	0.143113	0.2045	0.152749	0.417674	GeneID:101793802	cadherin 17
CDH26	14.3052	20.4477	8.16279	0.399204	-1.3248	0.0191477	0.0667556	Down	0.0568284	0.0421228	0	0.0135668	0.042278	0.100051	GeneID:101802911	cadherin 26	GO:0005178,GO:0005509,GO:0005886,GO:0005913,GO:0007043,GO:0007156,GO:0008013,GO:0008092,GO:0009986,GO:0016021,GO:0016339,GO:0016342,GO:0034332,GO:0035710,GO:0042803,GO:0044331,GO:0045294,GO:0045296,GO:0070097,GO:0098609	integrin binding|calcium ion binding|plasma membrane|cell-cell adherens junction|cell-cell junction assembly|homophilic cell adhesion via plasma membrane adhesion molecules|beta-catenin binding|cytoskeletal protein binding|cell surface|integral component of membrane|calcium-dependent cell-cell adhesion via plasma membrane cell adhesion molecules|catenin complex|adherens junction organization|CD4-…
CDKN1C	262.296	356.609	167.983	0.471055	-1.08603	2.93793e-05	0.000244088	Down	51.0986	43.6075	59.2966	32.7664	19.2219	30.9237	GeneID:113843792	cyclin dependent kinase inhibitor 1C	GO:0000122,GO:0001501,GO:0001822,GO:0001890,GO:0004861,GO:0005634,GO:0005737,GO:0007050,GO:0007096,GO:0007568,GO:0030099,GO:0030325,GO:0030511,GO:0035264,GO:0042326,GO:0042551,GO:0043010,GO:0044877,GO:0045893,GO:0050680,GO:0055123,GO:0060065,GO:0060669,GO:0071514,GO:1902746	negative regulation of transcription by RNA polymerase II|skeletal system development|kidney development|placenta development|cyclin-dependent protein serine/threonine kinase inhibitor activity|nucleus|cytoplasm|cell cycle arrest|regulation of exit from mitosis|aging|myeloid cell differentiation|adrenal gland development|positive regulation of transforming growth factor beta receptor signaling pa…	path:apla04110	Cell cycle
CFAP52	4.56593	1.62717	7.50469	4.61211	2.20543	0.0476256	0.137727	Up	0.0431562	0	0.0643838	0.160601	0.19213	0.0424813	GeneID:101797668	cilia and flagella associated protein 52	GO:0005737,GO:0031514	cytoplasm|motile cilium
CFAP69	30.868	18.2319	43.5041	2.38616	1.25469	0.000942192	0.00532407	Up	0.309013	0.171968	0.288727	0.544759	0.747611	0.270315	GeneID:101797298	cilia and flagella associated protein 69	GO:0005737,GO:0042048,GO:0097225,GO:0097730,GO:1902093,GO:1905516,GO:1990834	cytoplasm|olfactory behavior|sperm midpiece|non-motile cilium|positive regulation of flagellated sperm motility|positive regulation of fertilization|response to odorant
CFLAR	922.448	505.388	1339.51	2.65045	1.40624	1.58653e-57	1.74676e-55	Up	5.52873	5.23747	4.9813	12.8182	12.8484	13.1195	GeneID:101799915	CASP8 and FADD like apoptosis regulator			path:apla04140,path:apla04210,path:apla04217	Autophagy - animal|Apoptosis|Necroptosis
CGAS	605.319	266.413	944.224	3.54422	1.82547	3.3766e-70	4.23484e-68	Up	3.42248	4.06114	3.68477	12.094	13.0528	12.9495	GeneID:101797757	cyclic GMP-AMP synthase	GO:0002218,GO:0002230,GO:0003677,GO:0003682,GO:0003690,GO:0005524,GO:0005525,GO:0005829,GO:0006974,GO:0010753,GO:0032481,GO:0038001,GO:0043950,GO:0045087,GO:0046872,GO:0051607,GO:0061501,GO:0071360,GO:2000774	activation of innate immune response|positive regulation of defense response to virus by host|DNA binding|chromatin binding|double-stranded DNA binding|ATP binding|GTP binding|cytosol|cellular response to DNA damage stimulus|positive regulation of cGMP-mediated signaling|positive regulation of type I interferon production|paracrine signaling|positive regulation of cAMP-mediated signaling|innate i…	path:apla04623,path:apla05168	Cytosolic DNA-sensing pathway|Herpes simplex infection
CHAF1B	1482.17	944.912	2019.42	2.13715	1.09569	8.85891e-33	5.8611e-31	Up	11.8417	11.615	10.8434	23.0063	24.8264	22.1554	GeneID:101794053	chromatin assembly factor 1 subunit B	GO:0005634,GO:0006260,GO:0006281,GO:0007049,GO:0031497,GO:0033186,GO:0042393	nucleus|DNA replication|DNA repair|cell cycle|chromatin assembly|CAF-1 complex|histone binding
CHRNA2	49.9035	67.2658	32.5412	0.483771	-1.04761	0.000426216	0.00266348	Down	0.904427	0.962006	1.13893	0.655194	0.405436	0.456112	GeneID:101792085	cholinergic receptor nicotinic alpha 2 subunit	GO:0004888,GO:0005887,GO:0007165,GO:0007268,GO:0022848,GO:0030054,GO:0034220,GO:0042391,GO:0043005,GO:0045202,GO:0045211,GO:0050877	transmembrane signaling receptor activity|integral component of plasma membrane|signal transduction|chemical synaptic transmission|acetylcholine-gated cation-selective channel activity|cell junction|ion transmembrane transport|regulation of membrane potential|neuron projection|synapse|postsynaptic membrane|nervous system process	path:apla04080	Neuroactive ligand-receptor interaction
CIITA	15.4786	2.92519	28.032	9.58297	3.26047	0.00325251	0.0153857	Up	0.0161057	0.0236163	0.0159466	0.245871	0.071148	0.119896	GeneID:101803334	class II major histocompatibility complex transactivator			path:apla05164	Influenza A
CILP	69.7793	102.483	37.0756	0.361774	-1.46684	7.26555e-08	9.94222e-07	Down	1.29903	0.999385	0.918939	0.392476	0.445812	0.273958	GeneID:101793418	cartilage intermediate layer protein	GO:0005615,GO:0010629,GO:0043569,GO:0060392,GO:0062023,GO:0071560	extracellular space|negative regulation of gene expression|negative regulation of insulin-like growth factor receptor signaling pathway|negative regulation of SMAD protein signal transduction|collagen-containing extracellular matrix|cellular response to transforming growth factor beta stimulus
CILP2	17.7008	4.23734	31.1642	7.35465	2.87866	2.67715e-07	3.31723e-06	Up	0.0864492	0.0611064	0.0294047	0.664067	0.372462	0.481503	GeneID:101789438	cartilage intermediate layer protein 2	GO:0016311,GO:0070062	dephosphorylation|extracellular exosome
CLDN1	2364.31	1498.95	3229.67	2.15463	1.10744	1.07795e-56	1.16024e-54	Up	33.7409	35.5302	37.3375	72.4059	72.0323	80.5047	GeneID:101797741	claudin 1	GO:0001618,GO:0005198,GO:0005887,GO:0005923,GO:0016323,GO:0016324,GO:0016328,GO:0016338,GO:0042802,GO:0051260,GO:0051291,GO:0061436,GO:0070830	virus receptor activity|structural molecule activity|integral component of plasma membrane|bicellular tight junction|basolateral plasma membrane|apical plasma membrane|lateral plasma membrane|calcium-independent cell-cell adhesion via plasma membrane cell-adhesion molecules|identical protein binding|protein homooligomerization|protein heterooligomerization|establishment of skin barrier|bicellular…	path:apla04514,path:apla04530	Cell adhesion molecules (CAMs)|Tight junction
CLDN20	2.10746	4.21492	0	0	#NAME?	0.0216211	0.0737886	Down	0.00965434	0.00953342	0.0335692	0	0	0	GeneID:101792045	claudin 20	GO:0005198,GO:0005886,GO:0005923,GO:0016021,GO:0016338,GO:0042802	structural molecule activity|plasma membrane|bicellular tight junction|integral component of membrane|calcium-independent cell-cell adhesion via plasma membrane cell-adhesion molecules|identical protein binding	path:apla04514,path:apla04530	Cell adhesion molecules (CAMs)|Tight junction
CLEC3B	165.952	237.157	94.7463	0.399509	-1.3237	7.50428e-08	1.02301e-06	Down	8.58334	6.61426	6.26865	3.33324	1.94729	3.1038	GeneID:101803169	C-type lectin domain family 3 member B	GO:0001503,GO:0001652,GO:0005509,GO:0005615,GO:0005737,GO:0008201,GO:0010756,GO:0030246,GO:0030282,GO:0036143,GO:0071560	ossification|granular component|calcium ion binding|extracellular space|cytoplasm|heparin binding|positive regulation of plasminogen activation|carbohydrate binding|bone mineralization|kringle domain binding|cellular response to transforming growth factor beta stimulus
CMPK2	2792.88	19.8725	5565.88	280.08	8.12969	0	0	Up	0.676725	0.231364	0.439737	121.608	118.446	114.813	GeneID:101790338	cytidine/uridine monophosphate kinase 2	GO:0004127,GO:0004550,GO:0004798,GO:0005524,GO:0005737,GO:0005739,GO:0006165,GO:0006227,GO:0006233,GO:0006235,GO:0009041,GO:0009142,GO:0033862,GO:0071222	cytidylate kinase activity|nucleoside diphosphate kinase activity|thymidylate kinase activity|ATP binding|cytoplasm|mitochondrion|nucleoside diphosphate phosphorylation|dUDP biosynthetic process|dTDP biosynthetic process|dTTP biosynthetic process|uridylate kinase activity|nucleoside triphosphate biosynthetic process|UMP kinase activity|cellular response to lipopolysaccharide	path:apla00240	Pyrimidine metabolism
CMTM6	333.406	130.922	535.89	4.09321	2.03323	1.50433e-54	1.56094e-52	Up	2.61506	3.17727	2.28256	10.6616	10.4664	10.2756	GeneID:113842698	CKLF like MARVEL transmembrane domain containing 6	GO:0005886,GO:0015031,GO:0016020,GO:0016021,GO:0031647,GO:0031901,GO:0032456,GO:0035577,GO:0035579,GO:0043312,GO:0055038	plasma membrane|protein transport|membrane|integral component of membrane|regulation of protein stability|early endosome membrane|endocytic recycling|azurophil granule membrane|specific granule membrane|neutrophil degranulation|recycling endosome membrane
CMTR1	1206.48	396.942	2016.02	5.07886	2.34451	3.83367e-165	1.12843e-162	Up	5.98043	5.79218	5.61388	28.3631	26.9721	28.4454	GeneID:101791717	cap methyltransferase 1	GO:0003676,GO:0004483,GO:0005634,GO:0005654,GO:0005737,GO:0005829,GO:0006370,GO:0080009,GO:0097309	nucleic acid binding|mRNA (nucleoside-2'-O-)-methyltransferase activity|nucleus|nucleoplasm|cytoplasm|cytosol|7-methylguanosine mRNA capping|mRNA methylation|cap1 mRNA methylation
CMTR2	513.299	183.29	843.309	4.60096	2.20193	2.58231e-86	4.23235e-84	Up	1.37006	1.46324	1.35786	5.99753	5.95503	5.8352	GeneID:101802442	cap methyltransferase 2	GO:0004483,GO:0005634,GO:0005737,GO:0006370,GO:0097310	mRNA (nucleoside-2'-O-)-methyltransferase activity|nucleus|cytoplasm|7-methylguanosine mRNA capping|cap2 mRNA methylation
CNP	4097.38	1214.85	6979.91	5.7455	2.52243	1.77932e-104	3.7193e-102	Up	16.1312	16.5686	15.9297	96.9666	83.2187	83.4957	GeneID:101794702	2',3'-cyclic nucleotide 3' phosphodiesterase	GO:0000226,GO:0003723,GO:0004113,GO:0005615,GO:0005634,GO:0005654,GO:0005737,GO:0005741,GO:0005743,GO:0005829,GO:0005874,GO:0005886,GO:0005902,GO:0007268,GO:0007409,GO:0007568,GO:0008344,GO:0009214,GO:0009636,GO:0016020,GO:0021762,GO:0030551,GO:0030900,GO:0031143,GO:0032496,GO:0035748,GO:0035749,GO:0042470,GO:0046902,GO:0048471,GO:0048709,GO:0070062	microtubule cytoskeleton organization|RNA binding|2',3'-cyclic-nucleotide 3'-phosphodiesterase activity|extracellular space|nucleus|nucleoplasm|cytoplasm|mitochondrial outer membrane|mitochondrial inner membrane|cytosol|microtubule|plasma membrane|microvillus|chemical synaptic transmission|axonogenesis|aging|adult locomotory behavior|cyclic nucleotide catabolic process|response to toxic substance…
CNTNAP4	24.0692	13.6378	34.5006	2.52978	1.33901	0.0266552	0.0872754	Up	0.0641512	0.0818197	0.108606	0.248916	0.12955	0.126249	GeneID:101794509	contactin associated protein like 4	GO:0007155,GO:0030054,GO:0030425,GO:0032225,GO:0032228,GO:0042734,GO:0050807,GO:0098982,GO:0099056,GO:2000821	cell adhesion|cell junction|dendrite|regulation of synaptic transmission, dopaminergic|regulation of synaptic transmission, GABAergic|presynaptic membrane|regulation of synapse organization|GABA-ergic synapse|integral component of presynaptic membrane|regulation of grooming behavior
COL6A6	394.814	119.662	669.965	5.59881	2.48512	7.41125e-32	4.75077e-30	Up	0.585565	0.530983	0.485194	3.09618	2.46814	2.81888	GeneID:101802198	collagen type VI alpha 6 chain	GO:0005576,GO:0005581,GO:0007155,GO:0030020,GO:0031012,GO:0062023	extracellular region|collagen trimer|cell adhesion|extracellular matrix structural constituent conferring tensile strength|extracellular matrix|collagen-containing extracellular matrix	path:apla04510,path:apla04512	Focal adhesion|ECM-receptor interaction
COL8A2	518.286	711.683	324.889	0.456508	-1.13129	9.73006e-27	5.14054e-25	Down	7.76197	8.83433	7.45491	4.33383	3.24676	3.44136	GeneID:101792331	collagen type VIII alpha 2 chain	GO:0001525,GO:0005201,GO:0005576,GO:0005581,GO:0005604,GO:0005615,GO:0005788,GO:0030020,GO:0030198,GO:0030674,GO:0031012,GO:0048593,GO:0050673,GO:0062023,GO:0098609	angiogenesis|extracellular matrix structural constituent|extracellular region|collagen trimer|basement membrane|extracellular space|endoplasmic reticulum lumen|extracellular matrix structural constituent conferring tensile strength|extracellular matrix organization|protein binding, bridging|extracellular matrix|camera-type eye morphogenesis|epithelial cell proliferation|collagen-containing extrac…
COL9A3	100.491	26.6462	174.335	6.5426	2.70986	6.25802e-31	3.84083e-29	Up	0.115169	0.128812	0.269556	1.07739	1.04277	1.23692	GeneID:101799887	collagen type IX alpha 3 chain	GO:0005201,GO:0005594,GO:0005615,GO:0008584,GO:0008585,GO:0030198,GO:0031012	extracellular matrix structural constituent|collagen type IX trimer|extracellular space|male gonad development|female gonad development|extracellular matrix organization|extracellular matrix	path:apla04510,path:apla04512	Focal adhesion|ECM-receptor interaction
COLQ	24.7179	34.8134	14.6224	0.420023	-1.25146	0.00326825	0.015445	Down	0.242022	0.226344	0.139684	0.0961515	0.104959	0.0719938	GeneID:101796885	collagen like tail subunit of asymmetric acetylcholinesterase	GO:0001507,GO:0005201,GO:0005581,GO:0005604,GO:0005615,GO:0005886,GO:0008201,GO:0008582,GO:0030054,GO:0030198,GO:0031012,GO:0031594,GO:0043083,GO:0071340,GO:0090150	acetylcholine catabolic process in synaptic cleft|extracellular matrix structural constituent|collagen trimer|basement membrane|extracellular space|plasma membrane|heparin binding|regulation of synaptic growth at neuromuscular junction|cell junction|extracellular matrix organization|extracellular matrix|neuromuscular junction|synaptic cleft|skeletal muscle acetylcholine-gated channel clustering|e…
CPA6	12.8124	18.8153	6.80951	0.361913	-1.46629	0.0178879	0.063219	Down	0.275487	0.711027	0.356692	0.0521678	0.22604	0.166823	GeneID:101804024	carboxypeptidase A6	GO:0004181,GO:0005615,GO:0006508,GO:0008270	metallocarboxypeptidase activity|extracellular space|proteolysis|zinc ion binding
CPM	119.041	161.522	76.5594	0.473987	-1.07708	5.5636e-06	5.44026e-05	Down	4.6515	5.30324	3.66274	1.93797	1.42373	2.45136	GeneID:101789743	carboxypeptidase M	GO:0004180,GO:0004181,GO:0005576,GO:0005615,GO:0005886,GO:0006518,GO:0008270,GO:0009653,GO:0009986,GO:0016485,GO:0031225,GO:0070062	carboxypeptidase activity|metallocarboxypeptidase activity|extracellular region|extracellular space|plasma membrane|peptide metabolic process|zinc ion binding|anatomical structure morphogenesis|cell surface|protein processing|anchored component of membrane|extracellular exosome
CRIP1	126.046	172.55	79.5422	0.460979	-1.11723	4.56222e-09	7.27886e-08	Down	23.1423	24.0858	18.8065	9.01311	14.3601	7.81457	GeneID:113844326	cysteine rich protein 1	GO:0003680,GO:0005737,GO:0008270,GO:0008301,GO:0008630,GO:0010043,GO:0042277,GO:0071236,GO:0071493	AT DNA binding|cytoplasm|zinc ion binding|DNA binding, bending|intrinsic apoptotic signaling pathway in response to DNA damage|response to zinc ion|peptide binding|cellular response to antibiotic|cellular response to UV-B
CRISPLD2	1426.05	907.305	1944.8	2.14349	1.09996	3.86344e-41	3.20243e-39	Up	9.87697	8.16347	8.37083	18.345	17.0954	18.3071	GeneID:101797642	cysteine rich secretory protein LCCL domain containing 2	GO:0005539,GO:0005576,GO:0005615,GO:0008201,GO:0030133,GO:0030198,GO:0030324,GO:0031012,GO:0034774,GO:0043312,GO:0060325,GO:0070062,GO:1904813	glycosaminoglycan binding|extracellular region|extracellular space|heparin binding|transport vesicle|extracellular matrix organization|lung development|extracellular matrix|secretory granule lumen|neutrophil degranulation|face morphogenesis|extracellular exosome|ficolin-1-rich granule lumen
CRTAM	7.10762	2.93519	11.2801	3.84305	1.94225	0.036624	0.111622	Up	0.0575764	0	0.0459676	0.0464813	0.168672	0.0803571	GeneID:101802573	cytotoxic and regulatory T cell molecule	GO:0002250,GO:0002355,GO:0002860,GO:0005102,GO:0005886,GO:0008037,GO:0016021,GO:0042802,GO:0045954,GO:0050715,GO:0050776,GO:0051606	adaptive immune response|detection of tumor cell|positive regulation of natural killer cell mediated cytotoxicity directed against tumor cell target|signaling receptor binding|plasma membrane|cell recognition|integral component of membrane|identical protein binding|positive regulation of natural killer cell mediated cytotoxicity|positive regulation of cytokine secretion|regulation of immune respo…
CRYAB	73.1257	98.12	48.1315	0.490537	-1.02757	3.07027e-05	0.000254059	Down	4.65009	6.51531	7.37239	2.74084	2.13121	2.91093	GeneID:101800794	crystallin alpha B	GO:0001540,GO:0001666,GO:0002088,GO:0005212,GO:0005634,GO:0005739,GO:0005829,GO:0005886,GO:0007021,GO:0007517,GO:0010629,GO:0030018,GO:0032387,GO:0032463,GO:0042542,GO:0042803,GO:0043154,GO:0043209,GO:0044877,GO:0046872,GO:0050821,GO:0051082,GO:0051260,GO:0060561,GO:0071480,GO:1905907	amyloid-beta binding|response to hypoxia|lens development in camera-type eye|structural constituent of eye lens|nucleus|mitochondrion|cytosol|plasma membrane|tubulin complex assembly|muscle organ development|negative regulation of gene expression|Z disc|negative regulation of intracellular transport|negative regulation of protein homooligomerization|response to hydrogen peroxide|protein homodimer…	path:apla04141	Protein processing in endoplasmic reticulum
CSF3R	14.0829	7.80567	20.3602	2.60838	1.38316	0.0154742	0.0564023	Up	0.157301	0.141868	0.15906	0.348188	0.191059	0.390403	GeneID:101791747	colony stimulating factor 3 receptor			path:apla04060	Cytokine-cytokine receptor interaction
CXXC4	50.238	69.5058	30.9703	0.445579	-1.16625	8.14369e-05	0.000611752	Down	0.434486	0.695665	0.491669	0.105106	0.324342	0.295304	GeneID:106020086	CXXC finger protein 4	GO:0003677,GO:0005737,GO:0008270,GO:0016055	DNA binding|cytoplasm|zinc ion binding|Wnt signaling pathway	path:apla04310	Wnt signaling pathway
CYGB	1557.33	881.725	2232.94	2.53246	1.34054	4.56122e-69	5.52827e-67	Up	29.5631	29.2973	29.1325	81.6175	74.1885	76.9465	GeneID:101796982	cytoglobin	GO:0001666,GO:0004096,GO:0004601,GO:0005344,GO:0005506,GO:0005829,GO:0006979,GO:0008941,GO:0010764,GO:0015671,GO:0016607,GO:0019395,GO:0019825,GO:0020037,GO:0032966,GO:0043005,GO:0043025,GO:0047888,GO:0050999,GO:2000490	response to hypoxia|catalase activity|peroxidase activity|oxygen carrier activity|iron ion binding|cytosol|response to oxidative stress|nitric oxide dioxygenase activity|negative regulation of fibroblast migration|oxygen transport|nuclear speck|fatty acid oxidation|oxygen binding|heme binding|negative regulation of collagen biosynthetic process|neuron projection|neuronal cell body|fatty acid pero…
CYSLTR2	14.6249	5.84657	23.4032	4.0029	2.00105	0.00414935	0.0188432	Up	0.12077	0.0914327	0.24234	0.456979	0.508776	0.749956	GeneID:101805449	cysteinyl leukotriene receptor 2	GO:0004966,GO:0004974,GO:0005886,GO:0005887,GO:0006955,GO:0007186,GO:0007218,GO:0008528	galanin receptor activity|leukotriene receptor activity|plasma membrane|integral component of plasma membrane|immune response|G protein-coupled receptor signaling pathway|neuropeptide signaling pathway|G protein-coupled peptide receptor activity	path:apla04020,path:apla04080	Calcium signaling pathway|Neuroactive ligand-receptor interaction
CYTL1	72.4693	103.265	41.6732	0.403555	-1.30916	0.0054859	0.0238108	Down	4.64867	4.8951	8.26131	2.88148	2.35801	1.64268	GeneID:101804514	cytokine like 1	GO:0002062,GO:0005102,GO:0005615,GO:0007165,GO:0045944,GO:0048839,GO:0050650,GO:0051091,GO:1990079	chondrocyte differentiation|signaling receptor binding|extracellular space|signal transduction|positive regulation of transcription by RNA polymerase II|inner ear development|chondroitin sulfate proteoglycan biosynthetic process|positive regulation of DNA-binding transcription factor activity|cartilage homeostasis
DACT2	340.738	527.451	154.025	0.292017	-1.77587	9.03132e-44	7.70761e-42	Down	6.64118	7.13967	6.58644	2.07628	1.85794	2.00192	GeneID:101791215	dishevelled binding antagonist of beta catenin 2	GO:0002244,GO:0003382,GO:0005080,GO:0005737,GO:0005739,GO:0007162,GO:0008013,GO:0008134,GO:0030111,GO:0043588,GO:0051018,GO:0070097,GO:0072061,GO:1900108	hematopoietic progenitor cell differentiation|epithelial cell morphogenesis|protein kinase C binding|cytoplasm|mitochondrion|negative regulation of cell adhesion|beta-catenin binding|transcription factor binding|regulation of Wnt signaling pathway|skin development|protein kinase A binding|delta-catenin binding|inner medullary collecting duct development|negative regulation of nodal signaling path…
DAW1	47.1265	30.6026	63.6504	2.0799	1.05651	0.000493607	0.00303336	Up	0.884844	0.341257	0.519805	1.40938	0.979746	1.19102	GeneID:101803583	dynein assembly factor with WD repeats 1	GO:0005929	cilium
DCAF17	963.675	612.297	1315.05	2.14774	1.10282	9.6459e-38	7.40015e-36	Up	6.69453	7.25414	6.73495	13.1189	13.4388	13.5983	GeneID:101792823	DDB1 and CUL4 associated factor 17	GO:0005654,GO:0005730,GO:0005829,GO:0016021,GO:0016567,GO:0043687,GO:0080008	nucleoplasm|nucleolus|cytosol|integral component of membrane|protein ubiquitination|post-translational protein modification|Cul4-RING E3 ubiquitin ligase complex
DDX58	1965.77	146.589	3784.95	25.8201	4.69042	0	0	Up	1.82524	1.52195	2.08685	41.0154	35.858	39.0545	GeneID:101789567	DExD/H-box helicase 58	GO:0002230,GO:0002735,GO:0003690,GO:0003725,GO:0003727,GO:0004386,GO:0005524,GO:0005737,GO:0005829,GO:0005923,GO:0008270,GO:0009597,GO:0009615,GO:0010628,GO:0015629,GO:0016032,GO:0016579,GO:0030334,GO:0031625,GO:0032480,GO:0032587,GO:0032725,GO:0032727,GO:0032728,GO:0032755,GO:0032757,GO:0034344,GO:0035549,GO:0039528,GO:0039529,GO:0042802,GO:0043330,GO:0045087,GO:0045944,GO:0051091,GO:0051607,GO:…	positive regulation of defense response to virus by host|positive regulation of myeloid dendritic cell cytokine production|double-stranded DNA binding|double-stranded RNA binding|single-stranded RNA binding|helicase activity|ATP binding|cytoplasm|cytosol|bicellular tight junction|zinc ion binding|detection of virus|response to virus|positive regulation of gene expression|actin cytoskeleton|viral …	path:apla04622,path:apla04623,path:apla05164,path:apla05168	RIG-I-like receptor signaling pathway|Cytosolic DNA-sensing pathway|Influenza A|Herpes simplex infection
DDX60	2833.37	11.3536	5655.38	498.111	8.96032	0	0	Up	0.0374655	0.0798766	0.0621644	29.7918	31.1372	29.4586	GeneID:101790417	DExD/H-box helicase 60	GO:0003690,GO:0003725,GO:0003727,GO:0004386,GO:0005524,GO:0005737,GO:0005829,GO:0009615,GO:0045087,GO:0045111,GO:0051607,GO:1900245,GO:1900246	double-stranded DNA binding|double-stranded RNA binding|single-stranded RNA binding|helicase activity|ATP binding|cytoplasm|cytosol|response to virus|innate immune response|intermediate filament cytoskeleton|defense response to virus|positive regulation of MDA-5 signaling pathway|positive regulation of RIG-I signaling pathway
DENND2D	245.77	50.6208	440.919	8.71023	3.12271	6.86602e-83	1.0764e-80	Up	0.436172	0.690008	0.841227	6.02825	5.6829	5.52756	GeneID:101799913	DENN domain containing 2D	GO:0005654,GO:0005829,GO:0017112	nucleoplasm|cytosol|Rab guanyl-nucleotide exchange factor activity
DENND3	693.644	410.081	977.206	2.38296	1.25275	3.80511e-39	3.0321e-37	Up	3.1704	3.27603	3.44998	7.48956	7.02005	7.48239	GeneID:101797304	DENN domain containing 3	GO:0005737,GO:0008333,GO:0017112,GO:0044257	cytoplasm|endosome to lysosome transport|Rab guanyl-nucleotide exchange factor activity|cellular protein catabolic process
DGKB	38.1772	22.8246	53.5298	2.34527	1.22975	0.000759828	0.00442788	Up	0.215936	0.0904145	0.0381701	0.185004	0.164975	0.336973	GeneID:101797346	diacylglycerol kinase beta	GO:0003951,GO:0004143,GO:0005509,GO:0005524,GO:0005737,GO:0005829,GO:0005886,GO:0007205,GO:0009617,GO:0030168,GO:0035556,GO:0046486,GO:0046834,GO:0050804,GO:0098685,GO:0098978,GO:0099175	NAD+ kinase activity|diacylglycerol kinase activity|calcium ion binding|ATP binding|cytoplasm|cytosol|plasma membrane|protein kinase C-activating G protein-coupled receptor signaling pathway|response to bacterium|platelet activation|intracellular signal transduction|glycerolipid metabolic process|lipid phosphorylation|modulation of chemical synaptic transmission|Schaffer collateral - CA1 synapse|…	path:apla00561,path:apla00564,path:apla04070	Glycerolipid metabolism|Glycerophospholipid metabolism|Phosphatidylinositol signaling system
DHRS3	2175.87	3278.87	1072.86	0.327204	-1.61174	4.15213e-111	8.93823e-109	Down	13.07	13.2766	13.2359	4.0593	3.7311	4.19459	GeneID:101792259	dehydrogenase/reductase 3	GO:0000166,GO:0001523,GO:0003151,GO:0004745,GO:0005789,GO:0005811,GO:0007601,GO:0009055,GO:0016021,GO:0030278,GO:0042572,GO:0042622,GO:0048387,GO:0052650,GO:0060021,GO:0060349,GO:0060411	nucleotide binding|retinoid metabolic process|outflow tract morphogenesis|retinol dehydrogenase activity|endoplasmic reticulum membrane|lipid droplet|visual perception|electron transfer activity|integral component of membrane|regulation of ossification|retinol metabolic process|photoreceptor outer segment membrane|negative regulation of retinoic acid receptor signaling pathway|NADP-retinol dehydr…	path:apla00830	Retinol metabolism
DHX58	988.768	25.6535	1951.88	76.0863	6.24957	4.31105e-280	1.72717e-277	Up	0.547685	0.990745	0.474745	55.0874	47.2135	53.4599	GeneID:101792382	DExH-box helicase 58	GO:0003677,GO:0003725,GO:0003727,GO:0004386,GO:0005524,GO:0005737,GO:0008270,GO:0009615,GO:0009617,GO:0016032,GO:0032480,GO:0032481,GO:0039534,GO:0039536,GO:0045087,GO:0045088,GO:0045824,GO:0051607,GO:1900245,GO:1900246	DNA binding|double-stranded RNA binding|single-stranded RNA binding|helicase activity|ATP binding|cytoplasm|zinc ion binding|response to virus|response to bacterium|viral process|negative regulation of type I interferon production|positive regulation of type I interferon production|negative regulation of MDA-5 signaling pathway|negative regulation of RIG-I signaling pathway|innate immune response…	path:apla04622	RIG-I-like receptor signaling pathway
DIO3	1627.51	791.887	2463.14	3.11047	1.63713	4.73343e-30	2.8446e-28	Up	38.7097	38.1813	36.5618	114.276	118.653	113.712	GeneID:101801522	iodothyronine deiodinase 3	GO:0004800,GO:0005886,GO:0010008,GO:0016021,GO:0042403,GO:0042446	thyroxine 5'-deiodinase activity|plasma membrane|endosome membrane|integral component of membrane|thyroid hormone metabolic process|hormone biosynthetic process
DLL4	122.733	48.7828	196.684	4.03183	2.01143	2.33239e-23	1.04472e-21	Up	0.562836	0.5132	0.378068	2.15269	1.69478	1.8442	GeneID:101792399	delta like canonical Notch ligand 4	GO:0000122,GO:0001525,GO:0001569,GO:0001974,GO:0003180,GO:0003208,GO:0003209,GO:0003222,GO:0003344,GO:0005112,GO:0005509,GO:0005886,GO:0007165,GO:0007219,GO:0007601,GO:0008015,GO:0008285,GO:0010596,GO:0010628,GO:0010629,GO:0016021,GO:0030217,GO:0035912,GO:0035924,GO:0044344,GO:0045746,GO:0045747,GO:0060579,GO:0061074,GO:0061314,GO:0090051,GO:1903588,GO:2000179	negative regulation of transcription by RNA polymerase II|angiogenesis|branching involved in blood vessel morphogenesis|blood vessel remodeling|aortic valve morphogenesis|cardiac ventricle morphogenesis|cardiac atrium morphogenesis|ventricular trabecula myocardium morphogenesis|pericardium morphogenesis|Notch binding|calcium ion binding|plasma membrane|signal transduction|Notch signaling pathway|…	path:apla04330	Notch signaling pathway
DOK5	253.259	123.828	382.69	3.0905	1.62784	5.9163e-30	3.54069e-28	Up	1.85351	1.49102	1.86288	5.21086	4.30898	4.65646	GeneID:101796412	docking protein 5	GO:0005829,GO:0007169,GO:0007411,GO:0043410,GO:0051386	cytosol|transmembrane receptor protein tyrosine kinase signaling pathway|axon guidance|positive regulation of MAPK cascade|regulation of neurotrophin TRK receptor signaling pathway
DRAM1	1109.57	158.319	2060.81	13.0168	3.70231	1.24359e-98	2.45702e-96	Up	4.92029	4.70526	3.70002	50.7027	47.7414	51.1711	GeneID:101793314	DNA damage regulated autophagy modulator 1	GO:0005737,GO:0005764,GO:0005765,GO:0006914,GO:0006915,GO:0010506,GO:0016021	cytoplasm|lysosome|lysosomal membrane|autophagy|apoptotic process|regulation of autophagy|integral component of membrane
DRD1	19.8812	28.9613	10.801	0.372947	-1.42296	0.00319198	0.0151512	Down	0.394441	0.20235	0.258778	0.0988782	0.0562763	0.12379	GeneID:101797733	dopamine receptor D1	GO:0004952,GO:0005622,GO:0005887,GO:0007189,GO:0042311	dopamine neurotransmitter receptor activity|intracellular|integral component of plasma membrane|adenylate cyclase-activating G protein-coupled receptor signaling pathway|vasodilation	path:apla04020,path:apla04080,path:apla04540	Calcium signaling pathway|Neuroactive ligand-receptor interaction|Gap junction
DTX3L	2704.64	161.803	5247.47	32.4313	5.01932	0	0	Up	1.66529	2.14607	1.58543	54.9618	53.0757	52.6946	GeneID:110352909	deltex E3 ubiquitin ligase 3L	GO:0000209,GO:0002230,GO:0004842,GO:0004857,GO:0005634,GO:0005654,GO:0005737,GO:0005764,GO:0005765,GO:0005829,GO:0006302,GO:0006511,GO:0006974,GO:0007219,GO:0008047,GO:0008333,GO:0010390,GO:0015031,GO:0019899,GO:0031901,GO:0032092,GO:0032991,GO:0033522,GO:0033523,GO:0035563,GO:0042393,GO:0044389,GO:0045087,GO:0045893,GO:0046872,GO:0051444,GO:0051607,GO:0051865,GO:0070936,GO:0097677,GO:1900182,GO:…	protein polyubiquitination|positive regulation of defense response to virus by host|ubiquitin-protein transferase activity|enzyme inhibitor activity|nucleus|nucleoplasm|cytoplasm|lysosome|lysosomal membrane|cytosol|double-strand break repair|ubiquitin-dependent protein catabolic process|cellular response to DNA damage stimulus|Notch signaling pathway|enzyme activator activity|endosome to lysosome…	path:apla04330	Notch signaling pathway
DUSP26	47.0497	65.3053	28.7941	0.440914	-1.18143	0.000122972	0.000886373	Down	1.98557	2.08539	2.37738	1.44186	0.715019	1.00823	GeneID:101804841	dual specificity phosphatase 26	GO:0000122,GO:0001102,GO:0002039,GO:0004647,GO:0004725,GO:0005634,GO:0005794,GO:0008138,GO:0044387,GO:0045785,GO:0070373,GO:1902310	negative regulation of transcription by RNA polymerase II|RNA polymerase II activating transcription factor binding|p53 binding|phosphoserine phosphatase activity|protein tyrosine phosphatase activity|nucleus|Golgi apparatus|protein tyrosine/serine/threonine phosphatase activity|negative regulation of protein kinase activity by regulation of protein phosphorylation|positive regulation of cell adh…
EEF1AKMT4	28.9699	39.3734	18.5665	0.471549	-1.08452	0.00588762	0.0252729	Down	3.96245	2.79968	2.89539	2.46725	0.367315	1.68637	GeneID:101800016	EEF1A lysine methyltransferase 4	GO:0008168,GO:0016279	methyltransferase activity|protein-lysine N-methyltransferase activity
EFCAB3	5.93826	0.646936	11.2296	17.3581	4.11754	0.000321368	0.00207572	Up	0	0	0.00900908	0.051857	0.087022	0.0981844	GeneID:101804416	EF-hand calcium binding domain 3	GO:0005509	calcium ion binding
EGLN3	3110.82	1956.06	4265.57	2.18069	1.12478	2.1856e-64	2.50181e-62	Up	21.8119	22.7475	22.3591	42.9744	45.0285	45.4955	GeneID:101803442	egl-9 family hypoxia inducible factor 3	GO:0005506,GO:0005634,GO:0005737,GO:0005829,GO:0006915,GO:0006919,GO:0006974,GO:0016706,GO:0018126,GO:0018401,GO:0031418,GO:0031543,GO:0031545,GO:0042127,GO:0043523,GO:1990830	iron ion binding|nucleus|cytoplasm|cytosol|apoptotic process|activation of cysteine-type endopeptidase activity involved in apoptotic process|cellular response to DNA damage stimulus|oxidoreductase activity, acting on paired donors, with incorporation or reduction of molecular oxygen, 2-oxoglutarate as one donor, and incorporation of one atom each of oxygen into both donors|protein hydroxylation|…
EMILIN3	134.753	186.66	82.8459	0.443832	-1.17191	2.73827e-10	4.94294e-09	Down	3.60739	3.03997	3.28169	1.69544	1.51832	1.20671	GeneID:101798326	elastin microfibril interfacer 3	GO:0005201,GO:0005737,GO:0010811,GO:0031012	extracellular matrix structural constituent|cytoplasm|positive regulation of cell-substrate adhesion|extracellular matrix
EML6	543.024	360.687	725.361	2.01105	1.00795	1.72521e-22	7.47227e-21	Up	1.46461	1.51033	1.46903	2.6815	2.66847	2.58812	GeneID:101796882	EMAP like 6	GO:0005737,GO:0005874,GO:0008017,GO:0015630	cytoplasm|microtubule|microtubule binding|microtubule cytoskeleton
ENHO	32.6806	44.7625	20.5986	0.460177	-1.11974	0.0322095	0.101233	Down	2.17619	5.32773	3.8471	2.3428	0.897901	2.61004	GeneID:113840143	energy homeostasis associated
EPSTI1	6928.78	39.3095	13818.2	351.524	8.45748	0	0	Up	0.723564	0.731985	1.00112	237.141	266.963	242.188	GeneID:101802974	epithelial stromal interaction 1
EPYC	29.8789	18.1825	41.5752	2.28655	1.19317	0.0239044	0.0798272	Up	0.418556	0.744891	0.480139	1.52169	0.75301	0.994412	GeneID:101804801	epiphycan	GO:0005576	extracellular region
ERAP1	764.757	370.349	1159.17	3.12993	1.64613	8.34493e-28	4.54184e-26	Up	7.84216	9.09354	8.65301	25.3597	25.0612	23.2538	GeneID:101796678	endoplasmic reticulum aminopeptidase 1	GO:0001525,GO:0002250,GO:0002474,GO:0004175,GO:0004177,GO:0005138,GO:0005151,GO:0005576,GO:0005615,GO:0005737,GO:0005783,GO:0005788,GO:0005789,GO:0005829,GO:0006508,GO:0006509,GO:0008217,GO:0008235,GO:0008270,GO:0009617,GO:0016020,GO:0016021,GO:0019885,GO:0042277,GO:0043171,GO:0045088,GO:0045444,GO:0045766,GO:0070006,GO:0070062	angiogenesis|adaptive immune response|antigen processing and presentation of peptide antigen via MHC class I|endopeptidase activity|aminopeptidase activity|interleukin-6 receptor binding|interleukin-1, type II receptor binding|extracellular region|extracellular space|cytoplasm|endoplasmic reticulum|endoplasmic reticulum lumen|endoplasmic reticulum membrane|cytosol|proteolysis|membrane protein ect…
ERBB3	22.8507	32.1612	13.5403	0.421013	-1.24806	0.0049635	0.0219126	Down	2.94364	3.37407	2.601	1.90495	1.03829	1.40982	GeneID:101791759	erb-b2 receptor tyrosine kinase 3	GO:0004714,GO:0005524,GO:0007169,GO:0016021,GO:0038132	transmembrane receptor protein tyrosine kinase activity|ATP binding|transmembrane receptor protein tyrosine kinase signaling pathway|integral component of membrane|neuregulin binding
EXOC3L4	3.22651	0.651422	5.80159	8.90605	3.15479	0.0328094	0.102662	Up	0.00888211	0.00885719	0	0.00889799	0.0696588	0.0615774	GeneID:101795721	exocyst complex component 3 like 4	GO:0000145,GO:0000149,GO:0006887,GO:0051601	exocyst|SNARE binding|exocytosis|exocyst localization
F13A1	59.6962	85.4666	33.9257	0.396947	-1.33298	1.25758e-06	1.38037e-05	Down	0.685839	0.773638	0.657371	0.205234	0.256102	0.31187	GeneID:101800928	coagulation factor XIII A chain	GO:0003810,GO:0005576,GO:0005737,GO:0007596,GO:0018149,GO:0042060,GO:0046872,GO:0072378	protein-glutamine gamma-glutamyltransferase activity|extracellular region|cytoplasm|blood coagulation|peptide cross-linking|wound healing|metal ion binding|blood coagulation, fibrin clot formation
FADD	818.367	314.896	1321.84	4.1977	2.0696	1.7983e-65	2.07495e-63	Up	6.86932	7.14585	6.87007	27.5509	26.4765	26.2698	GeneID:101801863	Fas associated via death domain	GO:0001916,GO:0002020,GO:0002821,GO:0005123,GO:0005164,GO:0005634,GO:0005737,GO:0005829,GO:0005886,GO:0006915,GO:0030217,GO:0031264,GO:0031265,GO:0032729,GO:0032757,GO:0032760,GO:0032813,GO:0032991,GO:0033077,GO:0033612,GO:0035877,GO:0036462,GO:0042104,GO:0042802,GO:0043005,GO:0043029,GO:0043065,GO:0043123,GO:0043278,GO:0044297,GO:0044877,GO:0045087,GO:0045121,GO:0045651,GO:0045862,GO:0045944,GO:…	positive regulation of T cell mediated cytotoxicity|protease binding|positive regulation of adaptive immune response|death receptor binding|tumor necrosis factor receptor binding|nucleus|cytoplasm|cytosol|plasma membrane|apoptotic process|T cell differentiation|death-inducing signaling complex|CD95 death-inducing signaling complex|positive regulation of interferon-gamma production|positive regula…	path:apla04210,path:apla04217,path:apla04620,path:apla04621,path:apla04622,path:apla05168	Apoptosis|Necroptosis|Toll-like receptor signaling pathway|NOD-like receptor signaling pathway|RIG-I-like receptor signaling pathway|Herpes simplex infection
FAM183A	25.8673	36.6984	15.0361	0.409722	-1.28728	0.00274639	0.0133371	Down	2.17835	3.63177	1.90677	0.534243	2.2317	0.901347	GeneID:101793323	family with sequence similarity 183 member A	GO:0005737,GO:0036064,GO:0097546	cytoplasm|ciliary basal body|ciliary base
FAM208B	703.674	466.169	941.179	2.01897	1.01362	1.17886e-15	3.39375e-14	Up	2.60877	2.36103	2.69877	5.14669	4.85378	5.29687	GeneID:101790459	family with sequence similarity 208 member B	GO:0005634,GO:0005654,GO:0005829	nucleus|nucleoplasm|cytosol
FAM43A	165.437	220.607	110.266	0.499829	-1.00049	2.59159e-09	4.23792e-08	Down	18.0603	20.5392	21.6135	12.4355	9.82413	11.8033	GeneID:106015344	family with sequence similarity 43 member A
FBH1	1803.06	237.233	3368.89	14.2008	3.8279	0	0	Up	2.45985	3.0447	2.512	37.5017	34.7199	34.3863	GeneID:101803598	F-box DNA helicase 1	GO:0000724,GO:0000737,GO:0000785,GO:0001934,GO:0003678,GO:0003690,GO:0003697,GO:0005524,GO:0005634,GO:0006974,GO:0008219,GO:0015616,GO:0016567,GO:0019005,GO:0031146,GO:0031297,GO:0035562,GO:0043138,GO:0043140,GO:0043224,GO:0048478,GO:0072429,GO:1902231,GO:2000042	double-strand break repair via homologous recombination|DNA catabolic process, endonucleolytic|chromatin|positive regulation of protein phosphorylation|DNA helicase activity|double-stranded DNA binding|single-stranded DNA binding|ATP binding|nucleus|cellular response to DNA damage stimulus|cell death|DNA translocase activity|protein ubiquitination|SCF ubiquitin ligase complex|SCF-dependent protea…
FBXO33	103.868	61.7518	145.984	2.36404	1.24125	3.2219e-09	5.22129e-08	Up	1.20291	1.08385	1.59471	3.00773	3.15571	2.55167	GeneID:113843729	F-box protein 33	GO:0016567	protein ubiquitination
FGF22	11.7894	18.1656	5.41316	0.297989	-1.74667	0.00959849	0.0381386	Down	1.06865	1.93066	2.54791	0.153084	0.138674	1.3378	GeneID:113845652	fibroblast growth factor 22	GO:0005104,GO:0005730,GO:0005794,GO:0008083,GO:0008543,GO:0009986	fibroblast growth factor receptor binding|nucleolus|Golgi apparatus|growth factor activity|fibroblast growth factor receptor signaling pathway|cell surface	path:apla04010,path:apla04810	MAPK signaling pathway|Regulation of actin cytoskeleton
FGF4	12.0534	1.6358	22.4711	13.7371	3.78	2.0328e-05	0.000174726	Up	0.0649449	0.0160806	0	0.172216	0.44537	0.442862	GeneID:113843807	fibroblast growth factor 4	GO:0005104,GO:0005576,GO:0007275,GO:0008083,GO:0008543,GO:0030154,GO:0051781	fibroblast growth factor receptor binding|extracellular region|multicellular organism development|growth factor activity|fibroblast growth factor receptor signaling pathway|cell differentiation|positive regulation of cell division	path:apla04010,path:apla04810	MAPK signaling pathway|Regulation of actin cytoskeleton
FGF7	2798.93	1316.5	4281.36	3.25209	1.70137	1.65213e-21	6.69344e-20	Up	20.008	21.6648	23.8866	54.0353	60.212	53.9565	GeneID:101795837	fibroblast growth factor 7	GO:0000165,GO:0004713,GO:0005088,GO:0005104,GO:0005576,GO:0005794,GO:0007165,GO:0008083,GO:0008201,GO:0008284,GO:0008543,GO:0008544,GO:0009611,GO:0010463,GO:0010838,GO:0016303,GO:0031069,GO:0031532,GO:0034394,GO:0042056,GO:0045893,GO:0046934,GO:0050679,GO:0050731,GO:0050918,GO:0051549,GO:0051781,GO:0051897,GO:0060445,GO:0060501,GO:0060665,GO:0061033	MAPK cascade|protein tyrosine kinase activity|Ras guanyl-nucleotide exchange factor activity|fibroblast growth factor receptor binding|extracellular region|Golgi apparatus|signal transduction|growth factor activity|heparin binding|positive regulation of cell proliferation|fibroblast growth factor receptor signaling pathway|epidermis development|response to wounding|mesenchymal cell proliferation|…	path:apla04010,path:apla04810	MAPK signaling pathway|Regulation of actin cytoskeleton
FGFBP3	11.6106	19.1673	4.05392	0.211503	-2.24125	0.000792305	0.00458748	Down	7.62492	12.7006	8.37822	2.34365	1.08906	2.87925	GeneID:113844012	fibroblast growth factor binding protein 3	GO:0005576,GO:0005622,GO:0007267,GO:0008201,GO:0017134,GO:0030534,GO:0031646,GO:0043117,GO:0045743,GO:0070374	extracellular region|intracellular|cell-cell signaling|heparin binding|fibroblast growth factor binding|adult behavior|positive regulation of neurological system process|positive regulation of vascular permeability|positive regulation of fibroblast growth factor receptor signaling pathway|positive regulation of ERK1 and ERK2 cascade
FHAD1	57.4704	31.8044	83.1363	2.61399	1.38625	7.67139e-07	8.73969e-06	Up	0.0939791	0.117625	0.153471	0.319434	0.266003	0.286851	GeneID:101789763	forkhead associated phosphopeptide binding domain 1
FMOD	7.37955	12.3756	2.38347	0.192594	-2.37637	0.00571583	0.0246677	Down	0.265054	0.151704	0.147352	0.0383001	0.0474013	0.0309266	GeneID:101789778	fibromodulin	GO:0062023	collagen-containing extracellular matrix	path:apla04350	TGF-beta signaling pathway
FNDC1	2782.21	3718.16	1846.25	0.49655	-1.00999	8.53144e-38	6.58016e-36	Down	17.8301	15.8396	16.133	8.2608	7.63355	8.05516	GeneID:101794732	fibronectin type III domain containing 1	GO:0005576,GO:0016607	extracellular region|nuclear speck
FOXA2	17.3661	4.87979	29.8525	6.11756	2.61296	2.29708e-06	2.39904e-05	Up	0.140308	0.0985279	0.094008	1.08262	0.717926	0.670424	GeneID:101795285	forkhead box A2	GO:0001707,GO:0003700,GO:0005634,GO:0008134,GO:0019904,GO:0043565,GO:0045893	mesoderm formation|DNA-binding transcription factor activity|nucleus|transcription factor binding|protein domain specific binding|sequence-specific DNA binding|positive regulation of transcription, DNA-templated
FOXO6	145.233	204.858	85.6082	0.41789	-1.2588	3.2363e-12	7.04907e-11	Down	2.79897	2.4888	2.5645	1.74605	0.765616	1.02084	GeneID:113839807	forkhead box O6	GO:0000122,GO:0000978,GO:0000981,GO:0001221,GO:0001227,GO:0001228,GO:0001542,GO:0001544,GO:0001547,GO:0001556,GO:0003677,GO:0003700,GO:0005634,GO:0005654,GO:0005737,GO:0005739,GO:0005741,GO:0005759,GO:0005829,GO:0006355,GO:0006357,GO:0006390,GO:0006417,GO:0007568,GO:0008013,GO:0008134,GO:0008286,GO:0016020,GO:0019901,GO:0030330,GO:0030336,GO:0031490,GO:0031667,GO:0032991,GO:0033209,GO:0034246,GO:…	negative regulation of transcription by RNA polymerase II|RNA polymerase II proximal promoter sequence-specific DNA binding|DNA-binding transcription factor activity, RNA polymerase II-specific|transcription cofactor binding|DNA-binding transcription repressor activity, RNA polymerase II-specific|DNA-binding transcription activator activity, RNA polymerase II-specific|ovulation from ovarian folli…	path:apla04068	FoxO signaling pathway
FOXS1	9.95924	2.27825	17.6402	7.74289	2.95287	0.000107408	0.00078398	Up	0.0999812	0.0716291	0.0676599	0.817975	0.566641	0.72453	GeneID:113845714	forkhead box S1	GO:0000978,GO:0000981,GO:0001078,GO:0001568,GO:0003677,GO:0003700,GO:0005634,GO:0006357,GO:0009653,GO:0030154,GO:0040018,GO:0043433,GO:0045892,GO:0050885	RNA polymerase II proximal promoter sequence-specific DNA binding|DNA-binding transcription factor activity, RNA polymerase II-specific|proximal promoter DNA-binding transcription repressor activity, RNA polymerase II-specific|blood vessel development|DNA binding|DNA-binding transcription factor activity|nucleus|regulation of transcription by RNA polymerase II|anatomical structure morphogenesis|c…
FRMD1	64.213	88.7537	39.6723	0.446993	-1.16167	1.06987e-05	9.86623e-05	Down	1.01711	0.954412	0.931569	0.438065	0.382	0.439954	GeneID:101790727	FERM domain containing 1	GO:0003383,GO:0005737,GO:0005856,GO:0005886,GO:0031032,GO:0032970,GO:0034613,GO:0043296	apical constriction|cytoplasm|cytoskeleton|plasma membrane|actomyosin structure organization|regulation of actin filament-based process|cellular protein localization|apical junction complex
FZD7	602.288	812.772	391.804	0.482059	-1.05272	2.55603e-22	1.09719e-20	Down	16.2426	15.8728	17.9645	6.41479	6.73046	8.84982	GeneID:101800813	frizzled class receptor 7	GO:0004930,GO:0005886,GO:0007275,GO:0010008,GO:0016021,GO:0017147,GO:0035567,GO:0042813,GO:0060070	G protein-coupled receptor activity|plasma membrane|multicellular organism development|endosome membrane|integral component of membrane|Wnt-protein binding|non-canonical Wnt signaling pathway|Wnt-activated receptor activity|canonical Wnt signaling pathway	path:apla04150,path:apla04310,path:apla04916	mTOR signaling pathway|Wnt signaling pathway|Melanogenesis
G0S2	1591.19	975.692	2206.69	2.26167	1.17739	8.43743e-34	5.74024e-32	Up	61.8967	69.3228	56.6011	143.067	121.077	143.925	GeneID:101803046	G0/G1 switch 2	GO:0005739,GO:0007049,GO:0097191,GO:0120162,GO:2001238	mitochondrion|cell cycle|extrinsic apoptotic signaling pathway|positive regulation of cold-induced thermogenesis|positive regulation of extrinsic apoptotic signaling pathway
GAB2	182.328	117.728	246.928	2.09744	1.06863	2.94508e-11	5.88323e-10	Up	2.13235	1.84528	1.59105	4.81898	3.92462	4.4431	GeneID:101799688	GRB2 associated binding protein 2
GABRA1	152.863	92.2738	213.452	2.31325	1.20992	5.46375e-12	1.15042e-10	Up	1.01865	0.973187	1.18891	1.80871	2.50801	2.26145	GeneID:101805326	gamma-aminobutyric acid type A receptor alpha1 subunit	GO:0004890,GO:0005237,GO:0005254,GO:0005887,GO:0007165,GO:0007214,GO:0007268,GO:0022851,GO:0030054,GO:0032590,GO:0034220,GO:0034707,GO:0042391,GO:0043005,GO:0045202,GO:0045211,GO:0050877,GO:0051932,GO:0060078,GO:0098794,GO:0098982,GO:1902476,GO:1902711,GO:1904315	GABA-A receptor activity|inhibitory extracellular ligand-gated ion channel activity|chloride channel activity|integral component of plasma membrane|signal transduction|gamma-aminobutyric acid signaling pathway|chemical synaptic transmission|GABA-gated chloride ion channel activity|cell junction|dendrite membrane|ion transmembrane transport|chloride channel complex|regulation of membrane potential…	path:apla04080	Neuroactive ligand-receptor interaction
GADL1	25.6436	36.7301	14.5571	0.396326	-1.33524	0.0014888	0.00792945	Down	0.518607	0.424884	0.572695	0.195314	0.157224	0.185306	GeneID:101798008	glutamate decarboxylase like 1	GO:0000098,GO:0004068,GO:0004782,GO:0005829,GO:0008652,GO:0016831,GO:0030170	sulfur amino acid catabolic process|aspartate 1-decarboxylase activity|sulfinoalanine decarboxylase activity|cytosol|cellular amino acid biosynthetic process|carboxy-lyase activity|pyridoxal phosphate binding	path:apla00410,path:apla00430,path:apla00770	beta-Alanine metabolism|Taurine and hypotaurine metabolism|Pantothenate and CoA biosynthesis
GALNT16	466.795	627.612	305.977	0.487526	-1.03645	2.82316e-21	1.13107e-19	Down	7.72933	7.43857	8.42215	3.55617	3.36275	3.92349	GeneID:101797306	polypeptide N-acetylgalactosaminyltransferase 16			path:apla00512	Mucin type O-glycan biosynthesis
GCH1	1469.53	213.43	2725.63	12.7706	3.67475	0	0	Up	3.8756	4.59604	4.43224	50.3388	55.0373	52.4561	GeneID:101789988	GTP cyclohydrolase 1	GO:0003933,GO:0003934,GO:0005525,GO:0005634,GO:0005737,GO:0006729,GO:0008270,GO:0035998,GO:0045429,GO:0046654	GTP cyclohydrolase activity|GTP cyclohydrolase I activity|GTP binding|nucleus|cytoplasm|tetrahydrobiopterin biosynthetic process|zinc ion binding|7,8-dihydroneopterin 3'-triphosphate biosynthetic process|positive regulation of nitric oxide biosynthetic process|tetrahydrofolate biosynthetic process	path:apla00790	Folate biosynthesis
GCNT1	64.1205	9.10817	119.133	13.0798	3.70927	3.47996e-31	2.16343e-29	Up	0.200101	0.142794	0.144905	1.88018	2.03332	1.93855	GeneID:101796875	glucosaminyl (N-acetyl) transferase 1			path:apla00512	Mucin type O-glycan biosynthesis
GDNF	32.6219	14.668	50.5758	3.44804	1.78577	2.28652e-06	2.39064e-05	Up	0.325112	0.108108	0.107858	0.559187	0.617037	0.748575	GeneID:101802438	glial cell derived neurotrophic factor	GO:0000165,GO:0001656,GO:0001658,GO:0001755,GO:0001759,GO:0001941,GO:0003337,GO:0005088,GO:0005102,GO:0005576,GO:0005622,GO:0007165,GO:0007399,GO:0007411,GO:0008083,GO:0008284,GO:0008344,GO:0010468,GO:0021516,GO:0021784,GO:0030432,GO:0031175,GO:0032770,GO:0033603,GO:0042803,GO:0043066,GO:0043524,GO:0045597,GO:0045944,GO:0048255,GO:0048484,GO:0048485,GO:0048568,GO:0051584,GO:0060676,GO:0060688,GO:…	MAPK cascade|metanephros development|branching involved in ureteric bud morphogenesis|neural crest cell migration|organ induction|postsynaptic membrane organization|mesenchymal to epithelial transition involved in metanephros morphogenesis|Ras guanyl-nucleotide exchange factor activity|signaling receptor binding|extracellular region|intracellular|signal transduction|nervous system development|axo…
GDPGP1	22.3756	33.5113	11.24	0.335409	-1.57601	0.000579136	0.0034916	Down	6.74957	3.8952	6.66383	1.56311	2.64108	2.19654	GeneID:113844911	GDP-D-glucose phosphorylase 1	GO:0000166,GO:0005085,GO:0005737,GO:0006006,GO:0016779,GO:0016787,GO:0080048	nucleotide binding|guanyl-nucleotide exchange factor activity|cytoplasm|glucose metabolic process|nucleotidyltransferase activity|hydrolase activity|GDP-D-glucose phosphorylase activity
GJA5	91.8683	127.353	56.3834	0.442732	-1.17549	1.1389e-07	1.49602e-06	Down	0.797449	0.950331	0.757086	0.278655	0.311226	0.314985	GeneID:101796939	gap junction protein alpha 5	GO:0005922,GO:0007154,GO:0016021	connexin complex|cell communication|integral component of membrane
GLRX	10.9735	2.93416	19.0128	6.47982	2.69595	0.000139072	0.00098907	Up	0.315371	0.212964	0.106845	1.89801	1.47239	1.97217	GeneID:113840301	glutaredoxin	GO:0005737,GO:0009055,GO:0015035,GO:0045454	cytoplasm|electron transfer activity|protein disulfide oxidoreductase activity|cell redox homeostasis
GP1BA	21.3063	12.0427	30.5699	2.53847	1.34396	0.00346285	0.0161948	Up	0.0961136	0.0631341	0.0550328	0.23535	0.18747	0.150941	GeneID:101805382	glycoprotein Ib platelet subunit alpha	GO:0007155,GO:0007596,GO:0016021	cell adhesion|blood coagulation|integral component of membrane	path:apla04512	ECM-receptor interaction
GPAT2	5.40177	8.76693	2.03661	0.232306	-2.1059	0.0361443	0.110541	Down	0.0765391	0.0634388	0	0	0.0162747	0	GeneID:101800566	glycerol-3-phosphate acyltransferase 2, mitochondrial	GO:0004366,GO:0005739,GO:0005741,GO:0006072,GO:0006631,GO:0006654,GO:0008654,GO:0016021,GO:0016024,GO:0019432,GO:0031966,GO:0102420,GO:1990511	glycerol-3-phosphate O-acyltransferase activity|mitochondrion|mitochondrial outer membrane|glycerol-3-phosphate metabolic process|fatty acid metabolic process|phosphatidic acid biosynthetic process|phospholipid biosynthetic process|integral component of membrane|CDP-diacylglycerol biosynthetic process|triglyceride biosynthetic process|mitochondrial membrane|sn-1-glycerol-3-phosphate C16:0-DCA-CoA…	path:apla00561,path:apla00564	Glycerolipid metabolism|Glycerophospholipid metabolism
GPC3	73.415	97.9113	48.9187	0.499623	-1.00109	0.000771512	0.00448509	Down	0.944857	0.719765	0.720081	0.578772	0.381747	0.192741	GeneID:101795981	glypican 3
GPER1	297.557	139.167	455.947	3.27627	1.71205	3.49173e-37	2.62298e-35	Up	0.560207	0.529468	0.44584	1.43471	1.62295	1.67468	GeneID:101792901	G protein-coupled estrogen receptor 1	GO:0000139,GO:0001934,GO:0001956,GO:0002695,GO:0003682,GO:0004930,GO:0005496,GO:0005622,GO:0005634,GO:0005635,GO:0005737,GO:0005769,GO:0005783,GO:0005789,GO:0005794,GO:0005802,GO:0005886,GO:0006954,GO:0007049,GO:0007189,GO:0007204,GO:0008284,GO:0008285,GO:0010628,GO:0010629,GO:0014068,GO:0014069,GO:0016323,GO:0017082,GO:0019228,GO:0030054,GO:0030263,GO:0030264,GO:0030284,GO:0030335,GO:0030424,GO:…	Golgi membrane|positive regulation of protein phosphorylation|positive regulation of neurotransmitter secretion|negative regulation of leukocyte activation|chromatin binding|G protein-coupled receptor activity|steroid binding|intracellular|nucleus|nuclear envelope|cytoplasm|early endosome|endoplasmic reticulum|endoplasmic reticulum membrane|Golgi apparatus|trans-Golgi network|plasma membrane|infl…
GPR160	56.0721	20.7886	91.3555	4.39451	2.1357	5.84787e-13	1.36038e-11	Up	0.739214	1.07841	0.651128	3.42181	3.85125	3.45498	GeneID:101800050	G protein-coupled receptor 160	GO:0004930,GO:0005886,GO:0016021,GO:0043235	G protein-coupled receptor activity|plasma membrane|integral component of membrane|receptor complex
GPR61	9.85745	14.3092	5.40572	0.37778	-1.40438	0.0444677	0.130516	Down	0.777626	0.338243	1.16121	0.589537	0.0677979	0.383332	GeneID:101789802	G protein-coupled receptor 61	GO:0004930,GO:0005768,GO:0005886,GO:0007186,GO:0010008,GO:0016021,GO:0043235,GO:0043950,GO:1990763	G protein-coupled receptor activity|endosome|plasma membrane|G protein-coupled receptor signaling pathway|endosome membrane|integral component of membrane|receptor complex|positive regulation of cAMP-mediated signaling|arrestin family protein binding
GPR65	32.2586	4.23734	60.2799	14.2259	3.83044	3.04973e-17	9.50026e-16	Up	0.0453577	0.0253955	0.0127973	0.357079	0.294582	0.450289	GeneID:101796098	G protein-coupled receptor 65	GO:0004930,GO:0005622,GO:0005886,GO:0005887,GO:0006915,GO:0006955,GO:0007186,GO:0007189,GO:0007275,GO:0010447,GO:0031532,GO:0035025,GO:0051482,GO:0051496,GO:0090630	G protein-coupled receptor activity|intracellular|plasma membrane|integral component of plasma membrane|apoptotic process|immune response|G protein-coupled receptor signaling pathway|adenylate cyclase-activating G protein-coupled receptor signaling pathway|multicellular organism development|response to acidic pH|actin cytoskeleton reorganization|positive regulation of Rho protein signal transduct…
GREM1	3097.38	1941.55	4253.22	2.19063	1.13135	3.84846e-15	1.06538e-13	Up	18.5806	19.1849	18.1426	35.4441	41.2331	34.2457	GeneID:101789702	gremlin 1, DAN family BMP antagonist	GO:0000902,GO:0001658,GO:0002042,GO:0002092,GO:0003257,GO:0003337,GO:0005125,GO:0005615,GO:0007267,GO:0008284,GO:0009954,GO:0009986,GO:0010717,GO:0030199,GO:0030297,GO:0030326,GO:0030514,GO:0032331,GO:0033689,GO:0036122,GO:0042803,GO:0043066,GO:0043184,GO:0045668,GO:0045766,GO:0045892,GO:0046851,GO:0048263,GO:0051092,GO:0051893,GO:0051973,GO:0060173,GO:0060394,GO:0060676,GO:0090090,GO:0090190,GO:…	cell morphogenesis|branching involved in ureteric bud morphogenesis|cell migration involved in sprouting angiogenesis|positive regulation of receptor internalization|positive regulation of transcription from RNA polymerase II promoter involved in myocardial precursor cell differentiation|mesenchymal to epithelial transition involved in metanephros morphogenesis|cytokine activity|extracellular spa…
GSC	194.831	83.2284	306.434	3.68184	1.88043	5.54996e-31	3.42082e-29	Up	3.77487	3.22417	4.26967	14.9286	10.8409	12.0154	GeneID:101791361	goosecoid homeobox	GO:0005634,GO:0006355,GO:0014036,GO:0042474,GO:0043565	nucleus|regulation of transcription, DNA-templated|neural crest cell fate specification|middle ear morphogenesis|sequence-specific DNA binding
GSDMA	187.212	104.315	270.11	2.58937	1.3726	1.4105e-17	4.50082e-16	Up	1.20635	1.39161	1.44853	3.64848	2.87173	3.88808	GeneID:101803587	gasdermin A	GO:0001786,GO:0005546,GO:0005737,GO:0005829,GO:0005886,GO:0006915,GO:0048471,GO:0070269,GO:0070273	phosphatidylserine binding|phosphatidylinositol-4,5-bisphosphate binding|cytoplasm|cytosol|plasma membrane|apoptotic process|perinuclear region of cytoplasm|pyroptosis|phosphatidylinositol-4-phosphate binding
HACD4	234.279	140.669	327.89	2.33093	1.22091	4.19051e-17	1.29421e-15	Up	4.48112	4.64001	4.7495	10.8072	9.86	8.44975	GeneID:101799288	3-hydroxyacyl-CoA dehydratase 4	GO:0005783,GO:0005789,GO:0016021,GO:0018812,GO:0019899,GO:0030148,GO:0030497,GO:0042761,GO:0102158,GO:0102343,GO:0102344,GO:0102345	endoplasmic reticulum|endoplasmic reticulum membrane|integral component of membrane|3-hydroxyacyl-CoA dehydratase activity|enzyme binding|sphingolipid biosynthetic process|fatty acid elongation|very long-chain fatty acid biosynthetic process|very-long-chain 3-hydroxyacyl-CoA dehydratase activity|3-hydroxy-arachidoyl-CoA dehydratase activity|3-hydroxy-behenoyl-CoA dehydratase activity|3-hydroxy-li…	path:apla00062,path:apla01040	Fatty acid elongation|Biosynthesis of unsaturated fatty acids
HAS2	2957.37	1222.33	4692.41	3.8389	1.94069	1.03723e-103	2.13714e-101	Up	13.0846	14.3971	14.3248	48.9447	46.7	48.9934	GeneID:101798379	hyaluronan synthase 2	GO:0001570,GO:0005887,GO:0030213,GO:0035810,GO:0036302,GO:0045226,GO:0050501,GO:0070295,GO:0085029,GO:0090500	vasculogenesis|integral component of plasma membrane|hyaluronan biosynthetic process|positive regulation of urine volume|atrioventricular canal development|extracellular polysaccharide biosynthetic process|hyaluronan synthase activity|renal water absorption|extracellular matrix assembly|endocardial cushion to mesenchymal transition
HCRTR2	6.90043	2.27342	11.5274	5.07052	2.34213	0.00813635	0.0332815	Up	0.0151529	0.0303887	0	0.160126	0.0792119	0.155881	GeneID:101794034	hypocretin receptor 2	GO:0004930,GO:0005887,GO:0007186,GO:0007200,GO:0007218,GO:0007631,GO:0010840,GO:0016499,GO:0022410,GO:0051480	G protein-coupled receptor activity|integral component of plasma membrane|G protein-coupled receptor signaling pathway|phospholipase C-activating G protein-coupled receptor signaling pathway|neuropeptide signaling pathway|feeding behavior|regulation of circadian sleep/wake cycle, wakefulness|orexin receptor activity|circadian sleep/wake cycle process|regulation of cytosolic calcium ion concentrat…	path:apla04080	Neuroactive ligand-receptor interaction
HELZ2	3421.61	88.4698	6754.75	76.351	6.25457	0	0	Up	0.480504	0.42152	0.351916	34.9465	29.6844	33.3952	GeneID:101801034	helicase with zinc finger 2	GO:0000184,GO:0003677,GO:0003723,GO:0004004,GO:0005524,GO:0005654,GO:0005737,GO:0016020,GO:0019216,GO:0030374,GO:0045944,GO:0046872	nuclear-transcribed mRNA catabolic process, nonsense-mediated decay|DNA binding|RNA binding|ATP-dependent RNA helicase activity|ATP binding|nucleoplasm|cytoplasm|membrane|regulation of lipid metabolic process|nuclear receptor transcription coactivator activity|positive regulation of transcription by RNA polymerase II|metal ion binding
HES1	108.711	151.512	65.9091	0.435008	-1.20089	5.84249e-09	9.16934e-08	Down	20.7607	19.6855	18.7478	16.2214	5.61497	8.27087	GeneID:113844479	hes family bHLH transcription factor 1	GO:0000122,GO:0003677,GO:0005634,GO:0007219,GO:0007275,GO:0043425,GO:0045892,GO:0046982,GO:0048635	negative regulation of transcription by RNA polymerase II|DNA binding|nucleus|Notch signaling pathway|multicellular organism development|bHLH transcription factor binding|negative regulation of transcription, DNA-templated|protein heterodimerization activity|negative regulation of muscle organ development	path:apla03460,path:apla04330	Fanconi anemia pathway|Notch signaling pathway
HEYL	162.24	228.217	96.263	0.421804	-1.24535	3.69844e-13	8.73038e-12	Down	5.39695	4.80747	5.47969	2.4256	1.84074	2.72568	GeneID:101804919	hes related family bHLH transcription factor with YRPW motif-like	GO:0000977,GO:0001077,GO:0001078,GO:0001568,GO:0003714,GO:0005634,GO:0007219,GO:0007507,GO:0008134,GO:0030154,GO:0035939,GO:0043565,GO:0045944,GO:0046983,GO:0050767,GO:0060412,GO:1990837	RNA polymerase II regulatory region sequence-specific DNA binding|proximal promoter DNA-binding transcription activator activity, RNA polymerase II-specific|proximal promoter DNA-binding transcription repressor activity, RNA polymerase II-specific|blood vessel development|transcription corepressor activity|nucleus|Notch signaling pathway|heart development|transcription factor binding|cell differe…
HGF	1158.25	707.357	1609.14	2.27486	1.18578	7.6886e-46	6.80323e-44	Up	6.20845	5.91532	5.89154	13.1967	11.5462	12.8912	GeneID:101793664	hepatocyte growth factor	GO:0000187,GO:0000902,GO:0001889,GO:0001934,GO:0004252,GO:0008083,GO:0014068,GO:0030335,GO:0032715,GO:0032733,GO:0033137,GO:0035729,GO:0042056,GO:0042802,GO:0043066,GO:0043154,GO:0048012,GO:0050728,GO:0050731,GO:0051450,GO:0060326,GO:0060665,GO:0090201,GO:1900744,GO:1901299,GO:1902042,GO:1902947,GO:2000573	activation of MAPK activity|cell morphogenesis|liver development|positive regulation of protein phosphorylation|serine-type endopeptidase activity|growth factor activity|positive regulation of phosphatidylinositol 3-kinase signaling|positive regulation of cell migration|negative regulation of interleukin-6 production|positive regulation of interleukin-10 production|negative regulation of peptidyl…	path:apla04010,path:apla04510	MAPK signaling pathway|Focal adhesion
HHATL	7.19742	12.3701	2.02473	0.163679	-2.61106	0.00339127	0.0159323	Down	0.260454	0.202479	0.122898	0.0516325	0.0159066	0.0156257	GeneID:101791859	hedgehog acyltransferase like	GO:0005783,GO:0005789,GO:0016021,GO:0048471,GO:0060262	endoplasmic reticulum|endoplasmic reticulum membrane|integral component of membrane|perinuclear region of cytoplasm|negative regulation of N-terminal protein palmitoylation
HHIP	307.866	426.696	189.036	0.443024	-1.17454	2.09057e-17	6.59788e-16	Down	1.87218	2.053	1.76728	0.917834	0.661189	0.761393	GeneID:101794667	hedgehog interacting protein	GO:0003824,GO:0005576,GO:0005634,GO:0005737,GO:0005887,GO:0007224,GO:0007405,GO:0008270,GO:0009953,GO:0009968,GO:0009986,GO:0040036,GO:0043066,GO:0045879,GO:0048705,GO:0060170,GO:0060441,GO:0097108	catalytic activity|extracellular region|nucleus|cytoplasm|integral component of plasma membrane|smoothened signaling pathway|neuroblast proliferation|zinc ion binding|dorsal/ventral pattern formation|negative regulation of signal transduction|cell surface|regulation of fibroblast growth factor receptor signaling pathway|negative regulation of apoptotic process|negative regulation of smoothened si…	path:apla04340	Hedgehog signaling pathway
HIC1	2567.11	3653.82	1480.41	0.405168	-1.30341	5.84389e-28	3.20481e-26	Down	113.383	113.524	110.95	60.634	38.818	55.648	GeneID:101799878	HIC ZBTB transcriptional repressor 1	GO:0000122,GO:0003677,GO:0003700,GO:0005634,GO:0007275,GO:0008630,GO:0046872	negative regulation of transcription by RNA polymerase II|DNA binding|DNA-binding transcription factor activity|nucleus|multicellular organism development|intrinsic apoptotic signaling pathway in response to DNA damage|metal ion binding
HLX	17.8016	23.7482	11.855	0.499195	-1.00233	0.046668	0.135677	Down	1.19373	0.779514	0.747869	0.228163	0.312602	0.41587	GeneID:110353861	H2.0 like homeobox	GO:0001889,GO:0005634,GO:0006355,GO:0007519,GO:0008284,GO:0030154,GO:0043565,GO:0045627,GO:0045629,GO:0046622,GO:0048484,GO:0048557	liver development|nucleus|regulation of transcription, DNA-templated|skeletal muscle tissue development|positive regulation of cell proliferation|cell differentiation|sequence-specific DNA binding|positive regulation of T-helper 1 cell differentiation|negative regulation of T-helper 2 cell differentiation|positive regulation of organ growth|enteric nervous system development|embryonic digestive t…
HMX3	17.5842	5.22241	29.9461	5.73415	2.51958	0.0061446	0.0262247	Up	0.754342	0.157019	0.302161	1.03677	2.65665	3.15834	GeneID:101794880	H6 family homeobox 3	GO:0005634,GO:0006355,GO:0007399,GO:0030154,GO:0043565	nucleus|regulation of transcription, DNA-templated|nervous system development|cell differentiation|sequence-specific DNA binding
HOXB13	17.4681	23.7258	11.2103	0.472493	-1.08163	0.0328443	0.102736	Down	1.25863	0.894569	1.3983	0.170819	0.614727	0.939907	GeneID:101800514	homeobox B13	GO:0000122,GO:0001525,GO:0002009,GO:0005654,GO:0005667,GO:0008327,GO:0033574,GO:0040008,GO:0043565,GO:0060527,GO:0060743	negative regulation of transcription by RNA polymerase II|angiogenesis|morphogenesis of an epithelium|nucleoplasm|transcription factor complex|methyl-CpG binding|response to testosterone|regulation of growth|sequence-specific DNA binding|prostate epithelial cord arborization involved in prostate glandular acinus morphogenesis|epithelial cell maturation involved in prostate gland development
HPD	4.89843	9.12542	0.671445	0.0735796	-3.76455	0.0128313	0.0483958	Down	0.31215	0.210189	0.0416129	0.0232428	0	0.0209082	GeneID:101803264	4-hydroxyphenylpyruvate dioxygenase	GO:0000139,GO:0003868,GO:0005789,GO:0005829,GO:0006559,GO:0006572,GO:0046872,GO:0070062	Golgi membrane|4-hydroxyphenylpyruvate dioxygenase activity|endoplasmic reticulum membrane|cytosol|L-phenylalanine catabolic process|tyrosine catabolic process|metal ion binding|extracellular exosome	path:apla00130,path:apla00350,path:apla00360	Ubiquinone and other terpenoid-quinone biosynthesis|Tyrosine metabolism|Phenylalanine metabolism
HSD17B2	69.3824	93.2568	45.508	0.487986	-1.03509	4.09387e-05	0.000328215	Down	2.68327	3.01458	2.52161	1.60832	1.48031	0.978818	GeneID:101792379	hydroxysteroid 17-beta dehydrogenase 2			path:apla00140	Steroid hormone biosynthesis
HSD17B3	4.05429	1.30353	6.80504	5.22047	2.38418	0.0479015	0.138232	Up	0.0161697	0	0.0320156	0.0671155	0.0152332	0.0943811	GeneID:101797428	hydroxysteroid 17-beta dehydrogenase 3			path:apla00140	Steroid hormone biosynthesis
HTR2A	42.4711	24.9811	59.9612	2.40027	1.2632	0.000132072	0.000943008	Up	0.173402	0.390376	0.282319	0.573053	0.557911	0.882498	GeneID:101799400	5-hydroxytryptamine receptor 2A	GO:0004930,GO:0004993,GO:0005887,GO:0005901,GO:0007187,GO:0007200,GO:0007268,GO:0007610,GO:0030424,GO:0030425,GO:0030594,GO:0031410,GO:0042493,GO:0051209	G protein-coupled receptor activity|G protein-coupled serotonin receptor activity|integral component of plasma membrane|caveola|G protein-coupled receptor signaling pathway, coupled to cyclic nucleotide second messenger|phospholipase C-activating G protein-coupled receptor signaling pathway|chemical synaptic transmission|behavior|axon|dendrite|neurotransmitter receptor activity|cytoplasmic vesicl…	path:apla04020,path:apla04080,path:apla04540	Calcium signaling pathway|Neuroactive ligand-receptor interaction|Gap junction
HTR2B	187.139	102.314	271.965	2.65813	1.41041	2.5329e-18	8.65686e-17	Up	0.560548	0.634249	0.638792	1.54975	1.60349	1.5567	GeneID:101797990	5-hydroxytryptamine receptor 2B			path:apla04020,path:apla04080,path:apla04540	Calcium signaling pathway|Neuroactive ligand-receptor interaction|Gap junction
ICOSLG	293.91	194.958	392.862	2.01511	1.01086	1.13274e-14	3.01986e-13	Up	2.37736	2.55129	2.57676	4.83575	4.67403	4.78529	GeneID:101792229	inducible T cell costimulator ligand	GO:0002250,GO:0005102,GO:0005886,GO:0006952,GO:0006972,GO:0007165,GO:0009897,GO:0016021,GO:0031295,GO:0036464,GO:0042104,GO:0042110,GO:0042113,GO:0042802,GO:0050776,GO:0050852,GO:0070062	adaptive immune response|signaling receptor binding|plasma membrane|defense response|hyperosmotic response|signal transduction|external side of plasma membrane|integral component of membrane|T cell costimulation|cytoplasmic ribonucleoprotein granule|positive regulation of activated T cell proliferation|T cell activation|B cell activation|identical protein binding|regulation of immune response|T c…	path:apla04514,path:apla04672	Cell adhesion molecules (CAMs)|Intestinal immune network for IgA production
IFI30	141.086	188.293	93.8795	0.498582	-1.0041	2.9453e-08	4.20594e-07	Down	17.316	15.6208	15.8877	11.1596	7.42217	8.46038	GeneID:101803864	IFI30, lysosomal thiol reductase	GO:0005576,GO:0005764,GO:0019882,GO:0047134	extracellular region|lysosome|antigen processing and presentation|protein-disulfide reductase activity
IFIH1	2284.46	155.331	4413.59	28.4141	4.82854	7.72658e-115	1.74126e-112	Up	1.69583	1.62814	1.94422	42.3411	46.1507	40.2269	GeneID:101800076	interferon induced with helicase C domain 1	GO:0003677,GO:0003725,GO:0003727,GO:0004386,GO:0005524,GO:0005634,GO:0005829,GO:0008270,GO:0009597,GO:0009615,GO:0016032,GO:0016579,GO:0016925,GO:0032480,GO:0032727,GO:0032728,GO:0034344,GO:0035549,GO:0039528,GO:0039530,GO:0042802,GO:0043021,GO:0045087,GO:0051607,GO:0060760,GO:0071360,GO:1902741,GO:1904469,GO:2000778	DNA binding|double-stranded RNA binding|single-stranded RNA binding|helicase activity|ATP binding|nucleus|cytosol|zinc ion binding|detection of virus|response to virus|viral process|protein deubiquitination|protein sumoylation|negative regulation of type I interferon production|positive regulation of interferon-alpha production|positive regulation of interferon-beta production|regulation of type …	path:apla04622,path:apla05164,path:apla05168	RIG-I-like receptor signaling pathway|Influenza A|Herpes simplex infection
IFITM1	65.8811	1.2987	130.463	100.457	6.65043	2.20088e-51	2.20926e-49	Up	0.117923	0.124901	0.241669	15.5	16.0545	15.1692	GeneID:101791431	interferon-induced transmembrane protein 1	GO:0005765,GO:0005886,GO:0006955,GO:0009615,GO:0016021,GO:0031902,GO:0032897,GO:0032991,GO:0034341,GO:0035455,GO:0035456,GO:0045071,GO:0046597,GO:0051607,GO:0060337	lysosomal membrane|plasma membrane|immune response|response to virus|integral component of membrane|late endosome membrane|negative regulation of viral transcription|protein-containing complex|response to interferon-gamma|response to interferon-alpha|response to interferon-beta|negative regulation of viral genome replication|negative regulation of viral entry into host cell|defense response to vi…
IFITM2	1972.92	715.852	3229.99	4.5121	2.1738	8.60883e-22	3.58859e-20	Up	169.245	142.789	167.169	703.908	533.743	764.055	GeneID:106014264	interferon-induced transmembrane protein 2	GO:0001701,GO:0005886,GO:0005887,GO:0030282,GO:0030500,GO:0060349	in utero embryonic development|plasma membrane|integral component of plasma membrane|bone mineralization|regulation of bone mineralization|bone morphogenesis
IFITM5	4.92357	0.328125	9.51902	29.0103	4.85849	0.000461612	0.00286358	Up	0.306026	0	0	0.341357	0	0.308457	GeneID:101795624	interferon induced transmembrane protein 5	GO:0001701,GO:0005886,GO:0005887,GO:0030282,GO:0030500,GO:0060349	in utero embryonic development|plasma membrane|integral component of plasma membrane|bone mineralization|regulation of bone mineralization|bone morphogenesis
IFNAR2	2481.53	1409.04	3554.02	2.52231	1.33474	1.15038e-25	5.80139e-24	Up	23.1169	24.3127	25.1169	64.3267	54.1293	57.4309	GeneID:101804315	interferon alpha and beta receptor subunit 2			path:apla04060,path:apla04217,path:apla04620,path:apla04621,path:apla05164,path:apla05168	Cytokine-cytokine receptor interaction|Necroptosis|Toll-like receptor signaling pathway|NOD-like receptor signaling pathway|Influenza A|Herpes simplex infection
IGF1	108.088	159.562	56.6143	0.354812	-1.49488	8.21773e-13	1.88134e-11	Down	1.02398	1.07729	0.98963	0.38661	0.326519	0.29253	GeneID:101793597	insulin like growth factor 1	GO:0000187,GO:0001775,GO:0005158,GO:0005159,GO:0005178,GO:0005179,GO:0005615,GO:0005622,GO:0005623,GO:0007405,GO:0008083,GO:0008283,GO:0009408,GO:0010467,GO:0010560,GO:0010629,GO:0014065,GO:0014068,GO:0014834,GO:0014896,GO:0014904,GO:0014911,GO:0021650,GO:0030166,GO:0032148,GO:0033160,GO:0035630,GO:0035867,GO:0040014,GO:0042104,GO:0042531,GO:0042567,GO:0043066,GO:0043491,GO:0043524,GO:0043568,GO:…	activation of MAPK activity|cell activation|insulin receptor binding|insulin-like growth factor receptor binding|integrin binding|hormone activity|extracellular space|intracellular|cell|neuroblast proliferation|growth factor activity|cell proliferation|response to heat|gene expression|positive regulation of glycoprotein biosynthetic process|negative regulation of gene expression|phosphatidylinosi…	path:apla04010,path:apla04068,path:apla04114,path:apla04115,path:apla04150,path:apla04510,path:apla04914	MAPK signaling pathway|FoxO signaling pathway|Oocyte meiosis|p53 signaling pathway|mTOR signaling pathway|Focal adhesion|Progesterone-mediated oocyte maturation
IGSF10	144.407	214.533	74.2798	0.346239	-1.53016	6.17267e-17	1.88221e-15	Down	0.75809	0.725068	0.737676	0.335253	0.242727	0.173006	GeneID:101803383	immunoglobulin superfamily member 10	GO:0001503,GO:0005576,GO:2001222	ossification|extracellular region|regulation of neuron migration
IKBKE	450.618	254.083	647.154	2.54702	1.34881	1.98088e-33	1.33506e-31	Up	2.54046	3.14269	2.59922	8.54636	6.9472	7.24045	GeneID:101800153	inhibitor of nuclear factor kappa B kinase subunit epsilon			path:apla04620,path:apla04621,path:apla04622,path:apla04623,path:apla04625,path:apla05164,path:apla05168	Toll-like receptor signaling pathway|NOD-like receptor signaling pathway|RIG-I-like receptor signaling pathway|Cytosolic DNA-sensing pathway|C-type lectin receptor signaling pathway|Influenza A|Herpes simplex infection
IL10	42.9033	16.544	69.2626	4.18658	2.06577	8.4743e-10	1.46027e-08	Up	0.414931	0.744686	0.332317	2.18337	2.41892	2.28771	GeneID:101801826	interleukin 10	GO:0001938,GO:0002740,GO:0002826,GO:0002875,GO:0002904,GO:0005125,GO:0005576,GO:0005615,GO:0006954,GO:0006955,GO:0030886,GO:0030889,GO:0032695,GO:0032715,GO:0032720,GO:0032800,GO:0034115,GO:0035729,GO:0042742,GO:0042832,GO:0044130,GO:0045019,GO:0045077,GO:0045348,GO:0045787,GO:0050715,GO:0051045,GO:0051091,GO:0051384,GO:0060302,GO:0071222,GO:1902895,GO:1903034,GO:1903208,GO:1903672,GO:1904706,GO:…	positive regulation of endothelial cell proliferation|negative regulation of cytokine secretion involved in immune response|negative regulation of T-helper 1 type immune response|negative regulation of chronic inflammatory response to antigenic stimulus|positive regulation of B cell apoptotic process|cytokine activity|extracellular region|extracellular space|inflammatory response|immune response|…	path:apla04060,path:apla04068,path:apla04625,path:apla04672	Cytokine-cytokine receptor interaction|FoxO signaling pathway|C-type lectin receptor signaling pathway|Intestinal immune network for IgA production
IL12B	25.6913	0.974719	50.408	51.7154	5.69252	4.19178e-14	1.08154e-12	Up	0.0175772	0.0348821	0	0.345074	0.315814	0.230829	GeneID:101800211	interleukin 12B	GO:0002827,GO:0004896,GO:0005125,GO:0005143,GO:0008083,GO:0009897,GO:0010536,GO:0019955,GO:0032729,GO:0032816,GO:0042104,GO:0042164,GO:0042531,GO:0043235,GO:0043514,GO:0045519,GO:0050671,GO:0051135,GO:0070743	positive regulation of T-helper 1 type immune response|cytokine receptor activity|cytokine activity|interleukin-12 receptor binding|growth factor activity|external side of plasma membrane|positive regulation of activation of Janus kinase activity|cytokine binding|positive regulation of interferon-gamma production|positive regulation of natural killer cell activation|positive regulation of activat…	path:apla04060,path:apla04620,path:apla04622,path:apla04625,path:apla05164,path:apla05168	Cytokine-cytokine receptor interaction|Toll-like receptor signaling pathway|RIG-I-like receptor signaling pathway|C-type lectin receptor signaling pathway|Influenza A|Herpes simplex infection
IL12RB1	7.31121	0	14.6224	Inf	Inf	4.69108e-07	5.58246e-06	Up	0	0	0	0.318382	0.249736	0.132593	GeneID:101797086	interleukin 12 receptor subunit beta 1			path:apla04060	Cytokine-cytokine receptor interaction
IL13RA1	778.38	501.801	1054.96	2.10235	1.072	1.21317e-31	7.64085e-30	Up	6.48549	6.35301	7.13352	11.3655	12.6407	13.6176	GeneID:101790036	interleukin 13 receptor subunit alpha 1	GO:0004896,GO:0009897,GO:0016021,GO:0016515,GO:0019955,GO:0043235	cytokine receptor activity|external side of plasma membrane|integral component of membrane|interleukin-13 receptor activity|cytokine binding|receptor complex	path:apla04060	Cytokine-cytokine receptor interaction
IL15RA	92.0521	23.4063	160.698	6.86557	2.77938	1.7968e-18	6.19982e-17	Up	0.47997	0.450269	0.431539	3.50825	3.20427	4.59051	GeneID:113844118	interleukin 15 receptor subunit alpha
IL17RA	1713.07	945.028	2481.11	2.62543	1.39256	2.94454e-77	4.28981e-75	Up	9.20466	8.71918	8.72621	23.5479	22.0058	22.3627	GeneID:101793100	interleukin 17 receptor A	GO:0005102,GO:0005886,GO:0016021,GO:0030368,GO:0032747,GO:0050729,GO:0050832,GO:0071345,GO:0071621,GO:0072537,GO:1900017,GO:2000664,GO:2000667	signaling receptor binding|plasma membrane|integral component of membrane|interleukin-17 receptor activity|positive regulation of interleukin-23 production|positive regulation of inflammatory response|defense response to fungus|cellular response to cytokine stimulus|granulocyte chemotaxis|fibroblast activation|positive regulation of cytokine production involved in inflammatory response|positive r…	path:apla04060	Cytokine-cytokine receptor interaction
IL17REL	370.588	105.331	635.846	6.03663	2.59374	4.38942e-88	7.44806e-86	Up	2.13324	1.99625	2.20062	11.0408	11.4196	12.1007	GeneID:101790673	interleukin 17 receptor E like	GO:0030368	interleukin-17 receptor activity
IL18R1	30.5631	14.9482	46.178	3.0892	1.62723	2.73044e-05	0.000228297	Up	0.145898	0.186089	0.111321	0.302928	0.380923	0.342846	GeneID:101795383	interleukin 18 receptor 1	GO:0004908,GO:0005886,GO:0006954,GO:0006955,GO:0007165,GO:0016021,GO:0030101,GO:0032729,GO:0035655,GO:0038023,GO:0042007,GO:0042008,GO:0045063,GO:0051092,GO:0071345,GO:0120163,GO:1901224,GO:2000556	interleukin-1 receptor activity|plasma membrane|inflammatory response|immune response|signal transduction|integral component of membrane|natural killer cell activation|positive regulation of interferon-gamma production|interleukin-18-mediated signaling pathway|signaling receptor activity|interleukin-18 binding|interleukin-18 receptor activity|T-helper 1 cell differentiation|positive regulation of…	path:apla04060	Cytokine-cytokine receptor interaction
IL23R	130.278	57.8326	202.724	3.50535	1.80956	1.10914e-20	4.34706e-19	Up	0.568918	0.600728	0.721302	2.66024	1.84512	2.15428	GeneID:101791678	interleukin 23 receptor	GO:0001916,GO:0002230,GO:0002827,GO:0004896,GO:0005886,GO:0006954,GO:0009897,GO:0010536,GO:0019221,GO:0019955,GO:0032496,GO:0032693,GO:0032725,GO:0032729,GO:0032735,GO:0032740,GO:0032819,GO:0034341,GO:0038155,GO:0042102,GO:0042104,GO:0042509,GO:0042531,GO:0043235,GO:0043382,GO:0045672,GO:0050829,GO:0051135,GO:0072536,GO:2000318,GO:2000330	positive regulation of T cell mediated cytotoxicity|positive regulation of defense response to virus by host|positive regulation of T-helper 1 type immune response|cytokine receptor activity|plasma membrane|inflammatory response|external side of plasma membrane|positive regulation of activation of Janus kinase activity|cytokine-mediated signaling pathway|cytokine binding|response to lipopolysacch…	path:apla04060	Cytokine-cytokine receptor interaction
IL31RA	313.579	169.027	458.132	2.71041	1.43851	1.3234e-28	7.5147e-27	Up	1.10578	1.15001	1.03441	2.63236	2.71689	2.81327	GeneID:101801072	interleukin 31 receptor A	GO:0000165,GO:0002067,GO:0002438,GO:0003713,GO:0004896,GO:0005622,GO:0005886,GO:0006952,GO:0007169,GO:0007259,GO:0008284,GO:0009897,GO:0016021,GO:0019221,GO:0019901,GO:0019955,GO:0030054,GO:0030224,GO:0030225,GO:0030424,GO:0035745,GO:0042531,GO:0042592,GO:0042734,GO:0043031,GO:0043066,GO:0043235,GO:0045893,GO:0098542	MAPK cascade|glandular epithelial cell differentiation|acute inflammatory response to antigenic stimulus|transcription coactivator activity|cytokine receptor activity|intracellular|plasma membrane|defense response|transmembrane receptor protein tyrosine kinase signaling pathway|JAK-STAT cascade|positive regulation of cell proliferation|external side of plasma membrane|integral component of membra…	path:apla04060	Cytokine-cytokine receptor interaction
IL6	249.446	47.4089	451.483	9.52318	3.25144	4.55809e-76	6.38266e-74	Up	0.149714	0.247199	0.156679	1.6394	1.48886	1.77742	GeneID:101798321	interleukin 6	GO:0001781,GO:0002384,GO:0002675,GO:0005125,GO:0005138,GO:0005615,GO:0005896,GO:0006953,GO:0008083,GO:0010574,GO:0031175,GO:0032722,GO:0032755,GO:0032966,GO:0033138,GO:0042102,GO:0042531,GO:0043065,GO:0043066,GO:0043410,GO:0045727,GO:0045944,GO:0048661,GO:0050871,GO:0051024,GO:0051091,GO:0051384,GO:0051607,GO:0060252,GO:0070102,GO:0070301,GO:0070417,GO:0071222	neutrophil apoptotic process|hepatic immune response|positive regulation of acute inflammatory response|cytokine activity|interleukin-6 receptor binding|extracellular space|interleukin-6 receptor complex|acute-phase response|growth factor activity|regulation of vascular endothelial growth factor production|neuron projection development|positive regulation of chemokine production|positive regulati…	path:apla04060,path:apla04068,path:apla04218,path:apla04620,path:apla04621,path:apla04623,path:apla04625,path:apla04672,path:apla04933,path:apla05132,path:apla05164,path:apla05168	Cytokine-cytokine receptor interaction|FoxO signaling pathway|Cellular senescence|Toll-like receptor signaling pathway|NOD-like receptor signaling pathway|Cytosolic DNA-sensing pathway|C-type lectin receptor signaling pathway|Intestinal immune network for IgA production|AGE-RAGE signaling pathway in diabetic complications|Salmonella infection|Influenza A|Herpes simplex infection
IL7R	175.9	108.278	243.521	2.24903	1.16931	9.87633e-13	2.25034e-11	Up	1.13913	1.10443	1.03579	2.79245	2.10836	2.31561	GeneID:101800042	interleukin 7 receptor	GO:0004896,GO:0005886,GO:0016021	cytokine receptor activity|plasma membrane|integral component of membrane	path:apla04060,path:apla04068	Cytokine-cytokine receptor interaction|FoxO signaling pathway
IL8	3570.64	2094.31	5046.98	2.40986	1.26895	1.77935e-42	1.5008e-40	Up	94.4262	95.7458	97.791	215.306	234.191	227.001	GeneID:101804010	interleukin 8	GO:0001525,GO:0002232,GO:0002269,GO:0002548,GO:0005125,GO:0005153,GO:0005615,GO:0006954,GO:0006955,GO:0008009,GO:0008083,GO:0010628,GO:0030097,GO:0030593,GO:0030595,GO:0036446,GO:0042060,GO:0042119,GO:0048147,GO:0048246,GO:0048247,GO:0050729,GO:0061844,GO:0070098,GO:0071222	angiogenesis|leukocyte chemotaxis involved in inflammatory response|leukocyte activation involved in inflammatory response|monocyte chemotaxis|cytokine activity|interleukin-8 receptor binding|extracellular space|inflammatory response|immune response|chemokine activity|growth factor activity|positive regulation of gene expression|hemopoiesis|neutrophil chemotaxis|leukocyte chemotaxis|myofibroblast…	path:apla04060,path:apla04218,path:apla04620,path:apla04621,path:apla04622,path:apla04933,path:apla05132,path:apla05164	Cytokine-cytokine receptor interaction|Cellular senescence|Toll-like receptor signaling pathway|NOD-like receptor signaling pathway|RIG-I-like receptor signaling pathway|AGE-RAGE signaling pathway in diabetic complications|Salmonella infection|Influenza A
INHBB	33.8233	22.3874	45.2592	2.02163	1.01552	0.00501565	0.0220955	Up	0.452931	1.31625	0.754529	1.52292	1.44254	1.53578	GeneID:101800492	inhibin subunit beta B	GO:0005125,GO:0005160,GO:0005179,GO:0005615,GO:0008083,GO:0009267,GO:0009611,GO:0010862,GO:0032869,GO:0032924,GO:0042803,GO:0042981,GO:0043408,GO:0045444,GO:0046676,GO:0046881,GO:0046882,GO:0048178,GO:0048468,GO:0048471,GO:0060279,GO:0060395,GO:1900164	cytokine activity|transforming growth factor beta receptor binding|hormone activity|extracellular space|growth factor activity|cellular response to starvation|response to wounding|positive regulation of pathway-restricted SMAD protein phosphorylation|cellular response to insulin stimulus|activin receptor signaling pathway|protein homodimerization activity|regulation of apoptotic process|regulatio…	path:apla04060,path:apla04350	Cytokine-cytokine receptor interaction|TGF-beta signaling pathway
INSM1	9.49041	14.5994	4.38146	0.300113	-1.73642	0.0176712	0.062622	Down	0.691155	1.1383	1.70932	0.940982	0.165946	0.160621	GeneID:113843047	INSM transcriptional repressor 1	GO:0000122,GO:0000978,GO:0003309,GO:0003310,GO:0003700,GO:0005634,GO:0007399,GO:0017053,GO:0031490,GO:0046872,GO:0060290	negative regulation of transcription by RNA polymerase II|RNA polymerase II proximal promoter sequence-specific DNA binding|type B pancreatic cell differentiation|pancreatic A cell differentiation|DNA-binding transcription factor activity|nucleus|nervous system development|transcriptional repressor complex|chromatin DNA binding|metal ion binding|transdifferentiation
IP6K2	2586.33	1549.89	3622.77	2.33744	1.22493	3.05018e-71	3.89317e-69	Up	38.5562	37	36.9876	76.4402	84.3125	79.1688	GeneID:101797078	inositol hexakisphosphate kinase 2	GO:0000827,GO:0000828,GO:0000829,GO:0000832,GO:0001650,GO:0005524,GO:0005634,GO:0005654,GO:0006817,GO:0030054,GO:0030308,GO:0032958,GO:0043065,GO:0043647,GO:0046854,GO:0052723,GO:0052724,GO:0052836,GO:0052839,GO:0060337	inositol-1,3,4,5,6-pentakisphosphate kinase activity|inositol hexakisphosphate kinase activity|inositol heptakisphosphate kinase activity|inositol hexakisphosphate 5-kinase activity|fibrillar center|ATP binding|nucleus|nucleoplasm|phosphate ion transport|cell junction|negative regulation of cell growth|inositol phosphate biosynthetic process|positive regulation of apoptotic process|inositol phosp…	path:apla04070	Phosphatidylinositol signaling system
IRF1	3153.99	309.001	5998.98	19.4141	4.27903	0	0	Up	4.54096	4.84959	5.50297	89.7692	81.8405	84.5334	GeneID:101799633	interferon regulatory factor 1	GO:0000790,GO:0000978,GO:0001077,GO:0005737,GO:0006915,GO:0007050,GO:0008285,GO:0032728,GO:0034124,GO:0035458,GO:0043374,GO:0045084,GO:0045590,GO:0045892,GO:0051607,GO:0060333,GO:0071260,GO:2000564	nuclear chromatin|RNA polymerase II proximal promoter sequence-specific DNA binding|proximal promoter DNA-binding transcription activator activity, RNA polymerase II-specific|cytoplasm|apoptotic process|cell cycle arrest|negative regulation of cell proliferation|positive regulation of interferon-beta production|regulation of MyD88-dependent toll-like receptor signaling pathway|cellular response t…	path:apla04625	C-type lectin receptor signaling pathway
IRF2	606.566	402.191	810.942	2.01631	1.01172	1.59103e-20	6.11932e-19	Up	5.07001	4.97661	4.26983	7.85534	9.07113	9.57748	GeneID:101789879	interferon regulatory factor 2	GO:0000977,GO:0001228,GO:0005654,GO:0005829,GO:0005925,GO:0008283,GO:0051607	RNA polymerase II regulatory region sequence-specific DNA binding|DNA-binding transcription activator activity, RNA polymerase II-specific|nucleoplasm|cytosol|focal adhesion|cell proliferation|defense response to virus
IRF4	8.60203	2.26893	14.9351	6.58244	2.71862	0.000782393	0.0045392	Up	0.0189986	0.0575434	0.0189279	0.317056	0.23705	0.21439	GeneID:101800773	interferon regulatory factor 4	GO:0000788,GO:0000978,GO:0001077,GO:0003700,GO:0005654,GO:0006479,GO:0016279,GO:0034122,GO:0042832,GO:0043011,GO:0043388,GO:0043565,GO:0043966,GO:0043967,GO:0045082,GO:0045086,GO:0045368,GO:0045404,GO:0045893,GO:0045944,GO:0072540,GO:0120162	nuclear nucleosome|RNA polymerase II proximal promoter sequence-specific DNA binding|proximal promoter DNA-binding transcription activator activity, RNA polymerase II-specific|DNA-binding transcription factor activity|nucleoplasm|protein methylation|protein-lysine N-methyltransferase activity|negative regulation of toll-like receptor signaling pathway|defense response to protozoan|myeloid dendrit…
IRF6	138.982	58.8481	219.116	3.72342	1.89663	1.32475e-23	6.00846e-22	Up	1.10808	1.11064	0.811029	3.94892	3.06029	3.43018	GeneID:101789859	interferon regulatory factor 6	GO:0003677,GO:0003700,GO:0005634,GO:0005737,GO:0008285,GO:0044212,GO:0045893,GO:0060644	DNA binding|DNA-binding transcription factor activity|nucleus|cytoplasm|negative regulation of cell proliferation|transcription regulatory region DNA binding|positive regulation of transcription, DNA-templated|mammary gland epithelial cell differentiation
IRF7	12.6944	1.62683	23.7619	14.6063	3.86852	6.894e-05	0.00052554	Up	0.513687	0	0	1.76863	4.69548	0.525156	GeneID:113843752	interferon regulatory factor 7	GO:0002224,GO:0003700,GO:0005634,GO:0005737,GO:0044212,GO:0051607	toll-like receptor signaling pathway|DNA-binding transcription factor activity|nucleus|cytoplasm|transcription regulatory region DNA binding|defense response to virus	path:apla04620,path:apla04621,path:apla04622,path:apla04623,path:apla05164,path:apla05168	Toll-like receptor signaling pathway|NOD-like receptor signaling pathway|RIG-I-like receptor signaling pathway|Cytosolic DNA-sensing pathway|Influenza A|Herpes simplex infection
IRF8	554.166	217.225	891.107	4.10223	2.03641	7.43372e-80	1.11684e-77	Up	5.57671	4.54203	4.36035	21.722	21.0467	18.7872	GeneID:101798500	interferon regulatory factor 8	GO:0000122,GO:0000978,GO:0001078,GO:0005634,GO:0005654,GO:0005737,GO:0006909,GO:0030099,GO:0032729,GO:0032735,GO:0042742,GO:0042832,GO:0044130,GO:0045944,GO:0071222,GO:0071346	negative regulation of transcription by RNA polymerase II|RNA polymerase II proximal promoter sequence-specific DNA binding|proximal promoter DNA-binding transcription repressor activity, RNA polymerase II-specific|nucleus|nucleoplasm|cytoplasm|phagocytosis|myeloid cell differentiation|positive regulation of interferon-gamma production|positive regulation of interleukin-12 production|defense resp…
ISL2	53.334	18.198	88.47	4.86151	2.2814	1.36486e-08	2.03361e-07	Up	1.54293	0.696185	1.43424	7.41117	7.2539	7.6394	GeneID:113844784	ISL LIM homeobox 2	GO:0005623,GO:0005634,GO:0006355,GO:0007275,GO:0032526,GO:0043565,GO:0046872	cell|nucleus|regulation of transcription, DNA-templated|multicellular organism development|response to retinoic acid|sequence-specific DNA binding|metal ion binding
ITGBL1	19.7237	27.9884	11.4591	0.409423	-1.28833	0.0327252	0.102518	Down	0.571459	0.444717	0.299776	0.32605	0.0820548	0.115763	GeneID:101800423	integrin subunit beta like 1	GO:0005178,GO:0005576,GO:0005886,GO:0005925,GO:0007155,GO:0007160,GO:0007229,GO:0008305,GO:0009986,GO:0016477,GO:0033627	integrin binding|extracellular region|plasma membrane|focal adhesion|cell adhesion|cell-matrix adhesion|integrin-mediated signaling pathway|integrin complex|cell surface|cell migration|cell adhesion mediated by integrin
KAZN	434.455	216.168	652.742	3.01961	1.59436	3.35907e-22	1.43337e-20	Up	4.37308	5.09998	4.08486	15.874	11.647	14.7798	GeneID:101791582	kazrin, periplakin interacting protein	GO:0001533,GO:0005654,GO:0005829,GO:0005856,GO:0016607,GO:0030057,GO:0070268	cornified envelope|nucleoplasm|cytosol|cytoskeleton|nuclear speck|desmosome|cornification
KCNG1	17.1064	25.727	8.48589	0.329844	-1.60015	0.00224646	0.0112973	Down	0.230364	0.106902	0.15422	0.0360331	0.0531671	0.0737252	GeneID:101791145	potassium voltage-gated channel modifier subfamily G member 1	GO:0005249,GO:0005251,GO:0005267,GO:0005886,GO:0006813,GO:0008076,GO:0016021,GO:0051260,GO:0071805,GO:1902259	voltage-gated potassium channel activity|delayed rectifier potassium channel activity|potassium channel activity|plasma membrane|potassium ion transport|voltage-gated potassium channel complex|integral component of membrane|protein homooligomerization|potassium ion transmembrane transport|regulation of delayed rectifier potassium channel activity
KCNG3	101.698	144.415	58.9815	0.408418	-1.29188	1.33514e-09	2.25226e-08	Down	2.03344	1.50573	1.74811	0.626657	0.634532	0.835217	GeneID:101800555	potassium voltage-gated channel modifier subfamily G member 3	GO:0005249,GO:0005251,GO:0005737,GO:0005886,GO:0006813,GO:0008076,GO:0016021,GO:0034765,GO:0051260,GO:0071805	voltage-gated potassium channel activity|delayed rectifier potassium channel activity|cytoplasm|plasma membrane|potassium ion transport|voltage-gated potassium channel complex|integral component of membrane|regulation of ion transmembrane transport|protein homooligomerization|potassium ion transmembrane transport
KCNRG	380.499	221.985	539.014	2.42816	1.27986	5.68456e-27	3.03661e-25	Up	3.72796	3.8888	3.48738	9.70742	7.19495	9.07409	GeneID:101802989	potassium channel regulator	GO:0005783,GO:0051260,GO:1902260	endoplasmic reticulum|protein homooligomerization|negative regulation of delayed rectifier potassium channel activity
KDM4A	1795.62	1171.93	2419.31	2.06437	1.0457	2.70027e-46	2.46493e-44	Up	13.9157	13.6296	14.4049	29.1054	25.4542	27.6878	GeneID:101803199	lysine demethylase 4A	GO:0001078,GO:0001227,GO:0001650,GO:0003682,GO:0005634,GO:0005654,GO:0005721,GO:0005829,GO:0008270,GO:0010507,GO:0010628,GO:0010629,GO:0014898,GO:0016032,GO:0016577,GO:0031625,GO:0031667,GO:0032452,GO:0032454,GO:0033169,GO:0035064,GO:0035097,GO:0045666,GO:0045892,GO:0048712,GO:0051864,GO:0060548,GO:0070544,GO:1900113	proximal promoter DNA-binding transcription repressor activity, RNA polymerase II-specific|DNA-binding transcription repressor activity, RNA polymerase II-specific|fibrillar center|chromatin binding|nucleus|nucleoplasm|pericentric heterochromatin|cytosol|zinc ion binding|negative regulation of autophagy|positive regulation of gene expression|negative regulation of gene expression|cardiac muscle h…
KHDRBS2	56.6973	77.1389	36.2557	0.470006	-1.08925	0.00293036	0.0140695	Down	0.306122	0.202142	0.154938	0.0839323	0.107719	0.139113	GeneID:101799423	KH RNA binding domain containing, signal transduction associated 2	GO:0005654,GO:0006397,GO:0008143,GO:0008266,GO:0017124,GO:0042169,GO:0042802,GO:0046982,GO:0048024	nucleoplasm|mRNA processing|poly(A) binding|poly(U) RNA binding|SH3 domain binding|SH2 domain binding|identical protein binding|protein heterodimerization activity|regulation of mRNA splicing, via spliceosome
KIAA0895L	31.7459	45.2158	18.2761	0.404196	-1.30687	0.00121865	0.00667043	Down	1.80455	1.3752	1.13508	0.531725	0.257367	0.982989	GeneID:101804990	KIAA0895 like
KIF17	139.961	68.9171	211.005	3.06173	1.61435	3.54389e-18	1.18869e-16	Up	0.477729	0.465774	0.583853	1.6105	1.26555	1.23958	GeneID:101795616	kinesin family member 17	GO:0003777,GO:0005524,GO:0005829,GO:0005871,GO:0005874,GO:0005929,GO:0005930,GO:0007018,GO:0008017,GO:0008574,GO:0015031,GO:0016192,GO:0016887,GO:0030992,GO:0032391,GO:0032839,GO:0035735,GO:0036064,GO:0043005,GO:0098971,GO:1990075	microtubule motor activity|ATP binding|cytosol|kinesin complex|microtubule|cilium|axoneme|microtubule-based movement|microtubule binding|ATP-dependent microtubule motor activity, plus-end-directed|protein transport|vesicle-mediated transport|ATPase activity|intraciliary transport particle B|photoreceptor connecting cilium|dendrite cytoplasm|intraciliary transport involved in cilium assembly|cilia…
KLHDC8B	10.0069	14.9268	5.08709	0.340802	-1.55299	0.0249715	0.0828724	Down	0.580207	0.859157	0.82081	0.0836113	0.2428	0.411877	GeneID:106016370	kelch domain containing 8B	GO:0005829,GO:0007049,GO:0030496,GO:0051301	cytosol|cell cycle|midbody|cell division
KLHL35	294.678	160.53	428.826	2.67132	1.41755	5.14608e-25	2.516e-23	Up	1.56323	1.94348	1.42853	4.8714	4.14655	3.81312	GeneID:101799500	kelch like family member 35
LAMA1	273.135	366.36	179.91	0.491074	-1.02599	3.29722e-14	8.58407e-13	Down	3.58773	3.40328	3.22462	1.2418	1.62671	1.78142	GeneID:113842837	laminin subunit alpha 1	GO:0002011,GO:0005102,GO:0005201,GO:0005576,GO:0005604,GO:0005606,GO:0005608,GO:0005615,GO:0005911,GO:0006468,GO:0007155,GO:0007166,GO:0008022,GO:0009888,GO:0016020,GO:0030155,GO:0030334,GO:0031012,GO:0031175,GO:0043208,GO:0043256,GO:0045198,GO:0045995,GO:0060041,GO:0060441,GO:0060445,GO:0061304,GO:0062023	morphogenesis of an epithelial sheet|signaling receptor binding|extracellular matrix structural constituent|extracellular region|basement membrane|laminin-1 complex|laminin-3 complex|extracellular space|cell-cell junction|protein phosphorylation|cell adhesion|cell surface receptor signaling pathway|protein C-terminus binding|tissue development|membrane|regulation of cell adhesion|regulation of ce…	path:apla04510,path:apla04512	Focal adhesion|ECM-receptor interaction
LAMC3	26.8793	36.7497	17.0089	0.46283	-1.11145	0.00609854	0.0260466	Down	0.564765	0.217528	0.449948	0.26286	0.215315	0.118965	GeneID:101790325	laminin subunit gamma 3	GO:0000904,GO:0005198,GO:0005576,GO:0005604,GO:0007155,GO:0007601,GO:0014002,GO:0016020,GO:0030198,GO:0031012,GO:0060041	cell morphogenesis involved in differentiation|structural molecule activity|extracellular region|basement membrane|cell adhesion|visual perception|astrocyte development|membrane|extracellular matrix organization|extracellular matrix|retina development in camera-type eye	path:apla04510,path:apla04512	Focal adhesion|ECM-receptor interaction
LAMP3	1132.9	175.88	2089.93	11.8827	3.57079	2.11973e-305	8.992e-303	Up	1.44747	1.24581	1.40587	16.1265	17.2021	15.9054	GeneID:101793169	lysosomal associated membrane protein 3	GO:0002250,GO:0005765,GO:0005769,GO:0005886,GO:0010506,GO:0010628,GO:0016021,GO:0030659,GO:0035455,GO:0043154,GO:0048471,GO:1901799,GO:1903900	adaptive immune response|lysosomal membrane|early endosome|plasma membrane|regulation of autophagy|positive regulation of gene expression|integral component of membrane|cytoplasmic vesicle membrane|response to interferon-alpha|negative regulation of cysteine-type endopeptidase activity involved in apoptotic process|perinuclear region of cytoplasm|negative regulation of proteasomal protein catabol…	path:apla04142	Lysosome
LAT2	19.4326	11.3857	27.4794	2.41349	1.27112	0.00815112	0.0333136	Up	0.122702	0.124454	0.0683238	0.402022	0.213389	0.228432	GeneID:101790172	linker for activation of T cells family member 2	GO:0002250,GO:0002764,GO:0005886,GO:0016021,GO:0042113,GO:0042629,GO:0043303	adaptive immune response|immune response-regulating signaling pathway|plasma membrane|integral component of membrane|B cell activation|mast cell granule|mast cell degranulation
LITAF	23.7199	14.303	33.1369	2.31678	1.21212	0.00492419	0.0217458	Up	0.247434	0.385362	0.34915	0.782664	0.511475	0.6476	GeneID:101800838	lipopolysaccharide induced TNF factor	GO:0000139,GO:0001816,GO:0003677,GO:0005125,GO:0005634,GO:0005765,GO:0008270,GO:0009898,GO:0019953,GO:0098559,GO:0098560,GO:0098574	Golgi membrane|cytokine production|DNA binding|cytokine activity|nucleus|lysosomal membrane|zinc ion binding|cytoplasmic side of plasma membrane|sexual reproduction|cytoplasmic side of early endosome membrane|cytoplasmic side of late endosome membrane|cytoplasmic side of lysosomal membrane	path:apla04142	Lysosome
LMCD1	324.92	456.274	193.566	0.424233	-1.23707	2.15933e-22	9.32458e-21	Down	8.3909	8.58918	8.92648	4.14434	2.99284	3.59733	GeneID:101791827	LIM and cysteine rich domains 1	GO:0000122,GO:0003714,GO:0005634,GO:0005737,GO:0008270,GO:0010611,GO:0070886	negative regulation of transcription by RNA polymerase II|transcription corepressor activity|nucleus|cytoplasm|zinc ion binding|regulation of cardiac muscle hypertrophy|positive regulation of calcineurin-NFAT signaling cascade
LMO2	353.757	219.169	488.345	2.22817	1.15586	2.33923e-17	7.36653e-16	Up	4.66464	4.42436	4.42527	10.9637	8.76791	8.95822	GeneID:101804898	LIM domain only 2
LMX1A	34.3221	16.9111	51.7331	3.05912	1.61312	0.000315253	0.00203896	Up	0.539357	0.616007	0.244311	2.35654	0.949302	1.45903	GeneID:101795021	LIM homeobox transcription factor 1 alpha	GO:0000977,GO:0000981,GO:0001228,GO:0001558,GO:0005634,GO:0007411,GO:0007613,GO:0007626,GO:0021542,GO:0021549,GO:0042048,GO:0045665,GO:0045944,GO:0046872,GO:0050808,GO:0071542,GO:1904948	RNA polymerase II regulatory region sequence-specific DNA binding|DNA-binding transcription factor activity, RNA polymerase II-specific|DNA-binding transcription activator activity, RNA polymerase II-specific|regulation of cell growth|nucleus|axon guidance|memory|locomotory behavior|dentate gyrus development|cerebellum development|olfactory behavior|negative regulation of neuron differentiation|p…
LNPEP	2083.82	1356.79	2810.86	2.0717	1.05082	3.91286e-38	3.05055e-36	Up	10.1939	10.2156	10.535	19.2735	19.0339	19.5794	GeneID:101792280	leucyl and cystinyl aminopeptidase	GO:0004177,GO:0005622,GO:0005737,GO:0005886,GO:0005887,GO:0006508,GO:0008270,GO:0012505,GO:0016020,GO:0030163,GO:0030659,GO:0042277,GO:0043171,GO:0048471,GO:0060395,GO:0070006,GO:0120163	aminopeptidase activity|intracellular|cytoplasm|plasma membrane|integral component of plasma membrane|proteolysis|zinc ion binding|endomembrane system|membrane|protein catabolic process|cytoplasmic vesicle membrane|peptide binding|peptide catabolic process|perinuclear region of cytoplasm|SMAD protein signal transduction|metalloaminopeptidase activity|negative regulation of cold-induced thermogene…
LOC101789646	14.8867	9.12577	20.6476	2.26256	1.17796	0.0352084	0.108402	Up	0.339317	0.262515	0.0575156	0.828688	0.19715	0.310055	GeneID:101789646	left-right determination factor 2	GO:0002576,GO:0005125,GO:0005160,GO:0005576,GO:0005615,GO:0007179,GO:0007275,GO:0008083,GO:0010862,GO:0031093,GO:0042981,GO:0043408,GO:0048468,GO:0060395,GO:0062023	platelet degranulation|cytokine activity|transforming growth factor beta receptor binding|extracellular region|extracellular space|transforming growth factor beta receptor signaling pathway|multicellular organism development|growth factor activity|positive regulation of pathway-restricted SMAD protein phosphorylation|platelet alpha granule lumen|regulation of apoptotic process|regulation of MAPK …	path:apla04350	TGF-beta signaling pathway
LOC101789766	1661.75	908.122	2415.38	2.65975	1.41129	2.87509e-29	1.69255e-27	Up	6.22741	7.21245	6.45095	19.5497	17.73	15.1911	GeneID:101789766	excitatory amino acid transporter 1-like	GO:0001504,GO:0005313,GO:0005314,GO:0005886,GO:0005887,GO:0006537,GO:0006811,GO:0007268,GO:0007605,GO:0009416,GO:0009449,GO:0009611,GO:0009986,GO:0014047,GO:0015171,GO:0015501,GO:0015813,GO:0016020,GO:0016595,GO:0021545,GO:0031223,GO:0043005,GO:0043025,GO:0046677,GO:0046872,GO:0048667,GO:0050806,GO:0050885,GO:0051938,GO:0070779,GO:0071805,GO:0098712,GO:0140009,GO:1902476	neurotransmitter uptake|L-glutamate transmembrane transporter activity|high-affinity glutamate transmembrane transporter activity|plasma membrane|integral component of plasma membrane|glutamate biosynthetic process|ion transport|chemical synaptic transmission|sensory perception of sound|response to light stimulus|gamma-aminobutyric acid biosynthetic process|response to wounding|cell surface|gluta…
LOC101789892	68.5461	43.2522	93.84	2.1696	1.11743	1.15638e-05	0.000105962	Up	1.45624	0.736682	0.878879	1.16899	2.47104	2.10562	GeneID:101789892	C-type lectin domain family 2 member L-like	GO:0016021,GO:0030246	integral component of membrane|carbohydrate binding
LOC101789899	974.834	601.353	1348.31	2.24213	1.16487	5.29304e-42	4.43846e-40	Up	10.3385	11.9791	12.0869	27.1305	25.3935	24.397	GeneID:101789899	caspase-1	GO:0005737,GO:0006915,GO:0006919,GO:0072557,GO:0072558,GO:0072559,GO:0097153,GO:0097169,GO:0097194,GO:0097199	cytoplasm|apoptotic process|activation of cysteine-type endopeptidase activity involved in apoptotic process|IPAF inflammasome complex|NLRP1 inflammasome complex|NLRP3 inflammasome complex|cysteine-type endopeptidase activity involved in apoptotic process|AIM2 inflammasome complex|execution phase of apoptosis|cysteine-type endopeptidase activity involved in apoptotic signaling pathway	path:apla04217,path:apla04621,path:apla04623,path:apla04625,path:apla05132,path:apla05164	Necroptosis|NOD-like receptor signaling pathway|Cytosolic DNA-sensing pathway|C-type lectin receptor signaling pathway|Salmonella infection|Influenza A
LOC101789908	10842.1	744.257	20939.9	28.1353	4.81431	0	0	Up	4.43108	4.37519	4.53677	113.45	116.405	113.541	GeneID:101789908	poly [ADP-ribose] polymerase 14	GO:0003950,GO:0005634,GO:0005737,GO:0005829,GO:0006471,GO:0010629,GO:0016020,GO:0019899,GO:0042531,GO:0042532,GO:0045087,GO:0060336,GO:0070212,GO:0070403,GO:1902216	NAD+ ADP-ribosyltransferase activity|nucleus|cytoplasm|cytosol|protein ADP-ribosylation|negative regulation of gene expression|membrane|enzyme binding|positive regulation of tyrosine phosphorylation of STAT protein|negative regulation of tyrosine phosphorylation of STAT protein|innate immune response|negative regulation of interferon-gamma-mediated signaling pathway|protein poly-ADP-ribosylation|…
LOC101789968	10.9315	3.57661	18.2864	5.11279	2.35411	0.000638433	0.00380815	Up	0.0292516	0.0215684	0	0.0947466	0.0972451	0.104748	GeneID:101789968	vasoactive intestinal polypeptide receptor 1	GO:0004999,GO:0005886,GO:0007166,GO:0007187,GO:0008528,GO:0016021,GO:0017046,GO:0043235	vasoactive intestinal polypeptide receptor activity|plasma membrane|cell surface receptor signaling pathway|G protein-coupled receptor signaling pathway, coupled to cyclic nucleotide second messenger|G protein-coupled peptide receptor activity|integral component of membrane|peptide hormone binding|receptor complex	path:apla04080	Neuroactive ligand-receptor interaction
LOC101790017	8.02445	12.0158	4.03314	0.335654	-1.57495	0.0459431	0.133893	Down	0.421982	0.196514	0.524759	0.128609	0	0.33943	GeneID:101790017	C-type lectin domain family 18 member A-like	GO:0005615,GO:0030247	extracellular space|polysaccharide binding
LOC101790071	18.7986	25.7111	11.8861	0.462296	-1.11311	0.0228658	0.0770165	Down	0.0825399	0.0627473	0.0381737	0.0312902	0.0284384	0.00986289	GeneID:101790071	collagen alpha-1(VII) chain-like	GO:0003229,GO:0003429,GO:0005581,GO:0005614,GO:0005615,GO:0007155,GO:0030020,GO:0030199,GO:0031012,GO:0048873,GO:0061050,GO:0062023	ventricular cardiac muscle tissue development|growth plate cartilage chondrocyte morphogenesis|collagen trimer|interstitial matrix|extracellular space|cell adhesion|extracellular matrix structural constituent conferring tensile strength|collagen fibril organization|extracellular matrix|homeostasis of number of cells within a tissue|regulation of cell growth involved in cardiac muscle cell develop…
LOC101790278	6.5702	10.7347	2.40575	0.22411	-2.15772	0.0162424	0.0586392	Down	0.777795	0.686993	0.542356	0.0810675	0.309564	0.0610995	GeneID:101790278	claudin-3	GO:0001666,GO:0003382,GO:0005198,GO:0005923,GO:0016021,GO:0016327,GO:0016328,GO:0016338,GO:0042802,GO:0051260,GO:0051291,GO:0070830	response to hypoxia|epithelial cell morphogenesis|structural molecule activity|bicellular tight junction|integral component of membrane|apicolateral plasma membrane|lateral plasma membrane|calcium-independent cell-cell adhesion via plasma membrane cell-adhesion molecules|identical protein binding|protein homooligomerization|protein heterooligomerization|bicellular tight junction assembly	path:apla04514,path:apla04530	Cell adhesion molecules (CAMs)|Tight junction
LOC101790301	326.989	161.909	492.069	3.03916	1.60367	1.05201e-35	7.7414e-34	Up	1.88188	1.98583	1.69017	5.56866	4.22973	4.22046	GeneID:101790301	endonuclease domain-containing 1 protein	GO:0002576,GO:0003676,GO:0004519,GO:0005576,GO:0005829,GO:0016020,GO:0046872,GO:0070062	platelet degranulation|nucleic acid binding|endonuclease activity|extracellular region|cytosol|membrane|metal ion binding|extracellular exosome
LOC101790497	615.647	65.3622	1165.93	17.838	4.15688	6.85955e-248	2.60356e-245	Up	1.6096	0.987952	1.39347	24.167	22.6791	22.5566	GeneID:101790497	class I histocompatibility antigen, F10 alpha chain	GO:0002474,GO:0005886,GO:0006955,GO:0016021,GO:0042612	antigen processing and presentation of peptide antigen via MHC class I|plasma membrane|immune response|integral component of membrane|MHC class I protein complex	path:apla04144,path:apla04145,path:apla04218,path:apla04514,path:apla05168	Endocytosis|Phagosome|Cellular senescence|Cell adhesion molecules (CAMs)|Herpes simplex infection
LOC101790845	21.6876	11.0338	32.3414	2.93112	1.55145	0.000780968	0.00453276	Up	0.211046	0.68554	0.368337	1.1268	1.76653	1.43492	GeneID:101790845	glutamine amidotransferase-like class 1 domain-containing protein 3A, mitochondrial	GO:0005739	mitochondrion
LOC101790937	685.699	73.8052	1297.59	17.5813	4.13597	2.85457e-266	1.11274e-263	Up	0.851421	0.684189	0.799174	15.332	12.6727	13.6647	GeneID:101790937	uncharacterized LOC101790937	GO:0002230,GO:0004842,GO:0004857,GO:0005634,GO:0005654,GO:0005737,GO:0005764,GO:0005765,GO:0005829,GO:0006302,GO:0006511,GO:0006974,GO:0007219,GO:0008047,GO:0008333,GO:0010390,GO:0015031,GO:0019899,GO:0031901,GO:0032092,GO:0032991,GO:0033522,GO:0033523,GO:0035563,GO:0042393,GO:0044389,GO:0045087,GO:0045893,GO:0046872,GO:0051444,GO:0051607,GO:0051865,GO:0070936,GO:0097677,GO:1900182,GO:1901666,GO:…	positive regulation of defense response to virus by host|ubiquitin-protein transferase activity|enzyme inhibitor activity|nucleus|nucleoplasm|cytoplasm|lysosome|lysosomal membrane|cytosol|double-strand break repair|ubiquitin-dependent protein catabolic process|cellular response to DNA damage stimulus|Notch signaling pathway|enzyme activator activity|endosome to lysosome transport|histone monoubiq…
LOC101790952	15.3785	3.56798	27.1889	7.62026	2.92984	1.62076e-05	0.000142105	Up	0.0289238	0.0895289	0.145848	0.863759	0.755789	0.262627	GeneID:101790952	uncharacterized LOC101790952	GO:0005525,GO:0005739,GO:0005783,GO:0005794,GO:0005829,GO:0070232	GTP binding|mitochondrion|endoplasmic reticulum|Golgi apparatus|cytosol|regulation of T cell apoptotic process
LOC101791120	5223.57	328.761	10118.4	30.7773	4.9438	0	0	Up	7.59144	9.23808	9.30167	199.684	216.093	204.368	GeneID:101791120	interferon-induced 35 kDa protein	GO:0005634,GO:0005829,GO:0060337	nucleus|cytosol|type I interferon signaling pathway
LOC101791268	265.377	37.3801	493.373	13.1988	3.72234	1.01285e-111	2.21339e-109	Up	0.87865	0.827265	0.900324	12.7387	10.074	12.1203	GeneID:101791268	ly6/PLAUR domain-containing protein 2	GO:0005886,GO:0031225	plasma membrane|anchored component of membrane
LOC101791302	4.21229	0.64728	7.77731	12.0154	3.58681	0.00621096	0.026487	Up	0	0	0.034432	0.139092	0.0718347	0.0358473	GeneID:101791302	mucin-5AC	GO:0005576,GO:0030277	extracellular region|maintenance of gastrointestinal epithelium
LOC101791534	15.6273	7.16219	24.0924	3.36384	1.75011	0.00144994	0.00774538	Up	0.103723	0.0584868	0.0463467	0.294196	0.252599	0.17331	GeneID:101791534	zinc finger protein RFP	GO:0000122,GO:0001650,GO:0002820,GO:0003676,GO:0003677,GO:0004842,GO:0005634,GO:0005654,GO:0005730,GO:0005737,GO:0005768,GO:0005769,GO:0005829,GO:0006469,GO:0007283,GO:0008270,GO:0008283,GO:0016605,GO:0019789,GO:0031965,GO:0032720,GO:0032897,GO:0034314,GO:0042147,GO:0042802,GO:0045087,GO:0045814,GO:0046872,GO:0051091,GO:0051127,GO:0061630,GO:0070206,GO:0070534,GO:0072643,GO:0090281,GO:1900041,GO:…	negative regulation of transcription by RNA polymerase II|fibrillar center|negative regulation of adaptive immune response|nucleic acid binding|DNA binding|ubiquitin-protein transferase activity|nucleus|nucleoplasm|nucleolus|cytoplasm|endosome|early endosome|cytosol|negative regulation of protein kinase activity|spermatogenesis|zinc ion binding|cell proliferation|PML body|SUMO transferase activit…
LOC101791564	15.5721	9.10611	22.038	2.42014	1.27509	0.0180593	0.0636721	Up	0.148349	0.234233	0.0425185	0.30645	0.29258	0.297263	GeneID:101791564	probable pleckstrin homology domain-containing family N member 1	GO:0001726,GO:0005085,GO:0005089,GO:0005737,GO:0005925,GO:0005938,GO:0007264,GO:0019901,GO:0030027,GO:0030032,GO:0030426,GO:0032991,GO:0035023,GO:0043065,GO:0043615,GO:0098974,GO:0098982,GO:0099140	ruffle|guanyl-nucleotide exchange factor activity|Rho guanyl-nucleotide exchange factor activity|cytoplasm|focal adhesion|cell cortex|small GTPase mediated signal transduction|protein kinase binding|lamellipodium|lamellipodium assembly|growth cone|protein-containing complex|regulation of Rho protein signal transduction|positive regulation of apoptotic process|astrocyte cell migration|postsynaptic…
LOC101791571	727.576	16.9163	1438.24	85.021	6.40975	1.00226e-67	1.18489e-65	Up	0.820761	1.06623	0.529355	49.2725	56.1487	61.6472	GeneID:101791571	uncharacterized LOC101791571
LOC101791974	259.237	1.94012	516.533	266.237	8.05657	6.59629e-61	7.31833e-59	Up	0	0.0773354	0.0766426	24.9796	22.6202	29.7694	GeneID:101791974	placenta-specific gene 8 protein	GO:0003682,GO:0005634,GO:0008284,GO:0009409,GO:0040015,GO:0042742,GO:0043066,GO:0045944,GO:0050873,GO:0120162	chromatin binding|nucleus|positive regulation of cell proliferation|response to cold|negative regulation of multicellular organism growth|defense response to bacterium|negative regulation of apoptotic process|positive regulation of transcription by RNA polymerase II|brown fat cell differentiation|positive regulation of cold-induced thermogenesis
LOC101791980	6312.69	1592.88	11032.5	6.92613	2.79205	1.51211e-78	2.22543e-76	Up	160.593	166.738	164.821	1341.14	1037.06	1217.59	GeneID:101791980	lymphocyte antigen 6E	GO:0002320,GO:0005886,GO:0008283,GO:0009986,GO:0016020,GO:0030550,GO:0031225	lymphoid progenitor cell differentiation|plasma membrane|cell proliferation|cell surface|membrane|acetylcholine receptor inhibitor activity|anchored component of membrane
LOC101792168	61.0584	35.3938	86.723	2.45023	1.29292	0.000423088	0.00264967	Up	0.308204	0.354361	0.454447	1.2431	0.873112	0.697447	GeneID:101792168	uncharacterized LOC101792168
LOC101792364	347.438	78.4317	616.445	7.85964	2.97446	5.44679e-103	1.10647e-100	Up	2.05943	1.29758	1.11385	11.6978	10.7046	10.5459	GeneID:101792364	torsin-1A	GO:0005524,GO:0005635,GO:0005783,GO:0005788,GO:0006986,GO:0007029,GO:0016887,GO:0031965,GO:0051085,GO:0051260,GO:0070062,GO:0071763	ATP binding|nuclear envelope|endoplasmic reticulum|endoplasmic reticulum lumen|response to unfolded protein|endoplasmic reticulum organization|ATPase activity|nuclear membrane|chaperone cofactor-dependent protein refolding|protein homooligomerization|extracellular exosome|nuclear membrane organization
LOC101792387	70.6129	6.81543	134.41	19.7215	4.3017	5.35985e-40	4.39234e-38	Up	0.0579183	0.115384	0.0692043	1.31682	1.30318	1.36569	GeneID:101792387	uncharacterized LOC101792387	GO:0000145,GO:0000149,GO:0005794,GO:0005829,GO:0006887,GO:0015031,GO:0030426,GO:0030496,GO:0030667,GO:0042734,GO:0045296,GO:0048471,GO:0051601	exocyst|SNARE binding|Golgi apparatus|cytosol|exocytosis|protein transport|growth cone|midbody|secretory granule membrane|presynaptic membrane|cadherin binding|perinuclear region of cytoplasm|exocyst localization
LOC101792564	8.57913	3.25331	13.9049	4.27409	2.09562	0.00662287	0.0279303	Up	0.314683	0.237296	0.236869	1.07052	1.05275	0.637219	GeneID:101792564	lymphocyte antigen 6E	GO:0002320,GO:0005886,GO:0008283,GO:0009986,GO:0016020,GO:0030550,GO:0031225	lymphoid progenitor cell differentiation|plasma membrane|cell proliferation|cell surface|membrane|acetylcholine receptor inhibitor activity|anchored component of membrane
LOC101792766	85.4179	33.7597	137.076	4.06035	2.0216	7.0522e-06	6.74048e-05	Up	0.329484	0.404554	0.547984	1.29384	1.82505	2.01166	GeneID:101792766	cytosolic 5'-nucleotidase 1A	GO:0000166,GO:0000287,GO:0005829,GO:0006195,GO:0008253,GO:0009116,GO:0009128,GO:0046085,GO:0046135	nucleotide binding|magnesium ion binding|cytosol|purine nucleotide catabolic process|5'-nucleotidase activity|nucleoside metabolic process|purine nucleoside monophosphate catabolic process|adenosine metabolic process|pyrimidine nucleoside catabolic process	path:apla00230,path:apla00240,path:apla00760	Purine metabolism|Pyrimidine metabolism|Nicotinate and nicotinamide metabolism
LOC101792932	25.0053	12.3422	37.6684	3.05201	1.60976	0.000174844	0.00121239	Up	0.0697874	0.192393	0.110571	0.303133	0.30564	0.279469	GeneID:101792932	cytosolic phospholipase A2 epsilon	GO:0004622,GO:0004623,GO:0005509,GO:0005544,GO:0005737,GO:0005765,GO:0005829,GO:0006644,GO:0008970,GO:0036149,GO:0036150,GO:0036151,GO:0036152,GO:0046475,GO:0047498,GO:0102567,GO:0102568	lysophospholipase activity|phospholipase A2 activity|calcium ion binding|calcium-dependent phospholipid binding|cytoplasm|lysosomal membrane|cytosol|phospholipid metabolic process|phospholipase A1 activity|phosphatidylinositol acyl-chain remodeling|phosphatidylserine acyl-chain remodeling|phosphatidylcholine acyl-chain remodeling|phosphatidylethanolamine acyl-chain remodeling|glycerophospholipid …	path:apla00564,path:apla00565,path:apla00590,path:apla00591,path:apla00592,path:apla04010,path:apla04217,path:apla04270,path:apla04370,path:apla04912	Glycerophospholipid metabolism|Ether lipid metabolism|Arachidonic acid metabolism|Linoleic acid metabolism|alpha-Linolenic acid metabolism|MAPK signaling pathway|Necroptosis|Vascular smooth muscle contraction|VEGF signaling pathway|GnRH signaling pathway
LOC101793233	67.3811	27.6105	107.152	3.88082	1.95636	2.63083e-13	6.25114e-12	Up	0.77188	0.870695	0.941315	3.17724	2.88087	3.40174	GeneID:101793233	C-type lectin domain family 17, member A	GO:0005537,GO:0009986,GO:0016021,GO:0042806,GO:0046872	mannose binding|cell surface|integral component of membrane|fucose binding|metal ion binding
LOC101793492	6436.55	30.2355	12842.9	424.761	8.73051	0	0	Up	0.309451	0.185884	0.42843	112.29	108.416	107.909	GeneID:101793492	interferon-induced GTP-binding protein Mx-like	GO:0003924,GO:0005525,GO:0005634,GO:0005737	GTPase activity|GTP binding|nucleus|cytoplasm	path:apla05164	Influenza A
LOC101793511	12034	56.8196	24011.1	422.584	8.7231	0	0	Up	0.303209	0.341883	0.498575	141.165	144.539	144.59	GeneID:101793511	sterile alpha motif domain-containing protein 9	GO:0005737,GO:0005829,GO:0034058,GO:0043231	cytoplasm|cytosol|endosomal vesicle fusion|intracellular membrane-bounded organelle
LOC101793639	32.772	20.7906	44.7534	2.15258	1.10606	0.00250746	0.0123853	Up	0.132502	0.251288	0.277547	0.629738	0.428844	0.43045	GeneID:101793639	bile acid receptor-like
LOC101793739	77.8483	17.5556	138.141	7.86878	2.97614	3.9817e-28	2.21476e-26	Up	0.378255	0.367097	0.360835	3.26752	2.41477	2.35011	GeneID:101793739	butyrophilin subfamily 3 member A2	GO:0005102,GO:0009897,GO:0016021,GO:0050776,GO:0050852	signaling receptor binding|external side of plasma membrane|integral component of membrane|regulation of immune response|T cell receptor signaling pathway
LOC101793849	54.1438	23.0685	85.219	3.69417	1.88525	2.03246e-10	3.73905e-09	Up	0.368343	0.347197	0.349719	1.08944	1.22949	1.37128	GeneID:101793849	E-selectin	GO:0005509,GO:0005886,GO:0007155,GO:0016021,GO:0030246	calcium ion binding|plasma membrane|cell adhesion|integral component of membrane|carbohydrate binding	path:apla04514,path:apla04933	Cell adhesion molecules (CAMs)|AGE-RAGE signaling pathway in diabetic complications
LOC101794244	6.05986	9.77339	2.34634	0.240074	-2.05845	0.029879	0.0953629	Down	0.153921	0.0863076	0.0652245	0.0609766	0	0.0112819	GeneID:101794244	neuropeptide Y receptor type 6	GO:0001601,GO:0005886,GO:0016021	peptide YY receptor activity|plasma membrane|integral component of membrane	path:apla04080	Neuroactive ligand-receptor interaction
LOC101794396	212.982	106.642	319.322	2.99432	1.58223	6.80491e-25	3.28252e-23	Up	1.32493	1.16711	1.09302	3.88935	3.38362	3.68916	GeneID:101794396	cytosolic phospholipase A2 epsilon	GO:0004622,GO:0004623,GO:0005509,GO:0005544,GO:0005737,GO:0005765,GO:0005829,GO:0006644,GO:0008970,GO:0036149,GO:0036150,GO:0036151,GO:0036152,GO:0046475,GO:0047498,GO:0102567,GO:0102568	lysophospholipase activity|phospholipase A2 activity|calcium ion binding|calcium-dependent phospholipid binding|cytoplasm|lysosomal membrane|cytosol|phospholipid metabolic process|phospholipase A1 activity|phosphatidylinositol acyl-chain remodeling|phosphatidylserine acyl-chain remodeling|phosphatidylcholine acyl-chain remodeling|phosphatidylethanolamine acyl-chain remodeling|glycerophospholipid …	path:apla00564,path:apla00565,path:apla00590,path:apla00591,path:apla00592,path:apla04010,path:apla04217,path:apla04270,path:apla04370,path:apla04912	Glycerophospholipid metabolism|Ether lipid metabolism|Arachidonic acid metabolism|Linoleic acid metabolism|alpha-Linolenic acid metabolism|MAPK signaling pathway|Necroptosis|Vascular smooth muscle contraction|VEGF signaling pathway|GnRH signaling pathway
LOC101794571	7.86368	3.90059	11.8268	3.03204	1.60029	0.041853	0.124156	Up	0.037255	0.0276424	0.046425	0.103317	0.045302	0.0738949	GeneID:101794571	cytosolic phospholipase A2 epsilon	GO:0004622,GO:0004623,GO:0005509,GO:0005544,GO:0005737,GO:0005765,GO:0005829,GO:0006644,GO:0008970,GO:0036149,GO:0036150,GO:0036151,GO:0036152,GO:0046475,GO:0047498,GO:0102567,GO:0102568	lysophospholipase activity|phospholipase A2 activity|calcium ion binding|calcium-dependent phospholipid binding|cytoplasm|lysosomal membrane|cytosol|phospholipid metabolic process|phospholipase A1 activity|phosphatidylinositol acyl-chain remodeling|phosphatidylserine acyl-chain remodeling|phosphatidylcholine acyl-chain remodeling|phosphatidylethanolamine acyl-chain remodeling|glycerophospholipid …	path:apla00564,path:apla00565,path:apla00590,path:apla00591,path:apla00592,path:apla04010,path:apla04217,path:apla04270,path:apla04370,path:apla04912	Glycerophospholipid metabolism|Ether lipid metabolism|Arachidonic acid metabolism|Linoleic acid metabolism|alpha-Linolenic acid metabolism|MAPK signaling pathway|Necroptosis|Vascular smooth muscle contraction|VEGF signaling pathway|GnRH signaling pathway
LOC101794647	150.618	8.09102	293.144	36.2308	5.17914	5.50522e-95	1.04476e-92	Up	0.0361556	0.429662	0.397485	8.70935	8.50859	8.37928	GeneID:101794647	pancreatic alpha-amylase	GO:0004556,GO:0005615,GO:0005975,GO:0046872,GO:0103025	alpha-amylase activity|extracellular space|carbohydrate metabolic process|metal ion binding|alpha-amylase activity (releasing maltohexaose)	path:apla00500	Starch and sucrose metabolism
LOC101794704	201.811	2.58843	401.033	154.933	7.2755	6.52991e-151	1.74409e-148	Up	0	0.335908	0.496171	67.6624	49.2453	54.0898	GeneID:101794704	interferon alpha-inducible protein 27-like protein 2B
LOC101794709	37.3824	50.0321	24.7328	0.494337	-1.01643	0.00305927	0.0146202	Down	7.59171	11.2625	8.06305	5.46281	4.36361	6.8539	GeneID:101794709	gastrin/cholecystokinin-like peptide	GO:0005179,GO:0005576,GO:0007586	hormone activity|extracellular region|digestion
LOC101794959	54.0602	75.7554	32.3651	0.427232	-1.22691	1.82338e-05	0.000158664	Down	0.814713	0.9637	0.734457	0.274499	0.443412	0.271722	GeneID:101794959	acyl-CoA dehydrogenase family member 11	GO:0000166,GO:0006631,GO:0016627	nucleotide binding|fatty acid metabolic process|oxidoreductase activity, acting on the CH-CH group of donors
LOC101795149	143.674	94.2439	193.105	2.04899	1.03491	7.39247e-09	1.14894e-07	Up	1.6721	1.76943	1.98938	3.93481	3.16574	3.98694	GeneID:101795149	E3 ubiquitin-protein ligase HECTD3	GO:0004842,GO:0019905,GO:0043161,GO:0048471	ubiquitin-protein transferase activity|syntaxin binding|proteasome-mediated ubiquitin-dependent protein catabolic process|perinuclear region of cytoplasm
LOC101795151	137.143	183.318	90.9686	0.496233	-1.01091	3.29992e-08	4.68453e-07	Down	1.70142	1.83092	1.45472	0.800931	0.826316	0.760036	GeneID:101795151	neuropeptide Y receptor type 4	GO:0001602,GO:0004930,GO:0005886,GO:0005887,GO:0007186,GO:0016020,GO:0017046	pancreatic polypeptide receptor activity|G protein-coupled receptor activity|plasma membrane|integral component of plasma membrane|G protein-coupled receptor signaling pathway|membrane|peptide hormone binding	path:apla04080	Neuroactive ligand-receptor interaction
LOC101795347	13.3331	18.8488	7.81739	0.414742	-1.26971	0.0306343	0.0971091	Down	1.01745	1.33338	1.00888	0.528181	0.589461	0.266902	GeneID:101795347	beta-microseminoprotein	GO:0005576	extracellular region
LOC101795385	1523.3	352.771	2693.83	7.6362	2.93285	2.32843e-143	5.89174e-141	Up	7.82537	7.12905	7.59018	51.7614	56.0986	51.0535	GeneID:101795385	OTU domain-containing protein 4
LOC101795398	20.8318	32.8354	8.82828	0.268865	-1.89505	7.9073e-05	0.000596168	Down	1.4348	1.09026	1.44695	0.358554	0.277892	0.230747	GeneID:101795398	myeloid protein 1	GO:0005615,GO:0030851,GO:0044194,GO:0046677,GO:0046872	extracellular space|granulocyte differentiation|cytolytic granule|response to antibiotic|metal ion binding
LOC101795565	9771.98	783.538	18760.4	23.9432	4.58155	0	0	Up	6.50352	6.57183	6.46859	133.878	140.29	140.968	GeneID:101795565	zinc finger CCCH-type antiviral protein 1	GO:0003723,GO:0005634,GO:0005737,GO:0005829,GO:0009615,GO:0032727,GO:0032728,GO:0043123,GO:0045071,GO:0045087,GO:0045296,GO:0046872,GO:0051607,GO:0061014,GO:1900246	RNA binding|nucleus|cytoplasm|cytosol|response to virus|positive regulation of interferon-alpha production|positive regulation of interferon-beta production|positive regulation of I-kappaB kinase/NF-kappaB signaling|negative regulation of viral genome replication|innate immune response|cadherin binding|metal ion binding|defense response to virus|positive regulation of mRNA catabolic process|posit…
LOC101795904	310.544	18.8277	602.261	31.988	4.99946	1.24009e-26	6.52768e-25	Up	0.258158	0.298353	0.287774	10.8602	5.38348	10.7106	GeneID:101795904	interferon regulatory factor 3	GO:0002224,GO:0003700,GO:0005634,GO:0005737,GO:0044212,GO:0051607	toll-like receptor signaling pathway|DNA-binding transcription factor activity|nucleus|cytoplasm|transcription regulatory region DNA binding|defense response to virus	path:apla04620,path:apla04621,path:apla04622,path:apla04623,path:apla05164,path:apla05168	Toll-like receptor signaling pathway|NOD-like receptor signaling pathway|RIG-I-like receptor signaling pathway|Cytosolic DNA-sensing pathway|Influenza A|Herpes simplex infection
LOC101795923	3.56852	0	7.13704	Inf	Inf	0.00100102	0.0056178	Up	0	0	0	0.185594	0.0426721	0.0634605	GeneID:101795923	apoptosis-inducing factor 3-like	GO:0005739,GO:0005743,GO:0005783,GO:0005829,GO:0016491,GO:0046872,GO:0050660,GO:0051537,GO:0097194	mitochondrion|mitochondrial inner membrane|endoplasmic reticulum|cytosol|oxidoreductase activity|metal ion binding|flavin adenine dinucleotide binding|2 iron, 2 sulfur cluster binding|execution phase of apoptosis
LOC101796052	481.84	9.75545	953.924	97.7837	6.61152	1.93636e-37	1.4699e-35	Up	0.876863	0.757149	0.731055	79.2926	103.4	74.8431	GeneID:101796052	interferon-like	GO:0005125,GO:0005126,GO:0005615,GO:0051607	cytokine activity|cytokine receptor binding|extracellular space|defense response to virus
LOC101796105	799.243	99.8496	1498.64	15.0089	3.90775	1.79061e-161	5.06393e-159	Up	1.35488	1.37768	1.3078	22.6708	17.6	20.2904	GeneID:101796105	protein PML			path:apla04120,path:apla04144,path:apla05164,path:apla05168	Ubiquitin mediated proteolysis|Endocytosis|Influenza A|Herpes simplex infection
LOC101796142	523.639	42.6322	1004.65	23.5654	4.5586	6.50191e-45	5.71812e-43	Up	1.91055	1.19489	1.58232	42.3292	41.8949	36.4066	GeneID:101796142	interferon regulatory factor 4
LOC101796474	10.1779	14.6121	5.74364	0.393074	-1.34713	0.0490576	0.141004	Down	0.0643226	0.0693416	0.0990563	0.0439441	0.0164188	0.00565789	GeneID:101796474	myosin heavy chain, skeletal muscle, adult-like	GO:0003774,GO:0005516,GO:0005524,GO:0030016,GO:0032982,GO:0051015	motor activity|calmodulin binding|ATP binding|myofibril|myosin filament|actin filament binding	path:apla04530	Tight junction
LOC101796526	6812.37	3781.79	9842.95	2.60273	1.38002	5.44083e-113	1.20728e-110	Up	14.4528	14.2519	14.7076	33.9208	35.069	34.6991	GeneID:101796526	E3 SUMO-protein ligase RanBP2	GO:0001975,GO:0003723,GO:0003755,GO:0005634,GO:0005635,GO:0005642,GO:0005643,GO:0005737,GO:0005739,GO:0005813,GO:0006111,GO:0006457,GO:0006607,GO:0008536,GO:0016925,GO:0019789,GO:0031965,GO:0033133,GO:0042405,GO:0043547,GO:0044614,GO:0044615,GO:0044877,GO:0046872,GO:0051028,GO:0051642,GO:1990723	response to amphetamine|RNA binding|peptidyl-prolyl cis-trans isomerase activity|nucleus|nuclear envelope|annulate lamellae|nuclear pore|cytoplasm|mitochondrion|centrosome|regulation of gluconeogenesis|protein folding|NLS-bearing protein import into nucleus|Ran GTPase binding|protein sumoylation|SUMO transferase activity|nuclear membrane|positive regulation of glucokinase activity|nuclear inclusi…	path:apla03013	RNA transport
LOC101796528	7.71391	12.032	3.39585	0.282235	-1.82503	0.0242552	0.0807928	Down	0.462663	0.710518	0.257348	0	0.135809	0.262479	GeneID:101796528	ras-related and estrogen-regulated growth inhibitor-like protein	GO:0003924,GO:0005525,GO:0007165,GO:0016020,GO:0048382	GTPase activity|GTP binding|signal transduction|membrane|mesendoderm development
LOC101796567	67.5763	21.4507	113.702	5.30062	2.40616	2.8926e-18	9.81645e-17	Up	0.5235	0.584361	0.226044	2.4428	2.00164	2.2745	GeneID:101796567	interferon alpha-inducible protein 27-like protein 2A
LOC101796621	25.8788	40.9357	10.8218	0.264362	-1.91941	8.59325e-06	8.09813e-05	Down	0.625933	0.53733	0.727137	0.146173	0.0887652	0.21446	GeneID:101796621	urea transporter 2	GO:0015204,GO:0015840,GO:0016021,GO:0016324,GO:0050839	urea transmembrane transporter activity|urea transport|integral component of membrane|apical plasma membrane|cell adhesion molecule binding
LOC101796643	2408.91	810.915	4006.91	4.94123	2.30487	6.06322e-13	1.40821e-11	Up	17.0427	17.5825	15.6603	45.7526	56.304	56.629	GeneID:101796643	C-type lectin domain family 2 member B	GO:0005886,GO:0016021,GO:0030246	plasma membrane|integral component of membrane|carbohydrate binding
LOC101796692	250.989	160.96	341.019	2.11866	1.08315	9.65923e-15	2.5895e-13	Up	1.41654	1.11422	1.18252	2.71613	2.1929	2.57196	GeneID:101796692	uncharacterized LOC101796692	GO:0005634,GO:0006954,GO:0016607,GO:0036464,GO:0050729,GO:0050852,GO:2000321	nucleus|inflammatory response|nuclear speck|cytoplasmic ribonucleoprotein granule|positive regulation of inflammatory response|T cell receptor signaling pathway|positive regulation of T-helper 17 cell differentiation
LOC101796809	1690.66	52.0543	3329.27	63.9575	5.99904	0	0	Up	0.427913	0.338282	0.43817	29.2687	27.8196	28.0078	GeneID:101796809	probable E3 ubiquitin-protein ligase HERC3	GO:0004842,GO:0005829,GO:0031410	ubiquitin-protein transferase activity|cytosol|cytoplasmic vesicle	path:apla04120	Ubiquitin mediated proteolysis
LOC101796889	29.6303	12.3428	46.9177	3.80121	1.92646	1.59575e-06	1.71757e-05	Up	0.0853447	0.128054	0.127931	0.514967	0.529553	0.319493	GeneID:101796889	poly [ADP-ribose] polymerase 12	GO:0003723,GO:0003950,GO:0005634,GO:0046872	RNA binding|NAD+ ADP-ribosyltransferase activity|nucleus|metal ion binding
LOC101797023	306.261	164.024	448.498	2.73434	1.45119	4.91783e-17	1.50915e-15	Up	1.36571	0.779798	0.999514	2.44141	3.0502	2.53714	GeneID:101797023	suppressor of tumorigenicity 14 protein	GO:0001843,GO:0004252,GO:0005576,GO:0005615,GO:0005886,GO:0005887,GO:0006508,GO:0008236,GO:0016323,GO:0016477,GO:0019897,GO:0030216,GO:0060672	neural tube closure|serine-type endopeptidase activity|extracellular region|extracellular space|plasma membrane|integral component of plasma membrane|proteolysis|serine-type peptidase activity|basolateral plasma membrane|cell migration|extrinsic component of plasma membrane|keratinocyte differentiation|epithelial cell morphogenesis involved in placental branching
LOC101797172	188.785	114.263	263.306	2.30439	1.20438	4.30284e-14	1.10427e-12	Up	1.33182	2.07122	2.11953	4.09005	4.40261	3.81054	GeneID:101797172	F-box only protein 33	GO:0016567	protein ubiquitination
LOC101797491	150.632	226.38	74.8844	0.33079	-1.59601	2.51748e-12	5.56042e-11	Down	0.210131	0.16374	0.13702	0.0680466	0.0403821	0.0544554	GeneID:101797491	uncharacterized LOC101797491
LOC101797502	421.51	51.3212	791.699	15.4264	3.94733	1.37447e-79	2.04371e-77	Up	2.04686	2.50977	3.28169	37.6504	38.7455	32.2194	GeneID:101797502	class I histocompatibility antigen, F10 alpha chain-like	GO:0002474,GO:0005886,GO:0006955,GO:0016021,GO:0042612	antigen processing and presentation of peptide antigen via MHC class I|plasma membrane|immune response|integral component of membrane|MHC class I protein complex	path:apla04144,path:apla04145,path:apla04218,path:apla04514,path:apla05168	Endocytosis|Phagosome|Cellular senescence|Cell adhesion molecules (CAMs)|Herpes simplex infection
LOC101797528	1307.83	818.813	1796.84	2.19445	1.13386	1.32289e-46	1.21529e-44	Up	4.13238	3.85211	3.71975	8.97145	7.93651	8.14061	GeneID:101797528	torsin-1A-interacting protein 2	GO:0001671,GO:0005635,GO:0005783,GO:0005789,GO:0007029,GO:0016021,GO:0032781,GO:0051117,GO:0090435	ATPase activator activity|nuclear envelope|endoplasmic reticulum|endoplasmic reticulum membrane|endoplasmic reticulum organization|integral component of membrane|positive regulation of ATPase activity|ATPase binding|protein localization to nuclear envelope
LOC101797569	51613.8	112.785	103115	914.26	9.83646	0	0	Up	1.64924	1.55864	1.605	1278.22	1366.64	1303.58	GeneID:101797569	interferon-induced protein with tetratricopeptide repeats 5	GO:0000049,GO:0000339,GO:0003690,GO:0003723,GO:0003727,GO:0005829,GO:0005886,GO:0008266,GO:0015629,GO:0032587,GO:0043123,GO:0043231,GO:0045071,GO:0045087,GO:0045177,GO:0051607	tRNA binding|RNA cap binding|double-stranded DNA binding|RNA binding|single-stranded RNA binding|cytosol|plasma membrane|poly(U) RNA binding|actin cytoskeleton|ruffle membrane|positive regulation of I-kappaB kinase/NF-kappaB signaling|intracellular membrane-bounded organelle|negative regulation of viral genome replication|innate immune response|apical part of cell|defense response to virus
LOC101797692	1153.79	161.914	2145.67	13.2519	3.72813	0	0	Up	1.53065	1.39766	1.44572	17.8512	18.3433	18.0102	GeneID:101797692	schlafen family member 9	GO:0000049,GO:0004521,GO:0005524,GO:0005622,GO:0005634,GO:0005737,GO:0008270,GO:0051607	tRNA binding|endoribonuclease activity|ATP binding|intracellular|nucleus|cytoplasm|zinc ion binding|defense response to virus
LOC101797703	3.23456	0.32364	6.14548	18.9886	4.24706	0.0106435	0.0414896	Up	0	0	0.024271	0.0684145	0.210368	0.143544	GeneID:101797703	gap junction beta-6 protein	GO:0005922,GO:0007154,GO:0007605,GO:0016021	connexin complex|cell communication|sensory perception of sound|integral component of membrane
LOC101798185	1319.68	1809.46	829.91	0.458651	-1.12453	5.5606e-46	5.01254e-44	Down	15.9154	14.837	14.9518	6.60335	6.76432	6.55048	GeneID:101798185	refilin-A	GO:0005737,GO:0031005,GO:0032432,GO:0048705,GO:0061182,GO:0061572,GO:1900158	cytoplasm|filamin binding|actin filament bundle|skeletal system morphogenesis|negative regulation of chondrocyte development|actin filament bundle organization|negative regulation of bone mineralization involved in bone maturation
LOC101798211	56.1918	75.784	36.5996	0.482946	-1.05007	0.000185743	0.00128119	Down	0.841244	0.759291	0.596912	0.452532	0.353323	0.36542	GeneID:101798211	uncharacterized LOC101798211
LOC101798228	83.194	35.0712	131.317	3.7443	1.90469	2.84658e-15	7.94126e-14	Up	0.552525	0.693073	0.842831	2.19421	2.71885	2.56354	GeneID:101798228	pantetheinase	GO:0005886,GO:0015939,GO:0017159,GO:0031225	plasma membrane|pantothenate metabolic process|pantetheine hydrolase activity|anchored component of membrane	path:apla00770	Pantothenate and CoA biosynthesis
LOC101798268	34.9855	19.1804	50.7906	2.64805	1.40493	0.00208051	0.0105883	Up	0.130014	0.234654	0.117497	0.341057	0.326947	0.541825	GeneID:101798268	melanopsin	GO:0004930,GO:0007601,GO:0007602,GO:0009881,GO:0016021,GO:0018298	G protein-coupled receptor activity|visual perception|phototransduction|photoreceptor activity|integral component of membrane|protein-chromophore linkage
LOC101798298	21.2535	7.13596	35.371	4.95673	2.30939	2.23941e-06	2.34731e-05	Up	0.0877728	0.107768	0.152576	0.49436	0.766357	0.575089	GeneID:101798298	interstitial collagenase	GO:0004222,GO:0008270,GO:0030574,GO:0031012	metalloendopeptidase activity|zinc ion binding|collagen catabolic process|extracellular matrix	path:apla03320	PPAR signaling pathway
LOC101798362	37.0727	10.0694	64.076	6.36342	2.6698	1.75358e-12	3.93341e-11	Up	0.0453611	0.0549338	0.0549987	0.334313	0.277167	0.282333	GeneID:101798362	monocarboxylate transporter 2	GO:0005477,GO:0005886,GO:0005887,GO:0008028,GO:0015129,GO:0015293,GO:0015718,GO:0035873,GO:0050833,GO:1901475	pyruvate secondary active transmembrane transporter activity|plasma membrane|integral component of plasma membrane|monocarboxylic acid transmembrane transporter activity|lactate transmembrane transporter activity|symporter activity|monocarboxylic acid transport|lactate transmembrane transport|pyruvate transmembrane transporter activity|pyruvate transmembrane transport
LOC101798418	112.203	51.2863	173.12	3.37556	1.75513	1.99694e-10	3.67839e-09	Up	0.663464	1.32521	0.799397	3.72767	2.78649	2.46271	GeneID:101798418	vascular non-inflammatory molecule 3			path:apla00770	Pantothenate and CoA biosynthesis
LOC101798516	6840.16	43.9288	13636.4	310.42	8.27808	0	0	Up	0.829073	0.460361	0.53181	168.665	216.873	194.817	GeneID:101798516	interferon-induced, double-stranded RNA-activated protein kinase	GO:0000186,GO:0001819,GO:0003725,GO:0004672,GO:0004694,GO:0004715,GO:0005524,GO:0005634,GO:0005737,GO:0005829,GO:0006412,GO:0006468,GO:0009615,GO:0009636,GO:0017148,GO:0022626,GO:0030968,GO:0032496,GO:0032722,GO:0032874,GO:0033197,GO:0033689,GO:0034198,GO:0035455,GO:0042802,GO:0043065,GO:0043066,GO:0045071,GO:0045087,GO:0046777,GO:0048471,GO:0051092,GO:0051607,GO:1900225,GO:1901224,GO:1901532,GO:…	activation of MAPKK activity|positive regulation of cytokine production|double-stranded RNA binding|protein kinase activity|eukaryotic translation initiation factor 2alpha kinase activity|non-membrane spanning protein tyrosine kinase activity|ATP binding|nucleus|cytoplasm|cytosol|translation|protein phosphorylation|response to virus|response to toxic substance|negative regulation of translation|c…	path:apla04141,path:apla04217,path:apla05164,path:apla05168	Protein processing in endoplasmic reticulum|Necroptosis|Influenza A|Herpes simplex infection
LOC101798651	865.479	236.192	1494.77	6.32859	2.66188	1.80023e-167	5.40932e-165	Up	3.05196	3.24414	3.76835	22.4953	19.8405	20.1359	GeneID:101798651	pantetheinase	GO:0005886,GO:0015939,GO:0017159,GO:0031225	plasma membrane|pantothenate metabolic process|pantetheine hydrolase activity|anchored component of membrane	path:apla00770	Pantothenate and CoA biosynthesis
LOC101798744	3158.56	313.772	6003.35	19.1328	4.25798	5.3623e-243	1.98309e-240	Up	1.64627	2.01586	1.81821	32.7732	32.3308	31.797	GeneID:101798744	poly [ADP-ribose] polymerase 14	GO:0003950,GO:0005634,GO:0005737,GO:0005829,GO:0006471,GO:0010629,GO:0016020,GO:0019899,GO:0042531,GO:0042532,GO:0045087,GO:0060336,GO:0070212,GO:0070403,GO:1902216	NAD+ ADP-ribosyltransferase activity|nucleus|cytoplasm|cytosol|protein ADP-ribosylation|negative regulation of gene expression|membrane|enzyme binding|positive regulation of tyrosine phosphorylation of STAT protein|negative regulation of tyrosine phosphorylation of STAT protein|innate immune response|negative regulation of interferon-gamma-mediated signaling pathway|protein poly-ADP-ribosylation|…
LOC101798847	144.065	4.88014	283.25	58.0414	5.85901	1.57991e-49	1.51914e-47	Up	0.0497946	0.0327042	0.0411922	1.88745	2.58977	1.996	GeneID:101798847	interferon alpha-2	GO:0002250,GO:0002286,GO:0002323,GO:0005125,GO:0005132,GO:0005576,GO:0005615,GO:0006355,GO:0006959,GO:0008285,GO:0009615,GO:0019221,GO:0030101,GO:0030183,GO:0033141,GO:0042100,GO:0043330,GO:0045089,GO:0051607	adaptive immune response|T cell activation involved in immune response|natural killer cell activation involved in immune response|cytokine activity|type I interferon receptor binding|extracellular region|extracellular space|regulation of transcription, DNA-templated|humoral immune response|negative regulation of cell proliferation|response to virus|cytokine-mediated signaling pathway|natural kill…	path:apla04060,path:apla04217,path:apla04620,path:apla04621,path:apla04622,path:apla04623,path:apla05164,path:apla05168	Cytokine-cytokine receptor interaction|Necroptosis|Toll-like receptor signaling pathway|NOD-like receptor signaling pathway|RIG-I-like receptor signaling pathway|Cytosolic DNA-sensing pathway|Influenza A|Herpes simplex infection
LOC101799158	19.4175	11.4002	27.4348	2.40652	1.26695	0.00816519	0.0333427	Up	0.179881	0.104167	0.0841009	0.305338	0.20452	0.272168	GeneID:101799158	uncharacterized LOC101799158
LOC101799189	5.39116	0.96989	9.81243	10.1171	3.33872	0.0026016	0.0127629	Up	0	0.0262902	0	0.0688074	0.0508203	0.078352	GeneID:101799189	lipoxygenase homology domain-containing protein 1	GO:0004096,GO:0007605,GO:0020037,GO:0032420	catalase activity|sensory perception of sound|heme binding|stereocilium
LOC101799835	93.0485	61.0563	125.041	2.04796	1.03419	2.27855e-06	2.38487e-05	Up	1.40067	1.67562	2.16977	3.74433	3.08088	3.64828	GeneID:101799835	probable acyl-CoA dehydrogenase 6	GO:0003995,GO:0005886,GO:0006552,GO:0050660	acyl-CoA dehydrogenase activity|plasma membrane|leucine catabolic process|flavin adenine dinucleotide binding
LOC101800035	12.8609	7.80152	17.9202	2.29702	1.19976	0.043405	0.127918	Up	0.298614	0.216576	0.256538	0.832914	0.356453	0.700687	GeneID:101800035	lipocalin	GO:0005576,GO:0036094	extracellular region|small molecule binding	path:apla00590	Arachidonic acid metabolism
LOC101800036	8.99428	14.9396	3.04899	0.204088	-2.29274	0.0028117	0.0135993	Down	0.392109	0.552683	0.576462	0	0.0958846	0.326766	GeneID:101800036	zinc finger protein ZIC 4	GO:0003677,GO:0005634,GO:0007399,GO:0014029,GO:0046872	DNA binding|nucleus|nervous system development|neural crest formation|metal ion binding
LOC101800424	51.3756	26.6851	76.0661	2.8505	1.51122	3.78739e-07	4.59424e-06	Up	2.96434	1.79563	3.57213	7.96628	8.5272	7.91266	GeneID:101800424	C-C motif chemokine 3	GO:0000165,GO:0001649,GO:0001775,GO:0002548,GO:0004672,GO:0004698,GO:0005615,GO:0005622,GO:0005737,GO:0005829,GO:0006468,GO:0006816,GO:0006874,GO:0006887,GO:0006935,GO:0006954,GO:0007010,GO:0007186,GO:0007267,GO:0008009,GO:0008360,GO:0009636,GO:0010628,GO:0010629,GO:0010818,GO:0014808,GO:0016004,GO:0016301,GO:0019722,GO:0023052,GO:0030335,GO:0030593,GO:0031663,GO:0032760,GO:0042056,GO:0043308,GO:…	MAPK cascade|osteoblast differentiation|cell activation|monocyte chemotaxis|protein kinase activity|calcium-dependent protein kinase C activity|extracellular space|intracellular|cytoplasm|cytosol|protein phosphorylation|calcium ion transport|cellular calcium ion homeostasis|exocytosis|chemotaxis|inflammatory response|cytoskeleton organization|G protein-coupled receptor signaling pathway|cell-cell…
LOC101800429	71.3917	37.9915	104.792	2.7583	1.46378	7.26284e-09	1.13123e-07	Up	0.471796	0.587507	0.713951	1.47829	1.44837	1.74163	GeneID:101800429	C-C chemokine receptor type 5	GO:0000165,GO:0003779,GO:0005737,GO:0005768,GO:0006935,GO:0006954,GO:0006955,GO:0007204,GO:0007267,GO:0009897,GO:0014808,GO:0016021,GO:0016493,GO:0019722,GO:0019956,GO:0019957,GO:0060326,GO:0070723,GO:0071222,GO:0071791	MAPK cascade|actin binding|cytoplasm|endosome|chemotaxis|inflammatory response|immune response|positive regulation of cytosolic calcium ion concentration|cell-cell signaling|external side of plasma membrane|release of sequestered calcium ion into cytosol by sarcoplasmic reticulum|integral component of membrane|C-C chemokine receptor activity|calcium-mediated signaling|chemokine binding|C-C chemok…	path:apla04060,path:apla04144	Cytokine-cytokine receptor interaction|Endocytosis
LOC101800449	158.4	104.296	212.504	2.03751	1.02681	2.05155e-09	3.39627e-08	Up	1.32373	1.41968	1.50914	2.58839	2.74939	2.98088	GeneID:101800449	zinc finger protein 239
LOC101800493	26.6913	4.21492	49.1676	11.6652	3.54413	2.58355e-10	4.70487e-09	Up	0.0244533	0.0494908	0.0855601	0.508451	0.507973	0.818749	GeneID:101800493	immunoglobulin superfamily member 2	GO:0002763,GO:0005886,GO:0007166,GO:0016021,GO:0016812,GO:0070062	positive regulation of myeloid leukocyte differentiation|plasma membrane|cell surface receptor signaling pathway|integral component of membrane|hydrolase activity, acting on carbon-nitrogen (but not peptide) bonds, in cyclic amides|extracellular exosome
LOC101800857	20.9146	28.9589	12.8703	0.444434	-1.16996	0.011803	0.0452411	Down	0.347945	0.1945	0.395971	0.175939	0.121585	0.180277	GeneID:101800857	beta-2 adrenergic receptor	GO:0001540,GO:0002024,GO:0002025,GO:0002028,GO:0002032,GO:0004935,GO:0004941,GO:0005634,GO:0005769,GO:0005887,GO:0006898,GO:0007188,GO:0007190,GO:0008179,GO:0009409,GO:0010739,GO:0015459,GO:0016324,GO:0030501,GO:0031398,GO:0031649,GO:0040015,GO:0042803,GO:0043235,GO:0043410,GO:0044877,GO:0045453,GO:0045944,GO:0045986,GO:0050873,GO:0051379,GO:0051380,GO:0061885,GO:0071880,GO:0071902,GO:0120162,GO:…	amyloid-beta binding|diet induced thermogenesis|norepinephrine-epinephrine-mediated vasodilation involved in regulation of systemic arterial blood pressure|regulation of sodium ion transport|desensitization of G protein-coupled receptor signaling pathway by arrestin|adrenergic receptor activity|beta2-adrenergic receptor activity|nucleus|early endosome|integral component of plasma membrane|recepto…	path:apla04020,path:apla04080,path:apla04261	Calcium signaling pathway|Neuroactive ligand-receptor interaction|Adrenergic signaling in cardiomyocytes
LOC101800860	7515.88	262.788	14769	56.201	5.81253	0	0	Up	1.33526	1.53364	1.64193	75.7062	79.5139	76.4732	GeneID:101800860	sterile alpha motif domain-containing protein 9-like	GO:0005737,GO:0005769,GO:0034058	cytoplasm|early endosome|endosomal vesicle fusion
LOC101800921	3987.42	419.867	7554.98	17.9937	4.16942	8.10555e-21	3.21171e-19	Up	52.5306	44.2297	41.3968	739.685	1067.48	939.561	GeneID:101800921	C-C motif chemokine 4-like	GO:0002548,GO:0005615,GO:0006954,GO:0007186,GO:0008009,GO:0030593,GO:0035690,GO:0043547,GO:0048020,GO:0048245,GO:0048247,GO:0070098,GO:0070374,GO:0071346,GO:0071347,GO:0071356	monocyte chemotaxis|extracellular space|inflammatory response|G protein-coupled receptor signaling pathway|chemokine activity|neutrophil chemotaxis|cellular response to drug|positive regulation of GTPase activity|CCR chemokine receptor binding|eosinophil chemotaxis|lymphocyte chemotaxis|chemokine-mediated signaling pathway|positive regulation of ERK1 and ERK2 cascade|cellular response to interfer…	path:apla04060,path:apla04620,path:apla04623,path:apla05132	Cytokine-cytokine receptor interaction|Toll-like receptor signaling pathway|Cytosolic DNA-sensing pathway|Salmonella infection
LOC101800938	1292.4	123.244	2461.55	19.973	4.31998	6.2594e-77	9.02793e-75	Up	11.7788	7.3005	7.00031	164.137	221.379	188.89	GeneID:101800938	C-C motif chemokine 4	GO:0002548,GO:0005615,GO:0006954,GO:0007186,GO:0008009,GO:0030593,GO:0035690,GO:0043547,GO:0048020,GO:0048245,GO:0048247,GO:0070098,GO:0070374,GO:0071346,GO:0071347,GO:0071356	monocyte chemotaxis|extracellular space|inflammatory response|G protein-coupled receptor signaling pathway|chemokine activity|neutrophil chemotaxis|cellular response to drug|positive regulation of GTPase activity|CCR chemokine receptor binding|eosinophil chemotaxis|lymphocyte chemotaxis|chemokine-mediated signaling pathway|positive regulation of ERK1 and ERK2 cascade|cellular response to interfer…	path:apla04060,path:apla04620,path:apla04623,path:apla05132	Cytokine-cytokine receptor interaction|Toll-like receptor signaling pathway|Cytosolic DNA-sensing pathway|Salmonella infection
LOC101800956	135.19	75.4262	194.953	2.58469	1.36999	2.10979e-13	5.06313e-12	Up	0.430972	0.421708	0.227715	0.863046	1.17814	1.09117	GeneID:101800956	lymphoid-restricted membrane protein	GO:0000785,GO:0005789,GO:0005813,GO:0007052,GO:0007344,GO:0016021,GO:0031965,GO:0035046,GO:0051028,GO:0051984,GO:0072686,GO:0097431	chromatin|endoplasmic reticulum membrane|centrosome|mitotic spindle organization|pronuclear fusion|integral component of membrane|nuclear membrane|pronuclear migration|mRNA transport|positive regulation of chromosome segregation|mitotic spindle|mitotic spindle pole
LOC101800964	27.4986	14.6549	40.3423	2.75282	1.46091	0.000303698	0.00197486	Up	3.65897	1.2882	2.31469	6.59366	5.93719	8.72714	GeneID:101800964	interleukin-8	GO:0001525,GO:0002232,GO:0002269,GO:0002548,GO:0005125,GO:0005153,GO:0005615,GO:0006954,GO:0006955,GO:0008009,GO:0008083,GO:0010628,GO:0030097,GO:0030593,GO:0030595,GO:0036446,GO:0042060,GO:0042119,GO:0048147,GO:0048246,GO:0048247,GO:0050729,GO:0061844,GO:0070098,GO:0071222	angiogenesis|leukocyte chemotaxis involved in inflammatory response|leukocyte activation involved in inflammatory response|monocyte chemotaxis|cytokine activity|interleukin-8 receptor binding|extracellular space|inflammatory response|immune response|chemokine activity|growth factor activity|positive regulation of gene expression|hemopoiesis|neutrophil chemotaxis|leukocyte chemotaxis|myofibroblast…	path:apla04060	Cytokine-cytokine receptor interaction
LOC101801566	200.412	126.73	274.093	2.16281	1.1129	6.60538e-13	1.52431e-11	Up	0.22232	0.278805	0.232573	0.395176	0.48586	0.510927	GeneID:101801566	elongation of very long chain fatty acids protein 4	GO:0005783,GO:0006636,GO:0009922,GO:0019367,GO:0030176,GO:0034626,GO:0035338,GO:0042761,GO:0102336,GO:0102337,GO:0102338,GO:0102756	endoplasmic reticulum|unsaturated fatty acid biosynthetic process|fatty acid elongase activity|fatty acid elongation, saturated fatty acid|integral component of endoplasmic reticulum membrane|fatty acid elongation, polyunsaturated fatty acid|long-chain fatty-acyl-CoA biosynthetic process|very long-chain fatty acid biosynthetic process|3-oxo-arachidoyl-CoA synthase activity|3-oxo-cerotoyl-CoA synt…	path:apla00062,path:apla01040	Fatty acid elongation|Biosynthesis of unsaturated fatty acids
LOC101801932	33.6056	16.564	50.6471	3.05767	1.61243	1.32107e-05	0.000118789	Up	0.299659	0.280185	0.408534	0.622437	1.02262	1.0303	GeneID:101801932	thiamine transporter 2	GO:0015234,GO:0015888,GO:0016021	thiamine transmembrane transporter activity|thiamine transport|integral component of membrane
LOC101801995	22.4402	30.2638	14.6165	0.482969	-1.05	0.018247	0.0641894	Down	2.02646	1.13679	1.09575	0.625979	0.440549	0.780583	GeneID:101801995	retinol dehydrogenase 8	GO:0004303,GO:0004745,GO:0005737,GO:0005887,GO:0006694,GO:0006703,GO:0007601,GO:0050896,GO:0052650	estradiol 17-beta-dehydrogenase activity|retinol dehydrogenase activity|cytoplasm|integral component of plasma membrane|steroid biosynthetic process|estrogen biosynthetic process|visual perception|response to stimulus|NADP-retinol dehydrogenase activity	path:apla00830	Retinol metabolism
LOC101802072	408.931	132.031	685.832	5.19447	2.37698	4.23342e-75	5.6017e-73	Up	3.69384	2.89602	3.25168	15.2749	16.104	14.7786	GeneID:101802072	uncharacterized LOC101802072			path:apla04060	Cytokine-cytokine receptor interaction
LOC101802145	205.735	97.1415	314.329	3.23579	1.69412	1.18401e-25	5.95014e-24	Up	0.557902	0.678092	0.544852	2.11026	1.74725	1.76676	GeneID:101802145	sulfate transporter	GO:0001503,GO:0005886,GO:0005887,GO:0006811,GO:0008271,GO:0015106,GO:0015108,GO:0015116,GO:0015301,GO:0016020,GO:0016021,GO:0016324,GO:0019531,GO:0031528,GO:0042391,GO:0050428,GO:0070062,GO:1902358	ossification|plasma membrane|integral component of plasma membrane|ion transport|secondary active sulfate transmembrane transporter activity|bicarbonate transmembrane transporter activity|chloride transmembrane transporter activity|sulfate transmembrane transporter activity|anion:anion antiporter activity|membrane|integral component of membrane|apical plasma membrane|oxalate transmembrane transpo…
LOC101802261	39.9458	18.1798	61.7118	3.39453	1.76321	2.46231e-07	3.06155e-06	Up	0.117672	0.149791	0.183582	0.508731	0.437582	0.522123	GeneID:101802261	thiamine transporter 2	GO:0015234,GO:0015888,GO:0016021	thiamine transmembrane transporter activity|thiamine transport|integral component of membrane
LOC101802417	727.508	468.868	986.148	2.10325	1.07262	2.09931e-30	1.2722e-28	Up	14.3025	15.4109	15.7942	33.2665	30.9304	31.2412	GeneID:101802417	cytosolic 5'-nucleotidase 1B	GO:0000166,GO:0000287,GO:0005829,GO:0008253,GO:0009116,GO:0009117,GO:0046085	nucleotide binding|magnesium ion binding|cytosol|5'-nucleotidase activity|nucleoside metabolic process|nucleotide metabolic process|adenosine metabolic process	path:apla00230,path:apla00240,path:apla00760	Purine metabolism|Pyrimidine metabolism|Nicotinate and nicotinamide metabolism
LOC101802673	20.1027	27.2772	12.9282	0.473957	-1.07717	0.0217335	0.0740406	Down	0.388885	0.666294	0.363309	0.258011	0.0914976	0.223849	GeneID:101802673	cadherin EGF LAG seven-pass G-type receptor 2-like	GO:0004930,GO:0005509,GO:0005737,GO:0005886,GO:0006355,GO:0007156,GO:0007186,GO:0016021,GO:0016055,GO:0021999,GO:0022407,GO:0048813,GO:0060071	G protein-coupled receptor activity|calcium ion binding|cytoplasm|plasma membrane|regulation of transcription, DNA-templated|homophilic cell adhesion via plasma membrane adhesion molecules|G protein-coupled receptor signaling pathway|integral component of membrane|Wnt signaling pathway|neural plate anterior/posterior regionalization|regulation of cell-cell adhesion|dendrite morphogenesis|Wnt sign…
LOC101802744	109.4	69.5589	149.242	2.14554	1.10134	6.02197e-08	8.32741e-07	Up	1.01229	0.996441	0.762321	1.84494	1.7569	2.19025	GeneID:101802744	carbonic anhydrase 2	GO:0004089,GO:0005623,GO:0005737,GO:0005886,GO:0008270,GO:0071244	carbonate dehydratase activity|cell|cytoplasm|plasma membrane|zinc ion binding|cellular response to carbon dioxide	path:apla00910	Nitrogen metabolism
LOC101802866	4984.7	800.62	9168.78	11.4521	3.51754	0	0	Up	8.51727	8.51699	7.36113	85.6254	85.4732	85.9865	GeneID:101802866	poly [ADP-ribose] polymerase 12	GO:0003723,GO:0003950,GO:0005634,GO:0046872	RNA binding|NAD+ ADP-ribosyltransferase activity|nucleus|metal ion binding
LOC101802909	248.845	150.762	346.928	2.30117	1.20237	1.59185e-10	2.95486e-09	Up	12.4228	12.5453	14.8525	33.742	36.5066	26.0278	GeneID:101802909	C-C motif chemokine 4 homolog	GO:0002548,GO:0005615,GO:0006954,GO:0007186,GO:0008009,GO:0030593,GO:0043547,GO:0048020,GO:0048245,GO:0048247,GO:0070098,GO:0070374,GO:0071346,GO:0071347,GO:0071356	monocyte chemotaxis|extracellular space|inflammatory response|G protein-coupled receptor signaling pathway|chemokine activity|neutrophil chemotaxis|positive regulation of GTPase activity|CCR chemokine receptor binding|eosinophil chemotaxis|lymphocyte chemotaxis|chemokine-mediated signaling pathway|positive regulation of ERK1 and ERK2 cascade|cellular response to interferon-gamma|cellular response…	path:apla04060,path:apla04620,path:apla04623,path:apla05132	Cytokine-cytokine receptor interaction|Toll-like receptor signaling pathway|Cytosolic DNA-sensing pathway|Salmonella infection
LOC101802962	7.03323	11.6904	2.37606	0.203248	-2.29868	0.00880111	0.0354874	Down	0.127267	0.223117	0.140044	0	0.0287474	0.057516	GeneID:101802962	protein NDNF	GO:0001764,GO:0005539,GO:0005576,GO:0008201,GO:0010811,GO:0010976,GO:0019800,GO:0030198,GO:0031012,GO:0043524	neuron migration|glycosaminoglycan binding|extracellular region|heparin binding|positive regulation of cell-substrate adhesion|positive regulation of neuron projection development|peptide cross-linking via chondroitin 4-sulfate glycosaminoglycan|extracellular matrix organization|extracellular matrix|negative regulation of neuron apoptotic process
LOC101803211	31.2721	3.58041	58.9637	16.4684	4.04163	1.04567e-17	3.38915e-16	Up	0.0905541	0.0590145	0	0.884513	0.643726	0.835514	GeneID:101803211	uncharacterized LOC101803211
LOC101803350	85.2048	23.4387	146.971	6.27042	2.64856	6.92474e-26	3.55429e-24	Up	0.33492	0.149925	0.184494	1.38389	1.28914	1.04115	GeneID:101803350	nuclear GTPase SLIP-GC-like	GO:0003924,GO:0005525,GO:0016607,GO:0033262,GO:0043066,GO:0071222,GO:0097752	GTPase activity|GTP binding|nuclear speck|regulation of nuclear cell cycle DNA replication|negative regulation of apoptotic process|cellular response to lipopolysaccharide|regulation of DNA stability
LOC101803633	7.58181	1.94495	13.2187	6.7964	2.76477	0.00147363	0.00786027	Up	0.01831	0.0369645	0.0182939	0.219999	0.172033	0.208061	GeneID:101803633	sulfotransferase family cytosolic 2B member 1	GO:0000103,GO:0003676,GO:0004027,GO:0005634,GO:0005737,GO:0005783,GO:0005829,GO:0008202,GO:0008203,GO:0008285,GO:0015485,GO:0043231,GO:0045606,GO:0050294,GO:0050427,GO:0070062,GO:1990239	sulfate assimilation|nucleic acid binding|alcohol sulfotransferase activity|nucleus|cytoplasm|endoplasmic reticulum|cytosol|steroid metabolic process|cholesterol metabolic process|negative regulation of cell proliferation|cholesterol binding|intracellular membrane-bounded organelle|positive regulation of epidermal cell differentiation|steroid sulfotransferase activity|3'-phosphoadenosine 5'-phosp…	path:apla00140	Steroid hormone biosynthesis
LOC101803782	2.11677	4.23354	0	0	#NAME?	0.0214472	0.0733536	Down	0.0811883	0.0319113	0.0161084	0	0	0	GeneID:101803782	astacin-like metalloendopeptidase	GO:0004222,GO:0005737,GO:0005886,GO:0007155,GO:0008233,GO:0008270,GO:0009566,GO:0010954,GO:0030133,GO:0060468,GO:0060473,GO:0070001,GO:0070002,GO:2000360	metalloendopeptidase activity|cytoplasm|plasma membrane|cell adhesion|peptidase activity|zinc ion binding|fertilization|positive regulation of protein processing|transport vesicle|prevention of polyspermy|cortical granule|aspartic-type peptidase activity|glutamic-type peptidase activity|negative regulation of binding of sperm to zona pellucida
LOC101803823	45.2159	25.9747	64.457	2.48152	1.31123	3.01455e-05	0.000249735	Up	0.443533	0.725507	0.656404	1.71569	1.37168	1.15407	GeneID:101803823	gamma-aminobutyric acid receptor subunit pi	GO:0004890,GO:0005230,GO:0005254,GO:0005887,GO:0007165,GO:0007268,GO:0030054,GO:0034220,GO:0034707,GO:0042391,GO:0043005,GO:0045202,GO:0045211,GO:0050877,GO:1902711	GABA-A receptor activity|extracellular ligand-gated ion channel activity|chloride channel activity|integral component of plasma membrane|signal transduction|chemical synaptic transmission|cell junction|ion transmembrane transport|chloride channel complex|regulation of membrane potential|neuron projection|synapse|postsynaptic membrane|nervous system process|GABA-A receptor complex	path:apla04080	Neuroactive ligand-receptor interaction
LOC101803976	15.4382	9.44595	21.4304	2.26874	1.18189	0.029166	0.0937092	Up	0.336816	0.170639	0.14544	0.617464	0.5479	0.27807	GeneID:101803976	soluble scavenger receptor cysteine-rich domain-containing protein SSC5D	GO:0001968,GO:0005044,GO:0005615,GO:0005622,GO:0005737,GO:0007275,GO:0009897,GO:0042494,GO:0043236,GO:0045087,GO:0050829,GO:0050830,GO:0050840,GO:0062023,GO:2000483	fibronectin binding|scavenger receptor activity|extracellular space|intracellular|cytoplasm|multicellular organism development|external side of plasma membrane|detection of bacterial lipoprotein|laminin binding|innate immune response|defense response to Gram-negative bacterium|defense response to Gram-positive bacterium|extracellular matrix binding|collagen-containing extracellular matrix|negativ…
LOC101804095	109.434	66.6375	152.23	2.28444	1.19184	4.98801e-09	7.87975e-08	Up	1.49401	1.31933	1.57356	3.07112	2.77045	3.49079	GeneID:101804095	serine protease inhibitor 2.1	GO:0004867,GO:0005615,GO:0010951,GO:0034097,GO:0043434	serine-type endopeptidase inhibitor activity|extracellular space|negative regulation of endopeptidase activity|response to cytokine|response to peptide hormone
LOC101804340	4.57953	7.80429	1.35477	0.173593	-2.52622	0.0268406	0.087743	Down	0.0953421	0.187782	0.0473433	0.0219707	0.0234681	0.0475263	GeneID:101804340	uncharacterized LOC101804340	GO:0003823,GO:0006910,GO:0006911,GO:0006958,GO:0009897,GO:0034987,GO:0042571,GO:0042742,GO:0045087,GO:0050853,GO:0050871	antigen binding|phagocytosis, recognition|phagocytosis, engulfment|complement activation, classical pathway|external side of plasma membrane|immunoglobulin receptor binding|immunoglobulin complex, circulating|defense response to bacterium|innate immune response|B cell receptor signaling pathway|positive regulation of B cell activation
LOC101804439	38.9264	1.95461	75.8982	38.8304	5.27911	2.23182e-18	7.64598e-17	Up	0.0406711	0.0413916	0	1.41975	0.802787	0.927976	GeneID:101804439	butyrophilin subfamily 1 member A1	GO:0005102,GO:0009897,GO:0016021,GO:0050776,GO:0050852	signaling receptor binding|external side of plasma membrane|integral component of membrane|regulation of immune response|T cell receptor signaling pathway
LOC101804639	340.664	29.5062	651.822	22.0911	4.46539	7.80691e-70	9.62386e-68	Up	0.076061	0.218103	0.242039	4.76817	3.82068	3.83609	GeneID:101804639	atrial natriuretic peptide receptor 1-like	GO:0001653,GO:0004383,GO:0004672,GO:0005524,GO:0005525,GO:0005622,GO:0005886,GO:0006182,GO:0007165,GO:0007166,GO:0007168,GO:0007589,GO:0008217,GO:0008528,GO:0010753,GO:0016021,GO:0016525,GO:0016941,GO:0017046,GO:0019901,GO:0019934,GO:0030308,GO:0035810,GO:0035815,GO:0042417,GO:0042562,GO:0043114,GO:0043235,GO:0048662,GO:0097746,GO:1903779	peptide receptor activity|guanylate cyclase activity|protein kinase activity|ATP binding|GTP binding|intracellular|plasma membrane|cGMP biosynthetic process|signal transduction|cell surface receptor signaling pathway|receptor guanylyl cyclase signaling pathway|body fluid secretion|regulation of blood pressure|G protein-coupled peptide receptor activity|positive regulation of cGMP-mediated signali…
LOC101804640	54.8987	73.4467	36.3507	0.494927	-1.01471	0.000329974	0.00212845	Down	3.14824	2.81985	2.98778	1.61	1.47313	1.82849	GeneID:101804640	protein eva-1 homolog C	GO:0005576,GO:0005886,GO:0008201,GO:0016021,GO:0030246	extracellular region|plasma membrane|heparin binding|integral component of membrane|carbohydrate binding
LOC101804743	136.815	83.8908	189.738	2.26173	1.17743	1.53122e-10	2.84964e-09	Up	1.94627	1.7157	2.14423	3.90405	3.60811	4.15671	GeneID:101804743	butyrophilin subfamily 1 member A1	GO:0005102,GO:0009897,GO:0016021,GO:0050776,GO:0050852	signaling receptor binding|external side of plasma membrane|integral component of membrane|regulation of immune response|T cell receptor signaling pathway
LOC101804833	24.8671	33.7614	15.9728	0.473107	-1.07976	0.0102922	0.0403931	Down	0.342719	0.467625	0.5318	0.117243	0.206506	0.237813	GeneID:101804833	prostatic acid phosphatase	GO:0003993,GO:0005615,GO:0005622,GO:0005886,GO:0006144,GO:0006772,GO:0008253,GO:0009117,GO:0012506,GO:0016021,GO:0016311,GO:0016791,GO:0030175,GO:0042131,GO:0042803,GO:0046085,GO:0051289,GO:0051930,GO:0052642,GO:0060168	acid phosphatase activity|extracellular space|intracellular|plasma membrane|purine nucleobase metabolic process|thiamine metabolic process|5'-nucleotidase activity|nucleotide metabolic process|vesicle membrane|integral component of membrane|dephosphorylation|phosphatase activity|filopodium|thiamine phosphate phosphatase activity|protein homodimerization activity|adenosine metabolic process|protei…
LOC101804866	1.68975	0	3.3795	Inf	Inf	0.0467668	0.135914	Up	0	0	0	0.0460122	0.0252976	0.0513415	GeneID:101804866	C-type lectin domain family 2 member B	GO:0016021,GO:0030246	integral component of membrane|carbohydrate binding
LOC101804875	361.903	73.8017	650.005	8.80744	3.13872	9.96148e-69	1.19729e-66	Up	2.21079	1.89957	2.115	14.26	16.8665	15.138	GeneID:101804875	E3 ubiquitin-protein ligase TRIM39-like	GO:0005739,GO:0005829,GO:0006915,GO:0008270,GO:0016567,GO:0016740,GO:0042802,GO:2000059,GO:2001235	mitochondrion|cytosol|apoptotic process|zinc ion binding|protein ubiquitination|transferase activity|identical protein binding|negative regulation of ubiquitin-dependent protein catabolic process|positive regulation of apoptotic signaling pathway
LOC101805050	13.7145	8.45192	18.9772	2.24531	1.16691	0.0424878	0.125703	Up	0.195316	0.204042	0.175002	0.527024	0.33791	0.324351	GeneID:101805050	brain-specific homeobox/POU domain protein 3	GO:0003700,GO:0005634,GO:0043565	DNA-binding transcription factor activity|nucleus|sequence-specific DNA binding
LOC101805457	33.212	13.6422	52.7817	3.86899	1.95196	3.43752e-06	3.46709e-05	Up	0.125984	0.127325	0.168058	0.403029	0.717459	0.580346	GeneID:101805457	E3 ubiquitin-protein ligase TRIM39-like	GO:0000122,GO:0001650,GO:0002820,GO:0003676,GO:0003677,GO:0004842,GO:0005634,GO:0005654,GO:0005730,GO:0005737,GO:0005768,GO:0005769,GO:0005829,GO:0006469,GO:0007283,GO:0008270,GO:0008283,GO:0016605,GO:0019789,GO:0031965,GO:0032720,GO:0032897,GO:0034314,GO:0042147,GO:0042802,GO:0045087,GO:0045814,GO:0046872,GO:0051091,GO:0051127,GO:0061630,GO:0070206,GO:0070534,GO:0072643,GO:0090281,GO:1900041,GO:…	negative regulation of transcription by RNA polymerase II|fibrillar center|negative regulation of adaptive immune response|nucleic acid binding|DNA binding|ubiquitin-protein transferase activity|nucleus|nucleoplasm|nucleolus|cytoplasm|endosome|early endosome|cytosol|negative regulation of protein kinase activity|spermatogenesis|zinc ion binding|cell proliferation|PML body|SUMO transferase activit…
LOC106014260	5203.78	3281.09	7126.47	2.17198	1.11901	4.87522e-34	3.38054e-32	Up	20.4375	18.9511	18.5512	36.4742	37.3294	36.339	GeneID:106014260	A-kinase anchor protein 2	GO:0007015,GO:0007178,GO:0008104,GO:0019904,GO:0032991,GO:0051018,GO:0051291	actin filament organization|transmembrane receptor protein serine/threonine kinase signaling pathway|protein localization|protein domain specific binding|protein-containing complex|protein kinase A binding|protein heterooligomerization
LOC106014693	985.812	652.764	1318.86	2.02042	1.01466	9.66905e-09	1.47106e-07	Up	26.3093	29.1508	24.4557	60.1069	68.6117	53.564	GeneID:106014693	BTB/POZ domain-containing protein KCTD12-like	GO:0003723,GO:0030054,GO:0042734,GO:0042802,GO:0045211,GO:0051260	RNA binding|cell junction|presynaptic membrane|identical protein binding|postsynaptic membrane|protein homooligomerization
LOC106014761	82.0759	53.0556	111.096	2.09396	1.06623	4.62121e-06	4.56206e-05	Up	3.28615	2.4906	2.23715	5.32492	5.78621	4.83018	GeneID:106014761	palmitoyltransferase ZDHHC20-like	GO:0005783,GO:0005794,GO:0005886,GO:0006612,GO:0008270,GO:0016020,GO:0016409,GO:0018230,GO:0018345,GO:0019706,GO:0030173,GO:0048471	endoplasmic reticulum|Golgi apparatus|plasma membrane|protein targeting to membrane|zinc ion binding|membrane|palmitoyltransferase activity|peptidyl-L-cysteine S-palmitoylation|protein palmitoylation|protein-cysteine S-palmitoyltransferase activity|integral component of Golgi membrane|perinuclear region of cytoplasm
LOC106015872	20.0202	0.328125	39.7124	121.028	6.9192	1.16206e-09	1.9718e-08	Up	0.0128828	0	0	0.454931	0.469078	0.231997	GeneID:106015872	interleukin-7	GO:0001961,GO:0002360,GO:0005125,GO:0005139,GO:0005576,GO:0005615,GO:0006955,GO:0008083,GO:0010468,GO:0019221,GO:0030890,GO:0032722,GO:0043086,GO:0045453,GO:0045582,GO:0046622,GO:0048873,GO:2001237,GO:2001240	positive regulation of cytokine-mediated signaling pathway|T cell lineage commitment|cytokine activity|interleukin-7 receptor binding|extracellular region|extracellular space|immune response|growth factor activity|regulation of gene expression|cytokine-mediated signaling pathway|positive regulation of B cell proliferation|positive regulation of chemokine production|negative regulation of catalyti…	path:apla04060	Cytokine-cytokine receptor interaction
LOC106016586	129.644	9.75993	249.527	25.5665	4.67618	5.11339e-76	7.09138e-74	Up	0.0891898	0.0391718	0.0886898	1.26819	1.18105	1.12917	GeneID:106016586	uncharacterized LOC106016586
LOC106017738	591.887	295.911	887.862	3.00044	1.58517	5.71534e-54	5.8051e-52	Up	11.3177	9.16031	9.87792	27.4697	27.4907	26.7236	GeneID:106017738	synaptojanin-2-binding protein	GO:0001937,GO:0005739,GO:0006605,GO:0007266,GO:0007268,GO:0008022,GO:0008593,GO:0010596,GO:0016323,GO:0016525,GO:0030054,GO:0030100,GO:0031307,GO:0031594,GO:0035255,GO:0043005,GO:0043113,GO:0045197,GO:0048312,GO:0070373,GO:0097120,GO:0098609,GO:0098839,GO:1903671	negative regulation of endothelial cell proliferation|mitochondrion|protein targeting|Rho protein signal transduction|chemical synaptic transmission|protein C-terminus binding|regulation of Notch signaling pathway|negative regulation of endothelial cell migration|basolateral plasma membrane|negative regulation of angiogenesis|cell junction|regulation of endocytosis|integral component of mitochond…
LOC106018440	7.3078	0.328125	14.2875	43.5427	5.44436	4.93859e-06	4.84883e-05	Up	0.0181458	0	0	0.123916	0.222948	0.273606	GeneID:106018440	angiopoietin-related protein 7-like	GO:0005576	extracellular region
LOC106020333	10.8244	16.249	5.39979	0.332316	-1.58937	0.0174375	0.0620072	Down	0	0	0	0	0	0	GeneID:106020333	uncharacterized LOC106020333
LOC110351189	13.1307	4.5465	21.7149	4.77619	2.25586	0.000290252	0.0018994	Up	0.102644	0.104785	0.0775012	0.64028	0.51977	0.400715	GeneID:110351189	butyrophilin subfamily 3 member A2	GO:0005102,GO:0009897,GO:0016021,GO:0050776,GO:0050852	signaling receptor binding|external side of plasma membrane|integral component of membrane|regulation of immune response|T cell receptor signaling pathway
LOC110351494	205.697	85.1233	326.271	3.83292	1.93844	4.78991e-34	3.33743e-32	Up	0.296156	0.364049	0.27291	1.08434	1.08315	1.3819	GeneID:110351494	voltage-dependent P/Q-type calcium channel subunit alpha-1A-like
LOC110351730	5.26516	1.30319	9.22713	7.08044	2.82384	0.0256683	0.0847559	Up	0.022076	0	0	0	0.27196	0.158371	GeneID:110351730	cysteine-rich venom protein-like
LOC110353866	5691.68	449.111	10934.2	24.3464	4.60564	0	0	Up	4.42802	4.52322	4.51821	100.278	105.789	102.521	GeneID:110353866	interferon-induced, double-stranded RNA-activated protein kinase	GO:0000186,GO:0001819,GO:0003725,GO:0004672,GO:0004694,GO:0004715,GO:0005524,GO:0005634,GO:0005737,GO:0005829,GO:0006412,GO:0006468,GO:0009615,GO:0009636,GO:0017148,GO:0022626,GO:0030968,GO:0032496,GO:0032722,GO:0032874,GO:0033197,GO:0033689,GO:0034198,GO:0035455,GO:0042802,GO:0043065,GO:0043066,GO:0045071,GO:0045087,GO:0046777,GO:0048471,GO:0051092,GO:0051607,GO:1900225,GO:1901224,GO:1901532,GO:…	activation of MAPKK activity|positive regulation of cytokine production|double-stranded RNA binding|protein kinase activity|eukaryotic translation initiation factor 2alpha kinase activity|non-membrane spanning protein tyrosine kinase activity|ATP binding|nucleus|cytoplasm|cytosol|translation|protein phosphorylation|response to virus|response to toxic substance|negative regulation of translation|c…	path:apla04141,path:apla04217,path:apla05164,path:apla05168	Protein processing in endoplasmic reticulum|Necroptosis|Influenza A|Herpes simplex infection
LOC110354195	47.1386	29.9102	64.3671	2.15201	1.10569	0.00225966	0.0113439	Up	0.237911	0.307447	0.158079	0.472334	0.627075	0.50508	GeneID:110354195	mesothelin-like protein	GO:0007160,GO:0009986,GO:0016021	cell-matrix adhesion|cell surface|integral component of membrane
LOC110354301	23.5698	1.62717	45.5125	27.9703	4.80583	6.01071e-16	1.75491e-14	Up	0.0864576	0	0.17494	3.64339	3.79716	2.51754	GeneID:110354301	C-C motif chemokine 3
LOC113839616	53.0668	3.26263	102.871	31.5302	4.97866	5.21049e-35	3.70201e-33	Up	0.601601	0	0.100062	8.36505	8.94361	6.81142	GeneID:113839616	oxysterol-binding protein 2-like
LOC113839799	42.8346	57.265	28.4041	0.496012	-1.01155	0.00168604	0.00884605	Down	5.31904	5.47312	4.42183	4.17009	1.94945	3.34561	GeneID:113839799	platelet-activating factor receptor-like	GO:0001530,GO:0001816,GO:0001875,GO:0004992,GO:0005543,GO:0005622,GO:0005886,GO:0006935,GO:0006954,GO:0016021,GO:0032959,GO:0048015	lipopolysaccharide binding|cytokine production|lipopolysaccharide receptor activity|platelet activating factor receptor activity|phospholipid binding|intracellular|plasma membrane|chemotaxis|inflammatory response|integral component of membrane|inositol trisphosphate biosynthetic process|phosphatidylinositol-mediated signaling
LOC113839921	27.4347	38.6375	16.232	0.42011	-1.25116	0.00742439	0.0308149	Down	0.34913	0.567012	0.299907	0.253847	0.129124	0.132228	GeneID:113839921	CMRF35-like molecule 1	GO:0001786,GO:0005886,GO:0007155,GO:0008429,GO:0016020,GO:0016021,GO:0030889,GO:0032516,GO:0033007,GO:0034125,GO:0038023,GO:0043305,GO:0043312,GO:0043407,GO:0048147,GO:0050776,GO:0050856,GO:0050859,GO:0051134,GO:0060101,GO:0070062,GO:0070821,GO:0101003,GO:1902564,GO:1902567,GO:1902569,GO:2000417	phosphatidylserine binding|plasma membrane|cell adhesion|phosphatidylethanolamine binding|membrane|integral component of membrane|negative regulation of B cell proliferation|positive regulation of phosphoprotein phosphatase activity|negative regulation of mast cell activation involved in immune response|negative regulation of MyD88-dependent toll-like receptor signaling pathway|signaling receptor…
LOC113840073	48.0116	68.3054	27.7179	0.405793	-1.30118	2.26291e-05	0.000191875	Down	9.19798	9.4127	8.38364	4.02786	1.32166	4.24418	GeneID:113840073	methyltransferase-like protein 27
LOC113840127	11.8371	17.8772	5.79713	0.324276	-1.62471	0.0102906	0.0403931	Down	0.0753286	0.0760144	0.0905389	0	0.0150504	0	GeneID:113840127	uncharacterized LOC113840127	GO:0005579,GO:0005615,GO:0006958,GO:0019835,GO:0043065,GO:0045087	membrane attack complex|extracellular space|complement activation, classical pathway|cytolysis|positive regulation of apoptotic process|innate immune response
LOC113840163	4.74419	0.32364	9.16475	28.3177	4.82363	0.000639414	0.00381199	Up	0	0	0	0.0400567	0.0258846	0.0266905	GeneID:113840163	interferon	GO:0005125,GO:0005126,GO:0005615,GO:0051607	cytokine activity|cytokine receptor binding|extracellular space|defense response to virus
LOC113840164	2.03957	0	4.07915	Inf	Inf	0.0324466	0.101756	Up	0	0	0	0.0284201	0.00409148	0	GeneID:113840164	interferon-like	GO:0005125,GO:0005126,GO:0005615,GO:0051607	cytokine activity|cytokine receptor binding|extracellular space|defense response to virus
LOC113840165	5.61507	0.32364	10.9065	33.6995	5.07465	0.000251812	0.00167137	Up	0	0	0	0	0.0123211	0	GeneID:113840165	interferon	GO:0005125,GO:0005126,GO:0005615,GO:0051607	cytokine activity|cytokine receptor binding|extracellular space|defense response to virus
LOC113840231	2103.67	1081.63	3125.72	2.88983	1.53098	8.63e-17	2.61493e-15	Up	96.2839	100.714	123.241	309.752	309.242	336.083	GeneID:113840231	avidin-like
LOC113840377	12.9995	18.2143	7.78475	0.427399	-1.22634	0.0402963	0.120405	Down	0.306046	0.130968	0.34901	0.0511677	0.0707062	0.199821	GeneID:113840377	transmembrane protein 271-like	GO:0016021	integral component of membrane
LOC113840493	2.76595	5.5319	0	0	#NAME?	0.00579765	0.0249528	Down	0.299643	0.0950346	0.182805	0	0	0	GeneID:113840493	cohesin subunit SA-3-like	GO:0000775,GO:0000795,GO:0005615,GO:0005634,GO:0007130,GO:0030893	chromosome, centromeric region|synaptonemal complex|extracellular space|nucleus|synaptonemal complex assembly|meiotic cohesin complex	path:apla04114	Oocyte meiosis
LOC113840914	52.7632	32.5152	73.0112	2.24545	1.167	5.56886e-05	0.000434395	Up	0.776819	0.649584	0.661748	1.06421	1.28657	1.38693	GeneID:113840914	echinoderm microtubule-associated protein-like 6	GO:0005737,GO:0005874,GO:0008017,GO:0015630	cytoplasm|microtubule|microtubule binding|microtubule cytoskeleton
LOC113840920	5.05822	8.43709	1.67936	0.199045	-2.32884	0.0286541	0.0924765	Down	0.105026	0.174209	0.0848569	0.054452	0	0.0212197	GeneID:113840920	protein O-GlcNAcase-like	GO:0004402,GO:0005634,GO:0005739,GO:0006044,GO:0006612,GO:0007568,GO:0009100,GO:0010524,GO:0010616,GO:0016231,GO:0031343,GO:0032024,GO:0043243,GO:0045862,GO:0046060,GO:0046326,GO:0048545,GO:0051054,GO:0051901,GO:0051928,GO:0060051,GO:0060124,GO:0070265,GO:0102166,GO:0102167,GO:0102571	histone acetyltransferase activity|nucleus|mitochondrion|N-acetylglucosamine metabolic process|protein targeting to membrane|aging|glycoprotein metabolic process|positive regulation of calcium ion transport into cytosol|negative regulation of cardiac muscle adaptation|beta-N-acetylglucosaminidase activity|positive regulation of cell killing|positive regulation of insulin secretion|positive regula…
LOC113840976	52.96	7.81429	98.1056	12.5546	3.65015	1.11866e-25	5.68114e-24	Up	0.0621017	0.042241	0.104663	1.12605	0.591232	0.752778	GeneID:113840976	GTPase IMAP family member 1-like	GO:0000139,GO:0005525,GO:0005783,GO:0005789,GO:0016021,GO:0030183,GO:0030217	Golgi membrane|GTP binding|endoplasmic reticulum|endoplasmic reticulum membrane|integral component of membrane|B cell differentiation|T cell differentiation
LOC113841015	14.0719	8.8035	19.3404	2.19689	1.13547	0.0448457	0.131359	Up	0.338738	0.119904	0.0729839	0.404952	0.304563	0.263396	GeneID:113841015	serine/threonine-protein kinase RIO2-like	GO:0004672,GO:0004674,GO:0005524,GO:0005634,GO:0005654,GO:0005737,GO:0005829,GO:0007049,GO:0030071,GO:0030490,GO:0030688,GO:0042274,GO:0046777,GO:0046872,GO:2000208,GO:2000234	protein kinase activity|protein serine/threonine kinase activity|ATP binding|nucleus|nucleoplasm|cytoplasm|cytosol|cell cycle|regulation of mitotic metaphase/anaphase transition|maturation of SSU-rRNA|preribosome, small subunit precursor|ribosomal small subunit biogenesis|protein autophosphorylation|metal ion binding|positive regulation of ribosomal small subunit export from nucleus|positive regu…	path:apla03008	Ribosome biogenesis in eukaryotes
LOC113841028	281.692	394.825	168.558	0.426919	-1.22797	0.000739476	0.00432852	Down	12.1308	13.2029	12.9679	6.72315	8.35963	1.08996	GeneID:113841028	ATP synthase subunit alpha, mitochondrial	GO:0005524,GO:0005753,GO:0005886,GO:0015986,GO:0045261,GO:0046933	ATP binding|mitochondrial proton-transporting ATP synthase complex|plasma membrane|ATP synthesis coupled proton transport|proton-transporting ATP synthase complex, catalytic core F(1)|proton-transporting ATP synthase activity, rotational mechanism	path:apla00190	Oxidative phosphorylation
LOC113841552	5.86875	10.7281	1.0094	0.0940894	-3.40982	0.00488623	0.0216245	Down	0.39992	0.667511	0.150972	0	0	0.101409	GeneID:113841552	uncharacterized LOC113841552
LOC113841577	21.0353	29.8391	12.2315	0.409917	-1.2866	0.00828472	0.0337353	Down	1.19305	3.49639	3.89699	1.17606	1.15442	0.891342	GeneID:113841577	keratin, type I cytoskeletal 18-like
LOC113841944	5.73351	10.1019	1.36517	0.13514	-2.88747	0.00516592	0.0226882	Down	2.27057	1.25936	1.03631	0.209975	0.29302	0.142591	GeneID:113841944	B9 domain-containing protein 2-like	GO:0005634,GO:0005737,GO:0005813,GO:0016020,GO:0035869,GO:0036038,GO:0036064,GO:0043015,GO:0060271	nucleus|cytoplasm|centrosome|membrane|ciliary transition zone|MKS complex|ciliary basal body|gamma-tubulin binding|cilium assembly
LOC113841983	7.58429	2.26411	12.9045	5.69959	2.51086	0.00325591	0.0153967	Up	0	0.103407	0.102192	0.385013	0.305549	0.415488	GeneID:113841983	uncharacterized LOC113841983
LOC113842133	1516.19	755.974	2276.4	3.01121	1.59034	7.21714e-46	6.42548e-44	Up	4.25053	4.39592	3.91665	11.1706	12.4593	11.216	GeneID:113842133	E3 SUMO-protein ligase RanBP2-like	GO:0001975,GO:0003723,GO:0003755,GO:0005634,GO:0005635,GO:0005642,GO:0005643,GO:0005737,GO:0005739,GO:0005813,GO:0006111,GO:0006457,GO:0006607,GO:0008536,GO:0016925,GO:0019789,GO:0031965,GO:0033133,GO:0042405,GO:0043547,GO:0044614,GO:0044615,GO:0044877,GO:0046872,GO:0051028,GO:0051642,GO:1990723	response to amphetamine|RNA binding|peptidyl-prolyl cis-trans isomerase activity|nucleus|nuclear envelope|annulate lamellae|nuclear pore|cytoplasm|mitochondrion|centrosome|regulation of gluconeogenesis|protein folding|NLS-bearing protein import into nucleus|Ran GTPase binding|protein sumoylation|SUMO transferase activity|nuclear membrane|positive regulation of glucokinase activity|nuclear inclusi…	path:apla03013	RNA transport
LOC113842145	2.02177	0	4.04353	Inf	Inf	0.0326965	0.102451	Up	0	0	0	0	0.0223378	0.157686	GeneID:113842145	cadherin-17-like
LOC113842279	26.3757	41.593	11.1583	0.268274	-1.89822	8.65951e-06	8.14717e-05	Down	2.05723	2.0998	1.94249	0.189136	0.0752784	0.943609	GeneID:113842279	protein YIF1B-like
LOC113842551	54.3504	33.7846	74.9163	2.21747	1.14892	0.000575012	0.0034715	Up	1.19866	1.36928	1.28896	2.38269	3.28016	2.14588	GeneID:113842551	class E basic helix-loop-helix protein 22	GO:0000981,GO:0005634,GO:0022008,GO:0046983	DNA-binding transcription factor activity, RNA polymerase II-specific|nucleus|neurogenesis|protein dimerization activity
LOC113842862	3.09352	0	6.18705	Inf	Inf	0.0394709	0.118454	Up	0	0	0	0.0531632	0.248758	0.0424309	GeneID:113842862	lipoxygenase homology domain-containing protein 1-like	GO:0004096,GO:0007605,GO:0020037,GO:0032420	catalase activity|sensory perception of sound|heme binding|stereocilium
LOC113842870	15.752	7.13147	24.3725	3.41759	1.77298	0.00168703	0.008848	Up	0.0645193	0.132169	0.283906	0.742051	0.381522	0.390502	GeneID:113842870	class E basic helix-loop-helix protein 22-like	GO:0000981,GO:0005634,GO:0022008,GO:0046983	DNA-binding transcription factor activity, RNA polymerase II-specific|nucleus|neurogenesis|protein dimerization activity
LOC113842963	186.91	20.1419	353.678	17.5593	4.13416	4.04873e-93	7.58375e-91	Up	0.0770129	0.103501	0.193179	2.95968	2.60255	2.10678	GeneID:113842963	uncharacterized LOC113842963	GO:0005525,GO:0005739,GO:0005783,GO:0005794,GO:0005829,GO:0070232	GTP binding|mitochondrion|endoplasmic reticulum|Golgi apparatus|cytosol|regulation of T cell apoptotic process
LOC113842971	201.427	79.6263	323.228	4.05932	2.02124	8.15768e-36	6.06486e-34	Up	2.54429	2.65981	2.50106	10.9444	9.77298	8.92646	GeneID:113842971	GTPase IMAP family member 1-like	GO:0000139,GO:0005525,GO:0005783,GO:0005789,GO:0016021,GO:0030183,GO:0030217	Golgi membrane|GTP binding|endoplasmic reticulum|endoplasmic reticulum membrane|integral component of membrane|B cell differentiation|T cell differentiation
LOC113842972	4.21574	0.328125	8.10335	24.6959	4.6262	0.0236812	0.0792285	Up	0.0391709	0	0	0.642202	0.19439	0.116095	GeneID:113842972	GTPase IMAP family member 7-like	GO:0003924,GO:0005525,GO:0005783,GO:0005794,GO:0005811,GO:0005829,GO:0042802,GO:0042803,GO:0043231,GO:0046039	GTPase activity|GTP binding|endoplasmic reticulum|Golgi apparatus|lipid droplet|cytosol|identical protein binding|protein homodimerization activity|intracellular membrane-bounded organelle|GTP metabolic process
LOC113843303	86.8527	56.2682	117.437	2.08709	1.0615	2.74839e-06	2.83955e-05	Up	1.03197	0.840013	0.869362	1.5964	1.86694	1.78683	GeneID:113843303	plectin-like	GO:0003779,GO:0005198,GO:0005200,GO:0005737,GO:0005829,GO:0005903,GO:0005925,GO:0007584,GO:0008092,GO:0008307,GO:0009925,GO:0016020,GO:0016324,GO:0016528,GO:0030056,GO:0030506,GO:0031581,GO:0042060,GO:0042383,GO:0043292,GO:0045104,GO:0045111,GO:0047485,GO:0048471	actin binding|structural molecule activity|structural constituent of cytoskeleton|cytoplasm|cytosol|brush border|focal adhesion|response to nutrient|cytoskeletal protein binding|structural constituent of muscle|basal plasma membrane|membrane|apical plasma membrane|sarcoplasm|hemidesmosome|ankyrin binding|hemidesmosome assembly|wound healing|sarcolemma|contractile fiber|intermediate filament cytos…
LOC113843304	64.466	33.1476	95.7844	2.88963	1.53089	0.000773367	0.00449226	Up	0.460707	0.552014	0.456918	1.29376	1.29282	0.684179	GeneID:113843304	plectin-like
LOC113843368	5.46002	0.323297	10.5967	32.7771	5.03462	0.000546126	0.00332073	Up	0	0.0403902	0	0.260203	0.47612	0.19952	GeneID:113843368	nuclear GTPase SLIP-GC-like	GO:0003924,GO:0005525,GO:0016607,GO:0033262,GO:0043066,GO:0071222,GO:0097752	GTPase activity|GTP binding|nuclear speck|regulation of nuclear cell cycle DNA replication|negative regulation of apoptotic process|cellular response to lipopolysaccharide|regulation of DNA stability
LOC113843492	60.2161	27.3059	93.1264	3.41049	1.76998	2.17167e-10	3.97992e-09	Up	1.02363	0.894517	0.776386	2.85446	2.13737	3.31381	GeneID:113843492	homeobox protein Nkx-6.1-like	GO:0000122,GO:0000978,GO:0000981,GO:0001078,GO:0001764,GO:0003682,GO:0005634,GO:0006366,GO:0007224,GO:0009887,GO:0021912,GO:0021913,GO:0030516,GO:0031016,GO:0032024,GO:0035094,GO:0044342,GO:0045666,GO:0045686,GO:0045687,GO:0045944,GO:0048709,GO:0051091,GO:0051594,GO:0070062,GO:0071345,GO:0071375,GO:0072560,GO:2000078,GO:2001222	negative regulation of transcription by RNA polymerase II|RNA polymerase II proximal promoter sequence-specific DNA binding|DNA-binding transcription factor activity, RNA polymerase II-specific|proximal promoter DNA-binding transcription repressor activity, RNA polymerase II-specific|neuron migration|chromatin binding|nucleus|transcription by RNA polymerase II|smoothened signaling pathway|animal …
LOC113843498	3868.23	917.867	6818.6	7.42874	2.89312	2.30142e-71	2.9637e-69	Up	13.5423	11.9177	11.9367	85.2101	94.7899	81.9737	GeneID:113843498	OTU domain-containing protein 4-like
LOC113843588	4.11332	0	8.22664	Inf	Inf	0.00547637	0.0237909	Up	0	0	0	0	0.0727263	0.0713435	GeneID:113843588	placenta-specific gene 8 protein-like	GO:0003682,GO:0005576,GO:0008284,GO:0009409,GO:0035578,GO:0040015,GO:0042742,GO:0043066,GO:0043312,GO:0045944,GO:0050873,GO:0120162	chromatin binding|extracellular region|positive regulation of cell proliferation|response to cold|azurophil granule lumen|negative regulation of multicellular organism growth|defense response to bacterium|negative regulation of apoptotic process|neutrophil degranulation|positive regulation of transcription by RNA polymerase II|brown fat cell differentiation|positive regulation of cold-induced the…
LOC113843692	8312.23	2699.57	13924.9	5.15819	2.36687	5.99944e-34	4.12047e-32	Up	382.656	393.662	393.033	2432.17	1837.9	2239.48	GeneID:113843692	dispanin subfamily A member 2b-like	GO:0005886,GO:0016021	plasma membrane|integral component of membrane
LOC113843742	25.8555	36.7863	14.9247	0.405714	-1.30146	0.00184547	0.00954023	Down	1.15517	0.688494	0.650414	0.500249	0.312075	0.274936	GeneID:113843742	spectrin beta chain, erythrocytic-like	GO:0000165,GO:0003779,GO:0005088,GO:0005200,GO:0005794,GO:0005829,GO:0006888,GO:0007411,GO:0008091,GO:0009986,GO:0014731,GO:0015629,GO:0030506,GO:0031235,GO:0032991,GO:0051015,GO:0051693	MAPK cascade|actin binding|Ras guanyl-nucleotide exchange factor activity|structural constituent of cytoskeleton|Golgi apparatus|cytosol|ER to Golgi vesicle-mediated transport|axon guidance|spectrin|cell surface|spectrin-associated cytoskeleton|actin cytoskeleton|ankyrin binding|intrinsic component of the cytoplasmic side of the plasma membrane|protein-containing complex|actin filament binding|ac…
LOC113843795	23.5055	35.0788	11.9322	0.340155	-1.55573	0.0176355	0.0625415	Down	2.17477	4.25661	1.29517	0	0.545532	1.46262	GeneID:113843795	activator of 90 kDa heat shock protein ATPase homolog 1-like	GO:0001671,GO:0005783,GO:0005829,GO:0032781,GO:0045296,GO:0051087,GO:0051879,GO:0070062	ATPase activator activity|endoplasmic reticulum|cytosol|positive regulation of ATPase activity|cadherin binding|chaperone binding|Hsp90 protein binding|extracellular exosome
LOC113843797	16.6335	23.0558	10.2113	0.442895	-1.17496	0.0237176	0.0793207	Down	0.411976	0.483005	0.606968	0.116165	0.254061	0.255635	GeneID:113843797	translation initiation factor IF-2-like	GO:0004725,GO:0005634,GO:0005737,GO:0017017	protein tyrosine phosphatase activity|nucleus|cytoplasm|MAP kinase tyrosine/serine/threonine phosphatase activity
LOC113843891	5.61478	0	11.2296	Inf	Inf	1.51865e-05	0.000133966	Up	0	0	0	0.363401	0.359415	0.103846	GeneID:113843891	proto-oncogene Mas-like	GO:0004930,GO:0005886,GO:0007186,GO:0016021	G protein-coupled receptor activity|plasma membrane|G protein-coupled receptor signaling pathway|integral component of membrane
LOC113843999	10.5168	15.6144	5.41909	0.347056	-1.52676	0.0239263	0.0798778	Down	0.237511	0.322491	0.0798733	0	0	0.159578	GeneID:113843999	uncharacterized LOC113843999	GO:0000209,GO:0004842,GO:0005741,GO:0005783,GO:0005789,GO:0008270,GO:0016021,GO:0051020,GO:0051865,GO:0070585,GO:0090140,GO:0090141,GO:0090344	protein polyubiquitination|ubiquitin-protein transferase activity|mitochondrial outer membrane|endoplasmic reticulum|endoplasmic reticulum membrane|zinc ion binding|integral component of membrane|GTPase binding|protein autoubiquitination|protein localization to mitochondrion|regulation of mitochondrial fission|positive regulation of mitochondrial fission|negative regulation of cell aging
LOC113844165	13.7538	21.4438	6.06379	0.282777	-1.82227	0.00222458	0.0112029	Down	0.387523	0.349563	0.540724	0.17155	0.0394749	0.135636	GeneID:113844165	transcription factor 15-like	GO:0003677,GO:0005634,GO:0007275,GO:0046983	DNA binding|nucleus|multicellular organism development|protein dimerization activity
LOC113844187	5.043	0.970233	9.11576	9.39543	3.23196	0.0150291	0.0549329	Up	0	0.0178133	0.00902834	0.0313016	0.0358689	0.144989	GeneID:113844187	sodium channel protein type 1 subunit alpha-like	GO:0001508,GO:0001518,GO:0005244,GO:0005248,GO:0005654,GO:0005886,GO:0006814,GO:0007628,GO:0014704,GO:0016020,GO:0016604,GO:0019227,GO:0019228,GO:0030018,GO:0030315,GO:0030424,GO:0031402,GO:0033268,GO:0034706,GO:0034765,GO:0035725,GO:0042391,GO:0043025,GO:0043194,GO:0050884,GO:0050966,GO:0086002,GO:0086010,GO:0099056	action potential|voltage-gated sodium channel complex|voltage-gated ion channel activity|voltage-gated sodium channel activity|nucleoplasm|plasma membrane|sodium ion transport|adult walking behavior|intercalated disc|membrane|nuclear body|neuronal action potential propagation|neuronal action potential|Z disc|T-tubule|axon|sodium ion binding|node of Ranvier|sodium channel complex|regulation of ion…
LOC113844756	3.25748	6.1785	0.336467	0.0544578	-4.19872	0.0113686	0.0438991	Down	0.104074	0.105698	0.156351	0	0	0.0518862	GeneID:113844756	serine protease 23-like	GO:0004252,GO:0005576,GO:0005634	serine-type endopeptidase activity|extracellular region|nucleus
LOC113845022	28.4863	39.2833	17.6893	0.450299	-1.15104	0.00340667	0.0159839	Down	2.08969	4.94542	4.4569	1.24356	1.98801	1.86272	GeneID:113845022	cytochrome b561 domain-containing protein 2	GO:0004322,GO:0005783,GO:0016021,GO:0020037,GO:0031982,GO:0046872	ferroxidase activity|endoplasmic reticulum|integral component of membrane|heme binding|vesicle|metal ion binding
LOC113845228	167.964	103.598	232.33	2.24262	1.16518	7.60833e-06	7.23368e-05	Up	1.18345	1.81135	2.23149	2.78907	3.73411	2.9836	GeneID:113845228	bifunctional apoptosis regulator-like	GO:0000209,GO:0005783,GO:0005789,GO:0006511,GO:0006915,GO:0016020,GO:0016021,GO:0030674,GO:0043066,GO:0043161,GO:0046872,GO:0051865,GO:0061630,GO:0070534,GO:0070936,GO:0089720,GO:1903895	protein polyubiquitination|endoplasmic reticulum|endoplasmic reticulum membrane|ubiquitin-dependent protein catabolic process|apoptotic process|membrane|integral component of membrane|protein binding, bridging|negative regulation of apoptotic process|proteasome-mediated ubiquitin-dependent protein catabolic process|metal ion binding|protein autoubiquitination|ubiquitin protein ligase activity|pro…
LOC113845377	2171.2	798.226	3544.18	4.44007	2.15058	1.09245e-38	8.61008e-37	Up	17.3425	18.9051	16.9956	77.7683	76.5064	70.836	GeneID:113845377	C-type lectin domain family 2 member B-like
LOC113845381	838.419	376.756	1300.08	3.45072	1.7869	1.84336e-26	9.63288e-25	Up	7.2655	7.3402	6.57096	28.3489	17.4928	24.3822	GeneID:113845381	C-type lectin domain family 2 member B-like	GO:0005886,GO:0016021,GO:0030246	plasma membrane|integral component of membrane|carbohydrate binding
LOC113845386	3.37058	0	6.74116	Inf	Inf	0.00859647	0.0347985	Up	0	0	0	0	0	0	GeneID:113845386	butyrophilin subfamily 3 member A1-like	GO:0005102,GO:0005615,GO:0005886,GO:0005887,GO:0009897,GO:0038023,GO:0050776,GO:0050852	signaling receptor binding|extracellular space|plasma membrane|integral component of plasma membrane|external side of plasma membrane|signaling receptor activity|regulation of immune response|T cell receptor signaling pathway
LOC113845388	6.04368	2.27791	9.80945	4.30635	2.10646	0.0243449	0.0810168	Up	0	0	0	0	0	0	GeneID:113845388	C-type lectin domain family 2 member B-like	GO:0005886,GO:0016021,GO:0030246	plasma membrane|integral component of membrane|carbohydrate binding
LOC113845392	8.51262	1.29836	15.7269	12.1129	3.59847	0.00243795	0.0121052	Up	0.026839	0.0271912	0.0268422	0.118882	0.551104	0.317083	GeneID:113845392	butyrophilin subfamily 1 member A1-like	GO:0005102,GO:0009897,GO:0016021,GO:0050776,GO:0050852	signaling receptor binding|external side of plasma membrane|integral component of membrane|regulation of immune response|T cell receptor signaling pathway
LOC113845674	734.936	489.848	980.024	2.00067	1.00048	7.42444e-13	1.70514e-11	Up	31.059	28.0885	33.984	78.3006	57.1278	66.8697	GeneID:113845674	complement factor D-like	GO:0004252,GO:0005576,GO:0006957	serine-type endopeptidase activity|extracellular region|complement activation, alternative pathway
LOC113845682	17.7237	4.55133	30.896	6.78835	2.76306	6.31452e-07	7.33879e-06	Up	0.0299428	0.0456239	0.0150024	0.181648	0.179819	0.204204	GeneID:113845682	tripartite motif-containing protein 15-like	GO:0000122,GO:0001650,GO:0002820,GO:0003677,GO:0004842,GO:0005634,GO:0005654,GO:0005730,GO:0005737,GO:0005768,GO:0005829,GO:0006469,GO:0008270,GO:0016605,GO:0019789,GO:0030904,GO:0031965,GO:0032720,GO:0032897,GO:0034314,GO:0042147,GO:0042802,GO:0045087,GO:0045814,GO:0051091,GO:0051127,GO:0061630,GO:0070206,GO:0070534,GO:0072643,GO:0090281,GO:1900041,GO:1902187	negative regulation of transcription by RNA polymerase II|fibrillar center|negative regulation of adaptive immune response|DNA binding|ubiquitin-protein transferase activity|nucleus|nucleoplasm|nucleolus|cytoplasm|endosome|cytosol|negative regulation of protein kinase activity|zinc ion binding|PML body|SUMO transferase activity|retromer complex|nuclear membrane|negative regulation of tumor necros…
LOC113845762	115.55	58.4734	172.626	2.95222	1.5618	1.68984e-08	2.49463e-07	Up	1.65256	2.20517	2.33281	6.34787	4.78546	5.89309	GeneID:113845762	neuritin-like	GO:0005886,GO:0007399,GO:0030054,GO:0031225,GO:0045202	plasma membrane|nervous system development|cell junction|anchored component of membrane|synapse
LPL	994.826	1340.81	648.841	0.483917	-1.04717	1.03992e-34	7.31645e-33	Down	17.6392	17.2772	16.8061	8.20397	6.94791	8.18476	GeneID:101796218	lipoprotein lipase	GO:0004465,GO:0005102,GO:0005615,GO:0005886,GO:0006633,GO:0008201,GO:0009617,GO:0009986,GO:0010744,GO:0010886,GO:0010890,GO:0019432,GO:0019433,GO:0031225,GO:0034185,GO:0034361,GO:0034372,GO:0042627,GO:0042632,GO:0055096,GO:0070328,GO:0090197	lipoprotein lipase activity|signaling receptor binding|extracellular space|plasma membrane|fatty acid biosynthetic process|heparin binding|response to bacterium|cell surface|positive regulation of macrophage derived foam cell differentiation|positive regulation of cholesterol storage|positive regulation of sequestering of triglyceride|triglyceride biosynthetic process|triglyceride catabolic proce…	path:apla00561,path:apla03320	Glycerolipid metabolism|PPAR signaling pathway
LRP3	350.092	187.409	512.776	2.73613	1.45214	1.50101e-31	9.41265e-30	Up	1.37496	1.84275	1.61012	4.09646	4.38182	3.97634	GeneID:101803310	LDL receptor related protein 3	GO:0005905,GO:0006898,GO:0016021	clathrin-coated pit|receptor-mediated endocytosis|integral component of membrane
LRRC32	1568.47	978.521	2158.41	2.20579	1.14129	2.20573e-51	2.20926e-49	Up	8.29241	8.79249	7.97662	18.5671	17.9274	17.6465	GeneID:101796895	leucine rich repeat containing 32	GO:0005615,GO:0005654,GO:0005886,GO:0007179,GO:0009986,GO:0010628,GO:0016021,GO:0031012,GO:0046007,GO:0050431,GO:0050710,GO:0062009,GO:1901398	extracellular space|nucleoplasm|plasma membrane|transforming growth factor beta receptor signaling pathway|cell surface|positive regulation of gene expression|integral component of membrane|extracellular matrix|negative regulation of activated T cell proliferation|transforming growth factor beta binding|negative regulation of cytokine secretion|secondary palate development|regulation of transform…
LRRC36	16.2653	24.4273	8.10338	0.331735	-1.5919	0.00533381	0.0232872	Down	0.696287	0.400732	0.357185	0.196025	0.0685024	0.250657	GeneID:101790403	leucine rich repeat containing 36
LRRC38	148.305	98.7124	197.898	2.00479	1.00345	1.3055e-08	1.95121e-07	Up	0.980165	1.12175	1.05865	1.97576	1.99083	1.84259	GeneID:101795535	leucine rich repeat containing 38	GO:0005249,GO:0005887,GO:0008076,GO:0044325,GO:0071805,GO:0099104,GO:1903818	voltage-gated potassium channel activity|integral component of plasma membrane|voltage-gated potassium channel complex|ion channel binding|potassium ion transmembrane transport|potassium channel activator activity|positive regulation of voltage-gated potassium channel activity
LRRC9	5.39476	1.2987	9.49082	7.30793	2.86946	0.00678452	0.0285037	Up	0.00864751	0.00844607	0.0170997	0.0149606	0.0258006	0.0776486	GeneID:101801740	leucine rich repeat containing 9
LVRN	334.51	465.021	203.998	0.438687	-1.18874	2.5579e-21	1.02765e-19	Down	6.64516	6.47323	6.61684	2.79639	2.18741	2.82145	GeneID:101796233	laeverin	GO:0005737,GO:0005886,GO:0006508,GO:0008270,GO:0016021,GO:0042277,GO:0043171,GO:0070006	cytoplasm|plasma membrane|proteolysis|zinc ion binding|integral component of membrane|peptide binding|peptide catabolic process|metalloaminopeptidase activity
LY86	18.6078	25.3399	11.8758	0.46866	-1.09339	0.0259062	0.08521	Down	0.73808	0.640309	0.865717	0.308766	0.320923	0.452568	GeneID:101800607	lymphocyte antigen 86	GO:0005615,GO:0006954,GO:0045087	extracellular space|inflammatory response|innate immune response
LYRM9	345.049	203.416	486.682	2.39255	1.25855	2.81925e-24	1.32882e-22	Up	5.57018	5.72296	8.36699	17.1037	16.0806	17.421	GeneID:101803631	LYR motif containing 9
MAP3K6	50.377	17.2499	83.504	4.84084	2.27526	5.22713e-13	1.2219e-11	Up	0.222568	0.19392	0.137305	1.16867	0.966549	1.01726	GeneID:101803181	mitogen-activated protein kinase kinase kinase 6	GO:0000186,GO:0000287,GO:0004672,GO:0004709,GO:0005524,GO:0005622,GO:0006468,GO:0007165,GO:0007257	activation of MAPKK activity|magnesium ion binding|protein kinase activity|MAP kinase kinase kinase activity|ATP binding|intracellular|protein phosphorylation|signal transduction|activation of JUN kinase activity	path:apla04010	MAPK signaling pathway
MAP3K8	1039.74	506.918	1572.57	3.10222	1.6333	1.12054e-80	1.70122e-78	Up	6.9982	7.74859	7.44228	22.0749	21.3687	22.362	GeneID:101791769	mitogen-activated protein kinase kinase kinase 8			path:apla04010,path:apla04620	MAPK signaling pathway|Toll-like receptor signaling pathway
MAPKAPK3	177.21	115.112	239.308	2.07892	1.05583	8.28942e-11	1.59837e-09	Up	1.46012	1.29766	1.28341	2.77854	2.35329	2.63519	GeneID:101801666	mitogen-activated protein kinase-activated protein kinase 3	GO:0000187,GO:0002224,GO:0004674,GO:0004683,GO:0004708,GO:0005524,GO:0005634,GO:0005654,GO:0005737,GO:0005829,GO:0007165,GO:0009931,GO:0018105,GO:0032496,GO:0034097,GO:0035556,GO:0044351,GO:0048010,GO:0051019	activation of MAPK activity|toll-like receptor signaling pathway|protein serine/threonine kinase activity|calmodulin-dependent protein kinase activity|MAP kinase kinase activity|ATP binding|nucleus|nucleoplasm|cytoplasm|cytosol|signal transduction|calcium-dependent protein serine/threonine kinase activity|peptidyl-serine phosphorylation|response to lipopolysaccharide|response to cytokine|intracel…	path:apla04010,path:apla04370	MAPK signaling pathway|VEGF signaling pathway
MC2R	6.09219	0.646593	11.5378	17.844	4.15737	0.00196743	0.0100732	Up	0	0.0589415	0	0.46869	0.270713	0.120477	GeneID:101799179	melanocortin 2 receptor	GO:0001890,GO:0004978,GO:0005737,GO:0005886,GO:0007189,GO:0016021	placenta development|corticotropin receptor activity|cytoplasm|plasma membrane|adenylate cyclase-activating G protein-coupled receptor signaling pathway|integral component of membrane	path:apla04080	Neuroactive ligand-receptor interaction
MCF2L	358.28	231.625	484.935	2.09362	1.066	1.34212e-18	4.67568e-17	Up	1.2278	1.50152	1.36631	2.33069	2.59465	2.86208	GeneID:101805163	MCF.2 cell line derived transforming sequence like	GO:0005089,GO:0005737,GO:0005886,GO:0008289,GO:0019898,GO:0035025,GO:0035556	Rho guanyl-nucleotide exchange factor activity|cytoplasm|plasma membrane|lipid binding|extrinsic component of membrane|positive regulation of Rho protein signal transduction|intracellular signal transduction
MCTP1	99.671	60.7937	138.548	2.27899	1.1884	2.29322e-08	3.31602e-07	Up	0.579939	0.442457	0.532662	1.13475	0.654397	1.12796	GeneID:101797768	multiple C2 and transmembrane domain containing 1	GO:0005509,GO:0005789,GO:0016021,GO:0030054,GO:0030336,GO:0030672,GO:0045806,GO:0055037,GO:1902883	calcium ion binding|endoplasmic reticulum membrane|integral component of membrane|cell junction|negative regulation of cell migration|synaptic vesicle membrane|negative regulation of endocytosis|recycling endosome|negative regulation of response to oxidative stress
MEF2B	10.1315	16.9118	3.35127	0.198162	-2.33525	0.00130723	0.0071121	Down	0.450964	0.414282	0.248967	0.285141	0	0	GeneID:113845645	myocyte enhancer factor 2B	GO:0000790,GO:0000978,GO:0000981,GO:0001077,GO:0001205,GO:0003700,GO:0005634,GO:0005667,GO:0007517,GO:0042826,GO:0045944,GO:0046983	nuclear chromatin|RNA polymerase II proximal promoter sequence-specific DNA binding|DNA-binding transcription factor activity, RNA polymerase II-specific|proximal promoter DNA-binding transcription activator activity, RNA polymerase II-specific|distal enhancer DNA-binding transcription activator activity, RNA polymerase II-specific|DNA-binding transcription factor activity|nucleus|transcription f…	path:apla04371	Apelin signaling pathway
METTL4	181.747	109.779	253.715	2.31115	1.20861	9.66035e-14	2.40226e-12	Up	1.62644	2.40391	1.68129	4.03915	4.36481	3.98516	GeneID:101796657	methyltransferase like 4	GO:0003676,GO:0005634,GO:0009007	nucleic acid binding|nucleus|site-specific DNA-methyltransferase (adenine-specific) activity
MFNG	9.31325	15.2663	3.3602	0.220106	-2.18373	0.0150288	0.0549329	Down	0.115171	0.0874166	0.230345	0.0314824	0	0.0481239	GeneID:101790022	MFNG O-fucosylpeptide 3-beta-N-acetylglucosaminyltransferase			path:apla00514,path:apla04330	Other types of O-glycan biosynthesis|Notch signaling pathway
MFSD14B	890.404	396.207	1384.6	3.49464	1.80515	6.6201e-68	7.89106e-66	Up	9.43413	9.05206	9.96347	30.9491	32.3146	29.2346	GeneID:101791918	major facilitator superfamily domain containing 14B	GO:0005215,GO:0016021,GO:0055085	transporter activity|integral component of membrane|transmembrane transport
MGP	34.6782	50.4179	18.9386	0.375632	-1.41261	0.00020859	0.00141777	Down	2.84543	2.535	1.67227	1.21906	0.541118	0.662845	GeneID:101804899	matrix Gla protein	GO:0001503,GO:0005509,GO:0030154,GO:0051216,GO:0062023	ossification|calcium ion binding|cell differentiation|cartilage development|collagen-containing extracellular matrix
MGST2	18.0459	6.51628	29.5754	4.5387	2.18228	3.19838e-05	0.000263601	Up	1.36816	0.466247	0.464903	2.47671	4.50958	3.98387	GeneID:101798388	microsomal glutathione S-transferase 2			path:apla00480,path:apla00980,path:apla00982,path:apla00983	Glutathione metabolism|Metabolism of xenobiotics by cytochrome P450|Drug metabolism - cytochrome P450|Drug metabolism - other enzymes
MITD1	2490.72	396.097	4585.35	11.5763	3.53311	0	0	Up	10.7627	11.5546	11.6753	122.576	127.164	125.388	GeneID:101797635	microtubule interacting and trafficking domain containing 1	GO:0019898,GO:0019904,GO:0030496,GO:0031902,GO:0032091,GO:0035091,GO:0042803,GO:0043231,GO:0061952	extrinsic component of membrane|protein domain specific binding|midbody|late endosome membrane|negative regulation of protein binding|phosphatidylinositol binding|protein homodimerization activity|intracellular membrane-bounded organelle|midbody abscission
MIXL1	4.07062	1.30353	6.83771	5.24553	2.39109	0.0476311	0.137727	Up	0.0228453	0	0.0115017	0.0527334	0.0791002	0.0580466	GeneID:113843121	Mix paired-like homeobox	GO:0005634,GO:0006355,GO:0007275,GO:0030154,GO:0043565	nucleus|regulation of transcription, DNA-templated|multicellular organism development|cell differentiation|sequence-specific DNA binding
MKNK1	284.922	171.567	398.276	2.3214	1.21499	1.0132e-19	3.75664e-18	Up	1.61808	2.01648	1.76706	4.01059	4.54537	4.44555	GeneID:101794448	MAP kinase interacting serine/threonine kinase 1	GO:0004674,GO:0004683,GO:0005524,GO:0005634,GO:0005654,GO:0005737,GO:0006446,GO:0006468,GO:0009651,GO:0009931,GO:0018105,GO:0035556,GO:0046872,GO:0097192	protein serine/threonine kinase activity|calmodulin-dependent protein kinase activity|ATP binding|nucleus|nucleoplasm|cytoplasm|regulation of translational initiation|protein phosphorylation|response to salt stress|calcium-dependent protein serine/threonine kinase activity|peptidyl-serine phosphorylation|intracellular signal transduction|metal ion binding|extrinsic apoptotic signaling pathway in …	path:apla04010,path:apla04910	MAPK signaling pathway|Insulin signaling pathway
MMP11	256.438	365.261	147.616	0.404138	-1.30708	1.32182e-20	5.15258e-19	Down	10.3151	11.2105	10.411	4.3615	4.20064	5.13259	GeneID:101803448	matrix metallopeptidase 11	GO:0004222,GO:0007275,GO:0008270,GO:0030574,GO:0031012	metalloendopeptidase activity|multicellular organism development|zinc ion binding|collagen catabolic process|extracellular matrix
MMRN2	109.951	67.5519	152.35	2.2553	1.17332	8.316e-09	1.28006e-07	Up	0.285206	0.426549	0.30842	0.609362	0.676145	0.723711	GeneID:101798214	multimerin 2	GO:0002042,GO:0005201,GO:0005604,GO:0005615,GO:0010811,GO:0030948,GO:0031012,GO:0062023,GO:0070062,GO:0090051	cell migration involved in sprouting angiogenesis|extracellular matrix structural constituent|basement membrane|extracellular space|positive regulation of cell-substrate adhesion|negative regulation of vascular endothelial growth factor receptor signaling pathway|extracellular matrix|collagen-containing extracellular matrix|extracellular exosome|negative regulation of cell migration involved in s…
MOV10	2538.4	215.447	4861.35	22.5641	4.49596	9.35197e-242	3.37209e-239	Up	3.14548	3.14377	3.51282	82.2465	67.1621	75.1719	GeneID:101801059	Mov10 RISC complex RNA helicase	GO:0000932,GO:0003723,GO:0005524,GO:0005634,GO:0005829,GO:0010526,GO:0032575,GO:0035194,GO:0035195,GO:0035279,GO:0036464,GO:0043186,GO:0061014,GO:0061158,GO:0150011	P-body|RNA binding|ATP binding|nucleus|cytosol|negative regulation of transposition, RNA-mediated|ATP-dependent 5'-3' RNA helicase activity|posttranscriptional gene silencing by RNA|gene silencing by miRNA|mRNA cleavage involved in gene silencing by miRNA|cytoplasmic ribonucleoprotein granule|P granule|positive regulation of mRNA catabolic process|3'-UTR-mediated mRNA destabilization|regulation o…
MRPL30	492.871	286.826	698.916	2.43673	1.28495	6.59181e-18	2.17526e-16	Up	21.7874	25.711	30.7092	61.0345	60.7507	72.451	GeneID:101789893	mitochondrial ribosomal protein L30	GO:0003735,GO:0005762,GO:0006412	structural constituent of ribosome|mitochondrial large ribosomal subunit|translation	path:apla03010	Ribosome
MYBPC1	32.3878	44.7742	20.0014	0.446717	-1.16257	0.00354158	0.0164775	Down	0.220084	0.37594	0.405588	0.139963	0.140989	0.126443	GeneID:101803053	myosin binding protein C, slow type	GO:0005829,GO:0005865,GO:0006936,GO:0007155,GO:0008307,GO:0030016,GO:0030017,GO:0030018,GO:0030049,GO:0030240,GO:0030241,GO:0031430,GO:0031432,GO:0032982,GO:0045214,GO:0048739,GO:0051015,GO:0051371,GO:0055003,GO:0055008	cytosol|striated muscle thin filament|muscle contraction|cell adhesion|structural constituent of muscle|myofibril|sarcomere|Z disc|muscle filament sliding|skeletal muscle thin filament assembly|skeletal muscle myosin thick filament assembly|M band|titin binding|myosin filament|sarcomere organization|cardiac muscle fiber development|actin filament binding|muscle alpha-actinin binding|cardiac myofi…
MYH7B	37.4257	57.2157	17.6358	0.308233	-1.69791	1.51538e-06	1.6384e-05	Down	0.263489	0.246931	0.241541	0.0558097	0.0412647	0.0736642	GeneID:101789759	myosin heavy chain 7B	GO:0003774,GO:0005524,GO:0016020,GO:0032982,GO:0051015,GO:0097512	motor activity|ATP binding|membrane|myosin filament|actin filament binding|cardiac myofibril	path:apla04260,path:apla04261	Cardiac muscle contraction|Adrenergic signaling in cardiomyocytes
MYO5B	97.3322	44.5747	150.09	3.36715	1.75153	2.73533e-15	7.64566e-14	Up	0.207086	0.175562	0.132041	0.520687	0.548085	0.583929	GeneID:101791989	myosin VB	GO:0000146,GO:0003091,GO:0005516,GO:0005524,GO:0015031,GO:0016192,GO:0016197,GO:0016459,GO:0017137,GO:0030659,GO:0032991,GO:0045179,GO:0051015,GO:0070062	microfilament motor activity|renal water homeostasis|calmodulin binding|ATP binding|protein transport|vesicle-mediated transport|endosomal transport|myosin complex|Rab GTPase binding|cytoplasmic vesicle membrane|protein-containing complex|apical cortex|actin filament binding|extracellular exosome
NAGLU	80.6804	109.845	51.5154	0.468982	-1.0924	3.5995e-06	3.61781e-05	Down	3.63991	4.36851	3.41586	2.18945	1.42081	2.00704	GeneID:113839970	N-acetyl-alpha-glucosaminidase	GO:0004561,GO:0005764,GO:0006027,GO:0007040,GO:0007399,GO:0021680,GO:0042474,GO:0043202,GO:0045475,GO:0046548,GO:0060119,GO:0070062	alpha-N-acetylglucosaminidase activity|lysosome|glycosaminoglycan catabolic process|lysosome organization|nervous system development|cerebellar Purkinje cell layer development|middle ear morphogenesis|lysosomal lumen|locomotor rhythm|retinal rod cell development|inner ear receptor cell development|extracellular exosome	path:apla00531,path:apla04142	Glycosaminoglycan degradation|Lysosome
NAMPT	3850.04	2314.7	5385.38	2.3266	1.21822	3.47181e-51	3.45338e-49	Up	29.4704	29.5667	34.6805	62.7288	67.7162	65.1332	GeneID:101800925	nicotinamide phosphoribosyltransferase	GO:0004514,GO:0005125,GO:0005615,GO:0005634,GO:0005737,GO:0009435,GO:0032922,GO:0047280	nicotinate-nucleotide diphosphorylase (carboxylating) activity|cytokine activity|extracellular space|nucleus|cytoplasm|NAD biosynthetic process|circadian regulation of gene expression|nicotinamide phosphoribosyltransferase activity	path:apla00760,path:apla04621	Nicotinate and nicotinamide metabolism|NOD-like receptor signaling pathway
NANP	329.071	197.333	460.808	2.33518	1.22353	2.85926e-06	2.94354e-05	Up	1.53958	1.50456	1.32515	3.65222	2.50058	3.10488	GeneID:101797319	N-acetylneuraminic acid phosphatase	GO:0005829,GO:0005975,GO:0006045,GO:0046380,GO:0050124	cytosol|carbohydrate metabolic process|N-acetylglucosamine biosynthetic process|N-acetylneuraminate biosynthetic process|N-acylneuraminate-9-phosphatase activity	path:apla00520	Amino sugar and nucleotide sugar metabolism
NAT8L	68.8974	92.9314	44.8634	0.482758	-1.05063	3.30363e-05	0.000270883	Down	1.02739	1.39326	1.40488	0.346048	0.677671	0.836014	GeneID:101793941	N-acetyltransferase 8 like	GO:0016021,GO:0017188,GO:0030867,GO:0031966	integral component of membrane|aspartate N-acetyltransferase activity|rough endoplasmic reticulum membrane|mitochondrial membrane	path:apla00250	Alanine, aspartate and glutamate metabolism
NCF1	105.434	151.884	58.9851	0.388357	-1.36454	8.54942e-08	1.14705e-06	Down	3.28085	2.61817	3.03124	0.983548	1.32878	0.872358	GeneID:101802365	neutrophil cytosolic factor 1	GO:0001878,GO:0001909,GO:0002679,GO:0005737,GO:0005791,GO:0005794,GO:0005829,GO:0005886,GO:0006612,GO:0006691,GO:0006742,GO:0006801,GO:0006915,GO:0006954,GO:0006968,GO:0008283,GO:0009617,GO:0014068,GO:0016020,GO:0016175,GO:0016176,GO:0017124,GO:0019898,GO:0030425,GO:0034614,GO:0035091,GO:0042554,GO:0042742,GO:0043020,GO:0043025,GO:0043325,GO:0045730,GO:0045741,GO:0045893,GO:0046330,GO:0050665,GO:…	response to yeast|leukocyte mediated cytotoxicity|respiratory burst involved in defense response|cytoplasm|rough endoplasmic reticulum|Golgi apparatus|cytosol|plasma membrane|protein targeting to membrane|leukotriene metabolic process|NADP catabolic process|superoxide metabolic process|apoptotic process|inflammatory response|cellular defense response|cell proliferation|response to bacterium|posit…	path:apla04145	Phagosome
NDST4	137.51	56.8665	218.153	3.83624	1.93969	7.36122e-24	3.39204e-22	Up	0.421125	0.420538	0.565443	1.78218	2.00172	1.56794	GeneID:101799313	N-deacetylase and N-sulfotransferase 4	GO:0000139,GO:0015012,GO:0015016,GO:0016021,GO:0019213,GO:0030210	Golgi membrane|heparan sulfate proteoglycan biosynthetic process|[heparan sulfate]-glucosamine N-sulfotransferase activity|integral component of membrane|deacetylase activity|heparin biosynthetic process	path:apla00534	Glycosaminoglycan biosynthesis - heparan sulfate / heparin
NEUROD1	67.1499	40.9412	93.3587	2.28031	1.18923	0.00266381	0.0130154	Up	1.2613	1.56719	1.19485	2.14154	3.85878	2.6377	GeneID:101803024	neuronal differentiation 1	GO:0003677,GO:0005634,GO:0005737,GO:0006355,GO:0042479,GO:0046983,GO:0048666	DNA binding|nucleus|cytoplasm|regulation of transcription, DNA-templated|positive regulation of eye photoreceptor cell development|protein dimerization activity|neuron development
NFKBIE	81.1879	51.9477	110.428	2.12575	1.08797	0.0205463	0.0708098	Up	0.754741	1.14943	1.27337	4.37463	1.04072	2.0428	GeneID:101804372	NFKB inhibitor epsilon	GO:0001650,GO:0005634,GO:0005737,GO:0005794,GO:0005829,GO:0042942,GO:0042994,GO:0048471	fibrillar center|nucleus|cytoplasm|Golgi apparatus|cytosol|D-serine transport|cytoplasmic sequestering of transcription factor|perinuclear region of cytoplasm	path:apla04920	Adipocytokine signaling pathway
NFKBIZ	670.197	429.07	911.324	2.12395	1.08675	1.53703e-29	9.08547e-28	Up	5.5652	5.20116	5.72491	11.0458	12.0113	11.7082	GeneID:101792607	NFKB inhibitor zeta	GO:0005634,GO:0006954,GO:0016607,GO:0036464,GO:0050729,GO:0050852,GO:2000321	nucleus|inflammatory response|nuclear speck|cytoplasmic ribonucleoprotein granule|positive regulation of inflammatory response|T cell receptor signaling pathway|positive regulation of T-helper 17 cell differentiation
NKTR	3251.64	2058.59	4444.7	2.1591	1.11043	3.90421e-61	4.36514e-59	Up	10.0589	9.6746	10.4445	19.1508	20.596	19.5669	GeneID:101791002	natural killer cell triggering receptor	GO:0000413,GO:0003755,GO:0005634,GO:0005654,GO:0005739,GO:0005829,GO:0005886,GO:0016018,GO:0042026,GO:0051082	protein peptidyl-prolyl isomerization|peptidyl-prolyl cis-trans isomerase activity|nucleus|nucleoplasm|mitochondrion|cytosol|plasma membrane|cyclosporin A binding|protein refolding|unfolded protein binding
NKX2-5	4.54877	0.651765	8.44577	12.9583	3.69581	0.00349505	0.0163295	Up	0.0443062	0	0	0.553359	0.236312	0.367059	GeneID:101801478	NK2 homeobox 5	GO:0000978,GO:0003700,GO:0005634,GO:0006357,GO:0007507,GO:0032991,GO:0032993,GO:0060048,GO:0071772,GO:1903779	RNA polymerase II proximal promoter sequence-specific DNA binding|DNA-binding transcription factor activity|nucleus|regulation of transcription by RNA polymerase II|heart development|protein-containing complex|protein-DNA complex|cardiac muscle contraction|response to BMP|regulation of cardiac conduction
NLGN1	472.132	298.699	645.565	2.16126	1.11187	8.06735e-20	3.0066e-18	Up	1.30155	1.25561	1.28276	2.42549	2.85117	2.44457	GeneID:101796987	neuroligin 1	GO:0002087,GO:0005794,GO:0005886,GO:0005887,GO:0006605,GO:0007157,GO:0007158,GO:0007399,GO:0007416,GO:0009897,GO:0009986,GO:0010841,GO:0014069,GO:0016080,GO:0016339,GO:0017146,GO:0030054,GO:0030165,GO:0030425,GO:0031175,GO:0032230,GO:0032433,GO:0035418,GO:0038023,GO:0042043,GO:0043197,GO:0043198,GO:0045184,GO:0045202,GO:0045664,GO:0046983,GO:0048488,GO:0048489,GO:0048511,GO:0048789,GO:0050804,GO:…	regulation of respiratory gaseous exchange by neurological system process|Golgi apparatus|plasma membrane|integral component of plasma membrane|protein targeting|heterophilic cell-cell adhesion via plasma membrane cell adhesion molecules|neuron cell-cell adhesion|nervous system development|synapse assembly|external side of plasma membrane|cell surface|positive regulation of circadian sleep/wake c…	path:apla04514	Cell adhesion molecules (CAMs)
NLRC5	741.524	31.8707	1451.18	45.5334	5.50885	3.5875e-149	9.40772e-147	Up	0.182843	0.212569	0.125522	8.35373	7.18134	7.12386	GeneID:101796943	NLR family CARD domain containing 5	GO:0000978,GO:0005524,GO:0005634,GO:0005737,GO:0005813,GO:0005829,GO:0009617,GO:0032088,GO:0032480,GO:0035556,GO:0043549,GO:0045087,GO:0045345,GO:0045944,GO:0051607,GO:0060335,GO:0060339,GO:0060340	RNA polymerase II proximal promoter sequence-specific DNA binding|ATP binding|nucleus|cytoplasm|centrosome|cytosol|response to bacterium|negative regulation of NF-kappaB transcription factor activity|negative regulation of type I interferon production|intracellular signal transduction|regulation of kinase activity|innate immune response|positive regulation of MHC class I biosynthetic process|posi…
NMI	3043.15	514.259	5572.04	10.8351	3.43764	1.97923e-153	5.38613e-151	Up	8.6664	10.2461	10.3378	92.9018	95.1728	91.9887	GeneID:101797758	N-myc and STAT interactor	GO:0003712,GO:0005654,GO:0005737,GO:0005829,GO:0006366,GO:0006954,GO:0007259,GO:0042802,GO:0045355,GO:0045358,GO:0045824,GO:0060333,GO:1902524	transcription coregulator activity|nucleoplasm|cytoplasm|cytosol|transcription by RNA polymerase II|inflammatory response|JAK-STAT cascade|identical protein binding|negative regulation of interferon-alpha biosynthetic process|negative regulation of interferon-beta biosynthetic process|negative regulation of innate immune response|interferon-gamma-mediated signaling pathway|positive regulation of …
NOG	23.1567	34.4836	11.8297	0.343054	-1.54349	0.000566847	0.0034265	Down	1.55797	1.14595	1.23868	0.61954	0.248466	0.579256	GeneID:101796147	noggin	GO:0001649,GO:0005615,GO:0005623,GO:0030514,GO:0051151,GO:0051216,GO:1902747	osteoblast differentiation|extracellular space|cell|negative regulation of BMP signaling pathway|negative regulation of smooth muscle cell differentiation|cartilage development|negative regulation of lens fiber cell differentiation	path:apla04350	TGF-beta signaling pathway
NOS2	5143.73	1929.27	8358.19	4.3323	2.11513	1.24742e-235	4.38817e-233	Up	16.5352	16.8607	18.4935	67.2692	71.5222	70.0651	GeneID:101804455	nitric oxide synthase 2	GO:0003958,GO:0004517,GO:0005516,GO:0005634,GO:0005829,GO:0005886,GO:0006527,GO:0006809,GO:0007263,GO:0009725,GO:0010181,GO:0012506,GO:0016491,GO:0018119,GO:0020037,GO:0031284,GO:0032310,GO:0032496,GO:0042742,GO:0045776,GO:0046872,GO:0050660,GO:0050661,GO:0072604,GO:0072606,GO:1900015	NADPH-hemoprotein reductase activity|nitric-oxide synthase activity|calmodulin binding|nucleus|cytosol|plasma membrane|arginine catabolic process|nitric oxide biosynthetic process|nitric oxide mediated signal transduction|response to hormone|FMN binding|vesicle membrane|oxidoreductase activity|peptidyl-cysteine S-nitrosylation|heme binding|positive regulation of guanylate cyclase activity|prostag…	path:apla00220,path:apla00330,path:apla04020,path:apla04146,path:apla04371,path:apla05132	Arginine biosynthesis|Arginine and proline metabolism|Calcium signaling pathway|Peroxisome|Apelin signaling pathway|Salmonella infection
NOXO1	8.09214	3.56281	12.6215	3.54256	1.82479	0.0210448	0.0722344	Up	0.0181275	0.0733041	0.090659	0.190366	0.231644	0.144812	GeneID:101796758	NADPH oxidase organizer 1	GO:0006801,GO:0016176,GO:0019899,GO:0022617,GO:0035091,GO:0043020	superoxide metabolic process|superoxide-generating NADPH oxidase activator activity|enzyme binding|extracellular matrix disassembly|phosphatidylinositol binding|NADPH oxidase complex
NPY	93.6589	126.343	60.9751	0.482617	-1.05105	1.63416e-06	1.75154e-05	Down	9.7065	11.5208	12.5663	5.23449	4.24832	6.00347	GeneID:101796619	neuropeptide Y	GO:0001664,GO:0005184,GO:0005615,GO:0005794,GO:0007218,GO:0008217,GO:0021954,GO:0021987,GO:0031175,GO:0031841	G protein-coupled receptor binding|neuropeptide hormone activity|extracellular space|Golgi apparatus|neuropeptide signaling pathway|regulation of blood pressure|central nervous system neuron development|cerebral cortex development|neuron projection development|neuropeptide Y receptor binding	path:apla04080,path:apla04920	Neuroactive ligand-receptor interaction|Adipocytokine signaling pathway
NR4A1	11.595	19.8342	3.35574	0.16919	-2.56329	0.000192508	0.00132279	Down	0.929205	0.834806	0.752396	0.315328	0	0.175995	GeneID:101800531	nuclear receptor subfamily 4 group A member 1	GO:0003707,GO:0004879,GO:0005634,GO:0005737,GO:0008270,GO:0043565	steroid hormone receptor activity|nuclear receptor activity|nucleus|cytoplasm|zinc ion binding|sequence-specific DNA binding	path:apla04010	MAPK signaling pathway
NR4A3	160.04	85.5128	234.568	2.74307	1.45579	7.26652e-15	1.97373e-13	Up	0.876912	0.763945	0.961446	2.2528	2.59728	1.93255	GeneID:101795028	nuclear receptor subfamily 4 group A member 3	GO:0000122,GO:0000977,GO:0000978,GO:0001077,GO:0001223,GO:0001707,GO:0003677,GO:0003707,GO:0004879,GO:0005634,GO:0005667,GO:0007369,GO:0007411,GO:0008270,GO:0009444,GO:0010613,GO:0010828,GO:0019901,GO:0021766,GO:0030534,GO:0031100,GO:0032765,GO:0035035,GO:0035259,GO:0035497,GO:0035726,GO:0038097,GO:0042542,GO:0042629,GO:0042803,GO:0043303,GO:0043434,GO:0043524,GO:0043565,GO:0044320,GO:0045333,GO:…	negative regulation of transcription by RNA polymerase II|RNA polymerase II regulatory region sequence-specific DNA binding|RNA polymerase II proximal promoter sequence-specific DNA binding|proximal promoter DNA-binding transcription activator activity, RNA polymerase II-specific|transcription coactivator binding|mesoderm formation|DNA binding|steroid hormone receptor activity|nuclear receptor ac…
NUB1	2049.21	1091	3007.41	2.75656	1.46287	2.99328e-86	4.8508e-84	Up	14.7172	15.4346	14.6081	34.5635	36.6674	35.2303	GeneID:101792335	negative regulator of ubiquitin like proteins 1	GO:0005634,GO:0005829,GO:0006511,GO:0016567,GO:0032436,GO:0034341,GO:0034612,GO:0043687	nucleus|cytosol|ubiquitin-dependent protein catabolic process|protein ubiquitination|positive regulation of proteasomal ubiquitin-dependent protein catabolic process|response to interferon-gamma|response to tumor necrosis factor|post-translational protein modification
NUGGC	316.127	18.2312	614.022	33.6798	5.07381	1.11823e-131	2.64397e-129	Up	0.253251	0.15119	0.151282	5.33013	5.49971	4.56444	GeneID:101802642	nuclear GTPase, germinal center associated	GO:0003924,GO:0005525,GO:0016607,GO:0033262,GO:0043066,GO:0071222,GO:0097752	GTPase activity|GTP binding|nuclear speck|regulation of nuclear cell cycle DNA replication|negative regulation of apoptotic process|cellular response to lipopolysaccharide|regulation of DNA stability
OBSL1	29.77	43.5466	15.9935	0.367274	-1.44507	0.000207585	0.00141426	Down	0.716293	1.15906	0.757026	0.553435	0.437097	0.111352	GeneID:101801279	obscurin like 1	GO:0000226,GO:0005737,GO:0005794,GO:0005813,GO:0005829,GO:0005865,GO:0006936,GO:0007010,GO:0007030,GO:0007088,GO:0008093,GO:0008307,GO:0014704,GO:0030017,GO:0030018,GO:0030240,GO:0030241,GO:0031430,GO:0034067,GO:0043687,GO:0045214,GO:0048471,GO:0048739,GO:0050775,GO:0051015,GO:0051371,GO:0055003,GO:0055008,GO:1990393	microtubule cytoskeleton organization|cytoplasm|Golgi apparatus|centrosome|cytosol|striated muscle thin filament|muscle contraction|cytoskeleton organization|Golgi organization|regulation of mitotic nuclear division|cytoskeletal adaptor activity|structural constituent of muscle|intercalated disc|sarcomere|Z disc|skeletal muscle thin filament assembly|skeletal muscle myosin thick filament assembly…
OGFR	7441.03	1644.25	13237.8	8.05095	3.00916	2.67936e-177	8.40096e-175	Up	15.8739	15.449	15.3778	113.847	110.929	107.776	GeneID:101799702	opioid growth factor receptor	GO:0004985,GO:0005634,GO:0005737,GO:0016020,GO:0040008	opioid receptor activity|nucleus|cytoplasm|membrane|regulation of growth
OLFML1	157.659	86.7929	228.525	2.63299	1.3967	9.62939e-16	2.78885e-14	Up	1.3509	1.13154	1.47584	3.27026	2.89515	3.36487	GeneID:101799039	olfactomedin like 1	GO:0005576	extracellular region
OLIG2	10.8978	5.86451	15.9312	2.71654	1.44177	0.0276646	0.0898866	Up	0.218697	0	0.325676	1.23895	0.614352	0.697097	GeneID:113842338	oligodendrocyte transcription factor 2	GO:0000122,GO:0003677,GO:0003700,GO:0003705,GO:0005634,GO:0005667,GO:0005737,GO:0006355,GO:0007399,GO:0021522,GO:0021529,GO:0021530,GO:0021794,GO:0042552,GO:0042803,GO:0045665,GO:0048663,GO:0048709,GO:0048714,GO:0071837	negative regulation of transcription by RNA polymerase II|DNA binding|DNA-binding transcription factor activity|transcription factor activity, RNA polymerase II distal enhancer sequence-specific binding|nucleus|transcription factor complex|cytoplasm|regulation of transcription, DNA-templated|nervous system development|spinal cord motor neuron differentiation|spinal cord oligodendrocyte cell diffe…
ONECUT1	29.1288	18.5244	39.7332	2.14491	1.10092	0.00466846	0.020769	Up	0.104748	0.0651763	0.162732	0.209572	0.236738	0.262681	GeneID:101793784	one cut homeobox 1	GO:0001077,GO:0003677,GO:0003705,GO:0005634,GO:0006006,GO:0030154,GO:0045944	proximal promoter DNA-binding transcription activator activity, RNA polymerase II-specific|DNA binding|transcription factor activity, RNA polymerase II distal enhancer sequence-specific binding|nucleus|glucose metabolic process|cell differentiation|positive regulation of transcription by RNA polymerase II
ONECUT2	12.1448	18.2005	6.08905	0.334554	-1.57969	0.0117744	0.0451655	Down	0.166794	0.220096	0.105274	0.0517424	0.035857	0.0711905	GeneID:113840184	one cut homeobox 2	GO:0000978,GO:0001077,GO:0001889,GO:0001952,GO:0002064,GO:0003677,GO:0003700,GO:0005634,GO:0005654,GO:0009653,GO:0015629,GO:0030154,GO:0030335,GO:0030512,GO:0031016,GO:0031018,GO:0045165,GO:0045944,GO:0048935,GO:0060271	RNA polymerase II proximal promoter sequence-specific DNA binding|proximal promoter DNA-binding transcription activator activity, RNA polymerase II-specific|liver development|regulation of cell-matrix adhesion|epithelial cell development|DNA binding|DNA-binding transcription factor activity|nucleus|nucleoplasm|anatomical structure morphogenesis|actin cytoskeleton|cell differentiation|positive reg…
OPRM1	39.8203	25.3696	54.271	2.13922	1.09708	0.000933457	0.00527971	Up	0.461152	0.394695	0.331647	0.766915	0.786006	0.852395	GeneID:101804405	opioid receptor mu 1	GO:0001965,GO:0004930,GO:0004979,GO:0005245,GO:0005768,GO:0005886,GO:0005887,GO:0007194,GO:0007200,GO:0007218,GO:0019233,GO:0030424,GO:0030425,GO:0031681,GO:0038003,GO:0038047,GO:0042923,GO:0043204,GO:0043951,GO:0045019,GO:0050769,GO:0051481,GO:0061358,GO:0070374,GO:2000310	G-protein alpha-subunit binding|G protein-coupled receptor activity|beta-endorphin receptor activity|voltage-gated calcium channel activity|endosome|plasma membrane|integral component of plasma membrane|negative regulation of adenylate cyclase activity|phospholipase C-activating G protein-coupled receptor signaling pathway|neuropeptide signaling pathway|sensory perception of pain|axon|dendrite|G-…	path:apla04080	Neuroactive ligand-receptor interaction
OPTN	2289.21	818.103	3760.31	4.59638	2.2005	8.28891e-36	6.13082e-34	Up	9.98336	9.87699	9.866	38.6899	46.0134	39.3173	GeneID:101791650	optineurin	GO:0001920,GO:0005634,GO:0005737,GO:0005776,GO:0005794,GO:0005802,GO:0005829,GO:0006914,GO:0008022,GO:0017137,GO:0030674,GO:0034067,GO:0034620,GO:0042802,GO:0043001,GO:0043124,GO:0046872,GO:0048471,GO:0050829,GO:0055037,GO:0061734,GO:0070530,GO:0090161,GO:1904417	negative regulation of receptor recycling|nucleus|cytoplasm|autophagosome|Golgi apparatus|trans-Golgi network|cytosol|autophagy|protein C-terminus binding|Rab GTPase binding|protein binding, bridging|protein localization to Golgi apparatus|cellular response to unfolded protein|identical protein binding|Golgi to plasma membrane protein transport|negative regulation of I-kappaB kinase/NF-kappaB sig…	path:apla04137	Mitophagy - animal
ORC1	364.196	234.371	494.021	2.10786	1.07578	3.66608e-19	1.3186e-17	Up	3.2	3.103	2.97455	6.01295	5.84146	5.98786	GeneID:101800002	origin recognition complex subunit 1	GO:0000082,GO:0000083,GO:0000278,GO:0000784,GO:0000808,GO:0003677,GO:0003682,GO:0003688,GO:0005524,GO:0005634,GO:0005654,GO:0005664,GO:0005730,GO:0005829,GO:0005886,GO:0006260,GO:0006270,GO:0033314,GO:0046872	G1/S transition of mitotic cell cycle|regulation of transcription involved in G1/S transition of mitotic cell cycle|mitotic cell cycle|nuclear chromosome, telomeric region|origin recognition complex|DNA binding|chromatin binding|DNA replication origin binding|ATP binding|nucleus|nucleoplasm|nuclear origin of replication recognition complex|nucleolus|cytosol|plasma membrane|DNA replication|DNA rep…	path:apla04110	Cell cycle
P2RX7	287.692	78.5919	496.792	6.32116	2.66019	1.03912e-74	1.36247e-72	Up	0.945184	1.24746	1.32146	6.42386	6.831	6.61851	GeneID:101801281	purinergic receptor P2X 7			path:apla04020,path:apla04080,path:apla04621	Calcium signaling pathway|Neuroactive ligand-receptor interaction|NOD-like receptor signaling pathway
P3H4	35.3856	49.3793	21.3919	0.433215	-1.20685	0.000650996	0.00387029	Down	2.64626	4.01127	3.00968	1.04937	1.25618	1.39407	GeneID:101793970	prolyl 3-hydroxylase family member 4 (non-enzymatic)	GO:0000794,GO:0000795,GO:0005730,GO:0005783,GO:0007130,GO:0017185,GO:0030199,GO:0032964,GO:0046849,GO:1902494	condensed nuclear chromosome|synaptonemal complex|nucleolus|endoplasmic reticulum|synaptonemal complex assembly|peptidyl-lysine hydroxylation|collagen fibril organization|collagen biosynthetic process|bone remodeling|catalytic complex
PACRG	25.5211	36.0431	14.999	0.416141	-1.26486	0.00280211	0.013562	Down	1.33627	1.93685	2.55563	0.670518	0.768543	0.482292	GeneID:101801869	parkin coregulated	GO:0001664,GO:0003779,GO:0005739,GO:0005829,GO:0005929,GO:0007286,GO:0030544,GO:0031072,GO:0031625,GO:0031982,GO:0034620,GO:0043005,GO:0043014,GO:0044297,GO:0048487,GO:0051087,GO:0051879,GO:0060548,GO:0097225	G protein-coupled receptor binding|actin binding|mitochondrion|cytosol|cilium|spermatid development|Hsp70 protein binding|heat shock protein binding|ubiquitin protein ligase binding|vesicle|cellular response to unfolded protein|neuron projection|alpha-tubulin binding|cell body|beta-tubulin binding|chaperone binding|Hsp90 protein binding|negative regulation of cell death|sperm midpiece
PANX1	346.856	204.1	489.611	2.39888	1.26236	5.89261e-18	1.9628e-16	Up	3.12183	3.53666	2.58008	6.52685	7.71957	6.68264	GeneID:101790508	pannexin 1			path:apla04621	NOD-like receptor signaling pathway
PARP9	5092.73	185.199	10000.3	53.9973	5.75482	0	0	Up	1.46778	2.16177	1.67397	91.5453	91.7415	91.004	GeneID:101789724	poly(ADP-ribose) polymerase family member 9	GO:0000122,GO:0002230,GO:0003714,GO:0003950,GO:0004857,GO:0005634,GO:0005654,GO:0005737,GO:0005739,GO:0005829,GO:0006302,GO:0006471,GO:0010608,GO:0010629,GO:0016020,GO:0016477,GO:0019899,GO:0032991,GO:0034356,GO:0035563,GO:0042393,GO:0042531,GO:0043086,GO:0044389,GO:0045087,GO:0045893,GO:0051607,GO:0060330,GO:0060335,GO:0072570,GO:0090734,GO:0097677,GO:1900182,GO:2001034	negative regulation of transcription by RNA polymerase II|positive regulation of defense response to virus by host|transcription corepressor activity|NAD+ ADP-ribosyltransferase activity|enzyme inhibitor activity|nucleus|nucleoplasm|cytoplasm|mitochondrion|cytosol|double-strand break repair|protein ADP-ribosylation|posttranscriptional regulation of gene expression|negative regulation of gene expr…
PATL2	95.594	56.6505	134.537	2.37487	1.24785	3.51114e-08	4.97347e-07	Up	0.967999	0.380903	0.621794	2.09818	1.15279	1.47677	GeneID:101793012	PAT1 homolog 2	GO:0000932,GO:0002151,GO:0003723,GO:0005634,GO:0005737,GO:0008266,GO:0010607,GO:0017148,GO:0030371,GO:0034046,GO:1990904	P-body|G-quadruplex RNA binding|RNA binding|nucleus|cytoplasm|poly(U) RNA binding|negative regulation of cytoplasmic mRNA processing body assembly|negative regulation of translation|translation repressor activity|poly(G) binding|ribonucleoprotein complex	path:apla03018	RNA degradation
PCDH12	5.72577	2.27342	9.17812	4.03714	2.01333	0.0368338	0.11215	Up	0.0236432	0.0371384	0.0240671	0.113591	0.12534	0.123371	GeneID:101802569	protocadherin 12	GO:0005509,GO:0005886,GO:0005887,GO:0005911,GO:0005977,GO:0007155,GO:0007156,GO:0008038,GO:0016339,GO:0060711,GO:0070062	calcium ion binding|plasma membrane|integral component of plasma membrane|cell-cell junction|glycogen metabolic process|cell adhesion|homophilic cell adhesion via plasma membrane adhesion molecules|neuron recognition|calcium-dependent cell-cell adhesion via plasma membrane cell adhesion molecules|labyrinthine layer development|extracellular exosome
PCDH8	43.6462	61.4492	25.8431	0.420561	-1.24961	9.01631e-05	0.000668254	Down	0.898846	0.801857	0.824879	0.236633	0.392233	0.513708	GeneID:101800758	protocadherin 8	GO:0001756,GO:0005509,GO:0005886,GO:0005887,GO:0007155,GO:0007156,GO:0007267,GO:0007268,GO:0016331,GO:0030054,GO:0030425,GO:0042734,GO:0098978,GO:0099055,GO:0099179	somitogenesis|calcium ion binding|plasma membrane|integral component of plasma membrane|cell adhesion|homophilic cell adhesion via plasma membrane adhesion molecules|cell-cell signaling|chemical synaptic transmission|morphogenesis of embryonic epithelium|cell junction|dendrite|presynaptic membrane|glutamatergic synapse|integral component of postsynaptic membrane|regulation of synaptic membrane ad…
PDCD1LG2	16.6548	6.81578	26.4938	3.88713	1.9587	0.000284179	0.00186644	Up	0.0533415	0.139084	0.0702707	0.254507	0.243861	0.263957	GeneID:101798906	programmed cell death 1 ligand 2	GO:0005576,GO:0005886,GO:0006955,GO:0007165,GO:0007166,GO:0009897,GO:0009986,GO:0012505,GO:0016021,GO:0031295,GO:0032689,GO:0032693,GO:0042102,GO:0042130,GO:0046007,GO:0071222	extracellular region|plasma membrane|immune response|signal transduction|cell surface receptor signaling pathway|external side of plasma membrane|cell surface|endomembrane system|integral component of membrane|T cell costimulation|negative regulation of interferon-gamma production|negative regulation of interleukin-10 production|positive regulation of T cell proliferation|negative regulation of T…	path:apla04514	Cell adhesion molecules (CAMs)
PFKFB3	736.958	391.823	1082.09	2.76169	1.46555	5.4666e-54	5.59183e-52	Up	3.14919	3.56513	3.29656	8.84632	9.05708	8.3254	GeneID:101791426	6-phosphofructo-2-kinase/fructose-2,6-biphosphatase 3	GO:0003873,GO:0004331,GO:0005524,GO:0005654,GO:0005829,GO:0006000,GO:0006003,GO:0006110,GO:0007420	6-phosphofructo-2-kinase activity|fructose-2,6-bisphosphate 2-phosphatase activity|ATP binding|nucleoplasm|cytosol|fructose metabolic process|fructose 2,6-bisphosphate metabolic process|regulation of glycolytic process|brain development	path:apla00051	Fructose and mannose metabolism
PGR	15.5872	22.7301	8.44429	0.371503	-1.42855	0.00893162	0.0359232	Down	0.123396	0.352058	0.470702	0.189495	0.099579	0.12328	GeneID:101797573	progesterone receptor	GO:0000790,GO:0003700,GO:0003707,GO:0005634,GO:0005829,GO:0008270,GO:0016363,GO:0019899,GO:0030544,GO:0031490,GO:0032570,GO:0032993,GO:0043235,GO:0043565,GO:0043627,GO:0051879,GO:1990239	nuclear chromatin|DNA-binding transcription factor activity|steroid hormone receptor activity|nucleus|cytosol|zinc ion binding|nuclear matrix|enzyme binding|Hsp70 protein binding|chromatin DNA binding|response to progesterone|protein-DNA complex|receptor complex|sequence-specific DNA binding|response to estrogen|Hsp90 protein binding|steroid hormone binding	path:apla04114,path:apla04914	Oocyte meiosis|Progesterone-mediated oocyte maturation
PHACTR1	166.204	102.09	230.318	2.25604	1.17379	3.30983e-12	7.16783e-11	Up	0.8243	0.770041	0.654881	1.41959	1.67327	1.58066	GeneID:101800961	phosphatase and actin regulator 1	GO:0003779,GO:0004864,GO:0005634,GO:0005829,GO:0008157,GO:0030054,GO:0031032,GO:0031532,GO:0043149,GO:0045202	actin binding|protein phosphatase inhibitor activity|nucleus|cytosol|protein phosphatase 1 binding|cell junction|actomyosin structure organization|actin cytoskeleton reorganization|stress fiber assembly|synapse
PHF24	6.41094	10.4265	2.39535	0.229736	-2.12195	0.0198783	0.0689027	Down	0.376639	0.0842473	0.299159	0.0372104	0.113308	0.0549133	GeneID:101798384	PHD finger protein 24	GO:0007214,GO:0008277,GO:0032228,GO:0046872,GO:0050966	gamma-aminobutyric acid signaling pathway|regulation of G protein-coupled receptor signaling pathway|regulation of synaptic transmission, GABAergic|metal ion binding|detection of mechanical stimulus involved in sensory perception of pain
PIGY	123.154	180.134	66.1735	0.367357	-1.44474	1.68528e-13	4.09205e-12	Down	29.0796	28.6695	27.0292	8.35794	8.89394	9.99038	GeneID:101795072	phosphatidylinositol glycan anchor biosynthesis class Y	GO:0000506,GO:0005789,GO:0005886,GO:0006506,GO:0016021,GO:0016254	glycosylphosphatidylinositol-N-acetylglucosaminyltransferase (GPI-GnT) complex|endoplasmic reticulum membrane|plasma membrane|GPI anchor biosynthetic process|integral component of membrane|preassembly of GPI anchor in ER membrane	path:apla00563	Glycosylphosphatidylinositol (GPI)-anchor biosynthesis
PLA2G1B	1.79072	3.58144	0	0	#NAME?	0.0412871	0.122755	Down	0	0.0637309	0	0	0	0	GeneID:101800970	phospholipase A2 group IB			path:apla00564,path:apla00565,path:apla00590,path:apla00591,path:apla00592,path:apla04270	Glycerophospholipid metabolism|Ether lipid metabolism|Arachidonic acid metabolism|Linoleic acid metabolism|alpha-Linolenic acid metabolism|Vascular smooth muscle contraction
PLAGL1	1204.3	674.975	1733.63	2.56843	1.36089	1.27442e-62	1.43601e-60	Up	4.71166	4.61516	5.21625	11.6894	11.7824	11.6878	GeneID:101791677	PLAG1 like zinc finger 1
PLCL1	92.2166	123.434	60.9988	0.49418	-1.01689	4.00766e-06	4.00294e-05	Down	0.766721	0.985999	0.776569	0.439143	0.318316	0.393069	GeneID:101800952	phospholipase C like 1 (inactive)	GO:0004435,GO:0005737,GO:0006629,GO:0032228,GO:0035556,GO:0050811,GO:0070679,GO:0120163	phosphatidylinositol phospholipase C activity|cytoplasm|lipid metabolic process|regulation of synaptic transmission, GABAergic|intracellular signal transduction|GABA receptor binding|inositol 1,4,5 trisphosphate binding|negative regulation of cold-induced thermogenesis
PLEKHS1	71.8452	36.3464	107.344	2.95336	1.56235	2.39748e-06	2.49847e-05	Up	0.230404	0.514409	0.288338	0.962272	0.575748	0.852607	GeneID:101800299	pleckstrin homology domain containing S1
PLVAP	24.4191	16.2183	32.62	2.01131	1.00814	0.0180992	0.0637629	Up	0.384886	0.707333	0.576649	1.15767	1.29186	1.46297	GeneID:101805361	plasmalemma vesicle associated protein	GO:0000165,GO:0002693,GO:0005901,GO:0009986,GO:0016021,GO:0033209,GO:0042803,GO:0048471,GO:0070062	MAPK cascade|positive regulation of cellular extravasation|caveola|cell surface|integral component of membrane|tumor necrosis factor-mediated signaling pathway|protein homodimerization activity|perinuclear region of cytoplasm|extracellular exosome
PML	878.679	156.321	1601.04	10.2419	3.35642	1.5124e-219	5.19366e-217	Up	3.24571	3.45476	3.44487	44.5748	37.2531	39.236	GeneID:113844857	promyelocytic leukemia			path:apla04120,path:apla04144,path:apla05164,path:apla05168	Ubiquitin mediated proteolysis|Endocytosis|Influenza A|Herpes simplex infection
PNP	2.91639	0	5.83277	Inf	Inf	0.0211575	0.0725522	Up	0	0	0	0	0.13471	0	GeneID:101789787	purine nucleoside phosphorylase	GO:0001882,GO:0001916,GO:0002060,GO:0004731,GO:0005576,GO:0005622,GO:0005634,GO:0005737,GO:0005829,GO:0005856,GO:0006148,GO:0006149,GO:0006161,GO:0006183,GO:0008144,GO:0008630,GO:0008637,GO:0010332,GO:0034418,GO:0042102,GO:0042278,GO:0042301,GO:0045579,GO:0045739,GO:0046070,GO:0046115,GO:0046638,GO:0070233	nucleoside binding|positive regulation of T cell mediated cytotoxicity|purine nucleobase binding|purine-nucleoside phosphorylase activity|extracellular region|intracellular|nucleus|cytoplasm|cytosol|cytoskeleton|inosine catabolic process|deoxyinosine catabolic process|deoxyguanosine catabolic process|GTP biosynthetic process|drug binding|intrinsic apoptotic signaling pathway in response to DNA da…	path:apla00230,path:apla00240,path:apla00760	Purine metabolism|Pyrimidine metabolism|Nicotinate and nicotinamide metabolism
PNRC1	4478.11	2769.63	6186.59	2.23372	1.15945	3.48863e-64	3.96193e-62	Up	120.878	121.483	114.951	243.462	249.142	257.348	GeneID:101797994	proline rich nuclear receptor coactivator 1	GO:0005634	nucleus
POMC	19.9884	0.96989	39.0068	40.2178	5.32976	9.21918e-15	2.47613e-13	Up	0	0.118138	0	1.45852	1.21247	1.70183	GeneID:101790746	proopiomelanocortin	GO:0005179,GO:0005576,GO:0007218	hormone activity|extracellular region|neuropeptide signaling pathway	path:apla04080,path:apla04916,path:apla04920	Neuroactive ligand-receptor interaction|Melanogenesis|Adipocytokine signaling pathway
POPDC2	122.847	164.696	80.9979	0.491803	-1.02385	0.00313064	0.014907	Down	4.12841	2.83504	2.39021	1.7923	1.99242	1.21996	GeneID:101802631	popeye domain containing 2	GO:0002027,GO:0007507,GO:0007519,GO:0016020,GO:0016021,GO:0030552,GO:0042383,GO:0042391,GO:0060931	regulation of heart rate|heart development|skeletal muscle tissue development|membrane|integral component of membrane|cAMP binding|sarcolemma|regulation of membrane potential|sinoatrial node cell development
PPEF1	83.3182	48.0889	118.547	2.46517	1.30169	2.49178e-08	3.58315e-07	Up	0.312022	0.353051	0.386902	0.84898	0.803998	0.732551	GeneID:101803160	protein phosphatase with EF-hand domain 1	GO:0004722,GO:0005506,GO:0005509,GO:0005829,GO:0006470,GO:0022400,GO:0030145,GO:0050906	protein serine/threonine phosphatase activity|iron ion binding|calcium ion binding|cytosol|protein dephosphorylation|regulation of rhodopsin mediated signaling pathway|manganese ion binding|detection of stimulus involved in sensory perception
PPP1R36	29.5996	18.522	40.6772	2.19615	1.13498	0.00323217	0.0152995	Up	0.164427	0.151525	0.193689	0.4068	0.284973	0.321785	GeneID:101795467	protein phosphatase 1 regulatory subunit 36	GO:0004864,GO:0010923,GO:0019902	protein phosphatase inhibitor activity|negative regulation of phosphatase activity|phosphatase binding
PRDM1	322.204	173.674	470.733	2.71044	1.43853	3.46683e-29	2.02437e-27	Up	0.690432	0.438731	0.403616	1.18355	1.57728	1.39159	GeneID:101797804	PR/SET domain 1
PRICKLE4	46.2213	18.8239	73.6188	3.91091	1.96751	1.00887e-09	1.71997e-08	Up	0.204443	0.459042	0.79767	3.2101	1.89072	1.80581	GeneID:101792651	prickle planar cell polarity protein 4	GO:0005737,GO:0008270,GO:0031965,GO:0060071	cytoplasm|zinc ion binding|nuclear membrane|Wnt signaling pathway, planar cell polarity pathway
PROK2	38.654	53.026	24.2819	0.457925	-1.12682	0.00633395	0.0269244	Down	4.23542	2.79667	0.446773	1.46949	0	0.896411	GeneID:101792749	prokineticin 2	GO:0005576,GO:0090729	extracellular region|toxin activity
PRRG4	33.1505	19.1597	47.1414	2.46045	1.29892	0.000394662	0.00249549	Up	0.332654	0.396863	0.460526	0.800419	0.841701	1.0397	GeneID:101796624	proline rich and Gla domain 4	GO:0005509,GO:0005576,GO:0016021,GO:0033116	calcium ion binding|extracellular region|integral component of membrane|endoplasmic reticulum-Golgi intermediate compartment membrane
PSRC1	60.6369	86.7405	34.5333	0.398122	-1.32872	1.17031e-06	1.29146e-05	Down	1.50646	2.01304	1.89716	1.29292	0.421663	0.878126	GeneID:113839748	proline and serine rich coiled-coil 1	GO:0000922,GO:0001578,GO:0005654,GO:0005737,GO:0005819,GO:0005829,GO:0005876,GO:0007080,GO:0008017,GO:0009987,GO:0015630,GO:0030308,GO:0030496,GO:0031116,GO:0045737,GO:0045893,GO:0051301,GO:0060236	spindle pole|microtubule bundle formation|nucleoplasm|cytoplasm|spindle|cytosol|spindle microtubule|mitotic metaphase plate congression|microtubule binding|cellular process|microtubule cytoskeleton|negative regulation of cell growth|midbody|positive regulation of microtubule polymerization|positive regulation of cyclin-dependent protein serine/threonine kinase activity|positive regulation of tran…
PTCH2	18.9389	26.6379	11.24	0.421955	-1.24484	0.0104815	0.0410354	Down	0.376808	0.327222	0.432231	0.141276	0.236462	0.208392	GeneID:101795536	patched 2	GO:0001649,GO:0005119,GO:0005886,GO:0007224,GO:0008158,GO:0009954,GO:0010002,GO:0016021,GO:0031290,GO:0043010,GO:0045879,GO:0048635,GO:0097108	osteoblast differentiation|smoothened binding|plasma membrane|smoothened signaling pathway|hedgehog receptor activity|proximal/distal pattern formation|cardioblast differentiation|integral component of membrane|retinal ganglion cell axon guidance|camera-type eye development|negative regulation of smoothened signaling pathway|negative regulation of muscle organ development|hedgehog family protein …	path:apla04340	Hedgehog signaling pathway
PTCHD3	140.179	13.3279	267.03	20.0354	4.32448	1.49637e-75	2.03605e-73	Up	0.338885	0.290061	0.363449	6.19434	6.11393	5.4848	GeneID:101800181	patched domain containing 3	GO:0016021,GO:0097225	integral component of membrane|sperm midpiece
PTGFRN	945.08	256.162	1634	6.37876	2.67328	3.75596e-178	1.20383e-175	Up	3.27399	2.78168	3.11755	21.67	18.5335	19.9924	GeneID:101794936	prostaglandin F2 receptor inhibitor	GO:0005789,GO:0005794,GO:0009986,GO:0016021,GO:0034389	endoplasmic reticulum membrane|Golgi apparatus|cell surface|integral component of membrane|lipid droplet organization
PTGS2	2957.26	1780.75	4133.76	2.32135	1.21497	5.33004e-31	3.29936e-29	Up	15.7805	16.5057	15.3576	33.0772	37.5372	33.3379	GeneID:101790135	prostaglandin-endoperoxide synthase 2	GO:0001516,GO:0004601,GO:0004666,GO:0005737,GO:0005789,GO:0006954,GO:0006979,GO:0008217,GO:0019371,GO:0019899,GO:0020037,GO:0031090,GO:0031394,GO:0031622,GO:0033138,GO:0042127,GO:0042803,GO:0043005,GO:0043154,GO:0046872,GO:0051213,GO:0071456,GO:0071471,GO:0071498,GO:0090336,GO:1902219	prostaglandin biosynthetic process|peroxidase activity|prostaglandin-endoperoxide synthase activity|cytoplasm|endoplasmic reticulum membrane|inflammatory response|response to oxidative stress|regulation of blood pressure|cyclooxygenase pathway|enzyme binding|heme binding|organelle membrane|positive regulation of prostaglandin biosynthetic process|positive regulation of fever generation|positive r…	path:apla00590,path:apla04370,path:apla04625	Arachidonic acid metabolism|VEGF signaling pathway|C-type lectin receptor signaling pathway
PTPRE	132.673	87.4216	177.924	2.03524	1.0252	3.09634e-08	4.41726e-07	Up	0.568103	0.657351	0.609014	1.28558	1.04688	1.3407	GeneID:101804335	protein tyrosine phosphatase, receptor type E	GO:0005001,GO:0005634,GO:0005737,GO:0005886,GO:0006470,GO:0016021,GO:0046627	transmembrane receptor protein tyrosine phosphatase activity|nucleus|cytoplasm|plasma membrane|protein dephosphorylation|integral component of membrane|negative regulation of insulin receptor signaling pathway
PXK	3034.45	886.136	5182.77	5.84873	2.54812	2.15766e-123	5.01935e-121	Up	9.59668	10.7751	11.4124	55.1535	59.4231	56.8267	GeneID:101789868	PX domain containing serine/threonine kinase like	GO:0003779,GO:0005634,GO:0005737,GO:0005815,GO:0005829,GO:0005886,GO:0006468,GO:0006954,GO:0008022,GO:0032780,GO:0032991,GO:0035091,GO:0042391,GO:0043271,GO:0050804	actin binding|nucleus|cytoplasm|microtubule organizing center|cytosol|plasma membrane|protein phosphorylation|inflammatory response|protein C-terminus binding|negative regulation of ATPase activity|protein-containing complex|phosphatidylinositol binding|regulation of membrane potential|negative regulation of ion transport|modulation of chemical synaptic transmission
RAB40B	173.442	109.602	237.281	2.16493	1.11432	1.41238e-11	2.91428e-10	Up	4.2845	3.0691	4.23799	7.67942	7.21466	9.38823	GeneID:101799739	RAB40B, member RAS oncogene family	GO:0000139,GO:0003924,GO:0005525,GO:0005635,GO:0005886,GO:0006886,GO:0016567,GO:0032482,GO:0048471,GO:1990967	Golgi membrane|GTPase activity|GTP binding|nuclear envelope|plasma membrane|intracellular protein transport|protein ubiquitination|Rab protein signal transduction|perinuclear region of cytoplasm|multi-organism toxin transport
RAD50	3584.32	2151.97	5016.67	2.3312	1.22107	3.29479e-16	9.75785e-15	Up	10.5729	10.6686	10.5535	19.6499	23.4735	19.6601	GeneID:101800129	RAD50 double strand break repair protein	GO:0000019,GO:0000722,GO:0000784,GO:0000790,GO:0000794,GO:0003677,GO:0003690,GO:0003691,GO:0004017,GO:0005524,GO:0005634,GO:0005654,GO:0006281,GO:0006302,GO:0006310,GO:0006974,GO:0007004,GO:0007346,GO:0016233,GO:0016234,GO:0016887,GO:0030674,GO:0030870,GO:0031860,GO:0031954,GO:0032206,GO:0032508,GO:0033674,GO:0035861,GO:0043047,GO:0045120,GO:0046597,GO:0046872,GO:0048471,GO:0051276,GO:0051291,GO:…	regulation of mitotic recombination|telomere maintenance via recombination|nuclear chromosome, telomeric region|nuclear chromatin|condensed nuclear chromosome|DNA binding|double-stranded DNA binding|double-stranded telomeric DNA binding|adenylate kinase activity|ATP binding|nucleus|nucleoplasm|DNA repair|double-strand break repair|DNA recombination|cellular response to DNA damage stimulus|telomer…	path:apla03440,path:apla03450,path:apla04218	Homologous recombination|Non-homologous end-joining|Cellular senescence
RASD1	261.725	165.823	357.626	2.15668	1.10881	1.14746e-10	2.16904e-09	Up	5.50506	4.98224	5.01601	10.2072	10.7764	9.88505	GeneID:101801185	ras related dexamethasone induced 1	GO:0003924,GO:0005525,GO:0005634,GO:0005737,GO:0005886,GO:0007263,GO:0016529,GO:0045892,GO:0048471	GTPase activity|GTP binding|nucleus|cytoplasm|plasma membrane|nitric oxide mediated signal transduction|sarcoplasmic reticulum|negative regulation of transcription, DNA-templated|perinuclear region of cytoplasm
RBM43	546.364	115.412	977.317	8.46804	3.08203	1.52186e-99	3.04858e-97	Up	2.18133	2.18148	1.84986	17.2455	14.6102	14.7101	GeneID:101797333	RNA binding motif protein 43	GO:0003723	RNA binding
RBP5	288.258	180.436	396.08	2.19512	1.1343	8.87044e-16	2.57421e-14	Up	18.3933	15.5219	15.1532	49.3584	34.3003	31.254	GeneID:101796094	retinol binding protein 5	GO:0005737,GO:0016918,GO:0019841	cytoplasm|retinal binding|retinol binding
REEP6	12.5158	18.8892	6.1425	0.325187	-1.62066	0.0327802	0.102607	Down	3.10573	2.23584	0.909915	0.752745	1.09503	0.345504	GeneID:101801097	receptor accessory protein 6	GO:0005789,GO:0010842,GO:0016021,GO:0060059	endoplasmic reticulum membrane|retina layer formation|integral component of membrane|embryonic retina morphogenesis in camera-type eye
RFX8	7.2376	0.970576	13.5046	13.914	3.79847	0.000116824	0.00084849	Up	0	0.0299936	0.060293	0.196999	0.059528	0.149645	GeneID:101799474	RFX family member 8, lacking RFX DNA binding domain	GO:0000978,GO:0000981,GO:0003700,GO:0005634,GO:0006357	RNA polymerase II proximal promoter sequence-specific DNA binding|DNA-binding transcription factor activity, RNA polymerase II-specific|DNA-binding transcription factor activity|nucleus|regulation of transcription by RNA polymerase II
RILPL2	780.173	359.753	1200.59	3.33728	1.73867	3.71207e-41	3.09475e-39	Up	6.42385	6.38374	5.62011	18.2994	17.5815	18.9091	GeneID:101791778	Rab interacting lysosomal protein like 2	GO:0003382,GO:0005737,GO:0005813,GO:0005829,GO:0005929,GO:0016020,GO:0031267,GO:0036064,GO:0042802,GO:0046983,GO:0051959,GO:0060271,GO:1903445	epithelial cell morphogenesis|cytoplasm|centrosome|cytosol|cilium|membrane|small GTPase binding|ciliary basal body|identical protein binding|protein dimerization activity|dynein light intermediate chain binding|cilium assembly|protein transport from ciliary membrane to plasma membrane
RMDN3	1504.65	659.956	2349.34	3.55985	1.83182	3.77281e-67	4.38833e-65	Up	5.4035	6.1258	5.44913	16.9268	19.5584	18.0916	GeneID:101800524	regulator of microtubule dynamics 3	GO:0000922,GO:0005634,GO:0005739,GO:0005741,GO:0005874,GO:0006874,GO:0006915,GO:0016021,GO:0030154	spindle pole|nucleus|mitochondrion|mitochondrial outer membrane|microtubule|cellular calcium ion homeostasis|apoptotic process|integral component of membrane|cell differentiation
RNASEL	125.403	75.9534	174.853	2.30211	1.20296	1.00646e-05	9.33518e-05	Up	0.513926	0.718932	1.01922	1.85858	1.39321	1.40808	GeneID:101800595	ribonuclease L	GO:0003723,GO:0004521,GO:0004672,GO:0005524,GO:0005759,GO:0005829,GO:0006364,GO:0006397,GO:0006468,GO:0016363,GO:0019843,GO:0042802,GO:0043021,GO:0043488,GO:0045071,GO:0045444,GO:0045944,GO:0046872,GO:0051607,GO:0060337,GO:0060338,GO:2001275	RNA binding|endoribonuclease activity|protein kinase activity|ATP binding|mitochondrial matrix|cytosol|rRNA processing|mRNA processing|protein phosphorylation|nuclear matrix|rRNA binding|identical protein binding|ribonucleoprotein complex binding|regulation of mRNA stability|negative regulation of viral genome replication|fat cell differentiation|positive regulation of transcription by RNA polyme…	path:apla04621,path:apla05164,path:apla05168	NOD-like receptor signaling pathway|Influenza A|Herpes simplex infection
RNF114	3123.46	1745.9	4501.03	2.57805	1.36628	5.21373e-93	9.64072e-91	Up	50.8301	49.6821	47.7364	124.175	121.955	125.003	GeneID:101797151	ring finger protein 114	GO:0003676,GO:0004842,GO:0005622,GO:0005634,GO:0005829,GO:0005886,GO:0007275,GO:0007283,GO:0030154,GO:0046872	nucleic acid binding|ubiquitin-protein transferase activity|intracellular|nucleus|cytosol|plasma membrane|multicellular organism development|spermatogenesis|cell differentiation|metal ion binding
RNF135	1959.8	154.44	3765.16	24.3794	4.60759	0	0	Up	2.55259	2.47201	2.39348	58.7041	59.2016	56.993	GeneID:106014788	ring finger protein 135	GO:0004842,GO:0005737,GO:0016567,GO:0032728,GO:0042802,GO:0043021,GO:0045087,GO:0045088,GO:0046872	ubiquitin-protein transferase activity|cytoplasm|protein ubiquitination|positive regulation of interferon-beta production|identical protein binding|ribonucleoprotein complex binding|innate immune response|regulation of innate immune response|metal ion binding
RNF144B	66.603	37.9822	95.2238	2.50706	1.326	3.3418e-07	4.08464e-06	Up	0.280177	0.404479	0.469214	1.07019	0.793169	0.877873	GeneID:101793521	ring finger protein 144B	GO:0000151,GO:0000209,GO:0004842,GO:0005737,GO:0005829,GO:0006511,GO:0006915,GO:0016021,GO:0031624,GO:0031966,GO:0032436,GO:0043066,GO:0046872,GO:0061630	ubiquitin ligase complex|protein polyubiquitination|ubiquitin-protein transferase activity|cytoplasm|cytosol|ubiquitin-dependent protein catabolic process|apoptotic process|integral component of membrane|ubiquitin conjugating enzyme binding|mitochondrial membrane|positive regulation of proteasomal ubiquitin-dependent protein catabolic process|negative regulation of apoptotic process|metal ion bin…
RNF19B	701.46	353.723	1049.2	2.96615	1.56859	7.44732e-49	7.11343e-47	Up	6.10921	6.11614	5.52822	18.7306	16.3663	16.7913	GeneID:101804187	ring finger protein 19B	GO:0000151,GO:0000209,GO:0002250,GO:0004842,GO:0005737,GO:0005789,GO:0005829,GO:0006511,GO:0016021,GO:0031624,GO:0032436,GO:0044194,GO:0046872,GO:0061630	ubiquitin ligase complex|protein polyubiquitination|adaptive immune response|ubiquitin-protein transferase activity|cytoplasm|endoplasmic reticulum membrane|cytosol|ubiquitin-dependent protein catabolic process|integral component of membrane|ubiquitin conjugating enzyme binding|positive regulation of proteasomal ubiquitin-dependent protein catabolic process|cytolytic granule|metal ion binding|ubi…
RNF208	161.826	221.658	101.994	0.460142	-1.11985	4.55779e-11	8.99276e-10	Down	3.42774	3.72857	3.16441	1.85116	1.76058	1.49762	GeneID:101794238	ring finger protein 208	GO:0004842,GO:0005654,GO:0005829,GO:0046872,GO:0051865	ubiquitin-protein transferase activity|nucleoplasm|cytosol|metal ion binding|protein autoubiquitination
RP9	620.886	355.902	885.87	2.48908	1.31561	9.48288e-40	7.72721e-38	Up	3.97268	3.84078	4.15427	8.01026	9.36169	8.70901	GeneID:101791032	RP9, pre-mRNA splicing factor	GO:0003723,GO:0005634,GO:0005785,GO:0005829,GO:0008380,GO:0046872,GO:0050890	RNA binding|nucleus|signal recognition particle receptor complex|cytosol|RNA splicing|metal ion binding|cognition	path:apla03040	Spliceosome
RPAIN	188.693	95.1741	282.212	2.96522	1.56814	3.76162e-22	1.5957e-20	Up	1.64562	2.04417	2.30691	5.69137	5.33453	5.68285	GeneID:101798296	RPA interacting protein	GO:0001650,GO:0005634,GO:0005737,GO:0006261,GO:0006281,GO:0006310,GO:0006606,GO:0009411,GO:0016605,GO:0044877,GO:0046872	fibrillar center|nucleus|cytoplasm|DNA-dependent DNA replication|DNA repair|DNA recombination|protein import into nucleus|response to UV|PML body|protein-containing complex binding|metal ion binding
RSAD2	16933.2	41.9342	33824.4	806.607	9.65572	0	0	Up	1.93144	1.31101	2.1754	1435.79	1326.51	1320.21	GeneID:101791352	radical S-adenosyl methionine domain containing 2	GO:0001650,GO:0003824,GO:0005741,GO:0005743,GO:0005783,GO:0005789,GO:0005811,GO:0009615,GO:0034157,GO:0034165,GO:0035710,GO:0043367,GO:0043621,GO:0045071,GO:0045087,GO:0046872,GO:0050709,GO:0051539,GO:0051607,GO:2000553	fibrillar center|catalytic activity|mitochondrial outer membrane|mitochondrial inner membrane|endoplasmic reticulum|endoplasmic reticulum membrane|lipid droplet|response to virus|positive regulation of toll-like receptor 7 signaling pathway|positive regulation of toll-like receptor 9 signaling pathway|CD4-positive, alpha-beta T cell activation|CD4-positive, alpha-beta T cell differentiation|prote…	path:apla05164	Influenza A
RXFP3	10.7793	5.5457	16.0128	2.88743	1.52979	0.0211929	0.072622	Up	0.597027	0.185474	0.240249	1.04068	1.40417	0.692637	GeneID:101802695	relaxin family peptide receptor 3	GO:0004930,GO:0004966,GO:0005886,GO:0005887,GO:0007186,GO:0007218,GO:0008528,GO:0032467	G protein-coupled receptor activity|galanin receptor activity|plasma membrane|integral component of plasma membrane|G protein-coupled receptor signaling pathway|neuropeptide signaling pathway|G protein-coupled peptide receptor activity|positive regulation of cytokinesis	path:apla04080	Neuroactive ligand-receptor interaction
SAA2	263.364	104.687	422.041	4.03147	2.01131	2.00311e-23	9.02837e-22	Up	17.6409	16.2939	18.5525	93.9275	69.9828	65.3264	GeneID:101798523	serum amyloid A2	GO:0006953,GO:0034364	acute-phase response|high-density lipoprotein particle
SAMHD1	3150.69	537.999	5763.38	10.7126	3.42124	1.97756e-162	5.70447e-160	Up	6.88827	6.54423	6.9769	64.3132	59.5477	65.9616	GeneID:101800495	SAM and HD domain containing deoxynucleoside triphosphate triphosphohydrolase 1	GO:0000724,GO:0003676,GO:0003697,GO:0003723,GO:0005525,GO:0005634,GO:0005654,GO:0005886,GO:0006203,GO:0006974,GO:0008270,GO:0008832,GO:0009264,GO:0016446,GO:0016793,GO:0032567,GO:0035861,GO:0042802,GO:0045087,GO:0045088,GO:0046061,GO:0051289,GO:0051607,GO:0060339,GO:0090501,GO:0110025	double-strand break repair via homologous recombination|nucleic acid binding|single-stranded DNA binding|RNA binding|GTP binding|nucleus|nucleoplasm|plasma membrane|dGTP catabolic process|cellular response to DNA damage stimulus|zinc ion binding|dGTPase activity|deoxyribonucleotide catabolic process|somatic hypermutation of immunoglobulin genes|triphosphoric monoester hydrolase activity|dGTP bind…
SASH3	10.49	16.9038	4.0762	0.24114	-2.05205	0.00311847	0.0148588	Down	0.236334	0.423486	0.314627	0.0661249	0.0489775	0.0479429	GeneID:101803313	SAM and SH3 domain containing 3	GO:0002639,GO:0002726,GO:0002821,GO:0005634,GO:0005737,GO:0030890,GO:0032729,GO:0032733,GO:0032743,GO:0032753,GO:0032760,GO:0042102,GO:0043372,GO:0046622,GO:0048873	positive regulation of immunoglobulin production|positive regulation of T cell cytokine production|positive regulation of adaptive immune response|nucleus|cytoplasm|positive regulation of B cell proliferation|positive regulation of interferon-gamma production|positive regulation of interleukin-10 production|positive regulation of interleukin-2 production|positive regulation of interleukin-4 produ…
SAT1	9194.3	4873.94	13514.7	2.77284	1.47136	3.58763e-17	1.11039e-15	Up	247.002	225.783	259.844	559.223	707.458	565.295	GeneID:101795318	spermidine/spermine N1-acetyltransferase 1	GO:0001525,GO:0004145,GO:0005829,GO:0008080,GO:0009447,GO:0019809,GO:0032918,GO:0042127,GO:0042802	angiogenesis|diamine N-acetyltransferase activity|cytosol|N-acetyltransferase activity|putrescine catabolic process|spermidine binding|spermidine acetylation|regulation of cell proliferation|identical protein binding	path:apla00330,path:apla04216	Arginine and proline metabolism|Ferroptosis
SCN4B	11.1882	15.9301	6.4463	0.40466	-1.30522	0.0438689	0.128974	Down	0.257248	0.248648	0.205137	0.133015	0.0704717	0.0541261	GeneID:101795249	sodium voltage-gated channel beta subunit 4	GO:0001518,GO:0005244,GO:0010765,GO:0014704,GO:0017080,GO:0031226,GO:0044325,GO:0060307,GO:0086002,GO:0086006,GO:0086016,GO:0086091,GO:2000649	voltage-gated sodium channel complex|voltage-gated ion channel activity|positive regulation of sodium ion transport|intercalated disc|sodium channel regulator activity|intrinsic component of plasma membrane|ion channel binding|regulation of ventricular cardiac muscle cell membrane repolarization|cardiac muscle cell action potential involved in contraction|voltage-gated sodium channel activity inv…	path:apla04261	Adrenergic signaling in cardiomyocytes
SCNN1D	6.58106	2.5936	10.5685	4.07483	2.02674	0.0456833	0.133352	Up	0.00628376	0	0.0437854	0.0697325	0.0805859	0.0252177	GeneID:101793369	sodium channel epithelial 1 delta subunit	GO:0001669,GO:0005737,GO:0005887,GO:0015280,GO:0016324,GO:0031514,GO:0034706,GO:0035725,GO:0050891,GO:0055078,GO:0060170	acrosomal vesicle|cytoplasm|integral component of plasma membrane|ligand-gated sodium channel activity|apical plasma membrane|motile cilium|sodium channel complex|sodium ion transmembrane transport|multicellular organismal water homeostasis|sodium ion homeostasis|ciliary membrane
SDC4	3357.82	711.974	6003.67	8.43242	3.07595	4.35599e-132	1.04711e-129	Up	17.0783	14.4399	17.5317	135.746	131.328	124.451	GeneID:101794144	syndecan 4	GO:0001843,GO:0009986,GO:0010762,GO:0016021,GO:0042130,GO:0042802,GO:0044319,GO:0060122,GO:0061098,GO:0070053,GO:0090630,GO:1902723,GO:1902725,GO:1902766,GO:1903076,GO:1903078,GO:1903543,GO:1903553	neural tube closure|cell surface|regulation of fibroblast migration|integral component of membrane|negative regulation of T cell proliferation|identical protein binding|wound healing, spreading of cells|inner ear receptor cell stereocilium organization|positive regulation of protein tyrosine kinase activity|thrombospondin receptor activity|activation of GTPase activity|negative regulation of skel…	path:apla04512,path:apla04514	ECM-receptor interaction|Cell adhesion molecules (CAMs)
SEMA3C	3098.17	1945.2	4251.15	2.18545	1.12793	3.2696e-30	1.97311e-28	Up	14.3902	13.5982	14.0584	29.5081	28.8719	27.1997	GeneID:101796296	semaphorin 3C	GO:0001755,GO:0005615,GO:0005887,GO:0030215,GO:0030335,GO:0038191,GO:0045499,GO:0048843,GO:0050919,GO:0071526	neural crest cell migration|extracellular space|integral component of plasma membrane|semaphorin receptor binding|positive regulation of cell migration|neuropilin binding|chemorepellent activity|negative regulation of axon extension involved in axon guidance|negative chemotaxis|semaphorin-plexin signaling pathway
SEMA4B	64.9698	89.6522	40.2873	0.449374	-1.15401	0.000261827	0.00173233	Down	1.96488	1.56791	2.08882	1.0296	0.69003	1.06262	GeneID:101800535	semaphorin 4B	GO:0001755,GO:0005615,GO:0005886,GO:0005887,GO:0030215,GO:0030335,GO:0038191,GO:0045499,GO:0048843,GO:0050919,GO:0071526	neural crest cell migration|extracellular space|plasma membrane|integral component of plasma membrane|semaphorin receptor binding|positive regulation of cell migration|neuropilin binding|chemorepellent activity|negative regulation of axon extension involved in axon guidance|negative chemotaxis|semaphorin-plexin signaling pathway
SEMA4D	475.705	214.008	737.402	3.44568	1.78479	4.92772e-39	3.90509e-37	Up	1.65883	2.35	1.95071	6.71767	5.99615	6.75065	GeneID:101792112	semaphorin 4D	GO:0000122,GO:0001755,GO:0001934,GO:0004888,GO:0005102,GO:0005615,GO:0005887,GO:0007162,GO:0008360,GO:0010693,GO:0014068,GO:0016020,GO:0030215,GO:0030335,GO:0031344,GO:0038023,GO:0038191,GO:0042802,GO:0043547,GO:0043931,GO:0045499,GO:0045668,GO:0048672,GO:0048814,GO:0048843,GO:0050731,GO:0050732,GO:0050772,GO:0050919,GO:0070486,GO:0071526,GO:1900220	negative regulation of transcription by RNA polymerase II|neural crest cell migration|positive regulation of protein phosphorylation|transmembrane signaling receptor activity|signaling receptor binding|extracellular space|integral component of plasma membrane|negative regulation of cell adhesion|regulation of cell shape|negative regulation of alkaline phosphatase activity|positive regulation of p…
SEMA6C	100.151	134.544	65.7583	0.488749	-1.03283	1.14316e-06	1.26441e-05	Down	2.88326	3.69249	3.38061	2.88562	1.38252	1.63479	GeneID:106019322	semaphorin 6C	GO:0001755,GO:0005615,GO:0005737,GO:0005887,GO:0007411,GO:0009986,GO:0030215,GO:0030335,GO:0030517,GO:0038191,GO:0045499,GO:0048843,GO:0050919,GO:0071526	neural crest cell migration|extracellular space|cytoplasm|integral component of plasma membrane|axon guidance|cell surface|semaphorin receptor binding|positive regulation of cell migration|negative regulation of axon extension|neuropilin binding|chemorepellent activity|negative regulation of axon extension involved in axon guidance|negative chemotaxis|semaphorin-plexin signaling pathway
SERPINB1	171.218	72.4824	269.953	3.7244	1.89701	3.9925e-28	2.21476e-26	Up	1.10568	1.25776	1.22733	4.19403	4.46646	4.20042	GeneID:101799613	serpin family B member 1	GO:0004867,GO:0005615,GO:0005737,GO:0010951	serine-type endopeptidase inhibitor activity|extracellular space|cytoplasm|negative regulation of endopeptidase activity
SERPIND1	226.18	310.844	141.516	0.455265	-1.13522	2.8925e-12	6.35953e-11	Down	3.75187	4.16078	5.00204	1.64809	1.90615	2.00315	GeneID:101798143	serpin family D member 1	GO:0004867,GO:0005615,GO:0007596,GO:0008201	serine-type endopeptidase inhibitor activity|extracellular space|blood coagulation|heparin binding
SETX	4107.02	2370.12	5843.91	2.46565	1.30197	2.14558e-91	3.91719e-89	Up	10.2292	10.3328	10.4919	23.0915	23.4999	23.4075	GeneID:101797411	senataxin	GO:0000165,GO:0000228,GO:0000781,GO:0001147,GO:0003677,GO:0003678,GO:0005524,GO:0005634,GO:0005654,GO:0005730,GO:0005737,GO:0006302,GO:0006310,GO:0006353,GO:0006369,GO:0006376,GO:0006396,GO:0006974,GO:0007283,GO:0007623,GO:0008543,GO:0010976,GO:0016604,GO:0030424,GO:0030426,GO:0033120,GO:0034599,GO:0042802,GO:0043066,GO:0043491,GO:0044344,GO:0045171,GO:0045944,GO:0060566,GO:0070301,GO:0071300,GO:…	MAPK cascade|nuclear chromosome|chromosome, telomeric region|transcription termination site sequence-specific DNA binding|DNA binding|DNA helicase activity|ATP binding|nucleus|nucleoplasm|nucleolus|cytoplasm|double-strand break repair|DNA recombination|DNA-templated transcription, termination|termination of RNA polymerase II transcription|mRNA splice site selection|RNA processing|cellular respons…
SFRP4	21.9576	35.459	8.4562	0.238478	-2.06807	1.28197e-05	0.000115851	Down	0.933369	0.752388	0.798127	0.141881	0.130574	0.340436	GeneID:101799069	secreted frizzled related protein 4	GO:0002092,GO:0005615,GO:0005634,GO:0005737,GO:0008285,GO:0009986,GO:0010628,GO:0017147,GO:0030154,GO:0030510,GO:0035567,GO:0043065,GO:0043433,GO:0045606,GO:0046329,GO:0055062,GO:0060070,GO:0060349,GO:0090090,GO:0090263,GO:1902174,GO:2000051,GO:2000119	positive regulation of receptor internalization|extracellular space|nucleus|cytoplasm|negative regulation of cell proliferation|cell surface|positive regulation of gene expression|Wnt-protein binding|cell differentiation|regulation of BMP signaling pathway|non-canonical Wnt signaling pathway|positive regulation of apoptotic process|negative regulation of DNA-binding transcription factor activity|…	path:apla04310	Wnt signaling pathway
SLC13A5	8.89844	4.21354	13.5833	3.22373	1.68873	0.0229715	0.0773204	Up	0.0238559	0.0828882	0.035704	0.14093	0.149358	0.1347	GeneID:101791465	solute carrier family 13 member 5	GO:0005886,GO:0015137,GO:0015141,GO:0015746,GO:0016021,GO:0017153	plasma membrane|citrate transmembrane transporter activity|succinate transmembrane transporter activity|citrate transport|integral component of membrane|sodium:dicarboxylate symporter activity
SLC19A2	9.37335	13.9545	4.79219	0.343416	-1.54197	0.0303706	0.0965047	Down	0.337581	0.637122	0.401647	0.0341416	0.280647	0.170161	GeneID:101789738	solute carrier family 19 member 2	GO:0005886,GO:0008517,GO:0015234,GO:0015888,GO:0016021,GO:0042723,GO:0055085,GO:0071934	plasma membrane|folic acid transmembrane transporter activity|thiamine transmembrane transporter activity|thiamine transport|integral component of membrane|thiamine-containing compound metabolic process|transmembrane transport|thiamine transmembrane transport
SLC24A2	119.791	163.325	76.2571	0.466904	-1.0988	1.66784e-06	1.78187e-05	Down	0.693242	0.920306	0.951713	0.289787	0.338907	0.43315	GeneID:101799473	solute carrier family 24 member 2	GO:0005262,GO:0005887,GO:0006874,GO:0007601,GO:0008273,GO:0015293,GO:0050896,GO:0060291,GO:0060292,GO:0070588	calcium channel activity|integral component of plasma membrane|cellular calcium ion homeostasis|visual perception|calcium, potassium:sodium antiporter activity|symporter activity|response to stimulus|long-term synaptic potentiation|long-term synaptic depression|calcium ion transmembrane transport
SLC25A29	3145.86	1720.13	4571.59	2.65771	1.41018	5.50368e-84	8.72303e-82	Up	16.8492	14.2347	14.7719	38.0861	39.5553	38.0455	GeneID:101791539	solute carrier family 25 member 29	GO:0005289,GO:0005292,GO:0005739,GO:0005743,GO:0006844,GO:0015174,GO:0015227,GO:0015822,GO:0016021,GO:0089709,GO:1903400,GO:1903401,GO:1990575	high-affinity arginine transmembrane transporter activity|high-affinity lysine transmembrane transporter activity|mitochondrion|mitochondrial inner membrane|acyl carnitine transport|basic amino acid transmembrane transporter activity|acyl carnitine transmembrane transporter activity|ornithine transport|integral component of membrane|L-histidine transmembrane transport|L-arginine transmembrane tra…
SLC25A30	216.71	61.4116	372.008	6.05762	2.59875	7.16184e-57	7.76655e-55	Up	0.632676	0.704812	0.584026	3.4663	3.72981	3.55997	GeneID:101792067	solute carrier family 25 member 30	GO:0005743,GO:0006839,GO:0008272,GO:0015116,GO:0015117,GO:0015131,GO:0015140,GO:0015141,GO:0015297,GO:0015709,GO:0015729,GO:0016021,GO:0035435,GO:0071422,GO:0071423	mitochondrial inner membrane|mitochondrial transport|sulfate transport|sulfate transmembrane transporter activity|thiosulfate transmembrane transporter activity|oxaloacetate transmembrane transporter activity|malate transmembrane transporter activity|succinate transmembrane transporter activity|antiporter activity|thiosulfate transport|oxaloacetate transport|integral component of membrane|phospha…
SLC25A47	36.3934	20.1151	52.6718	2.61853	1.38876	8.03463e-05	0.000605136	Up	0.0659857	0.121283	0.116186	0.23369	0.277792	0.231744	GeneID:101802676	solute carrier family 25 member 47	GO:0005743,GO:0006844,GO:0015227,GO:0016021	mitochondrial inner membrane|acyl carnitine transport|acyl carnitine transmembrane transporter activity|integral component of membrane
SLC25A48	76.4716	108.964	43.9795	0.403616	-1.30894	6.12648e-07	7.13173e-06	Down	1.79329	1.3668	1.40926	0.92771	0.395809	0.506472	GeneID:101797235	solute carrier family 25 member 48	GO:0005743,GO:0006844,GO:0015227,GO:0016021	mitochondrial inner membrane|acyl carnitine transport|acyl carnitine transmembrane transporter activity|integral component of membrane
SLC26A7	22.8068	3.59041	42.0231	11.7043	3.54896	1.33763e-11	2.76795e-10	Up	0.0965481	0.0472921	0.01598	0.567717	0.508298	0.734072	GeneID:101801851	solute carrier family 26 member 7	GO:0001696,GO:0005254,GO:0005737,GO:0005768,GO:0005886,GO:0006811,GO:0006820,GO:0006821,GO:0008271,GO:0008272,GO:0015106,GO:0015108,GO:0015116,GO:0015301,GO:0015701,GO:0016021,GO:0016323,GO:0019531,GO:0019532,GO:0042391,GO:0055038	gastric acid secretion|chloride channel activity|cytoplasm|endosome|plasma membrane|ion transport|anion transport|chloride transport|secondary active sulfate transmembrane transporter activity|sulfate transport|bicarbonate transmembrane transporter activity|chloride transmembrane transporter activity|sulfate transmembrane transporter activity|anion:anion antiporter activity|bicarbonate transport|…
SLC26A9	35.4367	22.0973	48.7762	2.20734	1.14231	0.00115956	0.00639307	Up	0.168934	0.130394	0.160792	0.372885	0.274158	0.353364	GeneID:101798059	solute carrier family 26 member 9	GO:0005254,GO:0005886,GO:0006811,GO:0006820,GO:0006821,GO:0008271,GO:0009986,GO:0010628,GO:0015106,GO:0015108,GO:0015116,GO:0015301,GO:0015701,GO:0016021,GO:0016324,GO:0019531,GO:0042391,GO:0051117,GO:0070062	chloride channel activity|plasma membrane|ion transport|anion transport|chloride transport|secondary active sulfate transmembrane transporter activity|cell surface|positive regulation of gene expression|bicarbonate transmembrane transporter activity|chloride transmembrane transporter activity|sulfate transmembrane transporter activity|anion:anion antiporter activity|bicarbonate transport|integral…
SLC35D2	372.065	149.522	594.608	3.97672	1.99158	1.05591e-19	3.89498e-18	Up	2.68301	2.6345	2.53863	9.62296	9.58229	8.0777	GeneID:101797603	solute carrier family 35 member D2	GO:0000139,GO:0005338,GO:0005794,GO:0006024,GO:0008643,GO:0015165,GO:0016021,GO:0018146	Golgi membrane|nucleotide-sugar transmembrane transporter activity|Golgi apparatus|glycosaminoglycan biosynthetic process|carbohydrate transport|pyrimidine nucleotide-sugar transmembrane transporter activity|integral component of membrane|keratan sulfate biosynthetic process
SLC35F3	62.9412	41.2621	84.6203	2.0508	1.03619	9.24006e-05	0.000683083	Up	0.493133	0.599123	0.544519	0.938752	1.14738	1.015	GeneID:101803717	solute carrier family 35 member F3	GO:0015888,GO:0016021	thiamine transport|integral component of membrane
SLC40A1	119.452	77.6689	161.235	2.07592	1.05375	6.57086e-08	9.01726e-07	Up	1.13823	1.32062	1.05136	2.04521	2.46959	2.54064	GeneID:101803155	solute carrier family 40 member 1	GO:0002260,GO:0003158,GO:0005381,GO:0005622,GO:0005654,GO:0005737,GO:0005829,GO:0005886,GO:0005887,GO:0006879,GO:0008021,GO:0015093,GO:0016021,GO:0016323,GO:0017046,GO:0034395,GO:0034755,GO:0042802,GO:0043066,GO:0045944,GO:0060345,GO:0060586,GO:0097689,GO:1903988	lymphocyte homeostasis|endothelium development|iron ion transmembrane transporter activity|intracellular|nucleoplasm|cytoplasm|cytosol|plasma membrane|integral component of plasma membrane|cellular iron ion homeostasis|synaptic vesicle|ferrous iron transmembrane transporter activity|integral component of membrane|basolateral plasma membrane|peptide hormone binding|regulation of transcription from…	path:apla04216	Ferroptosis
SLC4A11	55.4584	32.4538	78.463	2.41768	1.27363	7.49059e-06	7.13114e-05	Up	0.118149	0.229775	0.204722	0.378478	0.445366	0.476268	GeneID:101791893	solute carrier family 4 member 11	GO:0005272,GO:0005452,GO:0005887,GO:0006814,GO:0015106,GO:0015252,GO:0015293,GO:0015301,GO:0015701,GO:0016323,GO:0030003,GO:0042044,GO:0046713,GO:0046715,GO:0046983,GO:0051453,GO:1902600	sodium channel activity|inorganic anion exchanger activity|integral component of plasma membrane|sodium ion transport|bicarbonate transmembrane transporter activity|proton channel activity|symporter activity|anion:anion antiporter activity|bicarbonate transport|basolateral plasma membrane|cellular cation homeostasis|fluid transport|borate transport|active borate transmembrane transporter activity…
SLCO2B1	19.3073	11.0728	27.5417	2.48734	1.3146	0.00655882	0.0277007	Up	0.29539	0.149955	0.221165	0.801675	0.722154	0.401653	GeneID:101798401	solute carrier organic anion transporter family member 2B1	GO:0001889,GO:0005887,GO:0015125,GO:0015347,GO:0015721,GO:0016324,GO:0043252,GO:0071718	liver development|integral component of plasma membrane|bile acid transmembrane transporter activity|sodium-independent organic anion transmembrane transporter activity|bile acid and bile salt transport|apical plasma membrane|sodium-independent organic anion transport|sodium-independent icosanoid transport
SLCO4C1	75.8035	21.1036	130.503	6.18396	2.62853	5.52964e-23	2.43896e-21	Up	0.298306	0.253129	0.360343	1.75978	2.4077	1.72588	GeneID:101796896	solute carrier organic anion transporter family member 4C1	GO:0005887,GO:0007275,GO:0007283,GO:0015347,GO:0015711,GO:0016021,GO:0016323,GO:0030154,GO:0043252	integral component of plasma membrane|multicellular organism development|spermatogenesis|sodium-independent organic anion transmembrane transporter activity|organic anion transport|integral component of membrane|basolateral plasma membrane|cell differentiation|sodium-independent organic anion transport
SLF2	2699.39	1217.59	4181.18	3.43398	1.77988	1.58529e-144	4.08297e-142	Up	8.60791	9.1868	9.30106	27.5737	28.7244	28.9449	GeneID:101789384	SMC5-SMC6 complex localization factor 2	GO:0000785,GO:0005634,GO:0006281,GO:0006974,GO:0031334,GO:0034184,GO:0035861,GO:1990166,GO:2000781	chromatin|nucleus|DNA repair|cellular response to DNA damage stimulus|positive regulation of protein complex assembly|positive regulation of maintenance of mitotic sister chromatid cohesion|site of double-strand break|protein localization to site of double-strand break|positive regulation of double-strand break repair
SMTNL2	21.0646	31.8555	10.2736	0.322508	-1.63259	0.00047286	0.00292205	Down	0.597717	0.454564	0.616072	0.090452	0.329122	0.127163	GeneID:101795659	smoothelin like 2	GO:0005815,GO:0030036,GO:0031941	microtubule organizing center|actin cytoskeleton organization|filamentous actin
SNX3	3211.42	2111	4311.84	2.04256	1.03038	4.05147e-55	4.23437e-53	Up	43.2296	42.8865	42.4628	78.9339	79.9229	83.5681	GeneID:101789529	sorting nexin 3	GO:0005769,GO:0010008,GO:0010314,GO:0010976,GO:0015031,GO:0022615,GO:0030111,GO:0030136,GO:0032009,GO:0032266,GO:0050765,GO:0070273,GO:0080025	early endosome|endosome membrane|phosphatidylinositol-5-phosphate binding|positive regulation of neuron projection development|protein transport|protein to membrane docking|regulation of Wnt signaling pathway|clathrin-coated vesicle|early phagosome|phosphatidylinositol-3-phosphate binding|negative regulation of phagocytosis|phosphatidylinositol-4-phosphate binding|phosphatidylinositol-3,5-bisphos…	path:apla04144	Endocytosis
SOCS1	251.251	17.2458	485.256	28.1377	4.81443	1.13873e-140	2.83171e-138	Up	0.75233	0.617396	0.50738	17.7297	17.0384	17.0836	GeneID:101801940	suppressor of cytokine signaling 1			path:apla04120,path:apla04910	Ubiquitin mediated proteolysis|Insulin signaling pathway
SOX14	14.7587	3.234	26.2835	8.12725	3.02277	0.00452728	0.0202408	Up	0	0.21282	0.0291845	0.448153	0.789625	0.242888	GeneID:101795210	SRY-box 14	GO:0000122,GO:0000981,GO:0003682,GO:0005634,GO:0006355,GO:0007601,GO:0009649,GO:0030154,GO:0043565,GO:0044798,GO:0045892,GO:0046982,GO:2001222	negative regulation of transcription by RNA polymerase II|DNA-binding transcription factor activity, RNA polymerase II-specific|chromatin binding|nucleus|regulation of transcription, DNA-templated|visual perception|entrainment of circadian clock|cell differentiation|sequence-specific DNA binding|nuclear transcription factor complex|negative regulation of transcription, DNA-templated|protein heter…
SPATA13	423.896	282.512	565.28	2.00091	1.00065	8.66713e-19	3.06387e-17	Up	1.24282	1.18924	1.1793	2.34105	2.23317	2.1977	GeneID:101797308	spermatogenesis associated 13	GO:0005085,GO:0005654,GO:0005737,GO:0005829,GO:0016477,GO:0030027,GO:0030032,GO:0030175,GO:0030334,GO:0030676,GO:0032587,GO:0035023,GO:0035556,GO:0042802,GO:0046847	guanyl-nucleotide exchange factor activity|nucleoplasm|cytoplasm|cytosol|cell migration|lamellipodium|lamellipodium assembly|filopodium|regulation of cell migration|Rac guanyl-nucleotide exchange factor activity|ruffle membrane|regulation of Rho protein signal transduction|intracellular signal transduction|identical protein binding|filopodium assembly	path:apla04810	Regulation of actin cytoskeleton
SPP2	2.43593	4.87185	0	0	#NAME?	0.0112046	0.0433255	Down	0	0.0501738	0.201681	0	0	0	GeneID:101798627	secreted phosphoprotein 2	GO:0005576,GO:0046849	extracellular region|bone remodeling
STARD3NL	370.005	226.716	513.293	2.26404	1.1789	9.11967e-23	3.99796e-21	Up	10.7384	14.002	9.81185	23.7932	24.4308	25.8981	GeneID:101789563	STARD3 N-terminal like	GO:0005765,GO:0005829,GO:0006700,GO:0015485,GO:0016020,GO:0016021,GO:0031902,GO:0042803,GO:0043231,GO:0044232,GO:0099044	lysosomal membrane|cytosol|C21-steroid hormone biosynthetic process|cholesterol binding|membrane|integral component of membrane|late endosome membrane|protein homodimerization activity|intracellular membrane-bounded organelle|organelle membrane contact site|vesicle tethering to endoplasmic reticulum
STAT1	11138.8	962.619	21315	22.1427	4.46876	0	0	Up	6.52155	6.54395	6.73089	132.118	133.41	129.5	GeneID:101795022	signal transducer and activator of transcription 1	GO:0000979,GO:0000982,GO:0001937,GO:0005634,GO:0005730,GO:0005737,GO:0006919,GO:0007259,GO:0007584,GO:0008015,GO:0008284,GO:0010742,GO:0016525,GO:0032727,GO:0032869,GO:0033209,GO:0034097,GO:0042803,GO:0043124,GO:0043434,GO:0045648,GO:0045893,GO:0048661,GO:0051591,GO:0051607,GO:0060333,GO:0060337,GO:0072136,GO:0072162,GO:0072308	RNA polymerase II core promoter sequence-specific DNA binding|transcription factor activity, RNA polymerase II proximal promoter sequence-specific DNA binding|negative regulation of endothelial cell proliferation|nucleus|nucleolus|cytoplasm|activation of cysteine-type endopeptidase activity involved in apoptotic process|JAK-STAT cascade|response to nutrient|blood circulation|positive regulation o…	path:apla04217,path:apla04620,path:apla04621,path:apla04625,path:apla04933,path:apla05164,path:apla05168	Necroptosis|Toll-like receptor signaling pathway|NOD-like receptor signaling pathway|C-type lectin receptor signaling pathway|AGE-RAGE signaling pathway in diabetic complications|Influenza A|Herpes simplex infection
STOML1	177.221	81.9438	272.498	3.32543	1.73354	6.1035e-25	2.95405e-23	Up	3.66626	3.46644	3.58902	14.365	10.1052	11.3562	GeneID:101797607	stomatin like 1	GO:0005886,GO:0006869,GO:0016021,GO:0031902,GO:0045121	plasma membrane|lipid transport|integral component of membrane|late endosome membrane|membrane raft
STX17	699.908	315.229	1084.59	3.44063	1.78267	2.97645e-74	3.86751e-72	Up	7.06237	7.26766	7.31577	22.1122	20.7778	22.694	GeneID:101796262	syntaxin 17	GO:0000149,GO:0000421,GO:0005484,GO:0005739,GO:0005776,GO:0005789,GO:0005793,GO:0005829,GO:0006886,GO:0006888,GO:0006906,GO:0007030,GO:0012505,GO:0012507,GO:0016021,GO:0016240,GO:0019903,GO:0030134,GO:0030868,GO:0030897,GO:0031201,GO:0033116,GO:0034497,GO:0044233,GO:0048278,GO:0097111,GO:0097352	SNARE binding|autophagosome membrane|SNAP receptor activity|mitochondrion|autophagosome|endoplasmic reticulum membrane|endoplasmic reticulum-Golgi intermediate compartment|cytosol|intracellular protein transport|ER to Golgi vesicle-mediated transport|vesicle fusion|Golgi organization|endomembrane system|ER to Golgi transport vesicle membrane|integral component of membrane|autophagosome membrane d…	path:apla04130,path:apla04140	SNARE interactions in vesicular transport|Autophagy - animal
SUDS3	2931.17	1806.31	4056.02	2.24547	1.16702	1.70096e-31	1.06203e-29	Up	19.296	19.626	19.5802	37.9449	42.378	38.6583	GeneID:101799621	SDS3 homolog, SIN3A corepressor complex component	GO:0000122,GO:0001835,GO:0005634,GO:0005829,GO:0006915,GO:0016575,GO:0016580,GO:0016604,GO:0019899,GO:0042802,GO:0042803,GO:0042826,GO:0043065,GO:0045892,GO:0070822	negative regulation of transcription by RNA polymerase II|blastocyst hatching|nucleus|cytosol|apoptotic process|histone deacetylation|Sin3 complex|nuclear body|enzyme binding|identical protein binding|protein homodimerization activity|histone deacetylase binding|positive regulation of apoptotic process|negative regulation of transcription, DNA-templated|Sin3-type complex
SULF2	4276.49	2835.73	5717.24	2.01614	1.0116	1.13414e-25	5.73955e-24	Up	14.0015	14.3459	15.1664	28.7392	27.2153	27.2525	GeneID:101801316	sulfatase 2	GO:0001822,GO:0002063,GO:0003094,GO:0004065,GO:0005509,GO:0005539,GO:0005615,GO:0005783,GO:0005795,GO:0005886,GO:0008449,GO:0009611,GO:0009986,GO:0010575,GO:0014846,GO:0030177,GO:0030201,GO:0032836,GO:0035860,GO:0040037,GO:0048706,GO:0051216,GO:0060348,GO:0060384,GO:0090263,GO:0097421,GO:2000345	kidney development|chondrocyte development|glomerular filtration|arylsulfatase activity|calcium ion binding|glycosaminoglycan binding|extracellular space|endoplasmic reticulum|Golgi stack|plasma membrane|N-acetylglucosamine-6-sulfatase activity|response to wounding|cell surface|positive regulation of vascular endothelial growth factor production|esophagus smooth muscle contraction|positive regula…
SUSD3	112.512	32.8264	192.197	5.85496	2.54966	4.11966e-10	7.32649e-09	Up	1.2281	1.43048	0.757375	7.14756	6.4555	4.02349	GeneID:101805126	sushi domain containing 3	GO:0005886,GO:0016021	plasma membrane|integral component of membrane
TAP1	124.555	11.0479	238.061	21.548	4.42948	1.80245e-69	2.20311e-67	Up	0.504446	0.858074	0.44488	14.3005	14.5725	13.7915	GeneID:101797680	transporter 1, ATP binding cassette subfamily B member	GO:0002250,GO:0002479,GO:0005524,GO:0015031,GO:0015433,GO:0016021,GO:0042287,GO:0042626,GO:0042825,GO:0046979	adaptive immune response|antigen processing and presentation of exogenous peptide antigen via MHC class I, TAP-dependent|ATP binding|protein transport|peptide antigen-transporting ATPase activity|integral component of membrane|MHC protein binding|ATPase activity, coupled to transmembrane movement of substances|TAP complex|TAP2 binding	path:apla02010,path:apla04145,path:apla05168	ABC transporters|Phagosome|Herpes simplex infection
TAP2	123.523	18.5199	228.527	12.3395	3.62521	2.91112e-55	3.06475e-53	Up	0.350552	0.231333	0.741519	7.55172	4.56322	5.74134	GeneID:101797091	transporter 2, ATP binding cassette subfamily B member			path:apla02010,path:apla04145,path:apla05168	ABC transporters|Phagosome|Herpes simplex infection
TAPBPL	227.158	12.957	441.36	34.0634	5.09015	3.45382e-135	8.44314e-133	Up	0.039676	0.185617	0.157193	4.20747	3.99643	4.01135	GeneID:101803225	TAP binding protein like	GO:0000139,GO:0002376,GO:0002590,GO:0005789,GO:0005886,GO:0016021,GO:0044877	Golgi membrane|immune system process|negative regulation of antigen processing and presentation of peptide antigen via MHC class I|endoplasmic reticulum membrane|plasma membrane|integral component of membrane|protein-containing complex binding
TCF15	6.91485	10.7391	3.09056	0.287785	-1.79694	0.0353155	0.108651	Down	0.418805	0.887632	0.681037	0	0.541635	0.25581	GeneID:110354769	transcription factor 15	GO:0003677,GO:0005634,GO:0007275,GO:0046983	DNA binding|nucleus|multicellular organism development|protein dimerization activity
TCF21	18.9102	25.9758	11.8446	0.455986	-1.13294	0.0203402	0.0701667	Down	0.169365	0.263503	0.367407	0.142731	0.0199064	0.333477	GeneID:101802353	transcription factor 21	GO:0000122,GO:0001077,GO:0001078,GO:0001657,GO:0001658,GO:0001763,GO:0001822,GO:0001944,GO:0005634,GO:0007530,GO:0007548,GO:0009887,GO:0014707,GO:0030855,GO:0031063,GO:0032835,GO:0042826,GO:0043425,GO:0045944,GO:0046983,GO:0048286,GO:0048536,GO:0048557,GO:0048608,GO:0048732,GO:0050681,GO:0060008,GO:0060021,GO:0060425,GO:0060426,GO:0060435,GO:0060539,GO:0060541,GO:0060766,GO:0070888,GO:0072162,GO:…	negative regulation of transcription by RNA polymerase II|proximal promoter DNA-binding transcription activator activity, RNA polymerase II-specific|proximal promoter DNA-binding transcription repressor activity, RNA polymerase II-specific|ureteric bud development|branching involved in ureteric bud morphogenesis|morphogenesis of a branching structure|kidney development|vasculature development|nuc…
TDRD6	32.588	1.29387	63.8821	49.3728	5.62564	4.14001e-24	1.94499e-22	Up	0	0.0151821	0.0151939	0.374017	0.508874	0.48061	GeneID:101790836	tudor domain containing 6	GO:0005737,GO:0007275,GO:0007283,GO:0030154,GO:0033391	cytoplasm|multicellular organism development|spermatogenesis|cell differentiation|chromatoid body
TDRD7	1655.44	254.592	3056.29	12.0047	3.58553	7.29081e-299	3.00444e-296	Up	3.45486	3.53694	2.76676	38.1466	34.1363	37.4454	GeneID:101793580	tudor domain containing 7	GO:0002089,GO:0003729,GO:0005737,GO:0007283,GO:0010608,GO:0035770,GO:0070306	lens morphogenesis in camera-type eye|mRNA binding|cytoplasm|spermatogenesis|posttranscriptional regulation of gene expression|ribonucleoprotein granule|lens fiber cell differentiation
TIMP4	2229.41	543.304	3915.52	7.20688	2.84937	1.07052e-81	1.64257e-79	Up	8.53511	8.40768	9.86758	54.7993	68.1309	57.6151	GeneID:101792619	TIMP metallopeptidase inhibitor 4	GO:0002020,GO:0005615,GO:0007219,GO:0007417,GO:0008191,GO:0009725,GO:0010033,GO:0010951,GO:0030017,GO:0031012,GO:0032496,GO:0034097,GO:0042493,GO:0042698,GO:0043434,GO:0046872,GO:0051045	protease binding|extracellular space|Notch signaling pathway|central nervous system development|metalloendopeptidase inhibitor activity|response to hormone|response to organic substance|negative regulation of endopeptidase activity|sarcomere|extracellular matrix|response to lipopolysaccharide|response to cytokine|response to drug|ovulation cycle|response to peptide hormone|metal ion binding|negat…
TLR3	87.3123	17.5315	157.093	8.96064	3.1636	7.10789e-34	4.85863e-32	Up	0.287675	0.454448	0.328791	2.53398	2.43448	2.74889	GeneID:101790771	toll like receptor 3	GO:0002756,GO:0003725,GO:0004888,GO:0005769,GO:0005789,GO:0006954,GO:0010008,GO:0016021,GO:0032722,GO:0034138,GO:0043330,GO:0045087,GO:0050729,GO:0051607	MyD88-independent toll-like receptor signaling pathway|double-stranded RNA binding|transmembrane signaling receptor activity|early endosome|endoplasmic reticulum membrane|inflammatory response|endosome membrane|integral component of membrane|positive regulation of chemokine production|toll-like receptor 3 signaling pathway|response to exogenous dsRNA|innate immune response|positive regulation of …	path:apla04217,path:apla04620,path:apla05164,path:apla05168	Necroptosis|Toll-like receptor signaling pathway|Influenza A|Herpes simplex infection
TLR7	20.6581	12.347	28.9693	2.34626	1.23036	0.00858993	0.0347818	Up	0.0824868	0.10153	0.0749283	0.139879	0.269701	0.152433	GeneID:101797264	toll like receptor 7	GO:0000139,GO:0001774,GO:0001932,GO:0002224,GO:0002755,GO:0003725,GO:0003727,GO:0004888,GO:0005737,GO:0005764,GO:0005768,GO:0005783,GO:0005789,GO:0005886,GO:0006955,GO:0007249,GO:0007252,GO:0008144,GO:0008329,GO:0010008,GO:0016021,GO:0032009,GO:0032722,GO:0032755,GO:0032757,GO:0034154,GO:0034162,GO:0035197,GO:0036020,GO:0043235,GO:0045078,GO:0045087,GO:0045356,GO:0045359,GO:0045416,GO:0050729,GO:…	Golgi membrane|microglial cell activation|regulation of protein phosphorylation|toll-like receptor signaling pathway|MyD88-dependent toll-like receptor signaling pathway|double-stranded RNA binding|single-stranded RNA binding|transmembrane signaling receptor activity|cytoplasm|lysosome|endosome|endoplasmic reticulum|endoplasmic reticulum membrane|plasma membrane|immune response|I-kappaB kinase/NF…	path:apla04620,path:apla05164	Toll-like receptor signaling pathway|Influenza A
TMEM106A	34.773	9.76096	59.7851	6.12492	2.61469	1.845e-11	3.77988e-10	Up	0.302312	0.164978	0.21916	1.16	1.41767	1.12318	GeneID:101805477	transmembrane protein 106A	GO:0016021	integral component of membrane
TMEM140	123.71	11.6921	235.728	20.1613	4.33352	1.6224e-67	1.90243e-65	Up	0.226598	0.285079	0.308822	5.66714	5.2862	4.66927	GeneID:101803982	transmembrane protein 140	GO:0016021	integral component of membrane
TMEM163	11.753	6.82923	16.6768	2.44198	1.28805	0.0408632	0.121695	Up	0.29786	0.332857	0.147248	0.736898	0.821659	0.344515	GeneID:101801207	transmembrane protein 163	GO:0008270,GO:0030054,GO:0030285,GO:0031901	zinc ion binding|cell junction|integral component of synaptic vesicle membrane|early endosome membrane
TMEM173	56.7578	12.023	101.493	8.44153	3.0775	4.26488e-22	1.80388e-20	Up	0.26271	0.13446	0.307757	2.66602	2.71275	2.98932	GeneID:101799156	transmembrane protein 173	GO:0002218,GO:0002230,GO:0005737,GO:0005741,GO:0005789,GO:0005886,GO:0006915,GO:0016021,GO:0032481,GO:0032608,GO:0035438,GO:0042803,GO:0045087,GO:0048471,GO:0051607,GO:0061507,GO:0071360	activation of innate immune response|positive regulation of defense response to virus by host|cytoplasm|mitochondrial outer membrane|endoplasmic reticulum membrane|plasma membrane|apoptotic process|integral component of membrane|positive regulation of type I interferon production|interferon-beta production|cyclic-di-GMP binding|protein homodimerization activity|innate immune response|perinuclear …	path:apla04621,path:apla04622,path:apla04623,path:apla05168	NOD-like receptor signaling pathway|RIG-I-like receptor signaling pathway|Cytosolic DNA-sensing pathway|Herpes simplex infection
TMEM51	155.42	95.2217	215.618	2.26438	1.17911	1.04211e-11	2.17201e-10	Up	1.01444	1.00276	1.22084	2.89352	2.07701	2.40216	GeneID:101790274	transmembrane protein 51	GO:0016021	integral component of membrane
TMPRSS15	8.97648	1.29836	16.6546	12.8274	3.68116	2.23235e-05	0.000189842	Up	0.0107832	0.0105012	0.0106633	0.0548709	0.12688	0.160265	GeneID:101801915	transmembrane serine protease 15	GO:0004252,GO:0005044,GO:0016020,GO:0016021	serine-type endopeptidase activity|scavenger receptor activity|membrane|integral component of membrane
TMPRSS6	2.87657	0.328125	5.42502	16.5334	4.04731	0.0198678	0.0688831	Up	0.0150133	0	0	0.125314	0.04734	0	GeneID:101792037	transmembrane serine protease 6	GO:0000122,GO:0001525,GO:0004222,GO:0004252,GO:0005615,GO:0005622,GO:0005886,GO:0006508,GO:0006879,GO:0016021,GO:0022617,GO:0030198,GO:0030514,GO:0030574,GO:0033619,GO:0035556,GO:0042730,GO:0045892,GO:0045944,GO:0055072,GO:0097264	negative regulation of transcription by RNA polymerase II|angiogenesis|metalloendopeptidase activity|serine-type endopeptidase activity|extracellular space|intracellular|plasma membrane|proteolysis|cellular iron ion homeostasis|integral component of membrane|extracellular matrix disassembly|extracellular matrix organization|negative regulation of BMP signaling pathway|collagen catabolic process|m…
TNFAIP2	3245.07	1349.51	5140.64	3.80927	1.92952	2.69072e-119	6.16004e-117	Up	15.1414	13.7849	14.1298	53.0435	53.4357	49.8057	GeneID:101792862	TNF alpha induced protein 2	GO:0000145,GO:0000149,GO:0001525,GO:0006887,GO:0030154,GO:0051601	exocyst|SNARE binding|angiogenesis|exocytosis|cell differentiation|exocyst localization
TNFAIP3	1489.45	756.918	2221.99	2.93557	1.55364	9.58494e-89	1.6859e-86	Up	9.13837	8.47461	7.64143	24.3696	23.9395	23.7038	GeneID:101796300	TNF alpha induced protein 3	GO:0001922,GO:0002020,GO:0002237,GO:0002315,GO:0002632,GO:0002634,GO:0002637,GO:0002677,GO:0003677,GO:0004842,GO:0004843,GO:0005634,GO:0005737,GO:0005764,GO:0006915,GO:0006954,GO:0007010,GO:0008270,GO:0009611,GO:0010507,GO:0016477,GO:0016579,GO:0019900,GO:0030177,GO:0031397,GO:0032088,GO:0032495,GO:0032691,GO:0032703,GO:0032715,GO:0032720,GO:0034115,GO:0034140,GO:0034148,GO:0035523,GO:0035871,GO:…	B-1 B cell homeostasis|protease binding|response to molecule of bacterial origin|marginal zone B cell differentiation|negative regulation of granuloma formation|regulation of germinal center formation|regulation of immunoglobulin production|negative regulation of chronic inflammatory response|DNA binding|ubiquitin-protein transferase activity|thiol-dependent ubiquitin-specific protease activity|n…	path:apla04217,path:apla04621	Necroptosis|NOD-like receptor signaling pathway
TNFAIP8L3	373.2	238.555	507.846	2.12884	1.09007	5.75862e-20	2.16293e-18	Up	3.81236	3.915	3.66823	7.90358	7.5306	7.32184	GeneID:101791373	TNF alpha induced protein 8 like 3	GO:0005654,GO:0005737,GO:0005829,GO:0005886,GO:0006644,GO:0008526,GO:0015914,GO:0019216,GO:0035091,GO:0042981,GO:0043552,GO:0048017,GO:0051897,GO:0070374	nucleoplasm|cytoplasm|cytosol|plasma membrane|phospholipid metabolic process|phosphatidylinositol transporter activity|phospholipid transport|regulation of lipid metabolic process|phosphatidylinositol binding|regulation of apoptotic process|positive regulation of phosphatidylinositol 3-kinase activity|inositol lipid-mediated signaling|positive regulation of protein kinase B signaling|positive reg…
TNFRSF4	437.313	127.593	747.032	5.85479	2.54962	1.70711e-48	1.61985e-46	Up	1.28194	2.08145	2.11636	10.1207	11.2981	9.27865	GeneID:101791961	TNF receptor superfamily member 4	GO:0005031,GO:0005886,GO:0006954,GO:0006968,GO:0009897,GO:0009986,GO:0016021,GO:0030890,GO:0042098,GO:0042981,GO:0043433,GO:0045859,GO:0045892,GO:0050710,GO:0051024,GO:0070236,GO:2001237	tumor necrosis factor-activated receptor activity|plasma membrane|inflammatory response|cellular defense response|external side of plasma membrane|cell surface|integral component of membrane|positive regulation of B cell proliferation|T cell proliferation|regulation of apoptotic process|negative regulation of DNA-binding transcription factor activity|regulation of protein kinase activity|negative…	path:apla04060	Cytokine-cytokine receptor interaction
TNFRSF8	45.1766	29.8891	60.464	2.02294	1.01646	0.00110774	0.00613556	Up	0.182915	0.188826	0.195853	0.324639	0.384319	0.367547	GeneID:101790154	TNF receptor superfamily member 8			path:apla04060	Cytokine-cytokine receptor interaction
TNFSF10	890.479	310.044	1470.91	4.74421	2.24617	3.85887e-76	5.45651e-74	Up	5.19973	5.25434	5.20876	24.7043	23.369	21.3768	GeneID:101797713	TNF superfamily member 10			path:apla04060,path:apla04068,path:apla04210,path:apla04217,path:apla05164	Cytokine-cytokine receptor interaction|FoxO signaling pathway|Apoptosis|Necroptosis|Influenza A
TNFSF4	112.12	6.83923	217.401	31.7874	4.99038	1.87069e-70	2.36676e-68	Up	0.133309	0.0801811	0.0666474	3.06716	2.55372	2.77017	GeneID:113844283	TNF superfamily member 4			path:apla04060	Cytokine-cytokine receptor interaction
TNFSF8	13.3073	18.8374	7.77731	0.412865	-1.27626	0.0307482	0.0973829	Down	0.272876	0.271851	0.436732	0.155367	0.0913472	0.146979	GeneID:101790237	TNF superfamily member 8	GO:0005102,GO:0005125,GO:0005164,GO:0005615,GO:0005886,GO:0005887,GO:0006915,GO:0006955,GO:0007165,GO:0007267,GO:0008283,GO:0033209,GO:0043374,GO:0045944,GO:0050830	signaling receptor binding|cytokine activity|tumor necrosis factor receptor binding|extracellular space|plasma membrane|integral component of plasma membrane|apoptotic process|immune response|signal transduction|cell-cell signaling|cell proliferation|tumor necrosis factor-mediated signaling pathway|CD8-positive, alpha-beta T cell differentiation|positive regulation of transcription by RNA polymer…	path:apla04060	Cytokine-cytokine receptor interaction
TNIP2	879.165	341.678	1416.65	4.14615	2.05177	1.36896e-39	1.10924e-37	Up	4.78018	4.11005	4.86126	17.0982	18.1699	15.7597	GeneID:101795709	TNFAIP3 interacting protein 2	GO:0005634,GO:0005654,GO:0005829,GO:0006915,GO:0006954,GO:0007249,GO:0016579,GO:0019901,GO:0023035,GO:0031593,GO:0034134,GO:0034138,GO:0034162,GO:0043032,GO:0043123,GO:0045944,GO:0046872,GO:0050821,GO:0050871,GO:0051403,GO:0070498,GO:0070530,GO:0071222,GO:2000352	nucleus|nucleoplasm|cytosol|apoptotic process|inflammatory response|I-kappaB kinase/NF-kappaB signaling|protein deubiquitination|protein kinase binding|CD40 signaling pathway|polyubiquitin modification-dependent protein binding|toll-like receptor 2 signaling pathway|toll-like receptor 3 signaling pathway|toll-like receptor 9 signaling pathway|positive regulation of macrophage activation|positive …
TNIP3	315.865	181.662	450.068	2.4775	1.30889	2.2153e-24	1.05799e-22	Up	2.23189	2.19691	2.33993	5.08736	4.7292	5.89551	GeneID:101796085	TNFAIP3 interacting protein 3	GO:0002756,GO:0005829,GO:0006954,GO:0016579,GO:0031593,GO:0034142,GO:0043124,GO:0071222	MyD88-independent toll-like receptor signaling pathway|cytosol|inflammatory response|protein deubiquitination|polyubiquitin modification-dependent protein binding|toll-like receptor 4 signaling pathway|negative regulation of I-kappaB kinase/NF-kappaB signaling|cellular response to lipopolysaccharide
TNMD	185.447	253.557	117.336	0.46276	-1.11166	4.32553e-12	9.24254e-11	Down	5.7851	5.58516	4.85356	2.7856	2.25886	2.70387	GeneID:101789654	tenomodulin	GO:0001886,GO:0001937,GO:0005635,GO:0005737,GO:0016021,GO:0016525,GO:0035990,GO:0071773	endothelial cell morphogenesis|negative regulation of endothelial cell proliferation|nuclear envelope|cytoplasm|integral component of membrane|negative regulation of angiogenesis|tendon cell differentiation|cellular response to BMP stimulus
TNXB	8.18483	13.6512	2.71845	0.199136	-2.32817	0.00400992	0.0183225	Down	0.0588207	0.04751	0.0464721	0.0159413	0	0.00437809	GeneID:101794275	tenascin XB	GO:0005178,GO:0005201,GO:0005576,GO:0005615,GO:0005622,GO:0007155,GO:0008201,GO:0030036,GO:0030199,GO:0031012,GO:0032963,GO:0048251,GO:0062023,GO:0070062,GO:0098633	integrin binding|extracellular matrix structural constituent|extracellular region|extracellular space|intracellular|cell adhesion|heparin binding|actin cytoskeleton organization|collagen fibril organization|extracellular matrix|collagen metabolic process|elastic fiber assembly|collagen-containing extracellular matrix|extracellular exosome|collagen fibril binding	path:apla04510,path:apla04512	Focal adhesion|ECM-receptor interaction
TOR1B	1326.82	425.41	2228.23	5.23784	2.38897	3.83679e-179	1.25768e-176	Up	8.75372	9.21833	8.75539	46.9408	45.2183	45.8138	GeneID:101804546	torsin family 1 member B	GO:0005524,GO:0005635,GO:0005783,GO:0005788,GO:0006986,GO:0007029,GO:0016887,GO:0031965,GO:0051085,GO:0051260,GO:0070062,GO:0071763	ATP binding|nuclear envelope|endoplasmic reticulum|endoplasmic reticulum lumen|response to unfolded protein|endoplasmic reticulum organization|ATPase activity|nuclear membrane|chaperone cofactor-dependent protein refolding|protein homooligomerization|extracellular exosome|nuclear membrane organization
TRAF5	421.853	191.676	652.03	3.40174	1.76627	1.27267e-35	9.27057e-34	Up	1.22179	1.26783	1.35178	5.784	4.91767	4.68515	GeneID:101797384	TNF receptor associated factor 5	GO:0005164,GO:0005813,GO:0005829,GO:0006915,GO:0007165,GO:0008270,GO:0008284,GO:0009898,GO:0031625,GO:0031996,GO:0035631,GO:0042802,GO:0042981,GO:0043123,GO:0051091,GO:0051092	tumor necrosis factor receptor binding|centrosome|cytosol|apoptotic process|signal transduction|zinc ion binding|positive regulation of cell proliferation|cytoplasmic side of plasma membrane|ubiquitin protein ligase binding|thioesterase binding|CD40 receptor complex|identical protein binding|regulation of apoptotic process|positive regulation of I-kappaB kinase/NF-kappaB signaling|positive regula…	path:apla04217,path:apla04621,path:apla05168	Necroptosis|NOD-like receptor signaling pathway|Herpes simplex infection
TRANK1	7784.26	175.592	15392.9	87.663	6.4539	1.03348204128538e-311	0	Up	0.71357	0.585459	0.539326	45.2863	46.8801	44.8445	GeneID:101790872	tetratricopeptide repeat and ankyrin repeat containing 1
TRIM13	621.298	407.937	834.658	2.04605	1.03284	1.03097e-25	5.25431e-24	Up	11.5236	11.8482	11.3055	25.2942	23.2014	22.225	GeneID:101802794	tripartite motif containing 13	GO:0004842,GO:0005737,GO:0005789,GO:0008270,GO:0009653,GO:0010332,GO:0010942,GO:0016021,GO:0016239,GO:0030433,GO:0032897,GO:0043123,GO:0043161,GO:0044322,GO:0045087,GO:0051092,GO:0051865,GO:0061630,GO:0097038,GO:1902187,GO:1904380	ubiquitin-protein transferase activity|cytoplasm|endoplasmic reticulum membrane|zinc ion binding|anatomical structure morphogenesis|response to gamma radiation|positive regulation of cell death|integral component of membrane|positive regulation of macroautophagy|ubiquitin-dependent ERAD pathway|negative regulation of viral transcription|positive regulation of I-kappaB kinase/NF-kappaB signaling|p…
TRIM14	30.0894	12.9898	47.1889	3.63277	1.86107	2.65274e-06	2.74466e-05	Up	0.252609	0.315318	0.348452	1.07605	1.06421	1.19529	GeneID:101793362	tripartite motif containing 14	GO:0005737,GO:0005741,GO:0008270,GO:0032897,GO:0045087,GO:0051091,GO:0051092	cytoplasm|mitochondrial outer membrane|zinc ion binding|negative regulation of viral transcription|innate immune response|positive regulation of DNA-binding transcription factor activity|positive regulation of NF-kappaB transcription factor activity
TRIM24	825.389	549.204	1101.57	2.00577	1.00415	4.66814e-29	2.71486e-27	Up	4.94552	4.93232	5.26648	9.26902	9.24225	9.53053	GeneID:101802679	tripartite motif containing 24	GO:0002039,GO:0003682,GO:0003713,GO:0004672,GO:0004842,GO:0005634,GO:0005654,GO:0005719,GO:0005726,GO:0005737,GO:0006468,GO:0008270,GO:0008285,GO:0010628,GO:0016567,GO:0016922,GO:0030163,GO:0031647,GO:0034056,GO:0042981,GO:0043565,GO:0045892,GO:0045893,GO:0046777,GO:0055074,GO:0061630,GO:0070562,GO:0070577,GO:0071391,GO:1901796	p53 binding|chromatin binding|transcription coactivator activity|protein kinase activity|ubiquitin-protein transferase activity|nucleus|nucleoplasm|nuclear euchromatin|perichromatin fibrils|cytoplasm|protein phosphorylation|zinc ion binding|negative regulation of cell proliferation|positive regulation of gene expression|protein ubiquitination|nuclear receptor binding|protein catabolic process|reg…
TRIM25	7553.07	1085.06	14021.1	12.9219	3.69174	0	0	Up	8.49351	9.26885	8.35503	107.898	102.121	108.126	GeneID:101791574	tripartite motif containing 25	GO:0004842,GO:0005654,GO:0005737,GO:0005829,GO:0006511,GO:0006513,GO:0016604,GO:0016874,GO:0030433,GO:0033280,GO:0043123,GO:0043627,GO:0045087,GO:0046596,GO:0046597,GO:0046872,GO:0051091,GO:0051092,GO:0051607,GO:0061630,GO:1902186,GO:1902187,GO:1990830	ubiquitin-protein transferase activity|nucleoplasm|cytoplasm|cytosol|ubiquitin-dependent protein catabolic process|protein monoubiquitination|nuclear body|ligase activity|ubiquitin-dependent ERAD pathway|response to vitamin D|positive regulation of I-kappaB kinase/NF-kappaB signaling|response to estrogen|innate immune response|regulation of viral entry into host cell|negative regulation of viral …	path:apla04622,path:apla05164	RIG-I-like receptor signaling pathway|Influenza A
TRIM65	14.2089	8.76762	19.6501	2.24121	1.16428	0.0392935	0.118069	Up	0.172275	0.117583	0.258229	0.658896	0.356708	0.580584	GeneID:101798054	tripartite motif containing 65	GO:0005634,GO:0005654,GO:0005829,GO:0008270,GO:0010508	nucleus|nucleoplasm|cytosol|zinc ion binding|positive regulation of autophagy
TRPC3	38.2629	18.865	57.6609	3.0565	1.61188	3.12964e-06	3.18552e-05	Up	0.238813	0.102993	0.28173	0.369233	0.4726	0.592749	GeneID:101792759	transient receptor potential cation channel subfamily C member 3	GO:0005262,GO:0005886,GO:0005887,GO:0006816,GO:0006828,GO:0007338,GO:0007602,GO:0010524,GO:0015279,GO:0030168,GO:0033198,GO:0034703,GO:0051480,GO:0051592,GO:0070588,GO:0070679,GO:1903244	calcium channel activity|plasma membrane|integral component of plasma membrane|calcium ion transport|manganese ion transport|single fertilization|phototransduction|positive regulation of calcium ion transport into cytosol|store-operated calcium channel activity|platelet activation|response to ATP|cation channel complex|regulation of cytosolic calcium ion concentration|response to calcium ion|calc…
TSC22D3	873.156	520.349	1225.96	2.35604	1.23636	5.37655e-44	4.64347e-42	Up	20.5206	20.4458	21.0368	48.7629	44.1816	49.0264	GeneID:101802247	TSC22 domain family member 3	GO:0000981,GO:0003700,GO:0005634,GO:0005829,GO:0006355,GO:0006970,GO:0034220,GO:0070236	DNA-binding transcription factor activity, RNA polymerase II-specific|DNA-binding transcription factor activity|nucleus|cytosol|regulation of transcription, DNA-templated|response to osmotic stress|ion transmembrane transport|negative regulation of activation-induced cell death of T cells
TSHR	9.75039	4.88428	14.6165	2.99256	1.58138	0.0242062	0.080704	Up	0.0572044	0.0376065	0.0188782	0.0806434	0.0978365	0.145431	GeneID:101798978	thyroid stimulating hormone receptor	GO:0004996,GO:0005622,GO:0005886,GO:0005887,GO:0007166,GO:0007189,GO:0007190,GO:0008528,GO:0009755,GO:0016323,GO:0038023,GO:0038194,GO:0044877,GO:0045762,GO:1904588,GO:1905229	thyroid-stimulating hormone receptor activity|intracellular|plasma membrane|integral component of plasma membrane|cell surface receptor signaling pathway|adenylate cyclase-activating G protein-coupled receptor signaling pathway|activation of adenylate cyclase activity|G protein-coupled peptide receptor activity|hormone-mediated signaling pathway|basolateral plasma membrane|signaling receptor acti…	path:apla04080	Neuroactive ligand-receptor interaction
TSKU	727.63	477.77	977.49	2.04594	1.03277	2.05958e-28	1.16268e-26	Up	8.78345	9.17332	8.70503	20.0762	15.6192	17.3971	GeneID:101800644	tsukushi, small leucine rich proteoglycan	GO:0005615,GO:0010468,GO:0021540,GO:0021670,GO:0021960,GO:0030178,GO:0031012,GO:0061073	extracellular space|regulation of gene expression|corpus callosum morphogenesis|lateral ventricle development|anterior commissure morphogenesis|negative regulation of Wnt signaling pathway|extracellular matrix|ciliary body morphogenesis
TSPEAR	73.6976	45.8959	101.499	2.21152	1.14504	0.000591465	0.00355446	Up	0.706575	0.30163	0.508581	1.44906	0.728142	1.18904	GeneID:101801631	thrombospondin type laminin G domain and EAR repeats	GO:0005576,GO:0007605,GO:0009986,GO:0032420,GO:0060170	extracellular region|sensory perception of sound|cell surface|stereocilium|ciliary membrane
TTC3	3240.37	1753.01	4727.74	2.69693	1.43132	1.46666e-76	2.09442e-74	Up	8.51208	8.59814	9.06487	20.087	22.0832	21.169	GeneID:101795951	tetratricopeptide repeat domain 3	GO:0004842,GO:0005634,GO:0005730,GO:0005829,GO:0006511,GO:0046872,GO:0070936	ubiquitin-protein transferase activity|nucleus|nucleolus|cytosol|ubiquitin-dependent protein catabolic process|metal ion binding|protein K48-linked ubiquitination
TTLL10	10.2582	5.53673	14.9797	2.70551	1.4359	0.0347236	0.107251	Up	0.0485295	0.048525	0.0482144	0.261603	0.324886	0.0985979	GeneID:101790628	tubulin tyrosine ligase like 10	GO:0005524,GO:0005874,GO:0005929,GO:0005930,GO:0015630,GO:0018094,GO:0070735,GO:0070737	ATP binding|microtubule|cilium|axoneme|microtubule cytoskeleton|protein polyglycylation|protein-glycine ligase activity|protein-glycine ligase activity, elongating
TUSC1	24.0417	32.4872	15.5962	0.480072	-1.05868	0.0217193	0.0740211	Down	5.98897	9.08131	4.524	2.98675	2.33145	4.06639	GeneID:113840220	tumor suppressor candidate 1
TUT4	3798.69	2018.96	5578.42	2.76301	1.46624	3.68465e-57	4.02603e-55	Up	11.6317	10.6964	11.3129	26.7885	30.0042	27.4439	GeneID:101800973	terminal uridylyl transferase 4	GO:0000289,GO:0001556,GO:0003723,GO:0005615,GO:0005730,GO:0005737,GO:0005829,GO:0008270,GO:0010526,GO:0010586,GO:0010587,GO:0019827,GO:0031054,GO:0031123,GO:0035198,GO:0036464,GO:0050265,GO:0070062,GO:0071076,GO:1990074	nuclear-transcribed mRNA poly(A) tail shortening|oocyte maturation|RNA binding|extracellular space|nucleolus|cytoplasm|cytosol|zinc ion binding|negative regulation of transposition, RNA-mediated|miRNA metabolic process|miRNA catabolic process|stem cell population maintenance|pre-miRNA processing|RNA 3'-end processing|miRNA binding|cytoplasmic ribonucleoprotein granule|RNA uridylyltransferase acti…
UBA2	4100.18	2677.48	5522.89	2.06272	1.04455	1.1953e-46	1.10512e-44	Up	42.1327	44.2106	45.0109	75.8965	83.5844	76.5413	GeneID:101790475	ubiquitin like modifier activating enzyme 2	GO:0000287,GO:0005524,GO:0005654,GO:0005737,GO:0008134,GO:0016740,GO:0016881,GO:0016925,GO:0019948,GO:0031510,GO:0032183,GO:0044388,GO:0044390,GO:0046982	magnesium ion binding|ATP binding|nucleoplasm|cytoplasm|transcription factor binding|transferase activity|acid-amino acid ligase activity|protein sumoylation|SUMO activating enzyme activity|SUMO activating enzyme complex|SUMO binding|small protein activating enzyme binding|ubiquitin-like protein conjugating enzyme binding|protein heterodimerization activity	path:apla04120	Ubiquitin mediated proteolysis
UBE2J1	1096.55	705.595	1487.5	2.10814	1.07597	7.09774e-29	4.07852e-27	Up	16.886	16.9043	18.4524	32.3905	33.275	30.7481	GeneID:101798173	ubiquitin conjugating enzyme E2 J1	GO:0005524,GO:0005789,GO:0007286,GO:0016021,GO:0018279,GO:0030433,GO:0031625,GO:0042534,GO:0061631,GO:1904153	ATP binding|endoplasmic reticulum membrane|spermatid development|integral component of membrane|protein N-linked glycosylation via asparagine|ubiquitin-dependent ERAD pathway|ubiquitin protein ligase binding|regulation of tumor necrosis factor biosynthetic process|ubiquitin conjugating enzyme activity|negative regulation of retrograde protein transport, ER to cytosol	path:apla04120,path:apla04141	Ubiquitin mediated proteolysis|Protein processing in endoplasmic reticulum
UPP1	45.1076	21.7726	68.4426	3.14352	1.65238	2.26714e-07	2.83599e-06	Up	0.432639	0.376505	0.712446	1.6124	1.30115	1.35823	GeneID:101791376	uridine phosphorylase 1	GO:0004850,GO:0005634,GO:0005654,GO:0005737,GO:0006218,GO:0006220,GO:0009166,GO:0042149,GO:0044206,GO:0046108	uridine phosphorylase activity|nucleus|nucleoplasm|cytoplasm|uridine catabolic process|pyrimidine nucleotide metabolic process|nucleotide catabolic process|cellular response to glucose starvation|UMP salvage|uridine metabolic process	path:apla00240,path:apla00983	Pyrimidine metabolism|Drug metabolism - other enzymes
USH1C	62.575	29.6031	95.5469	3.2276	1.69046	5.39646e-10	9.51129e-09	Up	0.223829	0.148204	0.140044	0.733097	0.54823	0.666889	GeneID:101789461	USH1 protein network component harmonin
USP18	5765.77	49.3849	11482.1	232.503	7.86111	0	0	Up	0.503579	0.640692	0.629387	148.39	149.503	148.471	GeneID:101803806	ubiquitin specific peptidase 18	GO:0004197,GO:0004843,GO:0005634,GO:0005829,GO:0006511,GO:0016579,GO:0019785,GO:0031647,GO:0036459,GO:0050727,GO:0060338	cysteine-type endopeptidase activity|thiol-dependent ubiquitin-specific protease activity|nucleus|cytosol|ubiquitin-dependent protein catabolic process|protein deubiquitination|ISG15-specific protease activity|regulation of protein stability|thiol-dependent ubiquitinyl hydrolase activity|regulation of inflammatory response|regulation of type I interferon-mediated signaling pathway
USP2	47.0962	69.5786	24.6139	0.353757	-1.49917	1.70145e-06	1.81374e-05	Down	2.19073	1.81239	1.57947	1.58449	0.34131	0.931476	GeneID:106019724	ubiquitin specific peptidase 2	GO:0000122,GO:0004843,GO:0005634,GO:0005737,GO:0005813,GO:0005938,GO:0006511,GO:0007049,GO:0007517,GO:0016020,GO:0016579,GO:0030332,GO:0031625,GO:0032922,GO:0042802,GO:0043153,GO:0045475,GO:0045931,GO:0046872,GO:0048471,GO:0048512,GO:0048642,GO:0048643,GO:0050821,GO:0051926	negative regulation of transcription by RNA polymerase II|thiol-dependent ubiquitin-specific protease activity|nucleus|cytoplasm|centrosome|cell cortex|ubiquitin-dependent protein catabolic process|cell cycle|muscle organ development|membrane|protein deubiquitination|cyclin binding|ubiquitin protein ligase binding|circadian regulation of gene expression|identical protein binding|entrainment of ci…
USP25	2562.74	1368.77	3756.7	2.74457	1.45658	4.09103e-98	7.97363e-96	Up	6.75395	6.81404	6.78848	16.139	17.9196	17.6968	GeneID:101803241	ubiquitin specific peptidase 25	GO:0004197,GO:0004843,GO:0005634,GO:0005783,GO:0005829,GO:0006464,GO:0006508,GO:0006511,GO:0008233,GO:0016579,GO:0031625,GO:0031647,GO:0036459,GO:0043130,GO:0051117,GO:0070536,GO:0071108,GO:1904293,GO:1904455	cysteine-type endopeptidase activity|thiol-dependent ubiquitin-specific protease activity|nucleus|endoplasmic reticulum|cytosol|cellular protein modification process|proteolysis|ubiquitin-dependent protein catabolic process|peptidase activity|protein deubiquitination|ubiquitin protein ligase binding|regulation of protein stability|thiol-dependent ubiquitinyl hydrolase activity|ubiquitin binding|A…
VCAM1	5126.47	97.7936	10155.1	103.843	6.69825	1.17847e-203	3.9528e-201	Up	0.634545	0.658046	0.706932	61.9324	66.6766	58.821	GeneID:101791924	vascular cell adhesion molecule 1	GO:0005178,GO:0005887,GO:0007155,GO:0098609	integrin binding|integral component of plasma membrane|cell adhesion|cell-cell adhesion	path:apla04514,path:apla04933	Cell adhesion molecules (CAMs)|AGE-RAGE signaling pathway in diabetic complications
WDFY2	577.959	256.984	898.934	3.49801	1.80653	5.9398e-46	5.3211e-44	Up	5.36076	5.79145	6.4579	19.0038	21.6029	17.9992	GeneID:101798632	WD repeat and FYVE domain containing 2	GO:0001934,GO:0005769,GO:0031982,GO:0045600,GO:0046872	positive regulation of protein phosphorylation|early endosome|vesicle|positive regulation of fat cell differentiation|metal ion binding
WFDC1	195.861	125.813	265.91	2.11354	1.07966	4.65431e-12	9.88646e-11	Up	2.33699	1.94986	2.26817	4.70455	4.71931	3.83873	GeneID:101804348	WAP four-disulfide core domain 1	GO:0001558,GO:0004867,GO:0005615,GO:0050728,GO:0061045	regulation of cell growth|serine-type endopeptidase inhibitor activity|extracellular space|negative regulation of inflammatory response|negative regulation of wound healing
WNT16	65.878	91.4018	40.3542	0.441503	-1.17951	6.16985e-06	5.97634e-05	Down	2.48966	1.75442	2.28515	1.02053	0.793881	0.952887	GeneID:101795639	Wnt family member 16	GO:0003408,GO:0005109,GO:0005576,GO:0005615,GO:0005737,GO:0010628,GO:0014068,GO:0016055,GO:0030182,GO:0030216,GO:0043616,GO:0045165,GO:0046330,GO:0046849,GO:0060317,GO:0060548,GO:0090399,GO:0090403	optic cup formation involved in camera-type eye development|frizzled binding|extracellular region|extracellular space|cytoplasm|positive regulation of gene expression|positive regulation of phosphatidylinositol 3-kinase signaling|Wnt signaling pathway|neuron differentiation|keratinocyte differentiation|keratinocyte proliferation|cell fate commitment|positive regulation of JNK cascade|bone remodel…	path:apla04150,path:apla04310,path:apla04916	mTOR signaling pathway|Wnt signaling pathway|Melanogenesis
WNT2B	195.088	288.348	101.827	0.353139	-1.50169	3.50837e-15	9.74975e-14	Down	2.05056	1.85788	2.27832	1.03131	0.490872	0.83174	GeneID:101800865	Wnt family member 2B	GO:0002011,GO:0002088,GO:0003407,GO:0005109,GO:0005615,GO:0008283,GO:0010842,GO:0016055,GO:0030182,GO:0035115,GO:0045165,GO:0045665,GO:0045686,GO:0045743,GO:0060070,GO:0060173,GO:0060219,GO:0060828,GO:0060900,GO:0061072,GO:0061303,GO:0090270,GO:0090271	morphogenesis of an epithelial sheet|lens development in camera-type eye|neural retina development|frizzled binding|extracellular space|cell proliferation|retina layer formation|Wnt signaling pathway|neuron differentiation|embryonic forelimb morphogenesis|cell fate commitment|negative regulation of neuron differentiation|negative regulation of glial cell differentiation|positive regulation of fib…	path:apla04150,path:apla04310,path:apla04916	mTOR signaling pathway|Wnt signaling pathway|Melanogenesis
ZC3H7B	1928.68	1179.6	2677.76	2.27006	1.18273	1.23065e-33	8.33318e-32	Up	6.37686	6.63176	6.72594	15.0704	13.4852	12.9584	GeneID:101795491	zinc finger CCCH-type containing 7B	GO:0003723,GO:0005634,GO:0010608,GO:0016032,GO:0035196,GO:0035198,GO:0046872	RNA binding|nucleus|posttranscriptional regulation of gene expression|viral process|production of miRNAs involved in gene silencing by miRNA|miRNA binding|metal ion binding
ZCCHC2	2114.1	1032.11	3196.09	3.09665	1.63071	5.1877e-96	9.9763e-94	Up	9.1008	7.98537	7.61634	23.704	25.0414	25.1832	GeneID:101796374	zinc finger CCHC-type containing 2	GO:0003676,GO:0005737,GO:0008270,GO:0035091	nucleic acid binding|cytoplasm|zinc ion binding|phosphatidylinositol binding
ZDHHC20	69.1911	42.2285	96.1537	2.27699	1.18712	3.05113e-06	3.11e-05	Up	3.04321	3.92156	3.91982	6.38861	9.03984	9.11695	GeneID:101792807	zinc finger DHHC-type containing 20	GO:0005783,GO:0005794,GO:0005886,GO:0006612,GO:0008270,GO:0018230,GO:0019706,GO:0030173,GO:0048471	endoplasmic reticulum|Golgi apparatus|plasma membrane|protein targeting to membrane|zinc ion binding|peptidyl-L-cysteine S-palmitoylation|protein-cysteine S-palmitoyltransferase activity|integral component of Golgi membrane|perinuclear region of cytoplasm
ZNFX1	7113.12	618.735	13607.5	21.9925	4.45894	0	0	Up	3.48108	3.82011	3.35085	71.4516	68.5422	67.9642	GeneID:101792842	zinc finger NFX1-type containing 1	GO:0000775,GO:0000981,GO:0003723,GO:0005634,GO:0008270,GO:0030702,GO:0031048,GO:0031380	chromosome, centromeric region|DNA-binding transcription factor activity, RNA polymerase II-specific|RNA binding|nucleus|zinc ion binding|chromatin silencing at centromere|chromatin silencing by small RNA|nuclear RNA-directed RNA polymerase complex

## Sheet: DEGs-24h
gene_id	baseMean	baseMean_control_24h_Con	baseMean_case_24h_DTMUV	foldChange	log2FoldChange	pval	padj	up_down	expression_Sample_24h_C_1	expression_Sample_24h_C_2	expression_Sample_24h_C_3	expression_Sample_24h_V_1	expression_Sample_24h_V_2	expression_Sample_24h_V_3	gene_Dbxref	description	GO_id	GO_term	pathway	pathway_description
A4GALT	39.8819	54.1584	25.6054	0.472788	-1.08074	0.00131877	0.00456894	Down	0.479463	0.484712	0.483362	0.223377	0.134266	0.22048	GeneID:101791613	alpha 1,4-galactosyltransferase (P blood group)	GO:0000139,GO:0006486,GO:0006629,GO:0008378,GO:0016021,GO:0050512	Golgi membrane|protein glycosylation|lipid metabolic process|galactosyltransferase activity|integral component of membrane|lactosylceramide 4-alpha-galactosyltransferase activity	path:apla00601,path:apla00603	Glycosphingolipid biosynthesis - lacto and neolacto series|Glycosphingolipid biosynthesis - globo and isoglobo series
ABCB9	155.713	102.246	209.181	2.04587	1.03271	0.00201806	0.00672424	Up	1.22966	1.12323	0.849467	2.71286	1.62766	1.96928	GeneID:101792371	ATP binding cassette subfamily B member 9			path:apla02010,path:apla04142	ABC transporters|Lysosome
ABCC9	1441.77	916.956	1966.58	2.14469	1.10077	3.20765e-43	8.57409e-42	Up	3.89643	4.14918	4.49308	8.08523	7.68712	7.9726	GeneID:101795664	ATP binding cassette subfamily C member 9			path:apla02010	ABC transporters
ABHD3	38.8835	23.3056	54.4615	2.33684	1.22456	0.00193362	0.00646224	Up	0.292744	0.119499	0.166797	0.473198	0.293533	0.350479	GeneID:101801886	abhydrolase domain containing 3	GO:0004623,GO:0008970,GO:0016021,GO:0016298,GO:0034338,GO:0044255,GO:0046470,GO:0047372,GO:0051792,GO:0051793,GO:0052739,GO:0052740,GO:0102567,GO:0102568	phospholipase A2 activity|phospholipase A1 activity|integral component of membrane|lipase activity|short-chain carboxylesterase activity|cellular lipid metabolic process|phosphatidylcholine metabolic process|acylglycerol lipase activity|medium-chain fatty acid biosynthetic process|medium-chain fatty acid catabolic process|phosphatidylserine 1-acylhydrolase activity|1-acyl-2-lysophosphatidylserine…
ABLIM3	90.3762	137.878	42.8747	0.310961	-1.68519	3.7424e-13	3.52566e-12	Down	0.469133	0.575425	0.55652	0.142615	0.132963	0.160864	GeneID:101804679	actin binding LIM protein family member 3	GO:0001725,GO:0005737,GO:0006351,GO:0015629,GO:0030027,GO:0030032,GO:0030036,GO:0045944,GO:0046872,GO:0051015,GO:0060271,GO:0098978,GO:1903955	stress fiber|cytoplasm|transcription, DNA-templated|actin cytoskeleton|lamellipodium|lamellipodium assembly|actin cytoskeleton organization|positive regulation of transcription by RNA polymerase II|metal ion binding|actin filament binding|cilium assembly|glutamatergic synapse|positive regulation of protein targeting to mitochondrion
ABRA	30.5406	6.66538	54.4158	8.16395	3.02927	3.14907e-12	2.82849e-11	Up	0.0352497	0.135579	0.0603036	0.561347	0.549456	0.739849	GeneID:101796057	actin binding Rho activating protein	GO:0000060,GO:0003779,GO:0005886,GO:0015629,GO:0030017,GO:0035025,GO:0045893,GO:0045944,GO:0051091	protein import into nucleus, translocation|actin binding|plasma membrane|actin cytoskeleton|sarcomere|positive regulation of Rho protein signal transduction|positive regulation of transcription, DNA-templated|positive regulation of transcription by RNA polymerase II|positive regulation of DNA-binding transcription factor activity
ACBD4	34.381	46.2057	22.5562	0.48817	-1.03454	0.00414782	0.0128413	Down	4.09956	3.23918	3.18231	1.60285	0.939235	1.1027	GeneID:113840024	acyl-CoA binding domain containing 4	GO:0000062,GO:0008289	fatty-acyl-CoA binding|lipid binding
ACBD7	43.0306	60.5475	25.5137	0.421384	-1.24679	0.00102864	0.00364855	Down	3.81995	3.97147	4.75886	0.782589	2.33068	1.14028	GeneID:101793396	acyl-CoA binding domain containing 7	GO:0000062,GO:0005783,GO:0005794,GO:0008289	fatty-acyl-CoA binding|endoplasmic reticulum|Golgi apparatus|lipid binding
ACKR2	277.62	56.37	498.871	8.84993	3.14567	1.60128e-92	9.33713e-91	Up	0.945908	0.946543	0.822989	7.30662	6.61528	8.14849	GeneID:101797665	atypical chemokine receptor 2	GO:0004950,GO:0005044,GO:0005654,GO:0005769,GO:0005829,GO:0005884,GO:0005886,GO:0005887,GO:0006935,GO:0006954,GO:0006955,GO:0007186,GO:0007204,GO:0007275,GO:0009897,GO:0016493,GO:0019722,GO:0019956,GO:0019957,GO:0031965,GO:0043231,GO:0055037,GO:0060326	chemokine receptor activity|scavenger receptor activity|nucleoplasm|early endosome|cytosol|actin filament|plasma membrane|integral component of plasma membrane|chemotaxis|inflammatory response|immune response|G protein-coupled receptor signaling pathway|positive regulation of cytosolic calcium ion concentration|multicellular organism development|external side of plasma membrane|C-C chemokine rece…
ACKR4	1466.68	412.906	2520.45	6.10417	2.6098	6.60787e-82	3.36466e-80	Up	7.28832	6.67275	6.07427	36.1349	38.0269	39.8088	GeneID:101804100	atypical chemokine receptor 4	GO:0004950,GO:0005044,GO:0005769,GO:0006935,GO:0006955,GO:0007204,GO:0009897,GO:0016021,GO:0016493,GO:0019722,GO:0019956,GO:0019957,GO:0055037,GO:0060326	chemokine receptor activity|scavenger receptor activity|early endosome|chemotaxis|immune response|positive regulation of cytosolic calcium ion concentration|external side of plasma membrane|integral component of membrane|C-C chemokine receptor activity|calcium-mediated signaling|chemokine binding|C-C chemokine binding|recycling endosome|cell chemotaxis	path:apla04060	Cytokine-cytokine receptor interaction
ACOT7	549.613	252.08	847.145	3.36061	1.74872	4.0409e-61	1.52176e-59	Up	9.50647	10.7396	9.13782	29.9388	29.171	32.0131	GeneID:101789631	acyl-CoA thioesterase 7	GO:0000062,GO:0005654,GO:0005829,GO:0006637,GO:0009062,GO:0015937,GO:0016290,GO:0036042,GO:0036114,GO:0036116,GO:0042802,GO:0042803,GO:0043005,GO:0044297,GO:0047617,GO:0051792,GO:0052689,GO:0102991,GO:1900535	fatty-acyl-CoA binding|nucleoplasm|cytosol|acyl-CoA metabolic process|fatty acid catabolic process|coenzyme A biosynthetic process|palmitoyl-CoA hydrolase activity|long-chain fatty acyl-CoA binding|medium-chain fatty-acyl-CoA catabolic process|long-chain fatty-acyl-CoA catabolic process|identical protein binding|protein homodimerization activity|neuron projection|cell body|acyl-CoA hydrolase acti…	path:apla00062,path:apla01040	Fatty acid elongation|Biosynthesis of unsaturated fatty acids
ACSL4	2778.33	1722.95	3833.71	2.22509	1.15386	1.52523e-67	6.37468e-66	Up	16.4529	16.3211	16.8815	34.0828	33.4451	33.0842	GeneID:101798003	acyl-CoA synthetase long chain family member 4	GO:0004467,GO:0005524,GO:0005737,GO:0005739,GO:0005741,GO:0005777,GO:0005778,GO:0005789,GO:0005811,GO:0006629,GO:0007584,GO:0008610,GO:0015908,GO:0016021,GO:0019217,GO:0019432,GO:0030182,GO:0030307,GO:0031957,GO:0031966,GO:0032307,GO:0035338,GO:0043025,GO:0044233,GO:0047676,GO:0060136,GO:0060996,GO:0070672,GO:0102391	long-chain fatty acid-CoA ligase activity|ATP binding|cytoplasm|mitochondrion|mitochondrial outer membrane|peroxisome|peroxisomal membrane|endoplasmic reticulum membrane|lipid droplet|lipid metabolic process|response to nutrient|lipid biosynthetic process|fatty acid transport|integral component of membrane|regulation of fatty acid metabolic process|triglyceride biosynthetic process|neuron differe…	path:apla00061,path:apla00071,path:apla03320,path:apla04146,path:apla04216,path:apla04920	Fatty acid biosynthesis|Fatty acid degradation|PPAR signaling pathway|Peroxisome|Ferroptosis|Adipocytokine signaling pathway
ACSL5	4.98073	8.92262	1.03884	0.116428	-3.10249	0.00739938	0.0215557	Down	0.164044	0.11636	0.0640099	0	0.0128438	0	GeneID:101801834	acyl-CoA synthetase long chain family member 5	GO:0004467,GO:0005524,GO:0005739,GO:0005741,GO:0005789,GO:0006631,GO:0007584,GO:0008654,GO:0009744,GO:0009749,GO:0010747,GO:0010867,GO:0015908,GO:0016021,GO:0032000,GO:0032869,GO:0035338,GO:0070723,GO:0102391	long-chain fatty acid-CoA ligase activity|ATP binding|mitochondrion|mitochondrial outer membrane|endoplasmic reticulum membrane|fatty acid metabolic process|response to nutrient|phospholipid biosynthetic process|response to sucrose|response to glucose|positive regulation of plasma membrane long-chain fatty acid transport|positive regulation of triglyceride biosynthetic process|fatty acid transpor…	path:apla00061,path:apla00071,path:apla03320,path:apla04146,path:apla04216,path:apla04920	Fatty acid biosynthesis|Fatty acid degradation|PPAR signaling pathway|Peroxisome|Ferroptosis|Adipocytokine signaling pathway
ACSL6	276.827	405.309	148.345	0.366004	-1.45007	5.82091e-26	9.79932e-25	Down	3.14525	2.77827	3.05185	1.00067	0.838306	1.07186	GeneID:101790201	acyl-CoA synthetase long chain family member 6	GO:0001676,GO:0004467,GO:0005524,GO:0005741,GO:0005778,GO:0005789,GO:0005886,GO:0006637,GO:0007405,GO:0016020,GO:0016021,GO:0019899,GO:0035338,GO:0042803,GO:0102391	long-chain fatty acid metabolic process|long-chain fatty acid-CoA ligase activity|ATP binding|mitochondrial outer membrane|peroxisomal membrane|endoplasmic reticulum membrane|plasma membrane|acyl-CoA metabolic process|neuroblast proliferation|membrane|integral component of membrane|enzyme binding|long-chain fatty-acyl-CoA biosynthetic process|protein homodimerization activity|decanoate-CoA ligase…	path:apla00061,path:apla00071,path:apla03320,path:apla04146,path:apla04216,path:apla04920	Fatty acid biosynthesis|Fatty acid degradation|PPAR signaling pathway|Peroxisome|Ferroptosis|Adipocytokine signaling pathway
ADAM22	151.483	202.021	100.945	0.499676	-1.00094	1.48739e-08	1.01554e-07	Down	0.94194	0.838766	0.916303	0.437492	0.551567	0.331497	GeneID:101794671	ADAM metallopeptidase domain 22	GO:0004222,GO:0005886,GO:0016021	metalloendopeptidase activity|plasma membrane|integral component of membrane
ADAMTS10	541.429	745.592	337.266	0.452347	-1.1445	1.60049e-18	2.05184e-17	Down	5.69262	5.33273	4.62083	2.134	2.1086	2.2386	GeneID:101799212	ADAM metallopeptidase with thrombospondin type 1 motif 10	GO:0001527,GO:0004222,GO:0046872,GO:0062023	microfibril|metalloendopeptidase activity|metal ion binding|collagen-containing extracellular matrix
ADAMTS15	716.036	956.885	475.187	0.496597	-1.00985	4.69699e-27	8.20328e-26	Down	10.1443	10.7245	9.87489	4.84661	4.51156	4.95964	GeneID:101799743	ADAM metallopeptidase with thrombospondin type 1 motif 15	GO:0004175,GO:0004222,GO:0005615,GO:0008201,GO:0008270,GO:0009986,GO:0050840,GO:0062023	endopeptidase activity|metalloendopeptidase activity|extracellular space|heparin binding|zinc ion binding|cell surface|extracellular matrix binding|collagen-containing extracellular matrix
ADAMTS20	156.557	235.624	77.4892	0.328867	-1.60442	9.38814e-11	7.63868e-10	Down	1.15017	0.878794	0.907499	0.276786	0.320223	0.275973	GeneID:101801774	ADAM metallopeptidase with thrombospondin type 1 motif 20	GO:0004175,GO:0004222,GO:0005615,GO:0006508,GO:0008270,GO:0009967,GO:0030198,GO:0043066,GO:0045636,GO:0048070	endopeptidase activity|metalloendopeptidase activity|extracellular space|proteolysis|zinc ion binding|positive regulation of signal transduction|extracellular matrix organization|negative regulation of apoptotic process|positive regulation of melanocyte differentiation|regulation of developmental pigmentation
ADAMTSL3	526.083	770.027	282.139	0.366402	-1.4485	1.37123e-26	2.34945e-25	Down	3.38185	3.00942	3.48699	1.0326	1.10481	1.05526	GeneID:101789497	ADAMTS like 3	GO:0005576,GO:0008233,GO:0043231	extracellular region|peptidase activity|intracellular membrane-bounded organelle
ADAR	2611.36	871.31	4351.42	4.99411	2.32023	5.32341e-237	8.18956e-235	Up	9.68132	9.82208	9.20192	41.7694	45.8256	45.2539	GeneID:101796198	adenosine deaminase, RNA specific	GO:0003677,GO:0003725,GO:0003726,GO:0005634,GO:0005730,GO:0005737,GO:0006382,GO:0006396,GO:0006397,GO:0008251,GO:0009615,GO:0016607,GO:0031047,GO:0035455,GO:0044387,GO:0044530,GO:0045070,GO:0045087,GO:0046872,GO:0051607	DNA binding|double-stranded RNA binding|double-stranded RNA adenosine deaminase activity|nucleus|nucleolus|cytoplasm|adenosine to inosine editing|RNA processing|mRNA processing|tRNA-specific adenosine deaminase activity|response to virus|nuclear speck|gene silencing by RNA|response to interferon-alpha|negative regulation of protein kinase activity by regulation of protein phosphorylation|supraspl…	path:apla04623,path:apla05164	Cytosolic DNA-sensing pathway|Influenza A
ADCY5	109.202	156.019	62.385	0.399856	-1.32245	1.89331e-10	1.50105e-09	Down	1.33309	1.47267	1.05457	0.385314	0.354258	0.594341	GeneID:101794067	adenylate cyclase 5	GO:0001973,GO:0003091,GO:0004016,GO:0005524,GO:0005886,GO:0005887,GO:0005929,GO:0006171,GO:0007186,GO:0007189,GO:0007191,GO:0007193,GO:0007195,GO:0007204,GO:0007626,GO:0008179,GO:0016021,GO:0045111,GO:0046872,GO:0046982,GO:0050885,GO:0061178,GO:0071377,GO:0097110,GO:1904322	adenosine receptor signaling pathway|renal water homeostasis|adenylate cyclase activity|ATP binding|plasma membrane|integral component of plasma membrane|cilium|cAMP biosynthetic process|G protein-coupled receptor signaling pathway|adenylate cyclase-activating G protein-coupled receptor signaling pathway|adenylate cyclase-activating dopamine receptor signaling pathway|adenylate cyclase-inhibiting…	path:apla00230,path:apla04114,path:apla04261,path:apla04270,path:apla04371,path:apla04540,path:apla04912,path:apla04914,path:apla04916	Purine metabolism|Oocyte meiosis|Adrenergic signaling in cardiomyocytes|Vascular smooth muscle contraction|Apelin signaling pathway|Gap junction|GnRH signaling pathway|Progesterone-mediated oocyte maturation|Melanogenesis
ADGRA1	309.3	187.064	431.536	2.30689	1.20595	1.19231e-20	1.67399e-19	Up	1.62979	1.45734	1.77522	3.35387	3.27627	3.51233	GeneID:101801764	adhesion G protein-coupled receptor A1	GO:0004930,GO:0007166,GO:0014069,GO:0016021,GO:0098978	G protein-coupled receptor activity|cell surface receptor signaling pathway|postsynaptic density|integral component of membrane|glutamatergic synapse
ADGRB1	107.574	66.5539	148.593	2.23267	1.15877	2.23226e-08	1.49795e-07	Up	0.328241	0.322441	0.320748	0.800345	0.639578	0.587903	GeneID:101790518	adhesion G protein-coupled receptor B1	GO:0001530,GO:0001786,GO:0001891,GO:0004888,GO:0004930,GO:0005615,GO:0005886,GO:0005887,GO:0005925,GO:0006910,GO:0006911,GO:0007166,GO:0007189,GO:0007399,GO:0007517,GO:0010596,GO:0014069,GO:0016525,GO:0030165,GO:0030425,GO:0031397,GO:0042177,GO:0043197,GO:0043277,GO:0043652,GO:0045087,GO:0048167,GO:0048471,GO:0050829,GO:0051963,GO:0051965,GO:0098974,GO:0098978,GO:0099055,GO:1901741,GO:1903428	lipopolysaccharide binding|phosphatidylserine binding|phagocytic cup|transmembrane signaling receptor activity|G protein-coupled receptor activity|extracellular space|plasma membrane|integral component of plasma membrane|focal adhesion|phagocytosis, recognition|phagocytosis, engulfment|cell surface receptor signaling pathway|adenylate cyclase-activating G protein-coupled receptor signaling pathwa…	path:apla04115	p53 signaling pathway
ADIG	29.4299	39.7938	19.0659	0.479118	-1.06155	0.00661198	0.0194896	Down	0.737295	0.881897	0.606881	0.609902	0.506923	0.336339	GeneID:106014600	adipogenin
ADIRF	146.255	198.539	93.9721	0.473319	-1.07911	1.61187e-06	8.78602e-06	Down	15.916	13.6034	12.9038	7.46645	5.21942	6.40563	GeneID:113843953	adipogenesis regulatory factor
ADORA2B	526.987	293.937	760.037	2.58571	1.37056	4.47943e-27	7.84226e-26	Up	3.64376	3.95202	3.98108	9.82342	9.40532	9.35917	GeneID:101800579	adenosine A2b receptor	GO:0001609,GO:0002882,GO:0005622,GO:0005886,GO:0007189,GO:0010575,GO:0010753,GO:0016021,GO:0031284,GO:0031668,GO:0032722,GO:0032755,GO:0043306,GO:0060087,GO:0098685,GO:0098978,GO:2000300	G protein-coupled adenosine receptor activity|positive regulation of chronic inflammatory response to non-antigenic stimulus|intracellular|plasma membrane|adenylate cyclase-activating G protein-coupled receptor signaling pathway|positive regulation of vascular endothelial growth factor production|positive regulation of cGMP-mediated signaling|integral component of membrane|positive regulation of …	path:apla04020,path:apla04080,path:apla04270	Calcium signaling pathway|Neuroactive ligand-receptor interaction|Vascular smooth muscle contraction
ADRA2A	613.184	343.627	882.741	2.56889	1.36115	3.24445e-42	8.45368e-41	Up	6.15731	6.34192	5.63183	15.1445	15.1126	14.0145	GeneID:101803955	adrenoceptor alpha 2A	GO:0004935,GO:0004938,GO:0005622,GO:0005887,GO:0006940,GO:0007188,GO:0019229,GO:0030168,GO:0071880	adrenergic receptor activity|alpha2-adrenergic receptor activity|intracellular|integral component of plasma membrane|regulation of smooth muscle contraction|adenylate cyclase-modulating G protein-coupled receptor signaling pathway|regulation of vasoconstriction|platelet activation|adenylate cyclase-activating adrenergic receptor signaling pathway	path:apla04080	Neuroactive ligand-receptor interaction
ADRA2C	131.262	194.38	68.1444	0.350573	-1.51221	4.42651e-15	4.72063e-14	Down	1.87808	1.67264	1.70452	0.669103	0.646676	0.38014	GeneID:101790023	adrenoceptor alpha 2C	GO:0004938,GO:0005886,GO:0006940,GO:0016021,GO:0019229,GO:0030168	alpha2-adrenergic receptor activity|plasma membrane|regulation of smooth muscle contraction|integral component of membrane|regulation of vasoconstriction|platelet activation	path:apla04080	Neuroactive ligand-receptor interaction
AFF4	3160.25	1990.19	4330.31	2.17583	1.12157	7.63886e-67	3.13823e-65	Up	10.3821	9.35899	9.59156	19.6506	20.5086	18.5602	GeneID:101797005	AF4/FMR2 family member 4
AFP	22.1934	11.4668	32.92	2.87091	1.52151	0.000901937	0.00323806	Up	0.042293	0.0498198	0.0704766	0.166327	0.105686	0.0900592	GeneID:101797580	alpha fetoprotein	GO:0005615,GO:0046872	extracellular space|metal ion binding
AGBL1	12.7314	17.875	7.5878	0.424493	-1.23619	0.0442326	0.10236	Down	0.0565688	0.0261221	0.0430575	0.0116114	0.0317731	0.0169548	GeneID:101793469	ATP/GTP binding protein like 1	GO:0004181,GO:0005829,GO:0008270,GO:0015631,GO:0035609,GO:0035610	metallocarboxypeptidase activity|cytosol|zinc ion binding|tubulin binding|C-terminal protein deglutamylation|protein side chain deglutamylation
AGMAT	43.6901	27.0857	60.2946	2.22606	1.1545	0.000318532	0.00123992	Up	1.67858	1.36167	2.05467	3.678	2.79105	3.49898	GeneID:101794990	agmatinase	GO:0005739,GO:0008295,GO:0008783,GO:0033388,GO:0046872	mitochondrion|spermidine biosynthetic process|agmatinase activity|putrescine biosynthetic process from arginine|metal ion binding	path:apla00330	Arginine and proline metabolism
AGTR1	206.624	313.524	99.723	0.318071	-1.65258	1.36812e-25	2.2793e-24	Down	1.58234	1.41094	1.33287	0.470982	0.447862	0.376625	GeneID:101804939	angiotensin II receptor type 1	GO:0004945,GO:0005886,GO:0016021,GO:0019229	angiotensin type II receptor activity|plasma membrane|integral component of membrane|regulation of vasoconstriction	path:apla04020,path:apla04080,path:apla04261,path:apla04270,path:apla04371,path:apla04933	Calcium signaling pathway|Neuroactive ligand-receptor interaction|Adrenergic signaling in cardiomyocytes|Vascular smooth muscle contraction|Apelin signaling pathway|AGE-RAGE signaling pathway in diabetic complications
AIFM3	5.80291	9.87703	1.72879	0.175031	-2.51431	0.0126621	0.0345614	Down	0.173291	0.0910772	0.122038	0	0	0.0158252	GeneID:101795769	apoptosis inducing factor, mitochondria associated 3	GO:0005739,GO:0005743,GO:0005783,GO:0005829,GO:0016491,GO:0046872,GO:0050660,GO:0051537,GO:0097194	mitochondrion|mitochondrial inner membrane|endoplasmic reticulum|cytosol|oxidoreductase activity|metal ion binding|flavin adenine dinucleotide binding|2 iron, 2 sulfur cluster binding|execution phase of apoptosis
AJM1	16.1948	24.4695	7.9202	0.323677	-1.62737	0.00865973	0.0247879	Down	0.203354	0.358485	0.20299	0.0402398	0.132542	0.0727386	GeneID:101798667	apical junction component 1 homolog	GO:0005912,GO:0005929,GO:0016324,GO:0045216	adherens junction|cilium|apical plasma membrane|cell-cell junction organization
ALB	35.4552	16.3007	54.6097	3.35014	1.74422	3.48379e-06	1.83731e-05	Up	0.338905	0.0687014	0.318981	0.733283	0.865669	0.915163	GeneID:101802920	albumin	GO:0003677,GO:0005504,GO:0005615,GO:0008144,GO:0009267,GO:0009615,GO:0015643,GO:0019836,GO:0030170,GO:0032991,GO:0033189,GO:0036094,GO:0043066,GO:0046872,GO:0051659,GO:0060417	DNA binding|fatty acid binding|extracellular space|drug binding|cellular response to starvation|response to virus|toxic substance binding|hemolysis by symbiont of host erythrocytes|pyridoxal phosphate binding|protein-containing complex|response to vitamin A|small molecule binding|negative regulation of apoptotic process|metal ion binding|maintenance of mitochondrion location|yolk
ALDH1A1	53.4162	71.8117	35.0207	0.487674	-1.03601	0.0150415	0.0402581	Down	1.57595	0.614181	1.25484	0.543403	0.487638	0.667773	GeneID:101802481	aldehyde dehydrogenase 1 family member A1	GO:0001523,GO:0001758,GO:0004029,GO:0005829,GO:0018479,GO:0042572,GO:0055114	retinoid metabolic process|retinal dehydrogenase activity|aldehyde dehydrogenase (NAD) activity|cytosol|benzaldehyde dehydrogenase (NAD+) activity|retinol metabolic process|oxidation-reduction process	path:apla00830	Retinol metabolism
ALK	886.09	282.547	1489.63	5.27217	2.3984	4.65527e-139	4.23396e-137	Up	1.35675	1.33361	1.31168	6.85842	6.47442	6.06278	GeneID:101797885	ALK receptor tyrosine kinase
ALOX5	97.4234	132.527	62.3198	0.470242	-1.08852	5.4909e-07	3.16982e-06	Down	1.61211	1.74144	1.82192	0.600859	0.824085	0.775088	GeneID:101801930	arachidonate 5-lipoxygenase			path:apla00590	Arachidonic acid metabolism
ALX3	107.201	47.4767	166.924	3.51592	1.8139	2.3721e-17	2.82561e-16	Up	0.820578	0.641097	0.627361	2.32151	2.19079	2.43307	GeneID:101803959	ALX homeobox 3	GO:0003677,GO:0003700,GO:0005634,GO:0006355,GO:0007389,GO:0035115,GO:0035116,GO:0042981,GO:0043565,GO:0048701,GO:0048704	DNA binding|DNA-binding transcription factor activity|nucleus|regulation of transcription, DNA-templated|pattern specification process|embryonic forelimb morphogenesis|embryonic hindlimb morphogenesis|regulation of apoptotic process|sequence-specific DNA binding|embryonic cranial skeleton morphogenesis|embryonic skeletal system morphogenesis
AMIGO2	280.217	140.415	420.019	2.99127	1.58076	1.08002e-30	2.07965e-29	Up	2.38567	2.79164	2.45246	7.01103	7.10078	7.35836	GeneID:101790316	adhesion molecule with Ig like domain 2	GO:0005634,GO:0005886,GO:0007156,GO:0007157,GO:0016021,GO:0043066,GO:0043069,GO:0051965	nucleus|plasma membrane|homophilic cell adhesion via plasma membrane adhesion molecules|heterophilic cell-cell adhesion via plasma membrane cell adhesion molecules|integral component of membrane|negative regulation of apoptotic process|negative regulation of programmed cell death|positive regulation of synapse assembly
ANGPT1	454.546	73.597	835.496	11.3523	3.50491	2.45029e-160	2.62471e-158	Up	0.480477	0.571543	0.568369	5.01332	5.35582	4.96701	GeneID:101795228	angiopoietin 1			path:apla04010	MAPK signaling pathway
ANGPT2	203.85	285.083	122.617	0.430111	-1.21722	4.8934e-15	5.21086e-14	Down	8.24511	8.10449	8.41343	3.30947	3.30108	3.02979	GeneID:101798416	angiopoietin 2			path:apla04010	MAPK signaling pathway
ANGPT4	144.735	91.7414	197.728	2.15527	1.10787	1.10419e-06	6.13475e-06	Up	4.82044	3.52516	4.32602	8.22285	10.43	7.43371	GeneID:101792678	angiopoietin 4	GO:0001525,GO:0005576,GO:0030971	angiogenesis|extracellular region|receptor tyrosine kinase binding	path:apla04010	MAPK signaling pathway
ANGPTL4	225.099	137.877	312.321	2.26522	1.17965	3.54498e-12	3.16835e-11	Up	3.00971	3.23861	3.10286	7.18988	6.42975	6.0782	GeneID:101797549	angiopoietin like 4	GO:0001525,GO:0004857,GO:0005615,GO:0030154,GO:0042802,GO:0051005,GO:0070328,GO:2000352	angiogenesis|enzyme inhibitor activity|extracellular space|cell differentiation|identical protein binding|negative regulation of lipoprotein lipase activity|triglyceride homeostasis|negative regulation of endothelial cell apoptotic process	path:apla03320	PPAR signaling pathway
ANGPTL5	34.1001	51.9036	16.2967	0.313979	-1.67126	7.42012e-06	3.74397e-05	Down	1.02104	1.10774	0.925452	0.337508	0.234112	0.237381	GeneID:101793067	angiopoietin like 5	GO:0005576	extracellular region
ANKFN1	256.793	50.9639	462.623	9.07746	3.18229	1.16641e-75	5.53029e-74	Up	0.18633	0.1959	0.155276	1.06549	1.20861	1.23757	GeneID:101791392	ankyrin repeat and fibronectin type III domain containing 1
ANKH	1185.35	1666.9	703.797	0.422218	-1.24394	3.78088e-43	1.00877e-41	Down	29.5755	30.452	35.0846	13.5335	12.313	11.6235	GeneID:101802912	ANKH inorganic pyrophosphate transport regulator	GO:0001501,GO:0005315,GO:0005886,GO:0005887,GO:0007626,GO:0015114,GO:0016021,GO:0019867,GO:0030500,GO:0030504,GO:0055085	skeletal system development|inorganic phosphate transmembrane transporter activity|plasma membrane|integral component of plasma membrane|locomotory behavior|phosphate ion transmembrane transporter activity|integral component of membrane|outer membrane|regulation of bone mineralization|inorganic diphosphate transmembrane transporter activity|transmembrane transport
ANKRD12	1500.9	929.571	2072.22	2.22923	1.15654	1.07033e-52	3.50977e-51	Up	4.26296	4.14345	4.61836	8.7264	9.01859	8.63958	GeneID:101802980	ankyrin repeat domain 12	GO:0005654,GO:0005829	nucleoplasm|cytosol
ANKRD28	1135.98	703.655	1568.3	2.22879	1.15626	1.07533e-45	3.10386e-44	Up	5.66191	5.90877	5.75769	12.0137	11.5174	11.7333	GeneID:101798140	ankyrin repeat domain 28	GO:0000139,GO:0005654,GO:0005829,GO:0048208	Golgi membrane|nucleoplasm|cytosol|COPII vesicle coating
ANKRD33B	509.455	117.918	900.992	7.64081	2.93373	5.512e-136	4.86031e-134	Up	1.35646	1.20014	1.39206	9.19165	8.78145	9.86917	GeneID:101794598	ankyrin repeat domain 33B	GO:0003677	DNA binding
ANKRD34B	44.8916	74.9235	14.8597	0.198332	-2.33401	8.68972e-09	6.0183e-08	Down	0.623581	0.54147	0.859619	0.108027	0.127199	0.117542	GeneID:101797474	ankyrin repeat domain 34B	GO:0005634,GO:0005737	nucleus|cytoplasm
ANKRD55	25.5382	34.082	16.9945	0.498634	-1.00395	0.0167752	0.0441869	Down	0.324206	0.378899	0.49609	0.153988	0.170689	0.255391	GeneID:101793834	ankyrin repeat domain 55
ANKRD6	1545.79	220.134	2871.45	13.0441	3.70533	2.74417e-109	1.9743e-107	Up	1.3255	1.08132	1.04981	15.3684	14.1613	13.3369	GeneID:101800417	ankyrin repeat domain 6	GO:0005634,GO:0005737,GO:0043231,GO:0090090,GO:2000096	nucleus|cytoplasm|intracellular membrane-bounded organelle|negative regulation of canonical Wnt signaling pathway|positive regulation of Wnt signaling pathway, planar cell polarity pathway
ANKRD9	239.426	23.8737	454.979	19.0578	4.25231	2.32233e-43	6.24224e-42	Up	3.00744	2.94557	1.70316	36.3855	46.4128	38.6489	GeneID:101790995	ankyrin repeat domain 9	GO:0005829,GO:0016020,GO:0043194,GO:0043687,GO:0044325,GO:0072659	cytosol|membrane|axon initial segment|post-translational protein modification|ion channel binding|protein localization to plasma membrane
ANKS1B	175.043	234.53	115.556	0.492711	-1.02119	6.75682e-10	5.13185e-09	Down	1.3221	1.2867	1.52108	0.564773	0.669118	0.567301	GeneID:101800512	ankyrin repeat and sterile alpha motif domain containing 1B	GO:0014069,GO:0015030,GO:0030054,GO:0043197,GO:0045211,GO:0097120,GO:0098686,GO:0098978,GO:0099092,GO:0099523,GO:0099527,GO:1900383	postsynaptic density|Cajal body|cell junction|dendritic spine|postsynaptic membrane|receptor localization to synapse|hippocampal mossy fiber to CA3 synapse|glutamatergic synapse|postsynaptic density, intracellular component|presynaptic cytosol|postsynapse to nucleus signaling pathway|regulation of synaptic plasticity by receptor localization to synapse
ANO8	363.377	209.604	517.149	2.46726	1.30291	3.73216e-22	5.51848e-21	Up	2.95322	2.69843	2.23231	5.85896	6.86914	6.50223	GeneID:101791135	anoctamin 8	GO:0005229,GO:0005788,GO:0005886,GO:0006821,GO:0016021,GO:0034220,GO:0043687,GO:0044267	intracellular calcium activated chloride channel activity|endoplasmic reticulum lumen|plasma membrane|chloride transport|integral component of membrane|ion transmembrane transport|post-translational protein modification|cellular protein metabolic process
ANPEP	2147.44	846.507	3448.37	4.07364	2.02632	6.9856e-173	8.0815e-171	Up	9.57821	10.1452	8.78521	35.489	36.0716	37.2849	GeneID:101804534	alanyl aminopeptidase, membrane	GO:0005737,GO:0005793,GO:0005886,GO:0006508,GO:0008270,GO:0009897,GO:0016021,GO:0042277,GO:0043171,GO:0070006,GO:0070062	cytoplasm|endoplasmic reticulum-Golgi intermediate compartment|plasma membrane|proteolysis|zinc ion binding|external side of plasma membrane|integral component of membrane|peptide binding|peptide catabolic process|metalloaminopeptidase activity|extracellular exosome	path:apla00480	Glutathione metabolism
AOAH	27.9989	40.7816	15.2162	0.373114	-1.42231	0.00048765	0.00184363	Down	0.166675	0.246881	0.378821	0.0266742	0.0917368	0.132041	GeneID:101793271	acyloxyacyl hydrolase	GO:0005509,GO:0005576,GO:0006631,GO:0009104,GO:0031410,GO:0050528	calcium ion binding|extracellular region|fatty acid metabolic process|lipopolysaccharide catabolic process|cytoplasmic vesicle|acyloxyacyl hydrolase activity
AOC2	16.9068	25.8367	7.977	0.308747	-1.6955	0.00320602	0.0102503	Down	0.32596	0.243571	0.481852	0.0460336	0.0908608	0.150737	GeneID:101792268	amine oxidase, copper containing 2	GO:0002523,GO:0002675,GO:0002687,GO:0005507,GO:0005509,GO:0005615,GO:0005737,GO:0005769,GO:0005783,GO:0005794,GO:0005886,GO:0005902,GO:0007155,GO:0008131,GO:0008217,GO:0009308,GO:0009986,GO:0010828,GO:0016021,GO:0035902,GO:0042755,GO:0042803,GO:0043231,GO:0046677,GO:0046982,GO:0048038,GO:0052593,GO:0052594,GO:0052595,GO:0052596,GO:1902283	leukocyte migration involved in inflammatory response|positive regulation of acute inflammatory response|positive regulation of leukocyte migration|copper ion binding|calcium ion binding|extracellular space|cytoplasm|early endosome|endoplasmic reticulum|Golgi apparatus|plasma membrane|microvillus|cell adhesion|primary amine oxidase activity|regulation of blood pressure|amine metabolic process|cel…	path:apla00260,path:apla00350,path:apla00360,path:apla00410	Glycine, serine and threonine metabolism|Tyrosine metabolism|Phenylalanine metabolism|beta-Alanine metabolism
APAF1	1080.29	389.592	1770.98	4.54573	2.18451	9.13131e-55	3.07804e-53	Up	3.91274	3.60153	3.09533	13.0169	15.5361	15.2721	GeneID:101799443	apoptotic peptidase activating factor 1			path:apla04115,path:apla04210,path:apla05168	p53 signaling pathway|Apoptosis|Herpes simplex infection
APOB	101.306	23.2506	179.361	7.71427	2.94753	7.92822e-35	1.70104e-33	Up	0.069289	0.075294	0.0715721	0.496065	0.499913	0.498886	GeneID:101799540	apolipoprotein B
APOBEC1	20.5812	0	41.1624	Inf	Inf	1.06221e-18	1.3727e-17	Up	0	0	0	0.420116	0.540247	0.561489	GeneID:101792029	apolipoprotein B mRNA editing enzyme catalytic subunit 1	GO:0003723,GO:0004126,GO:0005634,GO:0005737,GO:0006397,GO:0006641,GO:0008270,GO:0010332,GO:0016554,GO:0016556,GO:0017091,GO:0042127,GO:0042158,GO:0042953,GO:0048255,GO:0080111,GO:0090209,GO:0090310	RNA binding|cytidine deaminase activity|nucleus|cytoplasm|mRNA processing|triglyceride metabolic process|zinc ion binding|response to gamma radiation|cytidine to uridine editing|mRNA modification|AU-rich element binding|regulation of cell proliferation|lipoprotein biosynthetic process|lipoprotein transport|mRNA stabilization|DNA demethylation|negative regulation of triglyceride metabolic process|…
APOH	22.0412	30.5439	13.5385	0.443247	-1.17382	0.00973005	0.0274817	Down	0.894702	1.06782	0.634731	0.461923	0.22891	0.358641	GeneID:101799362	apolipoprotein H	GO:0001937,GO:0005543,GO:0006641,GO:0007597,GO:0008201,GO:0009986,GO:0010596,GO:0016525,GO:0030195,GO:0031639,GO:0033033,GO:0034361,GO:0034364,GO:0034392,GO:0042627,GO:0042802,GO:0051006,GO:0051918,GO:0060230	negative regulation of endothelial cell proliferation|phospholipid binding|triglyceride metabolic process|blood coagulation, intrinsic pathway|heparin binding|cell surface|negative regulation of endothelial cell migration|negative regulation of angiogenesis|negative regulation of blood coagulation|plasminogen activation|negative regulation of myeloid cell apoptotic process|very-low-density lipopr…
APOLD1	93.0327	4.75982	181.306	38.0908	5.25137	2.73589e-61	1.03842e-59	Up	0.061447	0.137743	0.030156	2.33609	2.86266	2.69266	GeneID:101798726	apolipoprotein L domain containing 1	GO:0001525,GO:0001666,GO:0005576,GO:0005654,GO:0005829,GO:0005886,GO:0006869,GO:0008289,GO:0016021,GO:0030154,GO:0042118,GO:0042157,GO:0045601	angiogenesis|response to hypoxia|extracellular region|nucleoplasm|cytosol|plasma membrane|lipid transport|lipid binding|integral component of membrane|cell differentiation|endothelial cell activation|lipoprotein metabolic process|regulation of endothelial cell differentiation
APRT	322.175	214.143	430.207	2.00897	1.00646	1.76983e-15	1.93013e-14	Up	8.39589	10.5706	8.42756	16.3383	16.5405	15.7875	GeneID:101803803	adenine phosphoribosyltransferase	GO:0002055,GO:0003999,GO:0005654,GO:0005829,GO:0006166,GO:0006168,GO:0007625,GO:0016208,GO:0044209	adenine binding|adenine phosphoribosyltransferase activity|nucleoplasm|cytosol|purine ribonucleoside salvage|adenine salvage|grooming behavior|AMP binding|AMP salvage	path:apla00230	Purine metabolism
AQP3	36.3539	23.2925	49.4152	2.12151	1.08509	0.00187293	0.00628116	Up	0.751661	0.490245	0.920063	1.13105	1.71084	1.41593	GeneID:101795669	aquaporin 3 (Gill blood group)	GO:0002684,GO:0005634,GO:0005737,GO:0005911,GO:0015254,GO:0015840,GO:0016021,GO:0016323,GO:0032526,GO:0042476,GO:0070295,GO:0071456,GO:0090650	positive regulation of immune system process|nucleus|cytoplasm|cell-cell junction|glycerol channel activity|urea transport|integral component of membrane|basolateral plasma membrane|response to retinoic acid|odontogenesis|renal water absorption|cellular response to hypoxia|cellular response to oxygen-glucose deprivation
ARC	97.2366	27.7341	166.739	6.01206	2.58786	3.35926e-16	3.81905e-15	Up	0.268206	0.188727	0.193718	1.11379	1.02866	1.44746	GeneID:101790723	activity regulated cytoskeleton associated protein	GO:0003729,GO:0005737,GO:0005886,GO:0005938,GO:0006897,GO:0007010,GO:0007492,GO:0007616,GO:0009952,GO:0014069,GO:0015629,GO:0016477,GO:0022604,GO:0030054,GO:0031901,GO:0043197,GO:0045121,GO:0045211,GO:0048168,GO:0051028,GO:0051260,GO:0098978,GO:0099149,GO:0110077,GO:1900271,GO:1900452,GO:1903561,GO:2000969	mRNA binding|cytoplasm|plasma membrane|cell cortex|endocytosis|cytoskeleton organization|endoderm development|long-term memory|anterior/posterior pattern specification|postsynaptic density|actin cytoskeleton|cell migration|regulation of cell morphogenesis|cell junction|early endosome membrane|dendritic spine|membrane raft|postsynaptic membrane|regulation of neuronal synaptic plasticity|mRNA trans…
ARFGAP1	4329.82	2385.84	6273.81	2.6296	1.39485	8.00874e-110	5.81982e-108	Up	20.4484	24.2085	22.8934	53.7669	54.7566	54.4689	GeneID:101801367	ADP ribosylation factor GTPase activating protein 1	GO:0000139,GO:0005096,GO:0015031,GO:0016192,GO:0030100,GO:0032012,GO:0046872	Golgi membrane|GTPase activator activity|protein transport|vesicle-mediated transport|regulation of endocytosis|regulation of ARF protein signal transduction|metal ion binding	path:apla04144	Endocytosis
ARHGAP20	149.491	227.595	71.3875	0.31366	-1.67272	6.27747e-20	8.54788e-19	Down	2.45051	1.90846	2.52569	0.68228	0.557249	0.778046	GeneID:101795059	Rho GTPase activating protein 20
[truncated: 1,579 more rows]

## Sheet: DEGs-36h
gene_id	baseMean	baseMean_control_36h_Con	baseMean_case_36h_DTMUV	foldChange	log2FoldChange	pval	padj	up_down	expression_Sample_36h_C_1	expression_Sample_36h_C_2	expression_Sample_36h_C_3	expression_Sample_36h_V_1	expression_Sample_36h_V_2	expression_Sample_36h_V_3	gene_Dbxref	description	GO_id	GO_term	pathway	pathway_description
[truncated: 3,583 more rows]

[truncated: 2 more sheets: DEGs-48h, DEGs-60h]
