# Supplementary material for: Transcriptome analysis of duck embryo fibroblasts for the dynamic response to duck tembusu virus infection and dual regulation of apoptosis genes
Source: Aging (Albany NY). 2020 Sep 7;12(17):17503–27. doi: 10.18632/aging.103759 (PMC7521532; doi:10.18632/aging.103759)
Supplement: Supplementary Dataset 2 [file aging-12-103759-s001..xlsx]

## Sheet: GO.top.Total
Supplementary Dataset 2. Information of the GO terms of the differentially expressed genes at 12, 24, 36, 48 and 60 hpi.
id	term	category	ListHits	pval	Enrichment_score	Gene
GO:0051607	defense response to virus	biological_process	32	1.17961e-32	16.755	CGAS; DDX58; DDX60; DHX58; DTX3L; FADD; IFIH1; IFITM1; IL6; IRF1; IRF2; IRF7; LOC101790937; LOC101795565; LOC101795904; LOC101796052; LOC101797569; LOC101797692; LOC101798516; LOC101798847; LOC110353866; LOC113840163; LOC113840164; LOC113840165; NLRC5; PARP9; RSAD2; SAMHD1; STAT1; TLR3; TMEM173; TRIM25
GO:0045087	innate immune response	biological_process	28	1.72486e-17	7.20744	C1R; CGAS; DDX58; DDX60; DHX58; DTX3L; FADD; IFIH1; LOC101789908; LOC101790937; LOC101791534; LOC101795565; LOC101797569; LOC101798516; LOC101798744; LOC101805457; LOC110353866; LOC113845682; LY86; NLRC5; PARP9; RNF135; RSAD2; SAMHD1; TLR3; TMEM173; TRIM14; TRIM25
GO:0009615	response to virus	biological_process	10	1.57696e-11	15.3587	DDX58; DDX60; DHX58; IFIH1; IFITM1; LOC101795565; LOC101798516; LOC101798847; LOC110353866; RSAD2
GO:0002230	positive regulation of defense response to virus by host	biological_process	7	5.23732e-11	24.8102	CGAS; DDX58; DTX3L; IL23R; LOC101790937; PARP9; TMEM173
GO:0071222	cellular response to lipopolysaccharide	biological_process	11	3.92009e-09	8.59046	CD274; CMPK2; IL6; IL8; LOC101800429; LOC101803350; LOC113843368; NUGGC; PDCD1LG2; TNFAIP3; TNIP2
GO:0006955	immune response	biological_process	14	4.32836e-09	6.38679	ATP6V0A2; B2M; CD274; CD36; CYSLTR2; IFITM1; IL18R1; IL8; LOC101790497; LOC101797502; LOC101800429; LOC106015872; PDCD1LG2; TNFSF8
GO:0060337	type I interferon signaling pathway	biological_process	4	4.65415e-09	36.8609	IFITM1; IP6K2; LOC101791120; STAT1
GO:0045071	negative regulation of viral genome replication	biological_process	6	1.16988e-08	18.4304	IFITM1; LOC101795565; LOC101797569; LOC101798516; LOC110353866; RSAD2
GO:0032722	positive regulation of chemokine production	biological_process	5	1.93745e-08	23.0381	IL6; LOC101798516; LOC106015872; LOC110353866; TLR3
GO:0071360	cellular response to exogenous dsRNA	biological_process	4	2.74284e-08	30.7174	CGAS; DDX58; IFIH1; TMEM173
GO:0042612	MHC class I protein complex	cellular_component	3	0	46.0761	B2M; LOC101790497; LOC101797502
GO:0031225	anchored component of membrane	cellular_component	7	1.46746e-05	6.20256	CPM; LOC101791268; LOC101791980; LOC101792564; LOC101798228; LOC101798651; LPL
GO:0005615	extracellular space	cellular_component	32	0.000306984	1.83616	ADAMTS15; CCL19; CLEC3B; CNP; COL8A2; COL9A3; CPM; CYTL1; GREM1; IGF1; IL6; IL8; INHBB; LOC101789646; LOC101794647; LOC101796052; LOC101798847; LOC101800424; LOC101800921; LOC101800938; LOC106015872; LOC113840163; LOC113840164; LOC113840165; LPL; LRRC32; LY86; SEMA3C; SFRP4; TIMP4; TNFSF8; WNT2B
GO:0009897	external side of plasma membrane	cellular_component	12	0.00044942	2.75081	ANPEP; CCL19; CD274; IL12B; IL23R; LOC101793739; LOC101800429; LOC101804439; LOC101804743; LOC113845392; NLGN1; PDCD1LG2
GO:0009986	cell surface	cellular_component	15	0.000811818	2.31927	ADAMTS15; CD274; CPM; GREM1; LOC101791980; LOC101792564; LOC101793233; LPL; LRRC32; NLGN1; PDCD1LG2; PLVAP; SDC4; SFRP4; SLC26A9
GO:0032982	myosin filament	cellular_component	3	0.000971525	6.5823	LOC101796474; MYBPC1; MYH7B
GO:0001650	fibrillar center	cellular_component	6	0.00138627	3.59035	IP6K2; LOC101791534; LOC101805457; LOC113845682; RPAIN; RSAD2
GO:0005901	caveola	cellular_component	3	0.00897928	3.63759	CAV3; HTR2A; PLVAP
GO:0005765	lysosomal membrane	cellular_component	8	0.0115186	2.18112	ATP6V0A2; DRAM1; DTX3L; IFITM1; LAMP3; LITAF; LOC101790937; LOC101794396
GO:0016021	integral component of membrane	cellular_component	70	0.0218803	1.2334	ACSL5; AGTR1; ANPEP; APOLD1; ATP10A; ATP6V0A2; C3H1orf115; CD274; CD36; CD7; CMTM6; DLL4; DRAM1; ERBB3; GJA5; GPR160; HACD4; IFITM1; IL17RA; IL18R1; KCNG3; LAMP3; LOC101789968; LOC101790497; LOC101793233; LOC101793739; LOC101793849; LOC101796621; LOC101796643; LOC101797502; LOC101800429; LOC101800493; LOC101801932; LOC101802145; LOC101802261; LOC101804439; LOC101804639; LOC101804743; LOC113839921…
GO:0005125	cytokine activity	molecular_function	14	2.09954e-10	7.86666	GREM1; IL12B; IL6; IL8; INHBB; LITAF; LOC101789646; LOC101796052; LOC101798847; LOC106015872; LOC113840163; LOC113840164; LOC113840165; TNFSF8
GO:0005126	cytokine receptor binding	molecular_function	4	4.65415e-09	36.8609	LOC101796052; LOC113840163; LOC113840164; LOC113840165
GO:0003950	NAD+ ADP-ribosyltransferase activity	molecular_function	6	9.74013e-07	10.633	ART5; LOC101789908; LOC101796889; LOC101798744; LOC101802866; PARP9
GO:0097677	STAT family protein binding	molecular_function	3	1.06833e-06	27.6457	DTX3L; LOC101790937; PARP9
GO:0008083	growth factor activity	molecular_function	11	1.66517e-06	5.06837	FGF4; FGF7; GDNF; HGF; IGF1; IL12B; IL6; IL8; INHBB; LOC101789646; LOC106015872
GO:0048020	CCR chemokine receptor binding	molecular_function	4	1.93103e-06	16.755	CCL19; LOC101800424; LOC101800921; LOC101800938
GO:0008009	chemokine activity	molecular_function	5	2.12223e-06	12.1253	CCL19; IL8; LOC101800424; LOC101800921; LOC101800938
GO:0003725	double-stranded RNA binding	molecular_function	7	5.69583e-06	7.01158	DDX58; DDX60; DHX58; IFIH1; LOC101798516; LOC110353866; TLR3
GO:0008271	secondary active sulfate transmembrane transporter activity	molecular_function	3	7.2246e-06	19.7469	LOC101802145; SLC26A7; SLC26A9
GO:0019531	oxalate transmembrane transporter activity	molecular_function	3	7.2246e-06	19.7469	LOC101802145; SLC26A7; SLC26A9
