# Supplementary material for: Transcriptome analysis of duck embryo fibroblasts for the dynamic response to duck tembusu virus infection and dual regulation of apoptosis genes
Source: Aging (Albany NY). 2020 Sep 7;12(17):17503–27. doi: 10.18632/aging.103759 (PMC7521532; doi:10.18632/aging.103759)
Supplement: Supplementary Dataset 3 [file aging-12-103759-s002..xlsx]

## Sheet: KEGG.top.Up
Supplementary Dataset 3. Information of the KEGG pathways of the differentially expressed genes at 12, 24, 36, 48 and 60 hpi.
id	term	ListHits	pval	Enrichment_score	Gene
path:apla04060	Cytokine-cytokine receptor interaction	49	1.98299e-15	3.29127	ACKR4; BMP2; CCL20; IFNAR2; IFNG; IL10; IL10RA; IL12B; IL12RB1; IL12RB2; IL13RA1; IL17RA; IL18R1; IL18RAP; IL1RL1; IL23R; IL31RA; IL34; IL6; IL7R; IL8; INHBA; INHBB; LIF; LOC101793135; LOC101794111; LOC101798847; LOC101800429; LOC101800921; LOC101800938; LOC101800964; LOC101802072; LOC101802159; LOC101802348; LOC101802825; LOC101802909; LOC101803147; LOC106015872; LOC106017909; TNFRSF11B; TNFRSF1…
path:apla05168	Herpes simplex infection	36	1.42706e-12	3.47967	APAF1; B2M; BAK1; BID; BIRC2; C5; CGAS; DDX58; FADD; IFIH1; IFNAR2; IFNG; IKBKE; IL12B; IL6; IRF7; JAK2; LOC101790497; LOC101792161; LOC101795904; LOC101796105; LOC101797502; LOC101798516; LOC101798847; LOC110353866; NFKB1; NFKBIA; PML; STAT1; TAP1; TAP2; TLR2; TLR3; TMEM173; TRAF3; TRAF5
path:apla04623	Cytosolic DNA-sensing pathway	16	7.26228e-10	5.28395	ADAR; CGAS; DDX58; IKBKE; IL6; IRF7; LOC101789899; LOC101795904; LOC101798847; LOC101800921; LOC101800938; LOC101802909; NFKB1; NFKBIA; RIPK1; TMEM173
path:apla04620	Toll-like receptor signaling pathway	23	8.79426e-09	3.5057	CD86; FADD; IFNAR2; IKBKE; IL12B; IL6; IL8; IRF7; JUN; LOC101795904; LOC101798847; LOC101800921; LOC101800938; LOC101802909; MAP3K8; NFKB1; NFKBIA; RIPK1; STAT1; TLR1-A; TLR2; TLR3; TRAF3
path:apla05164	Influenza A	29	4.92526e-08	2.80307	ADAR; CIITA; DDX58; IFIH1; IFNAR2; IFNG; IKBKE; IL12B; IL6; IL8; IRF7; JAK2; JUN; LOC101789899; LOC101793492; LOC101795904; LOC101796105; LOC101798516; LOC101798847; LOC110353866; NFKB1; NFKBIA; NUP98; PML; RSAD2; STAT1; TLR3; TNFSF10; TRIM25
path:apla04622	RIG-I-like receptor signaling pathway	16	5.22762e-07	3.65812	DDX58; DHX58; FADD; IFIH1; IKBKE; IL12B; IL8; IRF7; LOC101795904; LOC101798847; NFKB1; NFKBIA; RIPK1; TMEM173; TRAF3; TRIM25
path:apla04621	NOD-like receptor signaling pathway	23	1.09079e-05	2.46346	BIRC2; FADD; IFNAR2; IKBKE; IL6; IL8; IRF7; JUN; LOC101789899; LOC101795904; LOC101798847; NAMPT; NFKB1; NFKBIA; P2RX7; PANX1; PRKCD; RIPK1; STAT1; TMEM173; TNFAIP3; TRAF3; TRAF5
path:apla04217	Necroptosis	22	7.16874e-05	2.25479	BID; BIRC2; CFLAR; FADD; IFNAR2; IFNG; JAK2; LOC101789899; LOC101792932; LOC101794396; LOC101795967; LOC101798516; LOC101798847; LOC110353866; PLA2G4A; RIPK1; STAT1; STAT4; TLR3; TNFAIP3; TNFSF10; TRAF5
path:apla04010	MAPK signaling pathway	35	0.000997886	1.64471	ANGPT1; ANGPT4; CACNA1I; DUSP1; DUSP16; DUSP5; DUSP8; EPHA2; FGF1; FGF10; FGF4; FGF5; FGF7; FLT3; GADD45B; HGF; JUN; KIT; KITLG; LOC101792932; LOC101794396; MAP3K6; MAP3K8; MKNK1; MYC; NFKB1; NTF3; PDGFB; PGF; PLA2G4A; RAP1A; RASGRF2; RASGRP1; TAOK3; TEK
path:apla04080	Neuroactive ligand-receptor interaction	41	0.00211934	1.51852	ADORA2B; ADRA2A; AVPR1A; BDKRB2; C5; CCK; CYSLTR2; EDN1; EDNRB; GABRA1; GALR1; GHSR; GPR156; GRIN2C; HCRTR2; HTR2A; HTR2B; HTR2C; HTR4; HTR7; LOC101789968; LOC101791362; LOC101792161; LOC101798492; LOC101799912; LPAR3; MC2R; MTNR1B; NMB; OPRK1; OPRM1; P2RX4; P2RX5; P2RX7; P2RY2; POMC; PRLHR; RXFP3; SSTR3; TSHR; TSPO2
path:apla04514	Cell adhesion molecules (CAMs)	17	0.00254618	1.92487	CD226; CD274; CD86; CLDN1; CTLA4; ICOSLG; JAM2; LOC101790497; LOC101793849; LOC101797502; LRRC4C; NLGN1; PDCD1LG2; SDC2; SDC4; VCAM1; VCAN
path:apla04625	C-type lectin receptor signaling pathway	14	0.00428072	1.95817	IKBKE; IL10; IL12B; IL6; IRF1; JUN; LOC101789899; LOC101794933; NFKB1; NFKBIA; PLK3; PRKCD; PTGS2; STAT1
path:apla05132	Salmonella infection	12	0.00428489	2.06763	ARPC1B; IFNG; IL6; IL8; JUN; LOC101789899; LOC101800921; LOC101800938; LOC101802909; NFKB1; NOS2; RILP
path:apla04210	Apoptosis	18	0.00590096	1.7541	APAF1; BAK1; BCL2A1; BID; BIRC2; CASP7; CFLAR; CTSS; FADD; GADD45B; JUN; LOC101804924; MCL1; NFKB1; NFKBIA; PTPN13; RIPK1; TNFSF10
path:apla04115	p53 signaling pathway	10	0.0130531	1.91756	ADGRB1; APAF1; BID; CCND1; CDK6; GADD45B; RRM2; SHISA5; THBS1; TP73
path:apla00590	Arachidonic acid metabolism	8	0.0191686	1.94104	GGT5; HPGDS; LOC101792932; LOC101794396; LOC101800035; PLA2G4A; PLA2G6; PTGS2
path:apla04512	ECM-receptor interaction	11	0.0309413	1.65541	CD44; CD47; COL6A6; COL9A3; GP1BA; ITGB6; LAMB3; SDC4; THBS1; TNC; VTN
path:apla00120	Primary bile acid biosynthesis	3	0.031906	2.37778	CH25H; LOC101791081; LOC101797490
path:apla00565	Ether lipid metabolism	7	0.0357136	1.80918	CEPT1; ENPP2; LOC101792932; LOC101794396; PLA2G4A; PLA2G6; PLD4
path:apla04020	Calcium signaling pathway	20	0.043474	1.40697	ADORA2B; AVPR1A; BDKRB2; CACNA1I; CAMK1D; CYSLTR2; EDNRB; GRIN2C; HTR2A; HTR2B; HTR2C; HTR4; HTR7; ITPKA; LOC101799912; NOS2; P2RX4; P2RX5; P2RX7; PTK2B
