# Supplementary material for: Transcriptome analysis of duck embryo fibroblasts for the dynamic response to duck tembusu virus infection and dual regulation of apoptosis genes
Source: Aging (Albany NY). 2020 Sep 7;12(17):17503–27. doi: 10.18632/aging.103759 (PMC7521532; doi:10.18632/aging.103759)
Supplement: Supplementary Dataset 4 [file aging-12-103759-s006..xlsx]

## Sheet: Positive
Supplementary Dataset 4. Information of apoptosis related genes.
gene name	12h	24h	36h	48h	60h
	log2(fold change)
TNFRSF9	0.696474	3.02621	5.45743	5.67766	5.10767
CASP7	2.73749	2.89845	3.09838	3.01556	2.74361
APAF1	1.65455	2.18451	1.69734	0.875883	0.599231
BAK1	1.18826	1.90732	1.17364	0.788312	0.853599
TSC22D3	1.23636	1.7807	1.79515	0.640671	1.24345
INHBA	0.221546	1.48667	3.25461	3.10737	2.61738
BID	0.620058	1.12741	0.200452	0.368711	1.07473
MCF2L	1.066	1.12215	0.604056	1.13173	1.30177
LMNA	0.313491	0.971502	1.47061	1.20787	1.80314
HMGB2	0.532089	0.985391	1.23557	0.589896	0.969736
IGFBP3	0.0822523	0.434198	1.19552	0.577812	0.0920011
FAS	0.836397	0.311735	0.426585	0.666809	0.996509
TP73	-0.379241	1.11556	1.78054	0.850405	0.0263053
CASP8	0.175348	0.0977404	0.886729	0.78159	0.55114
SPTAN1	0.0255378	0.235691	0.44903	0.158836	0.246516
DDIT3	-0.299737	-0.0397969	1.31458	0.758122	1.65083
CYC	-0.101217	0.157127	0.435596	0.711776	0.533538
JMY	-0.175175	-0.00931326	0.474662	0.699622	0.921899
LMNB2	0.263236	-0.0442703	0.329464	0.148455	0.415916
ZMAT3	0.323169	0.196662	-0.0412592	0.0185442	-0.144974
CASP9	-0.263439	0.0904961	-0.201682	0.242415	0.137109
UNC5B	-0.121854	-0.0720579	-0.00284533	0.426052	0.803884
CYFIP2	0.0522523	-0.295097	0.375003	1.30417	1.18957
PIDD1	-0.58426	-0.203544	0.169896	0.912375	0.634725
DFFB	-0.0672528	-0.20856	0.471647	0.635597	1.59955
MSH2	0.114342	-0.196966	0.055156	0.48236	1.09524
TGFB2	-0.0522745	0.645627	0.102835	-0.620628	-0.767062
PARP3	0.192614	0.585688	-0.0360738	-0.352036	-0.739432
TOP2A	0.0795529	-0.0839852	0.551243	-0.445356	-0.280682
ARHGEF3	0.0312224	0.139491	0.0436614	-0.440117	-0.0679101
PLEKHF1	-0.116122	-0.441204	0.24571	0.224919	0.543873
NME3	-0.155857	-0.547654	-0.220165	0.118523	0.969688
HMGB1	0.236431	-0.174034	-0.466188	-0.586391	-0.206277
LMNB1	0.205809	-0.200347	-0.463589	-0.7017	0.135309
MSH6	0.284819	0.220495	-0.17989	-0.545632	-0.096086
CASP2	-0.224602	-0.276913	-0.372414	-0.304594	0.187514
CASP3	0.303659	0.286115	-0.428341	-0.342684	-0.00612008
SIVA1	-0.687009	-0.232846	-0.332854	-0.0637486	-0.435289
RPS27L	-0.727866	-0.304052	-0.494349	-0.100534	0.558874
PARP4	0.354486	0.276343	-0.661284	-0.801998	-0.790074
BCL2L11	-0.198128	-0.140747	-1.37835	-1.14008	-0.564918
PARP1	-0.0114316	-0.148654	-0.927295	-1.00351	-1.01399
SOX4	-0.746648	-0.315136	-0.861732	-0.785562	-0.419155
SORT1	-0.852486	-0.631149	-1.24032	-1.63649	-1.7239
PLEKHG5	-0.506397	-0.661783	-0.745916	-0.392702	-0.317963

## Sheet: Negative
gene name	12h	24h	36h	48h	60h
	log2(fold change)
GADD45B	-0.0478997	1.87728	4.1251	2.82228	1.70388
PTGS2	1.21497	2.55424	3.51167	3.78257	4.62783
CITED2	0.538873	2.19342	3.49841	2.66831	1.61733
CFLAR	1.40624	2.35058	3.3909	2.86957	2.23702
BIRC2	1.85488	2.66494	2.9906	2.02993	1.47869
TRAF1	0.560534	0.768215	1.25381	0.774319	0.545035
PTPN13	0.689159	1.24788	1.08337	0.818943	0.64904
XIAP	0.485558	0.568714	1.02421	0.992632	1.09887
BCL2L1	-0.0622559	0.336834	0.805643	1.18342	1.1951
TRAF2	0.170396	0.728153	0.743808	0.541635	0.19426
ANGPTL4	0.233254	1.17965	0.58246	1.736	1.98298
BTG2	0.274827	0.378589	0.567859	0.583051	0.515007
CDH13	0.139109	0.0603899	0.54667	1.18174	1.73402
BCL6	0.193502	0.379483	0.443664	0.168069	-0.0266661
MAP3K14	0.390322	0.444938	0.308006	-0.00579559	-0.0543989
BNIP3	0.150971	-0.0349383	-0.0635129	-0.123374	0.150574
GLO1	0.117188	0.0527386	-0.156219	0.0934531	0.22314
BCL2	0.38694	0.632156	-0.0349149	-0.556465	-0.170101
GADD45G	-0.165757	0.431509	0.969897	-0.224477	-0.872815
BCL2A1	1.00654	1.37919	0.830967	-0.19878	-1.27079
GADD45A	-0.538861	-0.444583	-0.422909	-0.158108	0.68372
TRIAP1	-0.0992833	-0.448132	0.180282	0.270589	0.139775
RRM2B	0.0521766	-0.330623	-0.0536268	0.152607	-0.122936
BIRC5	-0.147245	-0.307651	-0.21649	-0.282034	0.171573
NOTCH1	-0.0641001	-0.0443532	-0.596908	-0.294162	-0.175263
BRCA1	-0.247652	-0.325336	-0.699051	-1.09109	-0.434714
ERCC6	-0.0771203	-0.341718	-0.78282	-0.303939	-0.465601
SOD2	-0.0523203	-0.0651165	-0.88477	-1.13921	-1.26134
BRCA2	-0.149098	-0.621072	-1.11321	-1.06356	0.1611
FAIM	-0.102758	-1.05859	-1.23317	-1.63162	-2.24275
HIPK3	-0.306842	-0.560568	-1.33342	-1.56825	-1.88752

## Sheet: Both
gene name	12h	24h	36h	48h	60h
	log2(fold change)
IL6	3.25144	5.9906	7.30391	7.56159	7.34276
MYC	-0.404341	1.13312	1.41606	1.52517	2.05031
PRKDC	-0.0350288	-0.162744	-0.463291	-0.07274	-0.0331186
HSPD1	0.0414219	-0.163212	-0.450496	-0.215709	0.153354
GADD45A	-0.538861	-0.444583	-0.422909	-0.158108	0.68372
