# Supplementary material for: Transcriptome analysis of duck embryo fibroblasts for the dynamic response to duck tembusu virus infection and dual regulation of apoptosis genes
Source: publisher site journal article supplement (doi:10.18632/aging.103759), 2020-09-06
Supplement: Supplementary file [file aging-v12i17-103759-supplementary-material-SD2.pdf]

## SUPPLEMENTARY TABLES

**Supplementary Table 1. Information of DNA replication related genes.**

| Gene  | Putative function                                                                                                          | 12hpi                          | 24hpi | 36hpi | 48hpi | 60hpi |
|-------|----------------------------------------------------------------------------------------------------------------------------|--------------------------------|-------|-------|-------|-------|
| Name  | (cell component, function and process)                                                                                     | Log <sub>2</sub> (fold change) |       |       |       |       |
| BLM   | ATP-dependent DNA helicase activity; DNA replication initiation                                                            | -0.43                          | -0.38 | -0.94 | -1.53 | 0.43  |
| BRCA2 | structure-specific DNA binding; transcription, DNA-dependent                                                               | -0.15                          | -0.62 | -1.11 | -1.06 | 0.16  |
| CDT1  | S phase of mitotic cell cycle; DNA-dependent DNA replication initiation                                                    | -0.09                          | 0.35  | -0.22 | -0.06 | 0.11  |
| DKC1  | RNA-directed DNA polymerase activity; rRNA processing;                                                                     | 0.10                           | -0.49 | -0.34 | -0.06 | 0.17  |
| DNA2  | DNA helicase activity; DNA strand elongation                                                                               | -0.08                          | 0.22  | 0.12  | -0.63 | 0.43  |
| DSCC1 | DNA replication; mitotic sister chromatid cohesion                                                                         | -0.12                          | -0.54 | -0.68 | -0.47 | 0.20  |
| GINS2 | the initiation of DNA replication; DNA-dependent DNA replication                                                           | -0.06                          | -0.14 | -0.54 | -0.55 | 1.01  |
| HMGB1 | negative regulation of transcription from RNA polymerase II promoter;<br>DNA conformation change                           | 0.24                           | -0.17 | -0.47 | -0.59 | 0.21  |
| MCM4  | helicase activity; DNA-dependent DNA replication;                                                                          | -0.02                          | -0.02 | -0.59 | -0.53 | 0.15  |
| MCM5  | Regulation of gene expression                                                                                              | -0.19                          | 0.26  | 0.21  | -0.38 | 0.16  |
| POLA1 | DNA-directed RNA polymerase activity; structure-specific DNA binding;<br>DNA strand elongation involved in DNA replication | 0.02                           | -0.08 | -0.24 | -0.48 | 0.07  |
| POLD3 | DNA replication; DNA repair                                                                                                | 0.11                           | 0.04  | -0.24 | -0.29 | 0.19  |
| PRIM1 | DNA polymerase, primase complex; replication fork                                                                          | 0.05                           | 0.14  | -0.71 | -0.59 | 0.93  |
| RAD51 | DNA-dependent ATPase activity; DNA-dependent DNA replication                                                               | -0.05                          | 0.03  | -0.51 | -2.05 | 1.47  |
| RFC2  | DNA metabolic process; DNA clamp loader activity                                                                           | 0.01                           | 0.03  | -0.63 | -1.06 | 0.94  |
| RFC3  | nucleoside-triphosphatase activity; DNA-dependent DNA replication; DNA repair                                              | -0.04                          | -0.08 | -0.63 | -0.91 | 0.48  |
| RFC5  | DNA metabolic process; DNA clamp loader activity                                                                           | -0.34                          | -0.06 | -0.07 | 0.25  | 0.01  |
| RPA1  | structure-specific DNA binding; DNA replication; nucleotide-excision repair                                                | 0.24                           | 0.65  | -0.22 | -0.53 | 0.23  |
| SMC3  | motor activity; DNA replication; chromosome segregation;                                                                   | 0.34                           | 0.13  | -0.05 | -0.33 | 0.40  |
| TERT  | sequence-specific DNA binding; RNA-dependent DNA replication                                                               | -0.30                          | -0.07 | -1.37 | -0.19 | 1.42  |
| TFAM  | DNA-dependent DNA replication; mitochondrial transcription factor                                                          | 0.00                           | -0.07 | -0.06 | -0.63 | 0.87  |
| TIPIN | DNA replication involved in S phase;                                                                                       | 0.12                           | 0.17  | -0.09 | -0.21 | 0.28  |

**Supplementary Table 2. Information of DNA repair related genes.**

| Gene     | Putative function                                                                                                                                      | 12hpi                          | 24hpi | 36hpi | 48hpi | 60hpi |
|----------|--------------------------------------------------------------------------------------------------------------------------------------------------------|--------------------------------|-------|-------|-------|-------|
| Name     | (cell component, function and process)                                                                                                                 | Log <sub>2</sub> (fold change) |       |       |       |       |
| XPC      | DNA secondary structure binding; nucleotide-excision repair                                                                                            | 0.20                           | 0.04  | -0.63 | -0.82 | -0.47 |
| ERCC6    | helicase activity; nucleotide-excision repair; RNA elongation                                                                                          | -0.08                          | -0.34 | -0.78 | -0.30 | -0.47 |
| DDB2     | nucleotide-excision repair                                                                                                                             | -0.12                          | -0.14 | 0.19  | 0.27  | 0.19  |
| RPA1     | recombinational repair; DNA replication; nucleotide-excision repair                                                                                    | 0.24                           | 0.65  | -0.22 | -0.53 | -0.23 |
| RPA2     | structure-specific DNA binding; DNA replication; nucleotide-excision repair                                                                            | 0.03                           | -0.08 | -0.04 | 0.03  | 0.22  |
| RPA3     | structure-specific DNA binding; nucleotide-excision repair                                                                                             | 0.41                           | 0.15  | 0.53  | 0.13  | 0.44  |
| XRCC2    | ATPase activity, coupled; recombinational repair                                                                                                       | -0.23                          | -0.07 | -0.36 | -0.58 | -0.45 |
| RAD51    | DNA-dependent ATPase activity; recombinational repair                                                                                                  | -0.05                          | 0.03  | -0.51 | -2.05 | -1.47 |
| RAD54L   | nucleoside-triphosphatase activity; recombinational repair                                                                                             | -0.23                          | 0.27  | -0.70 | -0.29 | -0.22 |
| RAD54B   | helicase activity; recombinational repair                                                                                                              | -0.01                          | 0.03  | -0.75 | -0.41 | -0.33 |
| RAD51AP1 | structure-specific DNA binding; recombinational repair                                                                                                 | 0.27                           | 0.86  | 0.03  | 0.57  | 0.39  |
| BRCA2    | structure-specific DNA binding; recombinational repair; transcription, DNA-dependent                                                                   | -0.15                          | -0.62 | -1.11 | -1.06 | 0.16  |
| BRCA1    | recombinational repair; regulation of gene-specific transcription from RNA polymerase II promoter                                                      | -0.25                          | -0.33 | -0.70 | -1.09 | -0.43 |
| EME1     | Homologous recombination                                                                                                                               | -0.21                          | 0.11  | -0.24 | -0.39 | -0.66 |
| XRCC4    | DNA ligation; non-homologous recombination                                                                                                             | 0.31                           | 0.38  | -0.24 | -0.31 | -0.06 |
| PRKDC    | Non-homologous recombination                                                                                                                           | -0.04                          | -0.16 | -0.46 | -0.07 | -0.03 |
| MSH2     | single base insertion or deletion binding; sequence-specific DNA binding; mismatch repair                                                              | 0.11                           | -0.20 | 0.06  | 0.48  | 1.10  |
| MSH6     | regulation of DNA recombination; mismatch repair                                                                                                       | 0.28                           | 0.22  | -0.18 | -0.55 | -0.10 |
| EXO1     | single-stranded DNA specific exodeoxyribonuclease activity; mismatch repair                                                                            | 0.02                           | -0.10 | 0.67  | -0.55 | 0.20  |
| MUTYH    | nuclease activity; base-excision repair, AP site formation                                                                                             | -0.79                          | -0.09 | -0.89 | -0.83 | 0.48  |
| FEN1     | endodeoxyribonuclease activity; structure-specific DNA binding; base excision repair                                                                   | -0.16                          | 0.13  | -0.15 | 0.02  | 0.36  |
| NEIL3    | DNA secondary structure binding; base excision repair                                                                                                  | -0.17                          | -0.20 | 0.39  | 0.07  | -1.12 |
| OGG1     | oxidized base lesion DNA N-glycosylase activity; base-excision repair, AP site formation                                                               | -0.12                          | 0.22  | 0.57  | -0.27 | -0.15 |
| HMGB1    | base-excision repair; regulation of gene-specific transcription from RNA polymerase II promoter                                                        | 0.24                           | -0.17 | -0.47 | -0.59 | -0.21 |
| HMGB2    | base-excision repair; regulation of gene-specific transcription from RNA polymerase II promoter                                                        | 0.53                           | 0.99  | 1.24  | 0.59  | 0.97  |
| PMS1     | nucleoside-triphosphatase activity; DNA repair; DNA recombination                                                                                      | 0.38                           | 0.01  | 0.09  | -0.22 | -0.09 |
| FANCC    | DNA repair                                                                                                                                             | -0.15                          | 0.34  | 0.96  | 0.06  | 0.98  |
| USP1     | endopeptidase activity; DNA repair;                                                                                                                    | 0.10                           | 0.01  | -0.06 | -0.06 | 0.29  |
| RBBP8    | endodeoxyribonuclease activity; DNA double-strand break processing                                                                                     | 0.25                           | 0.12  | -0.26 | -0.59 | 0.34  |
| DCLRE1C  | exonuclease activity; DNA repair                                                                                                                       | 0.16                           | -0.10 | -0.52 | -0.98 | -0.57 |
| RFC3     | nucleoside-triphosphatase activity; DNA-dependent DNA replication; DNA repair                                                                          | -0.04                          | -0.08 | -0.63 | -0.91 | -0.48 |
| MAD2L2   | nucleotidyltransferase activity; translesion synthesis                                                                                                 | -0.17                          | -0.04 | -0.26 | -0.41 | -0.45 |
| BLM      | ATP-dependent DNA helicase activity; DNA damage checkpoint; recombinational repair;                                                                    | -0.43                          | -0.38 | -0.94 | -1.53 | -0.43 |
| POLA1    | DNA-directed RNA polymerase activity; DNA strand elongation involved in DNA replication                                                                | 0.02                           | -0.08 | -0.24 | -0.48 | -0.07 |
| TRIP13   | adenyl ribonucleotide binding; DNA repair; DNA recombination;                                                                                          | 0.21                           | 0.04  | -0.36 | -1.07 | -0.48 |
| BRIP1    | DNA helicase activity; DNA repair; regulation of transcription, DNA-dependent                                                                          | 0.13                           | -0.14 | -0.45 | -0.58 | -0.10 |
| TP73     | sequence-specific DNA binding; DNA repair; regulation of gene-specific transcription from RNA polymerase II promotertransduction by p53 class mediator | -0.38                          | 1.12  | 1.78  | 0.85  | 0.03  |
| TUBB6    | nucleoside-triphosphatase activity; DNA repair                                                                                                         | 0.00                           | 0.25  | -0.64 | -1.38 | -1.78 |
| POLD3    | DNA replication; DNA repair                                                                                                                            | 0.11                           | 0.04  | -0.24 | -0.29 | -0.19 |
| TDP1     | nuclease activity; structure-specific DNA binding; DNA repair                                                                                          | 0.08                           | 0.21  | 0.78  | 1.06  | 1.79  |
| PARP1    | nucleotide binding; nucleic acid binding; DNA repair; transcription, DNA-dependent                                                                     | -0.01                          | -0.15 | -0.93 | -1.00 | -1.01 |
